# Supplementary material
Source: MDPI journal article supplement (https://www.mdpi.com/search?q=computation-07-00026)
Supplement: s001 [file computation-07-00026-s001.xlsx]

## Sheet: Table S1
Exploring the Chemical Space of Cytochrome P450 Inhibitors using Integrated Physicochemical Parameters, Drug Efficiency Metrics and Decision Tree Models Yusra Sajid Kiani and Ishrat Jabeen* Research Center for Modeling and Simulation (RCMS), National University of Science and Technology (NUST), Sector H-12, 44000, Islamabad, Pakistan * Correspondence: Corresponding Author: Ishrat.jabeen@rcms.nust…
TABLE S1: LipE and LE profiling results of CYP1A2 inhibitors dataset
CMPD_CHEMBLID CYP1A2	CANONICAL_SMILES	IC50(µM)	clogp	pIC50	LipE	ΔG	a_heavy	Ligand efficiency
CHEMBL81923	O=C1N2C(=[N+](c3c1cccc3)C)c1[nH]c3c(c1CC2)cccc3	5.63	-1.81	5.24949	7.05949	7.42058	23	0.322634
CHEMBL525607	o1nc(nc1-c1n[nH]c2c1cccc2)CN	0.21	0.44	6.67778	6.23778	9.43959	16	0.589974
CHEMBL3217887	Brc1cc\2c(N(C)C(=O)/C/2=C\2/NC(=S)NC/2=O)cc1	0.04898	1.08	7.30998	6.22998	10.3333	19	0.543855
CHEMBL512079	o1nc(nc1-c1nn(c2c1cccc2)Cc1ccccc1)CN	0.009	2.3	8.04576	5.74576	11.3733	23	0.494493
CHEMBL45245	O=C1Nc2c(-c3c1cccc3)cccc2	0.016	2.2	7.79588	5.59588	11.0201	14	0.734674
CHEMBL413956	OC=1N2C(N=C3C=1C=CC=C3)=C1N=C3C(=C1C=C2)C=CC=C3	0.03	1.94	7.52288	5.58288	10.6342	22	0.483373
CHEMBL9419	Oc1cc(NC(=O)C)ccc1	2	0.49	5.69897	5.20897	8.05596	11	0.73236
CHEMBL14192	n1ccn(c1)Cc1ccccc1	0.2	1.5	6.69897	5.19897	9.46954	12	0.789128
CHEMBL3217886	o1c(ccc1\C=N\n1cnnc1)-c1c2c(ccc1)cccc2	0.04786	2.15	7.32003	5.17003	10.3475	22	0.470339
CHEMBL416	O1c2c(C=CC1=O)cc1c(occ1)c2OC	0.04	2.31	7.39794	5.08794	10.4576	16	0.653599
CHEMBL1800951	S(=O)(=O)(N(C)C)N1C[C@H](Oc2cc(NC(=O)Nc3cccnc3)cc(F)c2)CC1	0.06	2.19	7.22185	5.03185	10.2087	17	0.352023
CHEMBL467519	o1nc(nc1-c1nn(c2c1cccc2)CCc1ccccc1)CN	0.034	2.44	7.46852	5.02852	10.5574	24	0.43989
CHEMBL603095	O=C1c2c3C(=CC(=O)N(c3ccc2N)C)c2c1cccc2	0.016	2.79	7.79588	5.00588	11.0201	15	0.524767
CHEMBL2178256	Clc1cc(ccc1)-c1oncc1NC(=O)c1c2n(nc1)C=CC(=N2)N	0.5	1.33	6.30103	4.97103	8.90702	18	0.356281
CHEMBL1800931	Fc1cc(NC(=O)Nc2cccnc2)cc(O[C@@H]2CCCN(C2)C(=O)C)c1	0.08	2.34	7.09691	4.75691	10.0321	21	0.371558
CHEMBL311469	O=C(Nc1cc2Cc3c(-c2cc1)cccc3)C	0.016	3.09	7.79588	4.70588	11.0201	17	0.648242
CHEMBL405845	o1cccc1CN1c2nc([nH]c2C(=O)N(C)C1=O)C	1.4	1.18	5.85387	4.67387	8.27492	19	0.435522
CHEMBL2420615	O=C1N(C)C(=O)N=C2N(N=C(N=C12)c1ccc(cc1)CC)C	1.5	1.18	5.82391	4.64391	8.23257	22	0.374208
CHEMBL309490	O1c2c(C(=O)C(O)=C1c1ccccc1)c(O)cc(O)c2	0.04	2.76	7.39794	4.63794	10.4576	20	0.52288
CHEMBL2178257	Clc1cc(ccc1)-c1nocc1NC(=O)c1c2n(nc1)C=CC(=N2)N	1.2	1.33	5.92082	4.59082	8.36956	21	0.334782
CHEMBL314132	O(C)c1c2N=C3N(CCc4c3[nH]c3c4cccc3)C(=O)c2ccc1	0.011	3.42	7.95861	4.53861	11.2501	17	0.468756
CHEMBL112592	O(Cc1ncccc1)c1ccc(-n2ccnc2)cc1	0.12	2.39	6.92082	4.53082	9.78314	16	0.514902
CHEMBL1110	O=C1N(CCc2n(c3c(c12)cccc3)C)Cc1nc[nH]c1C	0.6047	1.74	6.21846	4.47846	8.7903	22	0.399559
CHEMBL85139	O=C1N2C(=Nc3c1cccc3)c1[nH]c3c(c1CC2)cccc3	0.022	3.2	7.65758	4.45758	10.8246	22	0.492028
CHEMBL112532	O(CCCC)c1ccc(-n2ccnc2)cc1	0.007	3.71	8.1549	4.4449	11.5276	16	0.720476
CHEMBL2030386	Brc1cc2c3N=C(NC(=O)c3oc2cc1)CN1C[C@H](O)CC1	5.1	0.96	5.29243	4.33243	7.48128	22	0.340058
CHEMBL3091540	O1CCN(C[C@@H]1c1ccccc1OC)C1=NC(=CC(=O)N1C)c1ncncc1	15.7	0.49	4.8041	4.3141	6.79099	28	0.242535
CHEMBL466917	o1nc(nc1-c1nn(c2c1cccc2)Cc1cc(ccc1)C)CN	0.084	2.8	7.07572	4.27572	10.0021	24	0.416754
CHEMBL1921976	O[C@@]1(CCn2c1cnc2)c1cc2c(cc(cc2)C(=O)NC)cc1	28	0.31	4.55284	4.24284	6.43581	23	0.279818
CHEMBL828	S1c2c(Nc3c1cccc3)cccc2	0.016	3.56	7.79588	4.23588	11.0201	21	0.787151
CHEMBL85740	O(C)c1c2N=C3N(CCc4c3[nH]c3c4cccc3)C(=O)c2ccc1OC	0.029	3.33	7.5376	4.2076	10.655	23	0.409808
CHEMBL466715	o1nc(nc1-c1n(nc2c1cccc2)Cc1ccccc1)CN	0.315	2.3	6.50169	4.20169	9.19067	23	0.399594
CHEMBL506	O(C)c1cc(NC(CCCN)C)c2ncccc2c1	0.1824	2.6	6.73897	4.13898	9.52609	19	0.501373
CHEMBL297784	O=C(Nc1cccnc1)N1CCc2c1cc1c(n(cc1)C)c2	0.05	3.18	7.30103	4.12103	10.3206	22	0.469118
CHEMBL2062563	O=C(Nc1cc2n(ccc2cc1)C1=Nc2n(ncc2C#N)C(NC2CC2)=C1)C	0.1	2.9	7	4.1	9.89507	20	0.353395
CHEMBL461458	OC1CCc2cc(ccc2C1)-c1cccnc1	0.6	2.17	6.22185	4.05185	8.79509	17	0.517358
CHEMBL150	O1c2c(C(=O)C(O)=C1c1ccc(O)cc1)c(O)cc(O)c2	0.716	2.1	6.14509	4.04509	8.68658	21	0.413647
CHEMBL3091541	Fc1cc(OC)c(cc1)[C@@H]1OCCN(C1)C1=NC(=CC(=O)N1C)c1ncncc1	16.5	0.77	4.78252	4.01252	6.76048	20	0.23312
CHEMBL511401	o1nc(nc1-c1n(nc2c1cccc2)CCc1ccccc1)CN	0.36	2.44	6.4437	4.0037	9.10869	24	0.379529
CHEMBL446083	O=C1N(c2c(cc(cc2)-c2cccnc2)CC1)C	1.79	1.75	5.74715	3.99715	8.12406	18	0.451337
CHEMBL960	FC(F)(F)c1ccc(NC(=O)c2cnoc2C)cc1	0.5	2.32	6.30103	3.98103	8.90702	19	0.46879
CHEMBL14352	FC(F)(F)c1cc2N(CCc2cc1OC)C(=O)Nc1cccnc1	0.02	3.72	7.69897	3.97897	10.8831	24	0.453463
CHEMBL2178255	Clc1cc(ccc1)-c1n[nH]cc1NC(=O)c1c2n(nc1)C=CC(=N2)N	3.1	1.54	5.50864	3.96864	7.78691	22	0.311476
CHEMBL226034	O1c2c(C(=O)C(O)=C1c1cc(O)c(OC)cc1)c(O)cc(O)c2	1.215	1.95	5.91542	3.96542	8.36193	23	0.363562
CHEMBL379064	O1c2c(C(=O)C(O)=C1c1cc(OC)c(O)cc1)c(O)cc(O)c2	1.261	1.95	5.89928	3.94929	8.33912	23	0.36257
CHEMBL598215	O(C[C@@H]1[C@H]2CNC[C@@]12c1cc2c(cc1)cccc2)C	0.9	2.11	6.04576	3.93576	8.54617	19	0.449798
CHEMBL3091539	Fc1ccccc1[C@@H]1OCCN(C1)C1=NC(=CC(=O)N1C)c1ncncc1	23.3	0.71	4.63264	3.92264	6.54862	27	0.242541
CHEMBL459071	O=C1Nc2c(C1)cc(cc2)-c1cccnc1	6.58	1.26	5.18177	3.92177	7.32486	16	0.457804
CHEMBL448430	o1nc(nc1-c1nn(c2c1cccc2)Cc1cc(cc(c1)C)C)CN	0.062	3.29	7.20761	3.91761	10.1885	25	0.407542
CHEMBL466871	o1nc(nc1-c1n[nH]c2c1cccc2)CNC(OC(C)(C)C)=O	0.79	2.2	6.10237	3.90237	8.6262	19	0.375052
CHEMBL1080002	O1C2=CC(=O)C=CC2=Nc2c1cc(OCC)cc2	0.5	2.4	6.30103	3.90103	8.90702	25	0.494834
CHEMBL50	O1c2c(C(=O)C(O)=C1c1cc(O)c(O)cc1)c(O)cc(O)c2	4.097	1.5	5.38753	3.88753	7.61572	22	0.346169
CHEMBL1214336	S(=O)(=O)(NC1Cc2cc(ccc2C1)-c1cccnc1)C(C)C	0.6	2.34	6.22185	3.88185	8.79509	22	0.399777
CHEMBL193306	Fc1cc(F)c(NC2=NC=Nn3c2c(C(C)C)c(c3)-c2oc(cn2)C)cc1C(=O)NOC	0.064	3.33	7.19382	3.86382	10.1691	32	0.317783
CHEMBL62811	O=C1Nc2c(cc(cc2)-c2cccnc2)CC1	1.95	1.85	5.70997	3.85997	8.0715	17	0.474794
CHEMBL1650645	Oc1ccc2c(ccc(c2)-c2cc(O)ccc2)c1-c1cccnc1	0.01	4.15	8	3.85	11.3087	24	0.471194
CHEMBL2147537	n1c(cc2c(ccnc2)c1NC[C@@H](N)C)-c1ccncc1	2.4	1.77	5.61979	3.84979	7.94403	12	0.378287
CHEMBL456807	N(N)c1ccccc1	8	1.26	5.09691	3.83691	7.2049	8	0.900612
CHEMBL3091536	Fc1ccc(cc1)[C@@H]1OCCN(C1)C1=NC(=CC(=O)N1C)c1ncncc1	29.4	0.71	4.53165	3.82165	6.40586	27	0.237254
CHEMBL462093	O=C1CCc2cc(ccc2C1)-c1cccnc1	1.55	1.99	5.80967	3.81967	8.21244	16	0.483085
CHEMBL461884	n1cc(ccc1)-c1cc2CCC(=Cc2cc1)C#N	0.18	2.94	6.74473	3.80473	9.53422	18	0.529679
CHEMBL1672633	Fc1cnccc1-c1ncc(nc1-c1ocnc1)NC(=O)C1CC1	25	0.8	4.60206	3.80206	6.50539	12	0.271058
CHEMBL2030402	Clc1cc2c3N=C(NC(=O)c3oc2cc1)[C@H]1NCCC1	6.9	1.39	5.16115	3.77115	7.29571	20	0.364785
CHEMBL511329	S=C1Nc2c(cc(cc2)-c2cccnc2)CC1	0.64	2.43	6.19382	3.76382	8.75547	17	0.515028
CHEMBL1455	n1c(nc(nc1N(C)C)N(C)C)N(C)C	4	1.66	5.39794	3.73794	7.63043	15	0.508695
CHEMBL625	s1cc(nc1)-c1[nH]c2c(n1)cccc2	0.8	2.36	6.09691	3.73691	8.61848	14	0.615606
CHEMBL117	O1c2c(C(=O)C=C1c1ccccc1)c(O)cc(O)c2	0.054	3.56	7.26761	3.70761	10.2734	19	0.540703
CHEMBL314445	O(C)c1cc(OC)cc2c1N=C1N(CCc3c1[nH]c1c3cccc1)C2=O	0.041	3.68	7.38722	3.70722	10.4424	26	0.401632
CHEMBL1908355	Clc1cc\2c(N(C(=O)N)C(=O)/C/2=C(/O)\c2sccc2)cc1	1	2.3	6	3.7	8.48149	13	0.40388
CHEMBL312248	O(C)c1cc2N=C3N(CCc4c3[nH]c3c4cccc3)C(=O)c2cc1	0.076	3.42	7.11919	3.69919	10.0635	24	0.419315
CHEMBL345544	O(CCCC)c1ccc(-n2ncnc2)cc1	0.283	2.85	6.54821	3.69821	9.25643	16	0.578527
CHEMBL113018	O1CCN(CC1)CCOc1ccc(-n2ccnc2)cc1	1.48	2.16	5.82974	3.66974	8.24081	20	0.41204
CHEMBL150799	o1nccc1-c1ccccc1OCCCC	0.12	3.27	6.92082	3.65082	9.78314	19	0.611446
CHEMBL459970	n1cc(ccc1)-c1cc2CCC(Cc2cc1)C#N	0.66	2.54	6.18046	3.64046	8.73658	18	0.485365
CHEMBL448743	O=C1CCc2c1ccc(c2)-c1cccnc1	1.55	2.19	5.80967	3.61967	8.21244	17	0.513277
CHEMBL3091531	Fc1cnccc1C=1N=C(N(C)C(=O)C=1)N1C[C@@H](OCC1)c1ccc(F)cc1	5.5	1.65	5.25964	3.60964	7.43493	12	0.265533
CHEMBL85106	Clc1cc2c(N=C3N(CCc4c3[nH]c3c4cccc3)C2=O)cc1	0.029	3.93	7.5376	3.6076	10.655	26	0.463261
CHEMBL243664	O1c2c(C(=O)C=C1c1ccc(OC)cc1)c(O)cc(O)c2	0.08	3.49	7.09691	3.60691	10.0321	27	0.477717
CHEMBL276140	S(C)c1cc2CCN(c2cc1C(F)(F)F)C(=O)Nc1cccnc1	0.013	4.29	7.88606	3.59606	11.1476	24	0.464483
CHEMBL40919	O1c2c(C(=O)C(O)=C1c1ccc(OC)cc1)c(O)cc(O)c2	0.509	2.7	6.29328	3.59328	8.89607	22	0.404367
CHEMBL283196	O1c2c(ccc3c2cccc3)C(=O)C=C1c1ccccc1	0.006	4.65	8.22185	3.57185	11.6223	21	0.553441
CHEMBL3122113	FC(F)(F)c1cnc(nc1NC)Nc1cn(nc1C)C(C#N)(C)C	0.7	2.62	6.1549	3.5349	8.70045	20	0.362519
CHEMBL3122120	FC(F)(F)c1cnc(nc1NC)Nc1cnn(c1C)C1COC1	2	2.21	5.69897	3.48897	8.05596	19	0.350259
CHEMBL2326713	FC(F)(F)c1cnc(nc1NC)Nc1cn(nc1C)C	0.7	2.67	6.1549	3.4849	8.70045	21	0.435023
CHEMBL86078	Clc1cc2N=C3N(CCc4c3[nH]c3c4cccc3)C(=O)c2cc1	0.039	3.93	7.40894	3.47894	10.4731	23	0.455354
CHEMBL460178	O(C)C1CCc2cc(ccc2C1)-c1cccnc1	0.44	2.88	6.35655	3.47655	8.9855	17	0.499194
CHEMBL122532	s1cccc1\C=C/c1cc(OC)cc(OC)c1	0.011	4.49	7.95861	3.46861	11.2501	24	0.661773
CHEMBL42428	s1cccc1\C=C\c1cc(OC)cc(OC)c1	0.011	4.49	7.95861	3.46861	11.2501	17	0.661773
CHEMBL276915	O1c2c(ccc(O)c2)C(=O)C=C1c1ccccc1	0.24	3.21	6.61979	3.40979	9.35761	18	0.519867
CHEMBL193	O(C(=O)C=1C(C(C(OC)=O)=C(NC=1C)C)c1ccccc1[N+](=O)[O-])C	0.3	3.12	6.52288	3.40288	9.22062	21	0.368825
CHEMBL499007	O(C)c1cc(cnc1)-c1cc2CCC(=O)Cc2cc1	1.56	2.41	5.80688	3.39688	8.20849	19	0.432026
CHEMBL3217889	O=[N+]([O-])c1cc2nc3-c4c5c(-c3nc2cc1)cccc5ccc4	0.02089	4.31	7.68006	3.37006	10.8564	23	0.472017
CHEMBL267865	ON\C=N\c1ccc(cc1C)CCCC	0.461	2.97	6.3363	3.3663	8.95687	15	0.597125
CHEMBL1672621	O=C(Nc1nc(c(nc1)-c1ccncc1)-c1cccnc1)C1CC1	25	1.24	4.60206	3.36206	6.50539	23	0.271058
CHEMBL375955	Clc1cc(Nc2nc(C(F)(F)F)c(cn2)C(=O)NCc2ccncc2)ccc1	0.4	3.04	6.39794	3.35794	9.04401	21	0.323
CHEMBL1956608	Brc1ccc(cc1)-c1nc(cc(n1)NCCc1ccc[n+]([O-])c1)C	0.97	2.69	6.01323	3.32323	8.50019	24	0.354174
CHEMBL3091546	O1CCN(CC1c1ccccc1)C1=NC(=CC(=O)N1C)c1ccncc1	23.1	1.32	4.63639	3.31639	6.55391	26	0.252074
CHEMBL397667	Brc1cc(c2nc([nH]c2c1)C=1C(=O)NC=CC=1N[C@@H](Cc1ccccc1)CO)C	0.052	3.97	7.284	3.314	10.2965	29	0.355052
CHEMBL3091529	Fc1ccc(cc1)[C@@H]1OCCN(C1)C1=NC(=CC(=O)N1C)c1ccncc1	17.1	1.46	4.767	3.307	6.73855	27	0.249576
CHEMBL3091544	Clc1cccc(F)c1[C@@H]1OCCN(C1)C1=NC(=CC(=O)N1C)c1ncncc1	19.5	1.42	4.70997	3.28997	6.65792	28	0.237783
CHEMBL1672611	o1cccc1-c1nc(NC(=O)C2CC2)cnc1-c1ccncc1	5	2.02	5.30103	3.28103	7.49344	15	0.325802
CHEMBL2326720	FC(F)(F)c1cnc(nc1NC)Nc1cn(nc1C)CCOC	1	2.73	6	3.27	8.48149	21	0.36876
CHEMBL2347912	O1c2c(C(=O)C=C1c1ccccc1)c(O)cc1OCC=Cc12	0.014	4.59	7.85387	3.26387	11.1021	22	0.50464
CHEMBL279564	c12c3c4ccc1cccc2ccc3ccc4	0.007	4.95	8.1549	3.2049	11.5276	16	0.720476
CHEMBL214321	O1c2c(C(=O)C=C1c1cc(OC)c(O)cc1)c(O)cc(O)c2	1.118	2.75	5.95156	3.20156	8.41301	22	0.38241
CHEMBL2347756	O1c2c(ccc3OCC=Cc23)C(=O)C=C1c1ccccc1	0.059	4.03	7.22915	3.19915	10.219	21	0.486619
CHEMBL2326716	FC(F)(F)c1cnc(nc1NC)Nc1cn(nc1C)CC	0.4	3.2	6.39794	3.19794	9.04401	25	0.430667
CHEMBL43013	O(C)c1cc(cc(OC)c1)\C=C\c1ccncc1	0.29	3.34	6.5376	3.1976	9.24143	18	0.513413
CHEMBL28	O1c2c(C(=O)C=C1c1ccc(O)cc1)c(O)cc(O)c2	0.795	2.91	6.09963	3.18963	8.62233	20	0.431116
CHEMBL457425	O=C1N(c2c(cc(cc2)-c2cccnc2)CC1)CC	3.48	2.28	5.45842	3.17842	7.71592	19	0.406101
CHEMBL151	O1c2c(C(=O)C=C1c1cc(O)c(O)cc1)c(O)cc(O)c2	3.37	2.31	5.47237	3.16237	7.73564	21	0.368364
CHEMBL3091547	Fc1ccc(cc1)C1OCCN(C1)C1=NC(=CC(=O)N1C)c1ccncc1	23.9	1.46	4.6216	3.1616	6.53301	27	0.241963
CHEMBL312848	O(C)c1cc2c(N=C3N(CCc4c3[nH]c3c4cccc3)C2=O)cc1	0.28	3.42	6.55284	3.13284	9.26298	24	0.385957
CHEMBL443487	n1ccccc1C#CC=1CCCC=1	2.184	2.55	5.66075	3.11075	8.00193	13	0.615533
CHEMBL1819089	Cl.Fc1cc(Cn2c3c(N(C)C(=O)N(C)C3=O)cc2N2C[C@@H](N)CCC2)c(cc1)C#N	14.7	1.73	4.83268	3.10268	6.83139	31	0.220367
CHEMBL196643	n1ccccc1C#CC=1CCCCC=1	0.676	3.11	6.17005	3.06005	8.72187	14	0.622991
CHEMBL1649661	FC(F)(F)c1nn(c2c1CCCC2)-c1ccc(cc1)C(=O)C	0.1	3.95	7	3.05	9.89507	22	0.449776
CHEMBL458224	O(C[C@@H]1N(CCC1)c1nc(nc(NC(=O)C)c1)-n1nc(cc1C)C)C	11	1.91	4.95861	3.04861	7.0094	25	0.280376
CHEMBL1085918	O=C(Nc1n[nH]c2c1ccc(c2)-c1cccnc1)CCC	1.2	2.88	5.92082	3.04082	8.36956	25	0.39855
CHEMBL2069803	o1nc(nc1C1CCCCC1)-c1ccncc1	2.4	2.58	5.61979	3.03979	7.94403	17	0.467296
CHEMBL447591	O(C)c1cc2c(cc(cc2)-c2cc(OC)cnc2)cc1	0.083	4.05	7.08092	3.03092	10.0095	20	0.500473
CHEMBL2326722	FC(F)(F)c1cnc(nc1NC)Nc1cn(nc1C)CCC#N	5.2	2.26	5.284	3.024	7.46936	21	0.324755
CHEMBL207028	s1c(cc(N)c1C(=O)N)-c1ccccc1	5	2.3	5.30103	3.00103	7.49344	17	0.499563
CHEMBL457646	O(C)c1cc(cnc1)-c1cc2CCC(=O)Nc2cc1	5.24	2.28	5.28067	3.00067	7.46465	19	0.392877
CHEMBL567597	O1[C@@H]2O[C@]3(OO[C@]24[C@@H](CC[C@H]([C@@H]4CC3)C)[C@@H](C)C1=O)C	2	2.72	5.69897	2.97897	8.05596	20	0.402798
CHEMBL1956589	Brc1ccc(cc1)-c1nc(cc(n1)NCCO)C	0.66	3.21	6.18046	2.97046	8.73658	18	0.485365
CHEMBL98350	O1c2c(cccc2-c2ccccc2)C(=O)C=C1N1CCOCC1	1	3.03	6	2.97	8.48149	23	0.36876
CHEMBL60889	Clc1cc(C(=O)NCC2OCCN(C2)Cc2ccc(F)cc2)c(OCC)cc1N	0.4	3.44	6.39794	2.95794	9.04401	25	0.311862
CHEMBL230309	Clc1cc(ccc1)C(O)CNC=1C=CNC(=O)C=1c1[nH]c2c(n1)c(ccc2)C	0.38	3.47	6.42022	2.95022	9.0755	27	0.324125
CHEMBL194246	O(C1C=C(CCC1)C#Cc1ncccc1)c1ccncc1	1.021	3.05	5.99097	2.94097	8.46873	21	0.403273
CHEMBL459969	O(CC)C1CCc2cc(ccc2C1)-c1cccnc1	0.62	3.27	6.20761	2.93761	8.77496	19	0.46184
CHEMBL426467	O(C1C=C(CCC1)C#Cc1ncccc1)c1cccnc1	1.038	3.05	5.9838	2.9338	8.45859	21	0.40279
CHEMBL196054	S(C1C=C(CCC1)C#Cc1ncccc1)c1ccncc1	0.505	3.37	6.29671	2.92671	8.90091	21	0.423853
CHEMBL3094294	O(Cc1nc2c(cc1)cccc2)c1cc2n(cnc2cc1)-c1ncncc1	0.7	3.23	6.1549	2.9249	8.70045	22	0.322239
CHEMBL1917511	s1cc(nc1NC(=O)c1n(nc(c1)C(C)(C)C)Cc1ccccc1)CN	1.5	2.9	5.82391	2.92391	8.23257	22	0.316637
CHEMBL103299	NCCc1ccc(cc1)C	14	1.93	4.85387	2.92387	6.86134	10	0.686134
CHEMBL114297	O(CCCN(C)C)c1ccc(-n2ccnc2)cc1	3.4	2.57	5.46852	2.89852	7.7302	18	0.429456
CHEMBL387611	Clc1cc(ccc1)C(O)CNC=1C=CNC(=O)C=1c1[nH]c2c(n1)c(cc(c2)C1=NCCN1C)C	53	1.38	4.27572	2.89572	6.04408	21	0.177767
CHEMBL1255834	s1cccc1COc1cc2c([nH]cc2CC(N)C)cc1	0.8738	3.17	6.05859	2.88859	8.56431	20	0.428215
CHEMBL90568	O1c2c(C(=O)C=C1c1cc(O)c(OC)cc1)c(O)cc(O)c2	2.437	2.75	5.61314	2.86314	7.93464	22	0.360665
CHEMBL195557	O=C1Cc2c(C1)cccc2	80	1.24	4.09691	2.85691	5.79132	10	0.579132
CHEMBL502824	O(C)c1cc2c(cc(cc2)-c2cc(cnc2)C(=O)C)cc1	0.488	3.46	6.31158	2.85158	8.92193	21	0.424854
CHEMBL467114	Clc1cc(Cc2nc(ccc2)C(=O)[O-])c(OCc2ccc(Cl)cc2F)cc1.[Na+]	20	1.85	4.69897	2.84897	6.64238	26	0.237228
CHEMBL122617	Oc1c2c(ccc1)cccc2	3.2	2.65	5.49485	2.84485	7.76742	11	0.706129
CHEMBL3289805	Clc1c(cccc1Cl)C(O)Cn1c2ncccc2nc1N	5.2	2.46	5.284	2.824	7.46936	23	0.355684
CHEMBL1649670	FC(F)(F)c1nn(c2c1CCCC2)-c1ccc(cc1)CN1CCCC1=O	1	3.25	6	2.75	8.48149	23	0.326211
CHEMBL1276654	Fc1c2CCC3(Oc2ccc1)CCN(CC3)c1nnc(cc1)-c1oc(nn1)Cc1cccnc1	18	2.02	4.74473	2.72473	6.70706	32	0.197266
CHEMBL399910	O1c2c(C(=O)C[C@H]1c1ccccc1)c(O)cc(O)c2	1.491	3.11	5.82652	2.71652	8.23626	19	0.433488
CHEMBL2069556	Brc1ccc(cc1F)-c1nc(cc(n1)NC[C@@H](O)CO)C	1.7	3.06	5.76955	2.70955	8.15573	21	0.388368
CHEMBL10	S(=O)(C)c1ccc(cc1)-c1[nH]c(c(n1)-c1ccc(F)cc1)-c1ccncc1	2	2.99	5.69897	2.70897	8.05596	21	0.298369
CHEMBL165	Oc1cc(cc(O)c1)\C=C\c1ccc(O)cc1	3	2.83	5.52288	2.69288	7.80704	17	0.459238
CHEMBL2018913	S(CCCO)c1[nH]c2c(n1)cc(OC)cc2	8.08	2.4	5.09259	2.69259	7.19879	16	0.449924
CHEMBL47529	O(Cc1ccccc1)C=1c2n(C=CC=1)c(CC#N)c(n2)C	2	3.05	5.69897	2.64897	8.05596	23	0.383617
CHEMBL27	O(CC(O)CNC(C)C)c1c2c(ccc1)cccc2	4	2.75	5.39794	2.64794	7.63043	16	0.401601
CHEMBL2326718	FC(F)(F)c1cnc(nc1NC)Nc1cn(nc1C)C(C)C	0.7	3.51	6.1549	2.6449	8.70045	24	0.395475
CHEMBL1270269	FC(F)(F)c1cc(ccc1)-c1nc(nc(c1)CCCNC(C(=O)N)(C)C)C#N	35	1.82	4.45593	2.63593	6.29882	23	0.224958
CHEMBL457856	O(C)c1cc(cnc1)-c1cc2CCC(=O)N(c2cc1)C	16.5	2.17	4.78252	2.61252	6.76048	29	0.338024
CHEMBL325429	O(CCN(C)C)c1ccc(-n2ccnc2)cc1	15	2.22	4.82391	2.60391	6.81899	17	0.401117
CHEMBL231509	Clc1cc(ccc1)C(O)CNC=1C=CNC(=O)C=1c1[nH]c2c(n1)c(cc(c2)C(=O)N(C)C)C	15	2.22	4.82391	2.60391	6.81899	22	0.206636
CHEMBL2069550	Clc1cc(F)c(cc1F)-c1nc(cc(n1)NCCc1ccc[n+]([O-])c1)C	3.7	2.83	5.4318	2.6018	7.67829	18	0.295319
CHEMBL1698322	Clc1cc(NC(=O)c2ncccc2)ccc1N1C(=O)C(CC1=O)c1ccccc1	8.9	2.45	5.05061	2.60061	7.13945	29	0.246188
CHEMBL192418	n1c2c(cccc2)c(cc1C)C	2.4	3.03	5.61979	2.58979	7.94403	21	0.662002
CHEMBL312149	O(C)c1cc2[nH]c3c(CCN4C3=Nc3c(cccc3)C4=O)c2cc1	1.98	3.15	5.70333	2.55333	8.06213	24	0.335922
CHEMBL494948	Fc1cnc(nc1O[C@@H](Cc1cc(F)ccc1)C)N1CCNC[C@H]1C	0.4	3.85	6.39794	2.54794	9.04401	26	0.36176
CHEMBL453169	O(C)c1cc2c(cc(cc2)-c2cnccc2N)cc1	1.42	3.3	5.84771	2.54771	8.26622	19	0.435064
CHEMBL113275	O(CCCCCCN(C)C)c1ccc(-n2ccnc2)cc1	0.8	3.56	6.09691	2.53691	8.61848	21	0.410404
CHEMBL270361	O(C)c1cc(ccc1O)\C=C\1/CC\C(=C\c2cc(OC)c(O)cc2)\C/1=O	38.9	1.92	4.41005	2.49005	6.23397	26	0.239768
CHEMBL470266	O1c2c(C(=O)C[C@H]1c1ccc(OC)cc1)c(O)cc(O)c2	3.147	3.03	5.5021	2.4721	7.77767	21	0.370365
CHEMBL207071	s1c(cc(N)c1C(=O)N)-c1ccc(F)cc1	12	2.45	4.92082	2.47082	6.95598	16	0.434749
CHEMBL194502	n1c2c(cc(cc2)C)ccc1C	3.3	3.03	5.48149	2.45149	7.74853	12	0.645711
CHEMBL2070154	S(=O)(=O)(CC)c1cc2nc([nH]c2cc1)-c1nc(ccc1)-c1ccccc1	0.4	3.95	6.39794	2.44794	9.04401	26	0.347847
CHEMBL151207	O(CCCC)c1ccc(-n2cc(nc2)C)cc1	0.386	3.98	6.41341	2.43341	9.06588	17	0.533287
CHEMBL86022	O(C)c1c2c(N=C3N(CCc4c3[nH]c3c4cccc3)C2=O)ccc1OC	1.73	3.33	5.76195	2.43195	8.14499	26	0.313269
CHEMBL8996	O1c2c(C(=O)C[C@H]1c1cc(O)c(O)cc1)c(O)cc(O)c2	53.214	1.85	4.27397	2.42397	6.04161	21	0.287696
CHEMBL151449	o1nccc1-c1cc(OCCCC)ccc1	0.57	3.83	6.24413	2.41413	8.82658	16	0.551661
CHEMBL381192	Clc1cc(OC2C=C(CCC2)C#Cc2ncccc2)cnc1	0.608	3.81	6.2161	2.4061	8.78696	22	0.399407
CHEMBL16807	O1c2c(C(=O)C=C1c1ccccc1)c(O)ccc2	0.31	4.11	6.50864	2.39864	9.20049	18	0.511138
CHEMBL1649662	S(=O)(=O)(C)c1ccc(-n2nc(c3CCCCc23)C(F)(F)F)cc1	4	3	5.39794	2.39794	7.63043	19	0.331758
CHEMBL85826	O(C)c1cc2c3CCN4C(=Nc5c(cccc5)C4=O)c3[nH]c2cc1	2.92	3.15	5.53462	2.38462	7.82363	24	0.325985
CHEMBL197212	n1ccccc1C#CC1=CC(Nc2cccnc2)CCC1	3.418	3.1	5.46623	2.36623	7.72696	21	0.36795
CHEMBL513491	Clc1cc(F)ccc1COc1ccc(Cl)cc1Cc1nc(ccc1)C(=O)[O-].[Na+]	61	1.85	4.21467	2.36467	5.95778	28	0.212778
CHEMBL191667	n1cc2c(cc1C)cccc2	21	2.32	4.67778	2.35778	6.61242	11	0.601129
CHEMBL195661	n1cc(cc2c1cccc2)C	13	2.53	4.88606	2.35606	6.90684	11	0.627894
CHEMBL480016	S(=O)(=O)(N1C[C@@H](N(CC1)c1ncc(cc1F)C(F)(F)F)C)C[C@]12CC[C@H](CC1=O)C2(C)C	0.16	4.44	6.79588	2.35588	9.60653	32	0.300204
CHEMBL1241639	O1c2c(-n3nnnc3C1)cccc2CCN1CCN(CC1)c1c2c(nc(cc2)C)ccc1	1	3.66	6	2.34	8.48149	26	0.265047
CHEMBL212521	O=C(N[C@@H](Cc1ccc(cc1)-c1ccccc1)C#N)[C@@H](N)CC	14.896	2.5	4.82693	2.32693	6.82326	23	0.296663
CHEMBL194876	n1c2cc(ccc2ccc1C)C	4.4	3.03	5.35655	2.32655	7.57192	12	0.630993
CHEMBL3216551	Cl.Cl.o1cccc1C(Nc1cc2c([nH]cc2C=2CCN(CC=2)C)cc1)=N	9.52	2.7	5.02136	2.32136	7.09811	26	0.273004
CHEMBL1070	O(C)c1cc2c(cc(cc2)CCC(=O)C)cc1	5	2.98	5.30103	2.32103	7.49344	23	0.44079
CHEMBL1079481	S(CCCN1CC2(C(C2)C1)c1ccc(cc1)C(F)(F)F)c1nnc(n1C)-c1ocnc1C	5	2.98	5.30103	2.32103	7.49344	20	0.23417
CHEMBL2048855	s1cc(nc1N(C(=O)CSc1nnc(cc1)-c1ccccc1)C1CC1)C	20	2.39	4.69897	2.30897	6.64238	28	0.255476
CHEMBL2347911	O1c2c(C(=O)C=C1c1ccccc1)c(O)cc(OCC#C)c2	0.089	4.75	7.05061	2.30061	9.96661	22	0.453028
CHEMBL1649674	Fc1cc(-n2nc(c3CCCCc23)C(F)(F)F)ccc1CN1CCCC1=O	2	3.41	5.69897	2.28897	8.05596	24	0.298369
CHEMBL3217888	Brc1c2c3c(-c4nc5c(nc4-c3ccc2)cccc5)cc1	0.02188	5.38	7.65995	2.27995	10.828	21	0.515617
CHEMBL1095041	Clc1cc2[nH]nc(NC(=O)CCC)c2cc1-c1ccc(N)cc1	0.98	3.73	6.00877	2.27877	8.49389	23	0.3693
CHEMBL151170	O(CCCC)c1ccc(cc1)-c1nc[nH]c1	1.1	3.68	5.95861	2.27861	8.42298	16	0.526436
CHEMBL14864	FC(F)(F)c1cc2N(CCc2cc1OC)C(=O)Nc1cc(cnc1)-c1cnccc1C	0.2	4.43	6.69897	2.26897	9.46954	31	0.305469
CHEMBL2069559	Clc1ccc(cc1F)-c1nc(cc(n1)NC[C@@H](O)CO)CC	2.1	3.44	5.67778	2.23778	8.026	21	0.364818
CHEMBL2069558	Brc1ccc(cc1F)-c1nc(cc(n1)NC[C@@H](O)CO)CC	1.5	3.59	5.82391	2.23391	8.23257	22	0.374208
CHEMBL390526	Fc1cc(Nc2nc(C(F)(F)F)c(cn2)C(=O)NCC2CCOCC2)cc(F)c1	24	2.39	4.61979	2.22979	6.53045	22	0.225188
CHEMBL114555	O(CCN1CCN(CC1)C(OCC)=O)c1ccc(-n2ccnc2)cc1	2.24	3.43	5.64975	2.21975	7.98638	25	0.319455
CHEMBL2019024	S(Cc1ncccc1)c1[nH]c2c(n1)cc(cc2)C	3.29	3.27	5.4828	2.2128	7.75039	18	0.430577
CHEMBL2069557	Brc1ccc(cc1F)-c1nc(cc(n1)NC[C@H](O)CO)CC	1.6	3.59	5.79588	2.20588	8.19295	22	0.372407
CHEMBL1412492	s1cccc1-c1nc(sc1)Nc1ccc(OC)cc1	0.072	4.94	7.14267	2.20267	10.0967	19	0.531407
CHEMBL1089722	Brc1cc2c([nH]nc2NC(=O)CCC)cc1Cl	0.55	4.08	6.25964	2.17964	8.84851	17	0.5205
CHEMBL399121	O1c2c(C(=O)C[C@H]1c1cc(O)c(OC)cc1)c(O)cc(O)c2	34.647	2.29	4.46033	2.17033	6.30505	22	0.286593
CHEMBL2069549	Brc1cc(F)c(cc1F)-c1nc(cc(n1)NCCc1ccc[n+]([O-])c1)C	7.2	2.98	5.14267	2.16267	7.26958	26	0.279599
CHEMBL482410	O(C)c1ccc(cc1)\C=C\1/CCC\C(=C\c2ccc(OC)cc2)\C/1=O	11	2.8	4.95861	2.15861	7.0094	25	0.280376
CHEMBL511893	o1nc(nc1-c1nn(c2c1cccc2)Cc1ccc(NC(=O)C)cc1)CNC(OC(C)(C)C)=O	5.92	3.07	5.22768	2.15768	7.38975	34	0.217346
CHEMBL9352	O1c2c(C(=O)C[C@H]1c1ccc(O)cc1)c(O)cc(O)c2	26.339	2.44	4.5794	2.1394	6.47336	20	0.323668
CHEMBL3220148	O(C)c1cc(OC)c(OC)cc1\C=C\c1ccc(OC)cc1OC	0.236	4.49	6.62709	2.13709	9.36793	24	0.39033
CHEMBL490170	O1c2c(C(=O)C[C@H]1c1cc(OC)c(O)cc1)c(O)cc(O)c2	37.768	2.29	4.42288	2.13288	6.2521	22	0.284186
CHEMBL2326717	FC(F)(F)c1cnc(nc1NC)Nc1cnn(CC)c1C	4.7	3.2	5.3279	2.1279	7.53142	21	0.358639
CHEMBL270996	Fc1c2cc([nH]c2ccc1OC1=NC=Nn2c1c(C)c(OC[C@H](OC(=O)CN)C)c2)C	3.7	3.31	5.4318	2.1218	7.67829	26	0.247687
CHEMBL14126	Oc1cc2c(cc1)cccc2	17	2.65	4.76955	2.11955	6.74215	11	0.612923
CHEMBL43396	o1cc(cc1)\C=C\c1cc(OC)cc(OC)c1	0.74	4.02	6.13077	2.11077	8.66634	17	0.509785
CHEMBL296580	S(Cc1ncccc1)c1[nH]c2c(n1)cccc2	12.94	2.78	4.88807	2.10807	6.90968	17	0.406452
CHEMBL3220146	O(C)c1c(cccc1OC)\C=C\c1ccc(OC)cc1OC	0.247	4.5	6.6073	2.1073	9.33996	22	0.424544
CHEMBL2326715	Clc1n(ncc1Nc1nc(NC)c(cn1)C(F)(F)F)C	5.8	3.14	5.23657	2.09657	7.40232	20	0.370116
CHEMBL2018906	S(CC)c1[nH]c2c(n1)cc(OC)cc2	2.34	3.54	5.63078	2.09078	7.95957	14	0.568541
CHEMBL2347755	O1c2c(c3C=CCOc3cc2)C(=O)C=C1c1ccccc1	0.76	4.03	6.11919	2.08919	8.64997	21	0.411903
CHEMBL2019026	S(Cc1ncccc1)c1[nH]c2c(n1)cc(N)cc2	50	2.22	4.30103	2.08103	6.07986	11	0.33777
CHEMBL467720	Clc1cc(Cl)ccc1COc1ccc(Cl)cc1Cc1nc(ccc1)C(=O)[O-].[Na+]	32	2.42	4.49485	2.07485	6.35384	22	0.226923
CHEMBL452101	Oc1ccc(cc1)\C=C\1/CC\C(=C\c2ccc(O)cc2)\C/1=O	45.6	2.28	4.34104	2.06104	6.13641	22	0.278928
CHEMBL2070155	S(=O)(=O)(CC)c1cc2nc([nH]c2cc1)-c1nccc(c1)-c1ccccc1	1.6	3.74	5.79588	2.05588	8.19295	26	0.315113
CHEMBL2170754	s1c2cc(O)ccc2nc1C(=O)c1cc(O)c(cc1)C	0.57	4.19	6.24413	2.05413	8.82658	20	0.441329
CHEMBL2018911	S(CC1CC1)c1[nH]c2c(n1)cc(OC)cc2	0.95	3.98	6.02228	2.04228	8.51298	16	0.532061
CHEMBL1172744	O(C[C@]12C[C@]1(CCNC2)c1cc2c(cc1)cccc2)C	8	3.06	5.09691	2.03691	7.2049	20	0.360245
CHEMBL3261480	Clc1cc2c3n(cc(c3c1)C)CCN([C@H]1C3CCN(C1)CC3)C2=O	8.8	3.02	5.05552	2.03552	7.14639	24	0.297766
CHEMBL3298273	Fc1cc(ccc1)COc1nc2c(cc1)C(=O)NCC2	25.7	2.56	4.59007	2.03007	6.48843	20	0.324422
CHEMBL3217883	FC(F)(F)c1c2c(nc(c1)C(F)(F)F)n(nc2C)-c1ccccc1	0.22909	4.61	6.63999	2.02999	9.38617	24	0.39109
CHEMBL348263	O(CCCC)c1ccc(N\C=N/O)cc1	9.98	3	5.00087	2.00087	7.06914	15	0.471276
CHEMBL2326719	FC(F)(F)c1cnc(nc1NC)Nc1cnn(C(C)C)c1C	3.1	3.51	5.50864	1.99864	7.78691	22	0.35395
CHEMBL1223034	Brc1ccc(cc1)-c1n(nc(-c2sc(nn2)C(C)(C)C)c1Cn1ncnc1)-c1ccc(Cl)cc1Cl	0.0027	6.57	8.56864	1.99864	12.1125	35	0.34607
CHEMBL195965	n1ccccc1C#CC1CCCCC1	2.779	3.56	5.55611	1.99611	7.85402	14	0.561001
CHEMBL2019022	S(Cc1ncccc1)c1[nH]c2c(n1)cc(OC)cc2	8.56	3.08	5.06753	1.98753	7.16336	19	0.377019
CHEMBL3132926	O(C)c1cc(OC)ccc1\C=C\c1cc(OC)c(OC)cc1	0.337	4.5	6.47237	1.97237	9.14922	22	0.415874
CHEMBL2170750	s1c2cc(O)ccc2nc1C(=O)c1cc(O)c(F)cc1	1.8	3.78	5.74473	1.96473	8.12064	20	0.406032
CHEMBL150653	O(CCCC)c1ccc(cc1)-c1ncccc1	0.487	4.35	6.31247	1.96247	8.92319	17	0.524894
CHEMBL2018905	S(CCC)c1[nH]c2c(n1)cc(OC)cc2	0.93	4.07	6.03152	1.96152	8.52604	15	0.568403
CHEMBL231409	Clc1cc(ccc1)C(O)CNC=1C=CNC(=O)C=1c1[nH]c2c(n1)c(cc(c2)C(=O)NC)C	21	2.72	4.67778	1.95778	6.61242	23	0.206638
CHEMBL2070138	S(=O)(=O)(CCC)c1cc2nc([nH]c2cc1)-c1ccccc1	2.9	3.58	5.5376	1.9576	7.82785	21	0.372755
CHEMBL42427	O(C)c1cc(OC)ccc1NC(=O)c1cc(OC)cc(OC)c1	64	2.24	4.19382	1.95382	5.92831	23	0.257752
CHEMBL1098230	S(CCc1nc[nH]c1)c1ccc(cc1)C(C)(C)C	0.68	4.22	6.16749	1.94749	8.71825	18	0.484347
CHEMBL253346	c1c2c(c3c(cc2)cccc3)ccc1C#CC	0.06	5.29	7.22185	1.93185	10.2087	29	0.60051
CHEMBL2070142	S(=O)(=O)(CCC)c1cc2nc([nH]c2cc1)-c1cc(ccc1)C(F)(F)F	0.4	4.47	6.39794	1.92794	9.04401	27	0.36176
CHEMBL3094202	O(Cc1nc2c(cc1)cccc2)c1cc2n(cnc2cc1)-c1ccncc1	0.8	4.17	6.09691	1.92691	8.61848	27	0.319203
CHEMBL404678	O=C/1/C(/CCC\C\1=C\c1ccc(N(C)C)cc1)=C/c1ccc(N(C)C)cc1	2.6	3.66	5.58503	1.92503	7.89489	27	0.292403
CHEMBL3132932	O(C)c1cccc(OC)c1\C=C\c1ccc(OC)cc1OC	0.17	4.85	6.76955	1.91955	9.56931	22	0.434969
CHEMBL2347754	O1c2c(c3OCC=Cc3cc2)C(=O)C=C1c1ccccc1	1.13	4.03	5.94692	1.91692	8.40646	21	0.400308
CHEMBL493001	O(C)c1cc(cc(OC)c1O)\C=C\C(=O)\C=C\c1cc(OC)c(O)c(OC)c1	75.2	2.21	4.12378	1.91378	5.8293	28	0.208189
CHEMBL3217885	O1c2c(ccc3c2cccc3)C(C(C#N)=C1N)c1cc2OCCc2cc1	0.112	5.05	6.95078	1.90078	9.8255	26	0.377904
CHEMBL3217884	Clc1cc(Cl)cc(Cl)c1OCc1cc(ccc1OC)C=O	0.05623	5.35	7.25003	1.90003	10.2485	21	0.488024
CHEMBL43741	O(C)c1c(OC)cc(cc1OC)\C=C\c1cc(OC)cc(OC)c1	0.93	4.14	6.03152	1.89152	8.52604	24	0.355252
CHEMBL3220149	O(C)c1cc(OC)cc(OC)c1\C=C\c1ccc(OC)cc1OC	0.188	4.84	6.72584	1.88584	9.50753	24	0.396147
CHEMBL2113099	O=C1N(C2C=C(CCC2)C#Cc2ncccc2)C(=O)c2c1cccc2	5.249	3.41	5.27992	1.86992	7.4636	25	0.298544
CHEMBL194931	n1c2c(ccc1C)cccc2	40	2.53	4.39794	1.86794	6.21685	11	0.565168
CHEMBL631	O(CC(O)CNCCC)c1ccccc1C(=O)CCc1ccccc1	3.292	3.64	5.48254	1.84254	7.75002	25	0.310001
CHEMBL3220145	O(C)c1cc(OC)ccc1\C=C\c1ccc(OC)cc1OC	0.204	4.85	6.69037	1.84037	9.45738	22	0.429881
CHEMBL242273	O1c2cc(ccc2OC1)CC=C	10	3.18	5	1.82	7.06791	12	0.588992
CHEMBL1173532	Clc1cc(ccc1Cl)[C@@]12C[C@@]1(CNCC2)COC	10	3.19	5	1.81	7.06791	18	0.392662
CHEMBL457640	Clc1cc(cc2c1NC(=O)CC2)-c1cccnc1	30.6	2.72	4.51428	1.79428	6.3813	18	0.354517
CHEMBL1288288	Cl.Fc1cc(Cn2c3c(N(CC)C(=O)N(C)C3=O)cc2N2C[C@@](N)(CCC2)C)c(cc1)C#N	26.8	2.78	4.57187	1.79187	6.4627	33	0.19584
CHEMBL294199	O(C)c1cc(ccc1O)CNC(=O)CCCC\C=C\C(C)C	3	3.75	5.52288	1.77288	7.80704	21	0.354865
CHEMBL2205775	O(C(=O)C(C(n1ncnc1)c1ccc(Nc2ccccc2)cc1)(C)C)C	8.5	3.3	5.07058	1.77058	7.16768	26	0.27568
CHEMBL1210552	S(CCCN1CC2(C(C2)C1)c1ccc(S(F)(F)(F)(F)F)cc1)c1nnc(n1C)-c1ocnc1C	8	3.33	5.09691	1.76691	7.2049	23	0.211909
CHEMBL1649672	FC(F)(F)c1nn(c2c1CCCC2)-c1ccc(cc1)CNC(=O)CC	3.5	3.69	5.45593	1.76593	7.7124	25	0.308496
CHEMBL433737	o1nc(cc1)-c1ccc(OCCCC)cc1	2.55	3.83	5.59346	1.76346	7.90681	16	0.494176
CHEMBL478851	O1CCC(CC1=O)CCCCC	72	2.39	4.14267	1.75267	5.856	12	0.488
CHEMBL85960	Brc1cc2c(N=C3N(CCc4c3[nH]c3c4cccc3)C2=O)cc1	1.501	4.08	5.82362	1.74362	8.23216	23	0.35792
CHEMBL128729	O(C)c1cc(ccc1O)\C=C\C(=O)\C=C\c1cc(OC)c(O)cc1	41.5	2.64	4.38195	1.74195	6.19425	24	0.258094
CHEMBL2070157	S(=O)(=O)(CC)c1cc2nc([nH]c2cc1)-c1cc(ncc1)-c1ccccc1	3.4	3.74	5.46852	1.72852	7.7302	20	0.297315
CHEMBL425819	Clc1cc(ccc1)C(O)CNC=1C=CNC(=O)C=1c1[nH]c2c(n1)c(cc(c2)C(NC)=N)C	25	2.89	4.60206	1.71206	6.50539	24	0.203293
CHEMBL593763	Clc1cc(ccc1)COc1cc2OC(=O)C=C(c2cc1)CNC.S(O)(=O)(=O)C	5	3.59	5.30103	1.71103	7.49344	28	0.267623
CHEMBL222460	Clc1cc(C=2c3cc(ccc3NC(=O)C=2CCO)C(F)(F)F)c(O)cc1	30	2.82	4.52288	1.70288	6.39346	26	0.245902
CHEMBL1083208	s1cc(cc1)-c1cc2[nH]nc(NC(=O)CCC)c2cc1	1.9	4.02	5.72125	1.70125	8.08745	20	0.404372
CHEMBL389408	Clc1cc(Nc2nc(C(F)(F)F)c(cn2)C(=O)NCC2CCOCC2)ccc1Cl	8	3.41	5.09691	1.68691	7.2049	26	0.248445
CHEMBL26260	O1c2c(c3c(cc2)cccc3)C(=O)C=C1c1ccccc1	0.47	4.65	6.3279	1.6779	8.945	21	0.425953
CHEMBL2018924	S(Cc1nc2c(cc1)cccc2)c1[nH]c2c(n1)cc(OC)cc2	0.73	4.46	6.13668	1.67668	8.67469	23	0.377161
CHEMBL2070156	S(=O)(=O)(CC)c1cc2nc([nH]c2cc1)-c1cc(cnc1)-c1ccccc1	6.3	3.53	5.20066	1.67066	7.35156	26	0.282752
CHEMBL3220144	O(C)c1cc(OC)ccc1\C=C\c1cc(OC)ccc1OC	0.302	4.85	6.51999	1.66999	9.21654	22	0.418934
CHEMBL150681	o1nccc1-c1ccc(OCCCC)cc1	3.23	3.83	5.4908	1.6608	7.76169	16	0.485106
CHEMBL3219852	O(C)c1cc(OC)ccc1\C=C\c1ccccc1	0.326	4.84	6.48678	1.64678	9.16959	18	0.509422
CHEMBL195857	O(C)c1cc2c(cc1)cccc2	13	3.24	4.88606	1.64606	6.90684	12	0.57557
CHEMBL225464	Clc1cc(Nc2nc(C(F)(F)F)c(cn2)C(=O)NCC2CCOCC2)c(F)cc1	26	2.96	4.58503	1.62503	6.48131	22	0.223493
CHEMBL231620	Clc1cc(ccc1)C(O)CNC=1C=CNC(=O)C=1c1[nH]c2c(n1)c(cc(c2)-c1[nH]c(cn1)C)C	5.8	3.66	5.23657	1.57657	7.40232	21	0.217715
CHEMBL2018903	S(CCCC)c1[nH]c2c(n1)cc(OC)cc2	0.71	4.6	6.14874	1.54874	8.69175	16	0.543234
CHEMBL195217	Oc1cc(ccc1)-c1cc2c(cc(O)cc2)cc1	3.99	3.87	5.39903	1.52903	7.63196	18	0.423998
CHEMBL2018909	S(CC(C)C)c1[nH]c2c(n1)cc(OC)cc2	1.02	4.47	5.9914	1.5214	8.46933	16	0.529333
CHEMBL1381098	S=C=Nc1c2c(ccc1)cccc2	1	4.48	6	1.52	8.48149	28	0.652422
CHEMBL964	S(SC(=S)N(CC)CC)C(=S)N(CC)CC	4	3.88	5.39794	1.51794	7.63043	23	0.476902
CHEMBL1243367	S(CC(c1ccncc1)c1nc[nH]c1)c1ccc(cc1)C(F)(F)F	8.6	3.55	5.0655	1.5155	7.1605	24	0.298354
CHEMBL578588	O1OC2(CC1(CC(=O)NCc1ccc(N(C)C)cc1)C)CCCCC2	3.8	3.95	5.42022	1.47022	7.66192	25	0.306477
CHEMBL2070137	S(=O)(=O)(CC)c1cc2nc([nH]c2cc1)-c1cc(ccc1)-c1ccccc1	0.4	4.94	6.39794	1.45794	9.04401	27	0.347847
CHEMBL116438	O(C)c1cc(ccc1O)\C=C\C(=O)\C=C(\O)/C=C/c1cc(OC)c(O)cc1	40	2.94	4.39794	1.45794	6.21685	21	0.230254
CHEMBL195827	O1C(CCC1=O)CCCCCCC	45	2.89	4.34679	1.45679	6.14454	13	0.472657
CHEMBL1173087	Clc1cc(ccc1Cl)[C@@]12C[C@]1(CNCC2)C(OC)CC=C	3	4.07	5.52288	1.45288	7.80704	22	0.371764
CHEMBL2018914	S(CCCC(O)=O)c1[nH]c2c(n1)cc(OC)cc2	50	2.86	4.30103	1.44103	6.07986	18	0.33777
CHEMBL808	Clc1cc(Cl)ccc1C(OCc1ccc(Cl)cc1)Cn1ccnc1	0.3	5.1	6.52288	1.42288	9.22062	24	0.384192
CHEMBL3298322	Fc1ccc(Oc2nccc3c2cc(OC)c(OC)c3)cc1	1.9	4.3	5.72125	1.42125	8.08745	22	0.367611
CHEMBL1726	O(C(=O)C=1C(C(C(OC)=O)=C(NC=1C)C)c1ccccc1[N+](=O)[O-])CC(C)C	1	4.58	6	1.42	8.48149	32	0.30291
CHEMBL1800911	O=C1Nc2c(ccc(c2)-c2cc(ccc2C)C(=O)NC2CC2)C12CCCC2	10	3.59	5	1.41	7.06791	26	0.261774
CHEMBL2164048	O=C(Nc1ccccc1N1CCCC1)[C@@H](CC)c1ccccc1	6.1	3.82	5.21467	1.39467	7.37136	21	0.320494
CHEMBL2022739	Fc1cc(NC(=O)c2ccccc2F)ccc1-c1oc(nn1)NCCCCN1CCOCC1	48	2.93	4.31876	1.38876	6.10492	33	0.184997
CHEMBL151354	s1nccc1-c1ccc(OCCCC)cc1	1.26	4.53	5.89963	1.36963	8.33961	16	0.521225
CHEMBL238146	O=C(N)C=1C=C(NCc2c(cccc2C)CC)c2n(C=1)c(C)c(n2)C	4.3	4	5.36653	1.36653	7.58603	25	0.303441
CHEMBL2431173	Fc1cc(ccc1)C#Cc1ccc(nc1)C(=O)NC1(COC1)C	5.3	3.91	5.27572	1.36572	7.45767	23	0.324246
CHEMBL1076536	O(Cc1c(cccc1C)C)C=1c2n(C=CC=1)c(C)c(n2)C	0.7	4.79	6.1549	1.3649	8.70045	27	0.414307
CHEMBL292759	Brc1ccc(S(=O)(=O)Nc2cc(N3CCN(CC3)C)c(OC)cc2)cc1	10	3.64	5	1.36	7.06791	27	0.271843
CHEMBL517933	Fc1cccc(F)c1C(=O)N(CC(O)(CNC(=O)c1cnn(c1N)-c1ccc(F)cc1)C(F)(F)F)CCO	100	2.64	4	1.36	5.65433	28	0.148798
CHEMBL2043279	O(C)c1cc(OC)ccc1\C=C\c1ccccc1OC	0.792	4.76	6.10128	1.34127	8.62465	20	0.431232
CHEMBL728	Clc1cc2N(c3c(Sc2cc1)cccc3)CCCN1CCN(CC1)C	2	4.38	5.69897	1.31897	8.05596	25	0.322238
CHEMBL496606	n12c(nc(C)c1C)C(NCc1c(cccc1C)C)=CC(n1ncnc1)=C2	13	3.57	4.88606	1.31606	6.90684	26	0.265648
CHEMBL1272135	Clc1cccc(F)c1CN1C=CC=C(NC(=O)Nc2cc(OC)ccc2)C1=O	5.7	3.93	5.24413	1.31413	7.413	28	0.26475
CHEMBL513130	o1nc(nc1-c1nn(c2c1cccc2)Cc1cc2OCOc2cc1)CNC(OC(C)(C)C)=O	4.86	4.01	5.31336	1.30336	7.51087	33	0.227602
CHEMBL149750	O(CCCC)c1ccc(cc1)-c1n[nH]cc1	5.65	3.96	5.24795	1.28795	7.41841	16	0.46365
CHEMBL230205	O=C1NC=CC(N[C@@H](Cc2ccccc2)CO)=C1c1[nH]c2c(n1)c(cc(c2)-c1ccccc1)C	0.58	4.95	6.23657	1.28657	8.8159	34	0.259291
CHEMBL3220143	O(C)c1cc(OC)ccc1\C=C\c1cc(OC)ccc1	0.903	4.76	6.04431	1.28431	8.54413	20	0.427206
CHEMBL31184	c12c3c4ccc1c1c(cc2ccc3ccc4)cccc1	0.04	6.12	7.39794	1.27794	10.4576	20	0.52288
CHEMBL274993	O=C/1/C(/CCC\C\1=C/c1ccccc1)=C\c1ccccc1	0.9	4.77	6.04576	1.27576	8.54617	21	0.40696
CHEMBL520276	Clc1cccnc1C(=O)N(CC(O)(CNC(=O)c1cnn(c1N)-c1ccc(F)cc1)C(F)(F)F)CC	100	2.73	4	1.27	5.65433	32	0.157065
CHEMBL3220150	O(C)c1c(\C=C\c2ccc(OC)cc2OC)c(OC)ccc1OC	1.74	4.49	5.75945	1.26945	8.14145	24	0.339227
CHEMBL2070153	S(=O)(=O)(CC)c1cc2nc([nH]c2cc1)-c1cc(ccc1C)-c1ccccc1	0.4	5.14	6.39794	1.25794	9.04401	28	0.334963
CHEMBL2018904	S(CCCCC)c1[nH]c2c(n1)cc(OC)cc2	0.44	5.12	6.35655	1.23655	8.9855	18	0.528559
CHEMBL1288289	Cl.Clc1ccc(F)cc1Cn1c2c(N(CC(=O)N(C)C)C(=O)N(C)C2=O)cc1N1C[C@@](N)(CCC1)C	26.3	3.35	4.58004	1.23004	6.47427	36	0.179841
CHEMBL1081505	n1c2c(n(C)c1C)cccc2NCc1c(cccc1C)C	2.1	4.45	5.67778	1.22778	8.026	22	0.382191
CHEMBL242396	O(C)c1cc(OC)ccc1\C=C\c1ccc(OC)cc1	1.06	4.76	5.97469	1.21469	8.44572	20	0.422286
CHEMBL1766005	O(C(=O)C(C(n1ccnc1)c1ccc(Nc2cc3c(cc2)cccc3)cc1)(C)C)C	1.2	4.73	5.92082	1.19082	8.36956	25	0.278985
CHEMBL3220147	O(C)c1c(OC)cc(cc1OC)\C=C\c1ccc(OC)cc1OC	4.69	4.14	5.32883	1.18883	7.53273	24	0.313864
CHEMBL496806	O=C1NC(=O)NC=C1C=1C=C(NCc2c(cccc2C)C)c2n(C=1)c(C)c(n2)C	26	3.41	4.58503	1.17503	6.48131	22	0.223493
CHEMBL17201	O=C(\C=C\c1ccccc1)\C=C\c1ccccc1	3.7	4.28	5.4318	1.1518	7.67829	27	0.426572
CHEMBL3132928	O(C)c1cccc(OC)c1\C=C\c1cc(OC)c(OC)cc1	2.31	4.5	5.63639	1.13639	7.96749	22	0.362159
CHEMBL362076	c12c(cccc1)c(ccc2C)C	3.6	4.31	5.4437	1.1337	7.69511	12	0.641259
CHEMBL401930	Clc1cc(ccc1)[C@@H](O)CNC=1C=CNC(=O)C=1c1[nH]c2c(n1)c(cc(N1CCOCC1)c2)C	34	3.34	4.46852	1.12852	6.31662	22	0.185783
CHEMBL486598	O=C1N2[C@@H](N(c3c1cccc3)C)c1[nH]c3c(c1CC2)cccc3	16.3	3.66	4.78781	1.12781	6.76796	23	0.294259
CHEMBL358214	O(CCCC)c1ccc(-n2ccnc2C)cc1	8.12	3.98	5.09044	1.11044	7.19576	17	0.42328
CHEMBL14726	FC(F)(F)c1cc2N(CCc2cc1OC)C(=O)Nc1ccc(Oc2cccnc2)nc1	4	4.32	5.39794	1.07794	7.63043	23	0.246143
CHEMBL3115191	s1cncc1COC(=O)N[C@@H](Cc1ccccc1)CC[C@@H](NC(=O)[C@@H](NC(=O)N(Cc1nc(sc1)C(C)C)C)Cc1nc[nH]c1)Cc1ccccc1	15	3.75	4.82391	1.07391	6.81899	26	0.131134
CHEMBL3132924	O(C)c1ccccc1\C=C\c1cc(OC)c(OC)cc1	3.32	4.41	5.47886	1.06886	7.74482	20	0.387241
CHEMBL2178221	Clc1ccc(NC(=O)[C@H]2CN(C[C@@H]2c2ccc(cc2)\C=C\C(=O)Nc2ccccc2N)CCO)cc1	26	3.52	4.58503	1.06503	6.48131	27	0.180036
CHEMBL359116	O(CCCC)c1ccc(cc1)-c1cc[nH]c1	5.85	4.17	5.23284	1.06284	7.39705	16	0.462316
CHEMBL464907	Fc1cccc(F)c1C(=O)N(CC(O)(CNC(=O)c1cnn(c1N)-c1ccc(F)cc1)C(F)(F)F)C	100	2.94	4	1.06	5.65433	36	0.157065
CHEMBL225413	Clc1cccc(Nc2nc(C(F)(F)F)c(cn2)C(=O)NCC2CCOCC2)c1F	99	2.96	4.00436	1.04436	5.6605	29	0.19519
CHEMBL2070143	S(=O)(=O)(CCC)c1cc2nc([nH]c2cc1)-c1cc(OC(F)(F)F)ccc1	1.9	4.7	5.72125	1.02125	8.08745	26	0.311056
CHEMBL276571	FC(F)(F)c1cc2N(CCc2cc1OC)C(=O)Nc1cc(-c2cccnc2)c(OC)cc1	3	4.51	5.52288	1.01288	7.80704	23	0.24397
CHEMBL1649666	FC(F)(F)c1nn(c2c1CCCC2)-c1ccc(cc1)C(C(=O)N1CCCC1)C	6	4.21	5.22185	1.01185	7.38151	28	0.263625
CHEMBL2347919	O1c2c(c3c(cc2)cccc3)C(=O)C=C1c1ccc(OCC#C)cc1	0.6	5.22	6.22185	1.00185	8.79509	24	0.351804
CHEMBL382541	c12c(ccc(C)c1C)cccc2	5.5	4.26	5.25964	0.999637	7.43493	28	0.619577
CHEMBL227899	Clc1cc(Nc2nc(C(F)(F)F)c(cn2)C(=O)NCC2CCC2)ccc1	8	4.1	5.09691	0.99691	7.2049	29	0.277111
CHEMBL500394	O(C)c1cc2c(cc(cc2)-c2c3c(cccc3)cnc2)cc1	1.619	4.8	5.79075	0.990753	8.1857	22	0.372077
CHEMBL2070150	Clc1ccc(cc1-c1[nH]c2c(n1)cc(S(=O)(=O)CC)cc2)-c1ccccc1	0.4	5.41	6.39794	0.98794	9.04401	29	0.334963
CHEMBL1091082	Clc1cc2[nH]nc(NC(=O)CCC)c2cc1-c1ccc(F)cc1	0.83	5.1	6.08092	0.980922	8.59588	23	0.373734
CHEMBL2204469	Fc1cc(F)ccc1CN1N=C(C=CC1=O)Cc1c2cc(F)ccc2n(CC(O)=O)c1C	16	3.82	4.79588	0.97588	6.77937	22	0.211855
CHEMBL152968	s1c2c(nc1C)cc(OC[C@H](O)CN1CCN(CC1)CC(=O)Nc1cc(ccc1)-c1ccccc1)cc2	6	4.28	5.22185	0.941849	7.38151	32	0.1995
CHEMBL387620	Clc1cc(Nc2nc(C(F)(F)F)c(cn2)C(=O)NCC2(O)CCCCC2)ccc1	11	4.03	4.95861	0.928607	7.0094	29	0.241703
CHEMBL150999	O(CCCC)c1ccc(cc1)-c1[nH]ccn1	25.5	3.68	4.59346	0.91346	6.49323	16	0.405827
CHEMBL2347337	O(C(=O)N[C@@H](C(C)C)C(=O)N1CCC[C@H]1c1[nH]c(cn1)-c1ccc(cc1)-c1ccc(cc1)CO)C	56.7	3.34	4.24642	0.906417	6.00266	35	0.171504
CHEMBL1243335	S(CC(c1ncccc1)c1nc[nH]c1)c1ccc(cc1)C(C)(C)C	5.1	4.39	5.29243	0.90243	7.48128	24	0.31172
CHEMBL191357	Clc1c2c(cccc2)c(Cl)cc1	2.3	4.74	5.63827	0.898272	7.97016	12	0.66418
CHEMBL517438	s1c2c(nc1Nc1ccc(cc1)[C@@H](n1ccnc1)[C@H](N(C)C)C)cccc2	8.3	4.19	5.08092	0.890922	7.1823	27	0.266011
CHEMBL1371125	c12c3c4c5c(c1cccc2ccc3ccc4)cccc5	0.1	6.12	7	0.88	9.89507	28	0.494753
CHEMBL2069560	Clc1cc(F)c(cc1F)-c1nc(cc(n1)NC[C@@H](O)CO)CC	35	3.58	4.45593	0.875932	6.29882	26	0.273862
CHEMBL2069311	Brc1cc(F)c(cc1F)-c1nc(cc(n1)NC[C@@H](O)CO)CC	25	3.73	4.60206	0.87206	6.50539	24	0.282843
CHEMBL1668909	s1c2c(ccnc2)c(Nc2cc3c(cc2)/C(=N/O)/CC3)c1C(OCC)=O	0.616	5.34	6.21042	0.870419	8.77893	26	0.337651
CHEMBL2070146	S(=O)(=O)(CC)c1cc2nc([nH]c2cc1)-c1cccc(-c2ccccc2)c1F	1.1	5.09	5.95861	0.868607	8.42298	27	0.311962
CHEMBL273921	Fc1cc2nc(O)n(c2cc1)C1CCN(CC1)CCN1CCCc2c(cccc2)C1=O	62	3.34	4.20761	0.867608	5.9478	31	0.191864
CHEMBL3094298	O(Cc1nc2c(cc1)cccc2)c1cc2n(cnc2cc1)-c1ccccc1	0.38	5.57	6.42022	0.850216	9.0755	28	0.33613
CHEMBL191864	Fc1cc2c(cc1)cccc2	49	3.46	4.3098	0.849804	6.09226	11	0.553842
CHEMBL1087758	Fc1ccc(cc1)COc1nncc2c1n(C[C@H]1C[C@@H]1C)c(C)c2C	1.2	5.08	5.92082	0.840819	8.36956	30	0.334782
CHEMBL2178223	Clc1ccc(NC(=O)[C@H]2CN(C[C@@H]2c2ccc(cc2)\C=C\C(=O)Nc2ccccc2N)CC(O)(C)C)cc1	7	4.32	5.1549	0.834902	7.28687	22	0.19176
CHEMBL2013195	Oc1ccc2[nH]c(nc2c1CN1CCCCC1)-c1ccccc1	3	4.69	5.52288	0.832879	7.80704	27	0.339436
CHEMBL189942	Fc1nc2N(c3ncc(cc3C(=O)N(c2cc1)C)CCOc1ccc(cc1C)C(O)=O)CC	19	3.9	4.72125	0.821246	6.67387	12	0.202238
CHEMBL195215	O1C(CCC1=O)CCCCCCCC	58	3.42	4.23657	0.816572	5.98874	14	0.427767
CHEMBL373024	c12cc(ccc1cccc2C)C	7.5	4.31	5.12494	0.814939	7.24452	12	0.60371
CHEMBL1821837	Fc1cc(F)cnc1Cn1c2c(nc1)cc(cc2)C(=O)N[C@@H](CC)c1ccccc1	14	4.04	4.85387	0.813872	6.86134	12	0.228711
CHEMBL464245	Fc1cccc(F)c1C(=O)N(CC(O)(CNC(=O)c1cnn(c1N)-c1ccc(F)cc1)C(F)(F)F)CCF	100	3.19	4	0.81	5.65433	36	0.148798
CHEMBL231609	Clc1cc(ccc1)C(O)CNC=1C=CNC(=O)C=1c1[nH]c2c(n1)c(cc(c2)C(=O)NC1CCCC1)C	9.8	4.2	5.00877	0.808774	7.08031	36	0.196675
CHEMBL523752	n12c(nc(C)c1C)C(NCc1c(cccc1C)CC)=CC=C2	1.5	5.03	5.82391	0.793909	8.23257	26	0.374208
CHEMBL370524	c1c(c2c(cc1C)cccc2)C	7.9	4.31	5.10237	0.792373	7.21262	12	0.601052
CHEMBL2018916	S(Cc1ccc(cc1)C)c1[nH]c2c(n1)cc(OC)cc2	1.39	5.08	5.85699	0.776985	8.27933	20	0.413966
CHEMBL2019025	S(Cc1ncccc1)c1[nH]c2c(n1)cc(OC(F)F)cc2	50	3.53	4.30103	0.77103	6.07986	18	0.289517
CHEMBL317935	O1CCN(CC1)c1cc(ccc1)[C@@H](NC(=O)\C=C\c1ccccc1)C	78	3.34	4.10791	0.767905	5.80686	25	0.232274
CHEMBL2018907	S(CCCCCC)c1[nH]c2c(n1)cc(OC)cc2	0.39	5.65	6.40894	0.758935	9.05955	18	0.503308
CHEMBL1650654	Oc1ccc2c(ccc(c2)-c2cc(O)ccc2)c1-c1cc(N)ccc1	10.45	4.23	4.98088	0.750884	7.04088	25	0.281635
CHEMBL422858	o1nc(cc1-c1ccc(OCCCC)cc1)C	14.2	4.1	4.84771	0.747712	6.85263	17	0.403096
CHEMBL2018919	Clc1ccc(cc1)CSc1[nH]c2c(n1)cc(OC)cc2	0.95	5.29	6.02228	0.732276	8.51298	20	0.425649
CHEMBL327223	O(C)c1cc(ccc1OC)\C=C\c1ccccc1	6.04	4.49	5.21896	0.728963	7.37743	18	0.409857
CHEMBL231510	Clc1cc(ccc1)C(O)CNC=1C=CNC(=O)C=1c1[nH]c2c(n1)c(cc(c2)C(=O)NC1CC1)C	93	3.31	4.03152	0.721517	5.69888	34	0.167614
CHEMBL277111	FC(F)(F)c1cc2N(CCc2cc1OC)C(=O)Nc1ccc(nc1)-c1cccnc1	7	4.44	5.1549	0.714902	7.28687	22	0.242896
CHEMBL1082158	Clc1ccc(cc1Nc1nncc2n(ncc12)-c1c(F)cccc1F)C(=O)NC1CC1	5.4	4.57	5.26761	0.697606	7.44619	31	0.2402
CHEMBL2019023	S(Cc1ncccc1)c1[nH]c2c(n1)cc(OCC)cc2	50	3.61	4.30103	0.69103	6.07986	20	0.303993
CHEMBL1081870	n1c2c(n(C)c1C)ccnc2NCc1c(cccc1C)C	31	3.83	4.50864	0.678638	6.37333	21	0.303492
CHEMBL1760205	Clc1ccc(cc1)-c1nn(C)c(c1)C(=O)N1CCN(CC1)c1ccccc1OC	21	4	4.67778	0.677781	6.61242	25	0.228015
CHEMBL46909	O(C)c1cc(OC)ccc1\C=C\c1cc(OC)cc(OC)c1	3.1	4.85	5.50864	0.658638	7.78691	22	0.35395
CHEMBL2018920	Brc1ccc(cc1)CSc1[nH]c2c(n1)cc(OC)cc2	0.81	5.44	6.09152	0.651515	8.61085	20	0.430543
CHEMBL1091081	Clc1cc2[nH]nc(NC(=O)CCC)c2cc1-c1ccc([N+](=O)[O-])cc1	4.46	4.7	5.35067	0.650665	7.5636	25	0.302544
CHEMBL3132925	O(C)c1c(cccc1OC)\C=C\c1cc(OC)c(OC)cc1	16.02	4.15	4.79534	0.645337	6.7786	22	0.308118
CHEMBL3092130	s1cc(nc1-n1nc(-c2ccccc2)c(N)c1-c1ccccc1)C(O)=O	7.1	4.52	5.14874	0.628742	7.27817	26	0.279929
CHEMBL146826	Clc1cc2nccc(Nc3cc(O)c(cc3)CNCC)c2cc1	8	4.47	5.09691	0.62691	7.2049	29	0.313256
CHEMBL480398	Brc1cc(Nc2ncc(C(=O)NCC3CCOCC3)c(c2)C2CC2)ccc1	23	4.07	4.63827	0.568272	6.55658	18	0.242836
CHEMBL2171124	FC(F)(F)c1cc(ccc1)CC(=O)N1CCc2cc(ccc12)-c1c2c(ncnc2N)n(c1)C	21	4.11	4.67778	0.567781	6.61242	29	0.200376
CHEMBL2070147	S(=O)(=O)(CC)c1cc2nc([nH]c2cc1)-c1cc(ccc1F)-c1ccccc1	2.2	5.09	5.65758	0.567577	7.99745	27	0.296202
CHEMBL567911	Clc1cc(Nc2ncc(c3c2[nH]cc3C)C(=O)N2CCOCC2)ccc1	28	3.99	4.55284	0.562842	6.43581	23	0.247531
CHEMBL1631540	O=C1NCCN1c1cc(ccc1)CCN1CCN(CC1)c1c2c(nc(cc2)C)ccc1	96	3.48	4.01773	0.537729	5.67939	31	0.183206
CHEMBL2407899	O=C/1Nc2c(cccc2)\C\1=C/c1cc2[nH]nc(c2cc1)\C=C\c1ccc(nc1)N1CCN(CC1)C	10	4.47	5	0.53	7.06791	34	0.20194
CHEMBL467633	Fc1cccc(F)c1C(=O)N(CC(O)(CNC(=O)c1cnn(c1N)-c1ccc(F)cc1)C(F)(F)F)CC	100	3.47	4	0.53	5.65433	36	0.15282
CHEMBL480219	Fc1cc(NC2CCN(CC2)C(=O)c2nccn2-c2ccc(cc2)CN2C[C@H](N[C@H](C2)C)C)ccc1	74	3.62	4.13077	0.510768	5.83918	36	0.162199
CHEMBL390002	Clc1cc(ccc1)C(O)CNC=1C=CNC(=O)C=1c1[nH]c2c(n1)c(cc(c2)C1=NC(CN1)C)C	10	4.49	5	0.51	7.06791	35	0.20788
CHEMBL417082	FC(F)(F)c1cc2N(CCc2cc1OC)C(=O)Nc1cc(c2OCCc2c1)-c1cccnc1	2	5.2	5.69897	0.49897	8.05596	27	0.24412
CHEMBL1831092	O(C(=O)C(C(n1ncnc1)c1ccc(Nc2cc3c(cc2)cccc3)cc1)(C)C)C	10.9	4.48	4.96257	0.482574	7.015	30	0.233833
CHEMBL503570	Clc1cc(ccc1)\C=C\1/CCC\C(=C\c2cc(Cl)ccc2)\C/1=O	3.4	4.99	5.46852	0.478521	7.7302	23	0.336096
CHEMBL1760206	Clc1ccc(cc1)-c1n(nc(c1)C(=O)N1CCN(CC1)c1ccccc1OC)C	34	4	4.46852	0.468521	6.31662	29	0.217814
CHEMBL74189	S(C)c1ccc(cc1)\C=C\c1cc(OC)c(OC)c(OC)c1	7	4.69	5.1549	0.464902	7.28687	30	0.331222
CHEMBL2010880	[nH]1c2c(nc1-c1ccccc1)c(ccc2)CN1CCCCC1	7	4.69	5.1549	0.464902	7.28687	31	0.331222
CHEMBL14076	FC(F)(F)c1cc2N(CCc2cc1OC)C(=O)Nc1cc(ccc1)-c1cccnc1C	2	5.25	5.69897	0.44897	8.05596	27	0.25987
CHEMBL296411	O(C)c1cc(cc(OC)c1)\C=C\c1ccc(OC)cc1	6.2	4.76	5.20761	0.447608	7.36138	20	0.368069
CHEMBL2010883	Fc1ccc2[nH]c(nc2c1CN1CCCC1)-c1ccccc1	16	4.35	4.79588	0.44588	6.77937	32	0.308153
CHEMBL356594	O(CCCC)c1ccc(cc1)-c1n[nH]c(c1)C	21.1	4.23	4.67572	0.445718	6.60951	17	0.388795
CHEMBL389908	Clc1cc(Nc2nc(C(F)(F)F)c(cn2)C(=O)NCc2ccc(F)cc2)ccc1	8	4.68	5.09691	0.41691	7.2049	31	0.248445
CHEMBL230308	Fc1ccc(cc1)-c1cc(c2nc([nH]c2c1)C=1C(=O)NC=CC=1N[C@@H](Cc1ccccc1)CO)C	3.2	5.09	5.49485	0.40485	7.76742	27	0.221926
CHEMBL488400	S(Cc1cc(OC)cc(OC)c1)c1[nH]c2cc(OC)ccc2n1	10.69	4.58	4.97102	0.391022	7.02694	23	0.305519
CHEMBL18797	S(C)c1ccc(cc1)\C=C\1/c2c(cc(F)cc2)C(CC(O)=O)=C/1C	2	5.31	5.69897	0.38897	8.05596	31	0.335665
CHEMBL370944	c1c2c(ccc1CC)cccc2	19	4.34	4.72125	0.381246	6.67387	26	0.556156
CHEMBL2070148	S(=O)(=O)(CC)c1cc2nc([nH]c2cc1)-c1cc(-c2ccccc2)c(F)cc1	3.4	5.09	5.46852	0.378521	7.7302	26	0.286304
CHEMBL2070149	Clc1c(cccc1-c1[nH]c2c(n1)cc(S(=O)(=O)CC)cc2)-c1ccccc1	3	5.16	5.52288	0.362879	7.80704	30	0.28915
CHEMBL3094308	O(Cc1nc2c(cc1)cccc2)c1cc2n(c(nc2cc1)C)-c1ccccc1	0.63	5.84	6.20066	0.360659	8.76514	26	0.313041
CHEMBL2069316	S(=O)(=O)(CC)c1cc2nc([nH]c2cc1)-c1cc(-c2ccccc2)c(cc1)C	3.2	5.14	5.49485	0.35485	7.76742	35	0.287682
CHEMBL2347323	Brc1nc([nH]c1-c1ccc(N=[N+]=[N-])cc1)[C@H]1N(CCC1)C(=O)[C@@H](NC(OC)=O)C(C)C	80.9	3.74	4.09205	0.352051	5.78445	31	0.186595
CHEMBL14255	FC(F)(F)c1cc2N(CCc2cc1OC)C(=O)Nc1cc(ccc1)-c1cccnc1	4	5.05	5.39794	0.34794	7.63043	26	0.254348
CHEMBL1097694	Clc1cc2[nH]nc(NC(=O)CCC)c2cc1-c1ccc(cc1)C	1.75	5.45	5.75696	0.306962	8.13793	23	0.353823
CHEMBL363803	c12c(cc(cc1)C)cccc2C	25	4.31	4.60206	0.29206	6.50539	29	0.542116
CHEMBL195338	Clc1c2c(ccc1)cccc2	50	4.03	4.30103	0.27103	6.07986	21	0.552714
CHEMBL2070152	S(=O)(=O)(CC)c1cc2nc([nH]c2cc1)-c1cccc(-c2ccccc2)c1C	7.8	4.84	5.10791	0.267905	7.22044	27	0.267424
CHEMBL14548	FC(F)(F)c1cc2N(CCc2cc1OC)C(=O)Nc1cc(ccc1)-c1ncccc1	3	5.26	5.52288	0.262879	7.80704	32	0.260235
CHEMBL43395	O(C)c1cc(cc(OC)c1)\C=C\c1ccc(OC)cc1O	31.1	4.27	4.50724	0.23724	6.37135	21	0.303398
CHEMBL151037	O(CCCC)c1ccc(cc1)-c1n(ncc1)C	69.9	3.92	4.15552	0.235523	5.87417	17	0.345539
CHEMBL153741	s1c2c(nc1C)cc(OC[C@H](O)CN1CCN(CC1)CC(=O)Nc1ccc(cc1)-c1ccccc1)cc2	31	4.28	4.50864	0.228638	6.37333	37	0.172252
CHEMBL151734	O=C/1/C(/CC\C\1=C/c1ccccc1)=C\c1ccccc1	36.6	4.21	4.43652	0.226519	6.27138	20	0.313569
CHEMBL2177582	Clc1ccc(NC(=O)[C@H]2CN(C[C@@H]2c2ccc(cc2F)\C=C\C(=O)Nc2ccccc2N)C)cc1	28	4.33	4.55284	0.222842	6.43581	26	0.18388
CHEMBL465451	Clc1cccc(Cl)c1C(=O)N(CC(O)(CNC(=O)c1cnn(c1N)-c1ccc(F)cc1)C(F)(F)F)CCO	100	3.78	4	0.22	5.65433	37	0.148798
CHEMBL578928	n1c(cc(nc1NCc1ccccc1)NC1CCCCC1)C	3.1	5.29	5.50864	0.218638	7.78691	25	0.35395
CHEMBL1928092	s1c(-c2cc(OC)c(OC)cc2)c(C)c(C#N)c1\N=C\c1ccc(N(CCC#N)C)cc1	11.9	4.72	4.92445	0.204453	6.96112	32	0.217535
CHEMBL1095038	Fc1cc(cc(F)c1)-c1cc2[nH]nc(NC(=O)CCC)c2cc1	13.8	4.66	4.86012	0.200121	6.87018	23	0.298703
CHEMBL43740	Fc1cc(OC)ccc1\C=C\c1cc(OC)cc(OC)c1	5.8	5.04	5.23657	0.196572	7.40232	34	0.352491
CHEMBL2177587	Clc1ccc(NC(=O)[C@H]2CN(C[C@@H]2c2ccc(cc2)\C=C\C(=O)Nc2ccccc2N)C)cc1	42	4.19	4.37675	0.186751	6.18689	12	0.181967
CHEMBL248458	O1CC(=O)N(c2cc(ccc12)CN1CCN(CC1)CCOc1c2c(nc(cc2)C)ccc1)CC	18	4.57	4.74473	0.174728	6.70706	34	0.197266
CHEMBL230043	Clc1cc(ccc1)C(O)CNC=1C=CNC(=O)C=1c1[nH]c2c(n1)c(cc(c2)C=1NCCCN=1)C	20	4.53	4.69897	0.16897	6.64238	28	0.195364
CHEMBL517440	Clc1ccccc1C(=O)N(CC(O)(CNC(=O)c1cnn(c1N)-c1ccc(F)cc1)C(F)(F)F)CC	100	3.87	4	0.13	5.65433	37	0.157065
CHEMBL534942	Cl.Clc1ccccc1CC(N1CCNCC1)c1ccccc1	26	4.46	4.58503	0.125027	6.48131	29	0.294605
CHEMBL502335	S(Cc1cc2c(cc1)cccc2)c1[nH]c2cc(OC)ccc2n1	1.34	5.75	5.8729	0.122895	8.30181	23	0.360949
CHEMBL195820	Clc1c2c(ccc1)c(Cl)ccc2	14	4.74	4.85387	0.113872	6.86134	21	0.571779
CHEMBL2177588	Clc1ccc(NC(=O)[C@@H]2CN(C[C@H]2c2ccc(cc2)\C=C\C(=O)Nc2ccccc2N)C)cc1	50	4.19	4.30103	0.11103	6.07986	22	0.178819
CHEMBL496426	o1cccc1C=1C=C(NCc2c(cccc2C)C)c2n(C=1)c(C)c(n2)C	1.3	5.78	5.88606	0.106057	8.32042	26	0.320016
CHEMBL2070140	S(=O)(=O)(CCC)c1cc2nc([nH]c2cc1)-c1cc(ccc1)-c1ccccc1	2.7	5.47	5.56864	0.0986362	7.87172	27	0.291545
CHEMBL1235	Clc1cc2nccc(Nc3cc(CNCC)c(O)cc3)c2cc1	28	4.47	4.55284	0.082842	6.43581	26	0.279818
CHEMBL14863	FC(F)(F)c1cc2N(CCc2cc1OC)C(=O)Nc1cc(cnc1)-c1ccncc1	50	4.23	4.30103	0.07103	6.07986	23	0.202662
CHEMBL435106	c12c(cccc1C)c(ccc2)C	42	4.31	4.37675	0.0667507	6.18689	34	0.515574
CHEMBL440964	O(C)c1ccc(cc1)-c1cc(c2nc([nH]c2c1)C=1C(=O)NC=CC=1N[C@@H](Cc1ccccc1)CO)C	12	4.87	4.92082	0.0508188	6.95598	36	0.193222
CHEMBL2018921	Ic1ccc(cc1)CSc1[nH]c2c(n1)cc(OC)cc2	1.81	5.7	5.74232	0.0423214	8.11724	20	0.405862
CHEMBL2152524	N1(CCCC1)[C@H]([C@@H](N1CCCC1)c1ccccc1)c1ccccc1	19.9526	4.68	4.7	0.0200001	6.64383	24	0.276826
CHEMBL2152525	N1(CCCC1)[C@@H]([C@H](N1CCCC1)c1ccccc1)c1ccccc1	19.9526	4.68	4.7	0.0200001	6.64383	24	0.276826
CHEMBL1080717	n12c(cc(C)c1C)C(=NC=C2)NCc1c(cccc1C)C	6.1	5.21	5.21467	0.00467017	7.37136	23	0.351017
CHEMBL2018922	S(Cc1ccc(cc1)C(O)=O)c1[nH]c2c(n1)cc(OC)cc2	50	4.32	4.30103	-0.01897	6.07986	30	0.276357
CHEMBL2205045	Cl.S(c1ccccc1N1CCNCC1)c1ccc(cc1)C	40	4.42	4.39794	-0.02206	6.21685	22	0.29604
CHEMBL14652	FC(F)(F)c1cc2N(CCc2cc1OC)C(=O)Nc1cc(cnc1)-c1ccccc1	2.6	5.61	5.58503	-0.0249733	7.89489	30	0.263163
CHEMBL2376577	S(=O)(=O)(Nc1ccc(Oc2ccccc2)cc1C(O)=O)c1ccc(cc1)C	1.8	5.77	5.74473	-0.0252725	8.12064	27	0.300764
CHEMBL194983	c1c2c(cc(cc2)C)ccc1C	52	4.31	4.284	-0.0260033	6.05578	12	0.504648
CHEMBL242983	O(C)c1cc(C(=O)Nc2ccc(N3CCN(CC3)Cc3cc(OC)c(OC)cc3)cc2)c(NC(=O)c2cc3c(nc2)cccc3)cc1OC	6.68	5.22	5.17522	-0.0447765	7.3156	49	0.149298
CHEMBL1221	Clc1cc(Cl)ccc1C(SCc1ccc(Cl)cc1)Cn1ccnc1	0.6	6.27	6.22185	-0.0481513	8.79509	25	0.366462
CHEMBL1209853	Clc1cc(Cl)ccc1C=1n2cc(nc2N=C(C)C=1CN)-c1ccccc1	19	4.77	4.72125	-0.0487536	6.67387	33	0.256687
CHEMBL230042	Clc1cc(ccc1)C(O)CNC=1C=CNC(=O)C=1c1[nH]c2c(n1)c(cc(c2)C1=NC(CN1)(C)C)C	11	5.01	4.95861	-0.0513927	7.0094	32	0.200268
CHEMBL506247	O1[C@H](COC(=O)c2cc(OC(=O)c3cc(O)c(O)c(O)c3)c(O)c(O)c2)[C@@H](OC(=O)c2cc(OC(=O)c3cc(O)c(O)c(O)c3)c(O)c(O)c2)[C@H](OC(=O)c2cc(OC(=O)c3cc(O)c(O)c(O)c3)c(O)c(O)c2)[C@@H](OC(=O)c2cc(OC(=O)c3cc(O)c(O)c(O)c3)c(O)c(O)c2)[C@@H]1OC(=O)c1cc(OC(=O)c2cc(O)c(O)c(O)c2)c(O)c(O)c1	0.919	6.09	6.03668	-0.0533155	8.53335	122	0.0699454
CHEMBL3289803	Clc1cc(ccc1C(O)Cn1c2cc(ccc2nc1N)C(F)(F)F)C(F)(F)F	29.4	4.6	4.53165	-0.0683473	6.40586	28	0.228781
CHEMBL1650652	Oc1ccc2c(ccc(c2)-c2cc(O)ccc2)c1-c1cc(O)ccc1	19.04	4.79	4.72033	-0.0696669	6.67258	25	0.266903
CHEMBL502160	O=C/1/C(/CCC\C\1=C\c1ccc(cc1)C)=C/c1ccc(cc1)C	21	4.75	4.67778	-0.0722193	6.61242	32	0.287497
CHEMBL1952142	FC(F)(F)Oc1cc(-n2nnc3c2nc(NCC2CCNCC2)cc3OC)ccc1	30	4.6	4.52288	-0.0771213	6.39346	30	0.213115
CHEMBL3094306	O(Cc1nc2c(cc1)cccc2)c1cc2n(c(nc2cc1)COC)-c1ccccc1	5.1	5.37	5.29243	-0.0775702	7.48128	30	0.249376
CHEMBL2018908	S(CCCCCCC)c1[nH]c2c(n1)cc(OC)cc2	0.79	6.18	6.10237	-0.0776271	8.6262	23	0.454011
CHEMBL1079436	O1CC(=O)N(CC1)c1nc(NCc2c(cccc2C)C)c2[nH]c(C)c(c2c1)C	35	4.54	4.45593	-0.084068	6.29882	28	0.224958
CHEMBL1076210	[nH]1c2c(ccnc2NCc2c(cccc2C)C)c(C)c1C	14	4.94	4.85387	-0.086128	6.86134	30	0.326731
CHEMBL2018912	S(CC1CCCCC1)c1[nH]c2c(n1)cc(OC)cc2	2.67	5.66	5.57349	-0.0865113	7.87858	19	0.414662
CHEMBL347303	O(CCCC)c1ccc(cc1)-c1[nH][n+](cc1)C	8.65	5.15	5.06298	-0.0870161	7.15694	17	0.420996
CHEMBL2413882	Clc1cc2nccc(Nc3cc(ccc3)C(N3CCCC3)c3nnnn3C(C)(C)C)c2cc1	2.54	5.69	5.59517	-0.0948337	7.90922	33	0.239673
CHEMBL162383	S(Cc1cc2c(nc1)N(c1nc(F)cc(c1NC2=O)C)CC)c1cc(nc(c1)C)C	26	4.68	4.58503	-0.0949733	6.48131	29	0.216044
CHEMBL14606	FC(F)(F)c1cc2N(CCc2cc1OC)C(=O)Nc1cc(-c2cccnc2)c(cc1)C	7	5.25	5.1549	-0.095098	7.28687	31	0.23506
CHEMBL40583	c12CCc3c1c(ccc2C)cc1c3ccc2c1cccc2	0.3	6.62	6.52288	-0.0971213	9.22062	25	0.439077
CHEMBL2071349	S(C)c1ccc(cc1)\C=C\c1cc(OC)cc(OC)c1	5	5.4	5.30103	-0.09897	7.49344	29	0.374672
CHEMBL14345	FC(F)(F)c1cc2N(CCc2cc1OC)C(=O)Nc1cc(cnc1)-c1cccnc1	77	4.23	4.11351	-0.116491	5.81478	30	0.193826
CHEMBL195036	c1c2cc(ccc2ccc1C)C	65	4.31	4.18709	-0.122913	5.91879	12	0.493232
CHEMBL1241737	O1c2c(-n3c(C1)c(nc3)/C(=N/OC)/C)cccc2CCN1CCN(CC1)c1c2c(nc(cc2)C)ccc1	4	5.53	5.39794	-0.13206	7.63043	30	0.206228
CHEMBL593490	o1cc(cc1)-c1ncc(OC[C@@H](N)Cc2c3c([nH]c2)cccc3)cc1-c1cc2c(n[nH]c2C)cc1	50	4.45	4.30103	-0.14897	6.07986	34	0.17371
CHEMBL273345	FC(F)(F)c1cc2N(CCc2cc1OC)C(=O)Nc1cc(ccc1)-c1cnccc1C	8	5.25	5.09691	-0.15309	7.2049	34	0.232416
CHEMBL2442495	s1cc(nc1-n1nc(-c2ccccc2)c(C)c1-c1ccccc1)C(O)=O	7.93	5.26	5.10073	-0.159273	7.21029	26	0.277319
CHEMBL231334	S(=O)(=O)(Nc1cc2CCN(CCc2cc1)C)c1ccc(cc1)CCCC	23	4.8	4.63827	-0.161728	6.55658	25	0.252176
CHEMBL226386	Clc1cc(Nc2nc(C(F)(F)F)c(cn2)C(=O)NCC2CCCC2)ccc1	32	4.66	4.49485	-0.16515	6.35384	27	0.235327
CHEMBL2018917	S(Cc1ccc(cc1)C(C)C)c1[nH]c2c(n1)cc(OC)cc2	1.48	6	5.82974	-0.170262	8.24081	22	0.374582
CHEMBL1818291	O(C(C)(C)C)C(=O)NCC1CCC(CC1)CNC(=O)c1cc(nc2c1cccc2)-c1cc(ccc1)CN	4	5.57	5.39794	-0.17206	7.63043	31	0.206228
CHEMBL2071343	S(C)c1ccc(cc1)\C=C\c1ccccc1OC	7.5	5.31	5.12494	-0.185061	7.24452	18	0.402473
CHEMBL2071352	S(C)c1ccc(cc1)\C=C\c1c(OC)cc(OC)cc1OC	6.5	5.39	5.18709	-0.202913	7.33237	22	0.33329
CHEMBL2071351	S(C)c1ccc(cc1)\C=C\c1cc(OC)c(OC)cc1OC	15	5.04	4.82391	-0.216091	6.81899	33	0.309954
CHEMBL407034	Oc1c(cc(cc1C)\C=C\C(=O)\C=C\c1cc(C)c(O)c(c1)C)C	30.4	4.74	4.51713	-0.222874	6.38533	24	0.266055
CHEMBL497783	Clc1cc(ccc1)\C=C\C(=O)\C=C\c1cc(Cl)ccc1	3.4	5.7	5.46852	-0.231479	7.7302	27	0.38651
CHEMBL248229	O1CC(=O)N(c2cc(ccc12)CN1CCN(CC1)CCOc1c2c(nc(cc2)C)ccc1)CCCC	4	5.63	5.39794	-0.23206	7.63043	36	0.211956
CHEMBL2204357	Cl.S(c1cccc(C)c1C)c1ccccc1N1CCNCC1	24	4.87	4.61979	-0.250211	6.53045	29	0.296839
CHEMBL1076192	n1ccc2n(C)c(cc2c1NCc1c(cccc1C)C)C	41	4.66	4.38722	-0.272784	6.20169	21	0.295318
CHEMBL1834662	Clc1c(NC(=O)N(C)c2ncnc(Nc3cc(ccc3)CN3CCN(CC3)C)c2)c(Cl)c(OC)cc1OC	7	5.43	5.1549	-0.275098	7.28687	38	0.19176
CHEMBL2205054	Cl.S(c1ccccc1N1CCNCC1)c1cc(C)c(cc1)C	26	4.87	4.58503	-0.284973	6.48131	30	0.294605
CHEMBL2018923	S(Cc1cc(ccc1)-c1ccccc1)c1[nH]c2c(n1)cc(OC)cc2	0.67	6.46	6.17393	-0.286075	8.72735	25	0.349094
CHEMBL3127163	s1cc(nc1-n1nc(c2c1cc(cc2)C(F)(F)F)-c1ccccc1)C(O)=O	5.53	5.56	5.25728	-0.302725	7.43159	27	0.275244
CHEMBL2071347	S(C)c1ccc(cc1)\C=C\c1ccc(OC)cc1OC	8.1	5.4	5.09152	-0.308485	7.19727	20	0.359864
CHEMBL24944	Brc1cc(Br)cc(C(=O)Nc2ccc(Br)cc2)c1O	2	6.01	5.69897	-0.31103	8.05596	33	0.423998
CHEMBL469227	Oc1ccc2c(ccc(c2)-c2cc(O)ccc2)c1-c1ccccc1	7.16	5.46	5.14509	-0.314913	7.273	24	0.303042
CHEMBL1076245	O=C1N(CCC1)c1nc(NCc2c(cccc2C)C)c2[nH]c(C)c(c2c1)C	26	4.9	4.58503	-0.314973	6.48131	30	0.240048
CHEMBL1080046	S(=O)(=O)(Nc1cc2CCN(CCc2cc1)Cc1n[nH]cc1)c1ccc(cc1)CCCC	29	4.86	4.5376	-0.322398	6.41427	25	0.206912
CHEMBL2070151	Clc1ccc(cc1-c1ccccc1)-c1[nH]c2c(n1)cc(S(=O)(=O)CC)cc2	8.5	5.41	5.07058	-0.339419	7.16768	27	0.26547
CHEMBL479628	Clc1ccc(Cl)cc1Nc1ncc(C(=O)NCC2CCOCC2)c(c1)C1CC1	53	4.64	4.27572	-0.364276	6.04408	28	0.21586
CHEMBL2071344	S(C)c1ccc(cc1)\C=C\c1cc(OC)ccc1	11.5	5.31	4.9393	-0.370698	6.98211	18	0.387895
CHEMBL453246	n12c(nc(C)c1C)C(NCc1c(cccc1C)C)=CC(n1nccc1)=C2	35	4.84	4.45593	-0.384068	6.29882	28	0.242262
CHEMBL3094304	O(Cc1nc2c(cc1)cccc2)c1cc2n(cnc2cc1OC)-c1ccccc1	7.9	5.49	5.10237	-0.387627	7.21262	29	0.248711
CHEMBL2071346	S(C)c1ccc(cc1)\C=C\c1cccc(OC)c1OC	22	5.05	4.65758	-0.392423	6.58386	20	0.329193
CHEMBL3105228	Clc1ccc(cc1)[C@@]12N(CCN1C(=O)c1cc(F)c(F)cc1)C(=O)c1c2cccc1	25	5	4.60206	-0.39794	6.50539	30	0.216846
CHEMBL542139	Cl.Clc1cc2c(sc(S(=O)(=O)Nc3cc(N4CCNCC4)c(OC)cc3)c2C)cc1	66	4.59	4.18046	-0.409544	5.90941	30	0.19698
CHEMBL2205043	Cl.Clc1ccc(Sc2ccccc2N2CCNCC2)cc1	53	4.69	4.27572	-0.414276	6.04408	34	0.287814
CHEMBL3114722	s1cncc1COC(=O)N[C@@H](Cc1ccccc1)CC[C@@H](NC(=O)[C@@H](NC(=O)N(Cc1nc(sc1)C(C)C)C)C(C)C)Cc1ccccc1	10	5.43	5	-0.43	7.06791	49	0.144243
CHEMBL276334	Clc1ccc(cc1)-c1ccccc1	49	4.74	4.3098	-0.430196	6.09226	13	0.468635
CHEMBL445734	Fc1c(cc(NCC)cc1N1CCCC1=O)C(=O)N[C@@H]([C@H](O)CNCc1cc(ccc1)C(F)(F)F)Cc1ccccc1	75	4.58	4.12494	-0.455061	5.83094	42	0.138832
CHEMBL2018925	S(Cc1cc(Oc2ccccc2)ccc1)c1[nH]c2c(n1)cc(OC)cc2	0.63	6.67	6.20066	-0.469341	8.76514	28	0.337121
CHEMBL213221	Brc1cc(Cn2nc(cc2C)C(O)=O)c(OCc2ccccc2)cc1	21	5.18	4.67778	-0.502219	6.61242	33	0.264497
CHEMBL2204360	Cl.S(c1ccc(cc1C)C)c1ccccc1N1CCNCC1	40	4.92	4.39794	-0.52206	6.21685	27	0.282584
CHEMBL231610	Clc1cc(ccc1)C(O)CNC=1C=CNC(=O)C=1c1[nH]c2c(n1)c(cc(c2)C(=O)NC1CCCCC1)C	59	4.76	4.22915	-0.530852	5.97824	37	0.161574
CHEMBL256092	Clc1cc(Cn2nc(NC(OC(C)C)=O)cc2C)c(OCc2ccccc2)cc1	7.8	5.66	5.10791	-0.552095	7.22044	29	0.248981
CHEMBL2018910	S(CC(C)(C)C)c1[nH]c2c(n1)cc(OC)cc2	49.9	4.86	4.3019	-0.558101	6.08109	17	0.357711
CHEMBL3094309	O(Cc1nc2c(cc1)cccc2)c1cc2n(c(nc2cc1)CC)-c1ccccc1	1.6	6.37	5.79588	-0.57412	8.19295	29	0.282515
CHEMBL196343	S(C1C=C(CCC1)C#Cc1ncccc1)c1cc2c(cc1)cccc2	5.308	5.86	5.27507	-0.584931	7.45674	25	0.29827
CHEMBL1079957	O=C1NCCN1c1nc(NCc2c(cccc2C)C)c2[nH]c(C)c(c2c1)C	22	5.25	4.65758	-0.592423	6.58386	27	0.243847
CHEMBL461012	Clc1cccc(Cl)c1C(=O)N(CC(O)(CNC(=O)c1cnn(c1N)-c1ccc(F)cc1)C(F)(F)F)CC	100	4.61	4	-0.61	5.65433	38	0.15282
CHEMBL408443	Fc1c2cc([nH]c2ccc1OC1=NC=Nn2c1c(C)c(OC[C@H](OC(=O)[C@@H](N)CC(C)C)C)c2)C	34	5.08	4.46852	-0.611479	6.31662	34	0.180475
CHEMBL164261	Clc1nc2N(c3ncc(cc3C(=O)Nc2c(c1)C)CSc1cc(nc(c1)C)C)CC	23	5.25	4.63827	-0.611728	6.55658	26	0.218553
CHEMBL498591	FC(F)(F)c1ccc(cc1)\C=C\C(=O)\C=C\c1ccc(cc1)C(F)(F)F	4	6.04	5.39794	-0.64206	7.63043	37	0.293478
CHEMBL147806	Clc1cc2nccc(Nc3cc(O)c(cc3)CNC(C)(C)C)c2cc1	29	5.18	4.5376	-0.642398	6.41427	28	0.256571
CHEMBL1630	Cl.Clc1cc2nccc(Nc3cc(CN(CC)CC)c(O)cc3)c2cc1	15	5.47	4.82391	-0.646091	6.81899	52	0.262269
CHEMBL496605	O=C1N(C=CC=C1)C=1C=C(NCc2c(cccc2C)C)c2n(C=1)c(C)c(n2)C	100	4.67	4	-0.67	5.65433	38	0.20194
CHEMBL2071345	S(C)c1ccc(cc1)\C=C\c1ccc(OC)cc1	23	5.31	4.63827	-0.671728	6.55658	27	0.364254
CHEMBL14276	Fc1cc(cc(NC(=O)N2CCc3cc(OC)c(cc23)C(F)(F)F)c1)-c1cccnc1	28	5.24	4.55284	-0.687158	6.43581	31	0.207607
CHEMBL2204363	Cl.Clc1cc(ccc1Sc1ccccc1N1CCNCC1)C	34	5.19	4.46852	-0.721479	6.31662	35	0.287119
CHEMBL2413881	Clc1cc2nccc(Nc3cc(ccc3)C(N(CC)CC)c3nnnn3C(C)(C)C)c2cc1	4.33	6.12	5.36351	-0.756488	7.58176	33	0.22975
CHEMBL377414	Fc1cc(F)ccc1[C@@H](N1[C@@H](CC(C)C)C(=O)N[C@H](C2Cc3c(C2)cccc3)C1=O)C(=O)N(C)C	64	4.98	4.19382	-0.78618	5.92831	35	0.16938
CHEMBL1080472	O=C1N(C=CC=C1)c1nc(NCc2c(cccc2C)C)c2[nH]c(C)c(c2c1)C	29	5.33	4.5376	-0.792398	6.41427	31	0.229081
CHEMBL14362	Clc1ccc(NC(=O)N2CCc3cc(OC)c(cc23)C(F)(F)F)cc1-c1cnccc1C	11	5.76	4.95861	-0.801393	7.0094	35	0.219044
CHEMBL14368	Brc1cc(cc(NC(=O)N2CCc3cc(OC)c(cc23)C(F)(F)F)c1)-c1cccnc1	7	5.96	5.1549	-0.805098	7.28687	38	0.23506
CHEMBL2204356	Cl.Clc1c(Sc2ccccc2N2CCNCC2)cccc1Cl	32	5.3	4.49485	-0.80515	6.35384	28	0.288811
CHEMBL3094310	O(Cc1nc2c(cc1)cccc2)c1cc2n(c(nc2cc1)C1CC1)-c1ccccc1	3.3	6.29	5.48149	-0.808514	7.74853	30	0.258284
CHEMBL147587	Clc1cc2nccc(Nc3cc(O)c(cc3)CN(CC)CC)c2cc1	23	5.47	4.63827	-0.831728	6.55658	30	0.262263
CHEMBL3114738	s1cncc1COC(=O)N[C@H]([C@@H](NC(=O)[C@@H](NC(=O)N(Cc1nc(sc1)C(C)C)C)C(C)C)Cc1ccccc1)Cc1ccccc1	22.9	5.49	4.64016	-0.849835	6.55925	47	0.139559
CHEMBL2204359	Cl.Clc1cc(Cl)ccc1Sc1ccccc1N1CCNCC1	27	5.42	4.56864	-0.851364	6.45814	22	0.293552
CHEMBL416896	FC(F)(F)c1cc2N(CCc2cc1OC)C(=O)Nc1cc(cc(c1)CC)-c1cccnc1	6	6.08	5.22185	-0.858151	7.38151	37	0.230672
CHEMBL248231	O1CC(=O)N(c2cc(ccc12)CN1CCN(CC1)CCOc1c2c(nc(cc2)C)ccc1)Cc1ccccc1	11	5.83	4.95861	-0.871393	7.0094	39	0.179728
CHEMBL466191	Clc1cc(Cl)ccc1Nc1ncc(C(=O)NCC2CCOCC2)c(c1)C(C)C	60	5.13	4.22185	-0.908151	5.96793	28	0.21314
CHEMBL1171008	Clc1cc(S(=O)(=O)Nc2cc(Cl)cnc2Oc2ccccc2C(O)=O)ccc1Cl	39.8107	5.32	4.4	-0.92	6.21976	29	0.214474
CHEMBL231430	Clc1ccc(cc1)-c1ccc(S(=O)(=O)Nc2cc3CCN(CCc3cc2)C)cc1	25	5.55	4.60206	-0.94794	6.50539	32	0.224324
CHEMBL479	S1c2c(N(c3c1cccc3)CCC1N(CCCC1)C)cc(SC)cc2	9.3323	6	5.03001	-0.969989	7.11033	25	0.284413
CHEMBL348475	O(C)c1cc(C(=O)Nc2ccc(cc2)CCN2CCc3cc(OC)c(OC)cc3C2)c(NC(=O)c2cc3c(nc2)cccc3)cc1OC	27.2	5.55	4.56543	-0.984569	6.45361	48	0.13445
CHEMBL2071348	S(C)c1ccc(cc1)\C=C\c1cc(OC)ccc1OC	39.5	5.4	4.4034	-0.996597	6.22457	20	0.311228
CHEMBL1223751	Clc1ccccc1Cn1nc(C)c(CN(CC(O)COc2ccc(OCC)cc2)C)c1C	100	5.03	4	-1.03	5.65433	38	0.176698
CHEMBL453384	Clc1cc2nccc(Nc3cc(CNC(C)(C)C)c(F)cc3)c2cc1	8.8	6.09	5.05552	-1.03448	7.14639	25	0.285855
CHEMBL2152522	N1(CCCCC1)[C@H]([C@@H](N1CCCCC1)c1ccccc1)c1ccccc1	19.9526	5.8	4.7	-1.1	6.64383	26	0.255532
CHEMBL2152523	N1(CCCCC1)[C@@H]([C@H](N1CCCCC1)c1ccccc1)c1ccccc1	19.9526	5.8	4.7	-1.1	6.64383	26	0.255532
CHEMBL376487	s1cc(nc1)[C@@H](NC(=O)c1cc2nc(n(c2cc1)C1CCCCC1)-c1ccoc1)Cc1c2cc(O)ccc2[nH]c1	30	5.63	4.52288	-1.10712	6.39346	40	0.159836
CHEMBL496321	Clc1ccc(cc1)\C=C\C(=O)\C=C\c1ccc(Cl)cc1	26.6	5.7	4.57512	-1.12488	6.4673	20	0.323365
CHEMBL496	Clc1c(Cc2c(O)c(Cl)cc(Cl)c2Cl)c(O)c(Cl)cc1Cl	1.3133	7.03	5.88164	-1.14836	8.31417	21	0.395913
CHEMBL465470	Clc1cc(Cl)ccc1Nc1ncc(C(=O)NCC2CCOCC2)c(c1)C(C)(C)C	22	5.82	4.65758	-1.16242	6.58386	29	0.22703
CHEMBL3094307	O(Cc1nc2c(cc1)cccc2)c1cc2n(-c3ccccc3)c(nc2cc1)N(C)C	7.3	6.31	5.13668	-1.17332	7.26111	30	0.242037
CHEMBL2347328	FC(F)(F)c1ccc(cc1)-c1ccc(cc1)-c1[nH]c(nc1)[C@H]1N(CCC1)C(=O)[C@@H](NC(OC)=O)C(C)C	82.9	5.26	4.08145	-1.17855	5.76946	37	0.155931
CHEMBL240436	Clc1ccc(cc1)CNC(=O)CN(S(=O)(=O)c1ccc(cc1)C)c1ccccc1CC	31.6228	5.68	4.5	-1.18	6.36112	31	0.205197
CHEMBL192820	C1CCCCC1CCCC	55	5.46	4.25964	-1.20036	6.02134	10	0.602134
CHEMBL3091492	O(Cc1nc2c(cc1)cccc2)c1cc2n(c(nc2cc1)C(C)C)-c1ccccc1	2.8	6.77	5.55284	-1.21716	7.84939	30	0.261646
CHEMBL267210	Clc1ccc(cc1)-c1nc2c(ccc(C)c2C)c(C(O)=O)c1O	4	6.62	5.39794	-1.22206	7.63043	37	0.331758
CHEMBL2071353	Clc1ccccc1\C=C\c1ccc(SC)cc1	14.5	6.11	4.83863	-1.27137	6.8398	17	0.402341
CHEMBL1651219	Clc1ccc(cc1C(O)=O)-c1cc(ccc1)COc1cc2SN(C3CCCC3)C(=O)c2cc1	6.2	6.49	5.20761	-1.28239	7.36138	33	0.223072
CHEMBL3094199	O(Cc1nc2c(cc1)cccc2)c1cc2n(c(nc2cc1)CCC)-c1ccccc1	3.3	6.9	5.48149	-1.41851	7.74853	30	0.258284
CHEMBL14469	Clc1ccc(NC(=O)N2CCc3cc(OC)c(cc23)C(F)(F)F)cc1-c1cccnc1	73	5.56	4.13668	-1.42332	5.84753	31	0.18863
CHEMBL231350	Clc1ccc(cc1)-c1ccc(S(=O)(=O)Nc2cc3CCN(CCc3cc2NC(C)C)C)cc1	51	5.72	4.29243	-1.42757	6.0677	33	0.18387
CHEMBL248407	O1CC(=O)N(c2cc(ccc12)CN1CCN(CC1)CCOc1c2c(nc(cc2)C)ccc1)CCc1ccccc1	17	6.22	4.76955	-1.45045	6.74215	40	0.168554
CHEMBL208787	o1c2c(cc(cc2)[C@@H](N2[C@@H](CC(C)C)C(=O)N[C@H](C3Cc4c(C3)cccc4)C2=O)C(=O)NC(C)C)cc1	73	5.66	4.13668	-1.52332	5.84753	37	0.158041
CHEMBL1080473	[nH]1c2c(cc(nc2NCc2c(cccc2C)C)-c2ccccc2)c(C)c1C	3.7	7.04	5.4318	-1.6082	7.67829	31	0.284381
CHEMBL498193	FC(F)(F)c1ccc(cc1)\C=C\1/CCC\C(=C\c2ccc(cc2)C(F)(F)F)\C/1=O	10.4	6.62	4.98297	-1.63703	7.04383	29	0.242891
CHEMBL1077335	OC(=O)\C=C\c1ccc(NC(=O)C2(NC(=O)c3cc4nc(n(c4cc3)C3CCCCC3)-c3ncccc3)CCCC2)cc1	30	6.19	4.52288	-1.66712	6.39346	42	0.148685
CHEMBL1079958	O=C1N(C=CC=C1)c1nc(NCc2c(cccc2C)C)c2n(CC)c(C)c(c2c1)C	65	5.94	4.18709	-1.75291	5.91879	30	0.197293
CHEMBL3215850	Cl.Cl.Cl.Clc1cccc(N2CCN(CC2)CCCNC(=O)c2nc(n(c2Cn2ncnc2)-c2ccccc2)-c2ccccc2)c1C	15.3	6.6	4.81531	-1.78469	6.80683	46	0.147975
CHEMBL1928095	s1c(-c2cc(OC)c(OC)cc2)c(C)c(C#N)c1\N=C\c1ccc(cc1)-c1ccccc1	26	6.39	4.58503	-1.80497	6.48131	32	0.202541
CHEMBL3094296	O(Cc1nc2c(cc1)cccc2)c1cc2n(c(nc2cc1OC)C(C)C)-c1ccccc1	18	6.68	4.74473	-1.93527	6.70706	34	0.209596
CHEMBL1080088	O=C1N(C=CC=C1)c1nc(NCc2c(cccc2C)C)c2n(CC=C)c(C)c(c2c1)C	62	6.18	4.20761	-1.97239	5.9478	31	0.191864
CHEMBL1171786	Clc1cc(S(=O)(=O)Nc2cc(Cl)ccc2Oc2ccccc2C(O)=O)ccc1Cl	39.8107	6.44	4.4	-2.04	6.21976	29	0.214474
CHEMBL1077334	o1cc(cc1)-c1nc2cc(ccc2n1C1CCCCC1)C(=O)NC1(CCCC1)C(=O)Nc1ccc(cc1)\C=C\C(O)=O	30	6.58	4.52288	-2.05712	6.39346	43	0.152225
CHEMBL10188	Oc1c(nc2c(cccc2)c1C(=O)N[C@@H](CC)c1ccccc1)-c1ccccc1	5	7.38	5.30103	-2.07897	7.49344	32	0.258394
CHEMBL2018918	S(Cc1ccc(cc1)C(C)(C)C)c1[nH]c2c(n1)cc(OC)cc2	50	6.4	4.30103	-2.09897	6.07986	35	0.264342
CHEMBL497137	Oc1c(cc(cc1CC)\C=C/1\CC\C(=C/c2cc(CC)c(O)c(c2)CC)\C\1=O)CC	36.7	6.75	4.43533	-2.31467	6.26971	30	0.20899
CHEMBL2152165	Clc1ccc(nc1)[C@](NC(=O)NC1CCCC1)(Cc1ccccc1)c1cc(OC(F)(F)C(F)F)cc(F)c1	40	7.37	4.39794	-2.97206	6.21685	38	0.163601
CHEMBL1672448	Clc1cccc(Cl)c1-c1noc(C(C)C)c1COc1ccc(cc1)-c1cc2c(nc(cc2)C(O)=O)cc1	21	7.84	4.67778	-3.16222	6.61242	37	0.178714
CHEMBL197140	Fc1cc(ccc1-c1ccc(OC2CC(CC(C2)(C)C)(C)C)cc1)C1(CC1)C(O)=O	26	7.84	4.58503	-3.25497	6.48131	36	0.216044
CHEMBL3265238	Brc1cc2c3cc(Br)ccc3n(c2cc1)C[C@@H](F)CNc1nc(OC)ccc1	20	8.06	4.69897	-3.36103	6.64238	34	0.237228
CHEMBL552240	Clc1ccc(cc1)C(=O)c1c2c(n(Cc3cc(O[C@@H](CC)C(O)=O)ccc3)c1C)cc(OC(F)(F)F)cc2	40	7.76	4.39794	-3.36206	6.21685	38	0.163601
CHEMBL498590	O=C(\C=C\c1ccc(cc1)C(C)(C)C)\C=C\c1ccc(cc1)C(C)(C)C	28	7.93	4.55284	-3.37716	6.43581	35	0.247531
CHEMBL10921	S(Cc1ccc(F)cc1)C1=NC(=O)C(=CN1CC(=O)N(Cc1ccc(cc1)-c1ccc(cc1)C(F)(F)F)CCN(CC)CC)Cc1cn(nc1)C	100	7.5	4	-3.5	5.65433	51	0.110869
CHEMBL498371	Oc1c(cc(cc1C(C)C)\C=C/1\CC\C(=C/c2cc(C(C)C)c(O)c(c2)C(C)C)\C\1=O)C(C)C	28.4	8.05	4.54668	-3.50332	6.4271	34	0.189032
CHEMBL3116156	Clc1ccc(nc1)[C@@](Nc1[nH]c2c(n1)cccc2)(Cc1ccccc1)c1cc(OC(F)(F)C(F)F)cc(F)c1	40	8.16	4.39794	-3.76206	6.21685	39	0.159406
CHEMBL3116158	Clc1ccc(nc1)[C@@](Nc1scc(n1)C(F)(F)F)(Cc1ccccc1)c1cc(OC(F)(F)C(F)F)cc(F)c1	40	8.19	4.39794	-3.79206	6.21685	39	0.159406
CHEMBL1933349	Clc1cc(cc(Cl)c1)-c1nn([C@@H](C)c2ccc(cc2)C(=O)NCCC(O)=O)c(c1)-c1cc2c(cc(OC)cc2)cc1	92	7.84	4.03621	-3.80379	5.70551	41	0.139159
CHEMBL476302	Clc1cccc(Cl)c1-c1noc(C(C)C)c1COc1ccc(cc1)-c1cc2c(cc1)c(ccc2)C(O)=O	23	8.52	4.63827	-3.88173	6.55658	37	0.177205
CHEMBL3116155	Clc1ccc(nc1)[C@@](Nc1[nH]c2c(n1)cc(F)cc2)(Cc1ccccc1)c1cc(OC(F)(F)C(F)F)cc(F)c1	40	8.41	4.39794	-4.01206	6.21685	40	0.155421
CHEMBL3116154	Clc1ccc(nc1)[C@@](Nc1[nH]c2c(n1)cc(F)cc2F)(Cc1ccccc1)c1cc(OC(F)(F)C(F)F)cc(F)c1	40	8.59	4.39794	-4.19206	6.21685	41	0.15163
CHEMBL498372	Oc1c(cc(cc1C(C)(C)C)\C=C/1\CC\C(=C/c2cc(C(C)(C)C)c(O)c(c2)C(C)(C)C)\C\1=O)C(C)(C)C	42.8	9.84	4.36856	-5.47144	6.17531	38	0.162508
	CYP1A2 inhibitors with negative clogP and LipE>=5
	CYP1A2 inhibitors with positive clogP and LipE>=5

## Sheet: Table S2
Exploring the Chemical Space of Cytochrome P450 Inhibitors using Integrated Physicochemical Parameters, Drug Efficiency Metrics and Decision Tree Models Yusra Sajid Kiani and Ishrat Jabeen* Research Center for Modeling and Simulation (RCMS), National University of Science and Technology (NUST), Sector H-12, 44000, Islamabad, Pakistan * Correspondence: Corresponding Author: Ishrat.jabeen@rcms.nust…
	TABLE S2: LipE and LE profiling results of CYP2C9 inhibitors dataset
CMPD_CHEMBLID CYP2C9	CANONICAL_SMILES	IC50(µM)	clogP	pIC50	LipE	ΔG	a_heavy	Ligand efficiency
CHEMBL179399	[n+]1(c[nH]cc1-c1cccnc1)C	79.5	-3.77	4.09963	7.86963	5.79516	12	0.48293
CHEMBL2419525	S(=O)(=O)(C1CCN(CC1)C1CCOCC1)c1ccc(cc1)CNC(=O)N1Cc2c(C1)cncc2	0.27	-0.97	6.56864	7.53864	9.2853	34	0.273097
CHEMBL2419524	S(=O)(=O)(C1CCN(CC1)C1COC1)c1ccc(cc1)CNC(=O)N1Cc2c(C1)cncc2	0.3	-0.85	6.52288	7.37288	9.22062	32	0.288144
CHEMBL2069802	S(=O)(=O)(Cc1oc(nn1)C(=O)NCc1ccncc1)c1ccccc1	1.7	-1.15	5.76955	6.91955	8.15573	25	0.326229
CHEMBL2419516	S(=O)(=O)(c1ccc(cc1)CNC(=O)N1Cc2c(C1)cncc2)c1ccc(nc1)N	0.065	0.42	7.18709	6.76709	10.1595	29	0.350329
CHEMBL484345	S(=O)(=O)(n1ncc2c1cccc2NC(=O)CCN)c1c2c(ccc1)cccc2	0.007	1.52	8.1549	6.6349	11.5276	28	0.411701
CHEMBL2419518	S(=O)(=O)(c1ccc(cc1)CNC(=O)N1Cc2c(C1)cncc2)c1cn(nc1)C(C)C	0.073	0.91	7.13668	6.22668	10.0883	30	0.336276
CHEMBL2419515	S(=O)(=O)(c1ccc(cc1)CNC(=O)N1Cc2c(C1)cncc2)c1ccc(nc1)C	0.077	1.14	7.11351	5.97351	10.0555	29	0.346742
CHEMBL2069801	S(=O)(=O)(Cc1nc(on1)C(=O)NCc1ccncc1)c1ccccc1	2.2	-0.15	5.65758	5.80758	7.99745	25	0.319898
CHEMBL2419505	S(=O)(=O)(c1ccc(cc1)CNC(=O)N1Cc2c(C1)cncc2)c1ccccc1	0.054	1.53	7.26761	5.73761	10.2734	28	0.366905
CHEMBL2425654	OC1CCC(Nc2nc(-n3nnc4c3cccc4)ccn2)CC1	0.0078	2.4	8.10791	5.70791	11.4612	23	0.498312
CHEMBL2391567	S(=O)(=O)(N1CCOCC1)c1ccc(NC(=O)NCc2cccnc2)cc1	0.2	1.05	6.69897	5.64897	9.46954	26	0.364213
CHEMBL511410	Oc1cc(ccc1)C(NC=1C(=O)C(=O)C=1Nc1ccncc1)C(=O)N	6.5	-0.31	5.18709	5.49709	7.33237	25	0.293295
CHEMBL2393188	S(=O)(=O)(c1ccc(NC(=O)NCc2cncnc2)cc1)c1ccccc1	0.149	1.46	6.82681	5.36681	9.65026	26	0.371164
CHEMBL2425651	O=C(NC1CCC(Nc2nc(-n3nnc4c3cccc4)ccn2)CC1)C	0.039	2.09	7.40894	5.31894	10.4731	26	0.402813
CHEMBL3127494	S(=O)(=O)(c1ccc(NC(=O)[C@@H]2C[C@H]2c2cccnc2)cc1)c1cn(nc1)C1CCOCC1	0.91	0.75	6.04096	5.29096	8.53939	32	0.266856
CHEMBL2393168	S(=O)(=O)(N1CCC(NCC1)C(F)(F)F)c1ccc(NC(=O)NCc2cccnc2)cc1	0.11	1.71	6.95861	5.24861	9.83656	31	0.317308
CHEMBL2030436	S(=O)(=O)(Cc1nc(nc(N2CCOCC2)c1)-c1cc2c([nH]cc2)cc1)C	5	0.1	5.30103	5.20103	7.49344	26	0.288209
CHEMBL2393160	S(=O)(=O)(N1CCC12COC2)c1ccc(NC(=O)NCc2cccnc2)cc1	1.14	0.81	5.9431	5.1331	8.40105	27	0.31115
CHEMBL2393186	S(=O)(=O)(c1ccc(NC(=O)NCc2nnccc2)cc1)c1ccccc1	0.515	1.19	6.28819	5.09819	8.88887	26	0.34188
CHEMBL2393159	S(=O)(=O)(N1[C@H]2C[C@H](OC2)C1)c1ccc(NC(=O)NCc2cccnc2)cc1	0.554	1.32	6.25649	4.93649	8.84406	27	0.327558
CHEMBL467079	O=C1C(=O)C(NC(C(=O)N)c2ccccc2)=C1Nc1ccncc1	5.1	0.36	5.29243	4.93243	7.48128	24	0.31172
CHEMBL638	Fc1cc(F)ccc1[C@](O)([C@@H](C)c1ncncc1F)Cn1ncnc1	3.62	0.52	5.44129	4.92129	7.69171	25	0.307668
CHEMBL2146710	Clc1cc(Cl)ccc1C(=O)NCC1(CCC(S(=O)(=O)c2nn[nH]c2)CC1)CC1CC1	0.01	3.1	8	4.9	11.3087	30	0.376955
CHEMBL2393187	S(=O)(=O)(c1ccc(NC(=O)NCc2nccnc2)cc1)c1ccccc1	0.46	1.46	6.33724	4.87724	8.95821	26	0.344546
CHEMBL2170635	FC(F)(F)c1cc(ccc1C1CCN(CC1)C(=O)c1ccncc1)C(=O)NC(N)=N	0.4	1.56	6.39794	4.83794	9.04401	30	0.301467
CHEMBL270903	S(=O)(=O)(C)c1ccc(cc1)Cn1ncc(c1)-c1ccncc1	1.3	1.06	5.88606	4.82606	8.32042	22	0.378201
CHEMBL1200604	OCC(C(=O)N(Cc1ccncc1)CC)c1ccccc1	1	1.18	6	4.82	8.48149	21	0.40388
CHEMBL1215621	Clc1cc(F)ccc1C1C(C#N)=C(NC(Cn2ncnc2)=C1C(OC)=O)C	0.1	2.19	7	4.81	9.89507	27	0.366484
CHEMBL2001019	OCCn1ncc(c1)-c1nc2n(nnc2nc1)Cc1cc2c(nccc2)cc1	5	0.53	5.30103	4.77103	7.49344	28	0.267623
CHEMBL2391572	S(=O)(=O)(c1ccc(NC(=O)NCc2cccnc2)cc1)c1ccccc1	0.068	2.42	7.16749	4.74749	10.1318	26	0.389686
CHEMBL482562	S(=O)(=O)(n1ncc2c1cc(NC(=O)C1CCNCC1)cc2)c1c2c(ccc1)cccc2	0.37	1.69	6.4318	4.7418	9.09187	31	0.293286
CHEMBL2392697	FC(F)(F)c1ccccc1CNC(=O)C1CCN(CC1)c1nc(nc(n1)N1CCOCC1)C	0.4	1.66	6.39794	4.73794	9.04401	33	0.274061
CHEMBL3127500	S(=O)(=O)(c1cc(S(=O)(=O)C)ccc1)c1ccc(NC(=O)[C@@H]2C[C@H]2c2cccnc2)cc1	0.57	1.51	6.24413	4.73413	8.82658	31	0.284728
CHEMBL1109	S(=O)(=O)(Nc1n(ncc1)-c1ccccc1)c1ccc(N)cc1	0.18	2.07	6.74473	4.67473	9.53422	22	0.433374
CHEMBL1825089	S(=O)(=O)(N(CCN1CCOCC1)c1ccc(Nc2nc3n(ncc3cn2)C2CCCCCC2)cc1)C	0.001	4.33	9	4.67	12.7222	36	0.353395
CHEMBL485620	O=C1c2cccnc2N(C=C1C(=O)NC1CC1)c1cc(ccc1)-c1ccc([n+]([O-])c1)C(O)(C)C	59	-0.44	4.22915	4.66915	5.97824	34	0.175831
CHEMBL3110021	o1cncc1-c1ccc(cc1)[C@@H]1[C@H]([C@H]1C(=O)NO)c1ccccc1	0.4	1.73	6.39794	4.66794	9.04401	24	0.376834
CHEMBL2393177	S(=O)(=O)(N1CCOCC1)c1ccc(NC(=O)NCc2cc(cnc2)C)cc1	0.644	1.55	6.19111	4.64111	8.75164	27	0.324135
CHEMBL231924	Clc1ccccc1NC=1Nc2c(S(=O)(=O)N=1)cc([N+](=O)[O-])cc2O	0.6	1.61	6.22185	4.61185	8.79509	24	0.366462
CHEMBL1822792	S(=O)(=O)(Nc1cc2c(C=Cc3ncc(cc3C2=O)-c2cn(nc2)C)cc1)N(C[C@H]1OCCOC1)C	1.2	1.31	5.92082	4.61082	8.36956	35	0.23913
CHEMBL2393158	S(=O)(=O)(N1C2CCC1COC2)c1ccc(NC(=O)NCc2cccnc2)cc1	1.05	1.37	5.97881	4.60881	8.45154	28	0.301841
CHEMBL2393180	S(=O)(=O)(N1CCOCC1)c1ccc(NC(=O)NC(C)c2cccnc2)cc1	1.3	1.36	5.88606	4.52606	8.32042	27	0.308164
CHEMBL112592	O(Cc1ncccc1)c1ccc(-n2ccnc2)cc1	0.13	2.39	6.88606	4.49606	9.734	19	0.512316
CHEMBL2393167	S(=O)(=O)(N1CCC(NCC1)C)c1ccc(NC(=O)NCc2cccnc2)cc1	0.93	1.54	6.03152	4.49152	8.52604	28	0.304501
CHEMBL2393185	S(=O)(=O)(c1ccc(NC(=O)NCc2cc(F)cnc2)cc1)c1ccccc1	0.074	2.64	7.13077	4.49077	10.0799	27	0.37333
CHEMBL598194	Clc1ccc(cc1)CNC(=O)C1(N)CCN(CC1)c1ncnc2[nH]ccc12	1	1.55	6	4.45	8.48149	27	0.314129
CHEMBL2047879	Clc1ccc(NS(=O)(=O)CCCF)c(F)c1NC(=O)c1c2ncnc(N)c2sc1	9	0.64	5.04576	4.40576	7.13259	29	0.245951
CHEMBL1172346	O=C(Nc1ccc(cc1C=1CCCCC=1)-c1ccncc1)c1[nH]cc(n1)C#N	0.003	4.12	8.52288	4.40288	12.0478	28	0.430278
CHEMBL1089	N(N)CCc1ccccc1	4	1.03	5.39794	4.36794	7.63043	10	0.763043
CHEMBL230964	Fc1cc(N2C[C@@H](OC2=O)Cn2nncc2)ccc1-c1ccc(nc1)C(=O)Cn1ccnc1	8	0.74	5.09691	4.35691	7.2049	33	0.21833
CHEMBL1078595	S(=O)(=O)(Nc1cc2CCN(CCc2cc1)Cc1n[nH]cc1)c1ccc(nc1)N1CCOCC1	0.2	2.36	6.69897	4.33897	9.46954	33	0.286956
CHEMBL372575	S(=O)(=O)(C)c1ccc(cc1)\C(=C\c1cc(ccc1)-c1cc(cc2c1nccc2)C(S(=O)(=O)C)(C)C)\c1onc(n1)C	0.2	2.46	6.69897	4.23897	9.46954	41	0.230964
CHEMBL252490	S(=O)(=O)(C(C)(C)c1cc(c2ncccc2c1)-c1cc(ccc1)-c1ccc([n+]([O-])c1)NC(=O)NC(C)C)C	1.5	1.6	5.82391	4.22391	8.23257	37	0.222502
CHEMBL3127510	S(=O)(=O)(c1ccc(NC(=O)[C@H]2C[C@@H]2c2cccnc2)cc1)c1cn(nc1)C(C)C	0.78	1.96	6.10791	4.14791	8.63402	29	0.297725
CHEMBL2391551	S(=O)(=O)(c1ccc(NC(=O)NC(C)c2cccnc2)cc1)c1ccccc1	0.139	2.72	6.85699	4.13699	9.69291	27	0.358997
CHEMBL2393191	S(=O)(=O)(N1[C@@H](COC[C@H]1C)C)c1ccc(NC(=O)NCc2cccnc2)cc1	0.601	2.09	6.22113	4.13113	8.79407	28	0.314074
CHEMBL2393166	S(=O)(=O)(N1CC(CNCC1)C)c1ccc(NC(=O)NCc2cccnc2)cc1	2.18	1.54	5.66154	4.12154	8.00305	28	0.285823
CHEMBL2070948	s1c(cnc1N1CCN(CC1)C(=O)[C@@H]1CCCC[C@H]1C(=O)NC1(CC1)C#N)C(C#N)(C)C	3.16228	1.43	5.5	4.07	7.7747	32	0.242959
CHEMBL178090	o1c(ccc1CN)-c1cccnc1	11.7	0.87	4.93181	4.06181	6.97152	13	0.536271
CHEMBL578359	S(=O)(=O)(C)c1ccc(cc1)C(S(=O)(=O)C)Cc1cc(ccc1)-c1cc(cc2c1nccc2)C(S(=O)(=O)C)(C)C	6.9	1.12	5.16115	4.04115	7.29571	39	0.187069
CHEMBL3127509	S(=O)(=O)(c1ccc(NC(=O)[C@@H]2C[C@H]2c2cccnc2)cc1)c1cn(nc1)C(C)C	1	1.96	6	4.04	8.48149	29	0.292465
CHEMBL2393190	S(=O)(=O)(N1C[C@H](O[C@H](C1)C)C)c1ccc(NC(=O)NCc2cccnc2)cc1	0.75	2.09	6.12494	4.03494	8.6581	28	0.309218
CHEMBL466496	O=C1C(=O)C(N[C@@H](C)c2ccccc2)=C1Nc1ccncc1	0.6	2.22	6.22185	4.00185	8.79509	22	0.399777
CHEMBL2393176	S(=O)(=O)(c1ccc(NC(=O)NCc2cc(cnc2)C)cc1)c1ccccc1	0.125	2.91	6.90309	3.99309	9.75808	27	0.36141
CHEMBL403065	S(=O)(=O)(C(C)(C)c1cc(c2ncccc2c1)-c1cc(ccc1)-c1ccc([n+]([O-])c1)C(=O)NC1CC1)C	4	1.43	5.39794	3.96794	7.63043	36	0.211956
CHEMBL2170637	FC(F)(F)c1cc(ccc1C1CCN(CC1)C(=O)c1ncccc1)C(=O)NC(N)=N	3	1.56	5.52288	3.96288	7.80704	30	0.260235
CHEMBL456807	N(N)c1ccccc1	6	1.26	5.22185	3.96185	7.38151	8	0.922689
CHEMBL61	O1C[C@H]2[C@@H]([C@@H](c3c(cc4OCOc4c3)[C@@H]2O)c2cc(OC)c(OC)c(OC)c2)C1=O	4	1.44	5.39794	3.95794	7.63043	30	0.254348
CHEMBL565558	S(=O)(=O)(C)c1ccc(cc1)C(Cc1cc(ccc1)-c1cc(cc2c1nccc2)C(S(=O)(=O)C)(C)C)C(=O)C	0.6	2.28	6.22185	3.94185	8.79509	38	0.23145
CHEMBL2165189	O1CCN(C[C@@H]1C)C1=NC(=O)NC(N(Cc2c3c(ccc2)cccc3)CCO)=C1	4	1.46	5.39794	3.93794	7.63043	29	0.263118
CHEMBL270272	O(C(=O)[C@@H](NCc1ccccc1)Cc1nc[nH]c1)C	20	0.8	4.69897	3.89897	6.64238	19	0.349599
CHEMBL113227	O(CCCc1ccncc1)c1ccc(-n2ccnc2)cc1	0.101	3.1	6.99568	3.89568	9.88896	21	0.470903
CHEMBL436847	S(=O)(=O)(C(C)(C)c1cc(c2ncccc2c1)-c1cc(ccc1)-c1ccc([n+]([O-])c1)C(O)(C)C)C	15	0.93	4.82391	3.89391	6.81899	34	0.200558
CHEMBL270996	Fc1c2cc([nH]c2ccc1OC1=NC=Nn2c1c(C)c(OC[C@H](OC(=O)CN)C)c2)C	0.063	3.31	7.20066	3.89066	10.1787	31	0.328346
CHEMBL2170617	FC(F)(F)c1cc(ccc1C1CCN(CC1)C(=O)c1nccn1C)C(=O)NC(N)=N	18	0.86	4.74473	3.88473	6.70706	30	0.223569
CHEMBL3127506	S(=O)(=O)(c1ccc(NC(=O)[C@@H]2C[C@H]2c2cccnc2)cc1)c1cn(nc1)CCC	0.9	2.18	6.04576	3.86576	8.54617	29	0.294696
CHEMBL2316378	O1CCC(CC1)CNC(=O)c1nc(OC)ccc1NC(=O)c1c2c(cccc2)c(cc1)Cn1nncc1	0.11	3.1	6.95861	3.85861	9.83656	37	0.265853
CHEMBL585566	S(=O)(=O)(C)c1ccc(cc1)C(S(=O)(=O)C)(F)Cc1cc(ccc1)-c1cc(cc2c1nccc2)C(S(=O)(=O)C)(C)C	4.5	1.49	5.34679	3.85679	7.55812	40	0.188953
CHEMBL1908355	Clc1cc\2c(N(C(=O)N)C(=O)/C/2=C(/O)\c2sccc2)cc1	0.7	2.3	6.1549	3.8549	8.70045	21	0.414307
CHEMBL2170638	FC(F)(F)c1cc(ccc1C1CCN(CC1)C(=O)c1ccc(cc1)C(=O)N)C(=O)NC(N)=N	4	1.56	5.39794	3.83794	7.63043	33	0.231225
CHEMBL2316379	O1CCC(CC1)CNC(=O)c1ncccc1NC(=O)c1c2c(cccc2)c(cc1)Cn1nncc1	0.66	2.35	6.18046	3.83046	8.73658	35	0.249616
CHEMBL403977	S(=O)(=O)(C(C)(C)c1cc(c2ncccc2c1)-c1cc(ccc1)-c1ccncc1)C	0.11	3.14	6.95861	3.81861	9.83656	29	0.339192
CHEMBL2407749	O=C/1Nc2c(cccc2)\C\1=C/c1cc2[nH]nc(c2cc1)\C=C\c1ccncc1	0.02	3.89	7.69897	3.80897	10.8831	28	0.388683
CHEMBL1672633	Fc1cnccc1-c1ncc(nc1-c1ocnc1)NC(=O)C1CC1	25	0.8	4.60206	3.80206	6.50539	24	0.271058
CHEMBL2170607	FC(F)(F)c1cc(ccc1C1CCN(CC1)C(=O)C1CC1)C(=O)NC(N)=N	6	1.42	5.22185	3.80185	7.38151	27	0.273389
CHEMBL115876	O(CCCc1ncccc1)c1ccc(-n2ccnc2)cc1	0.129	3.1	6.88941	3.78941	9.73874	21	0.46375
CHEMBL485629	O=C1c2cccnc2N(C=C1C(=O)NC1CC1)c1cc(ccc1)C#Cc1ccc[n+]([O-])c1	40	0.61	4.39794	3.78794	6.21685	32	0.194276
CHEMBL2170618	FC(F)(F)c1cc(ccc1C1CCN(CC1)C(=O)c1n(cnc1)C)C(=O)NC(N)=N	25	0.86	4.60206	3.74206	6.50539	30	0.216846
CHEMBL2011126	O=C1N(Cc2c1nc(nc2NCc1ncc2c(c1)cccc2)N1CCN(CC1)C(=O)C)C(C)C	7	1.43	5.1549	3.7249	7.28687	34	0.21432
CHEMBL482409	Oc1ccc(cc1)\C=C\1/CCC\C(=C\c2ccc(O)cc2)\C/1=O	1	2.28	6	3.72	8.48149	23	0.36876
CHEMBL1738840	O(C)c1cc(ncc1)CCc1[nH]c2ncccc2n1	3.16228	1.8	5.5	3.7	7.7747	19	0.409195
CHEMBL485968	s1c(ccc1C(=O)NC(C)c1ccncc1)C(=O)C(F)(F)F	3	1.84	5.52288	3.68288	7.80704	22	0.354865
CHEMBL2323775	S(=O)(=O)(NCc1ncccc1)Cc1cc2c(C=Cc3ncc(cc3C2=O)-c2cn(nc2)C)cc1	14.73	1.15	4.8318	3.6818	6.83014	34	0.200886
CHEMBL359657	s1c(ccc1CN)-c1cccnc1	8.9	1.38	5.05061	3.67061	7.13945	13	0.549188
CHEMBL2419490	S(=O)(=O)(NC(=O)C1CCN(CC1)c1nc(C)c(cc1C#N)C(OCC)=O)Cc1ccccc1	3.3	1.82	5.48149	3.66149	7.74853	33	0.234804
CHEMBL178516	[nH]1cc(nc1)-c1cccnc1	41.8	0.73	4.37882	3.64882	6.18982	11	0.562711
CHEMBL2036225	S(=O)(=O)(C)c1ccc(cc1)CN(C(=O)Cc1ccccc1)c1cc(cc(F)c1)-c1[nH]nnn1	0.29	2.89	6.5376	3.6476	9.24143	33	0.280043
CHEMBL3127507	S(=O)(=O)(c1ccc(NC(=O)[C@H]2C[C@@H]2c2cccnc2)cc1)c1cn(nc1)CCC	1.5	2.18	5.82391	3.64391	8.23257	29	0.283882
CHEMBL270361	O(C)c1cc(ccc1O)\C=C\1/CC\C(=C\c2cc(OC)c(O)cc2)\C/1=O	2.8	1.92	5.55284	3.63284	7.84939	26	0.3019
CHEMBL262968	O(CCCc1cccnc1)c1ccc(-n2ccnc2)cc1	0.185	3.1	6.73283	3.63283	9.5174	21	0.45321
CHEMBL2011119	O(C)c1ccc(cc1)[C@@H](Nc1nc(nc2c1CN(C(C)C)C2=O)N1CCN(CC1)C(=O)C)C	2.4	1.99	5.61979	3.62979	7.94403	33	0.240728
CHEMBL571022	S(=O)(=O)(C)c1ccc(cc1)C(C(=O)c1cccnc1)Cc1cc(ccc1)-c1cc(cc2c1nccc2)C(S(=O)(=O)C)(C)C	0.2	3.09	6.69897	3.60897	9.46954	43	0.220222
CHEMBL2332065	O(C)c1cc(ccc1)CN(CCO)C(=O)Nc1ccc(cc1)-c1cn[nH]c1	2	2.11	5.69897	3.58897	8.05596	27	0.298369
CHEMBL113018	O1CCN(CC1)CCOc1ccc(-n2ccnc2)cc1	1.81	2.16	5.74232	3.58232	8.11724	20	0.405862
CHEMBL3127520	S(=O)(=O)(c1ccc(NC(=O)[C@@H]2C[C@H]2c2cccnc2)cc1)c1ccccc1	0.49	2.74	6.3098	3.5698	8.91942	27	0.330349
CHEMBL3114896	S(=O)(=O)(C)c1cc(F)c(Nc2ncnc3n(ncc23)C2CCN(CC2)C(OC(C)(C)C)=O)cc1	0.9	2.48	6.04576	3.56576	8.54617	34	0.251358
CHEMBL568446	S(=O)(=O)(C)c1ccc(cc1)C(P(OC)(OC)=O)Cc1cc(ccc1)-c1cc(cc2c1nccc2)C(S(=O)(=O)C)(C)C	11.4	1.38	4.9431	3.5631	6.98747	41	0.170426
CHEMBL485771	s1c(ccc1C(=O)N1CCC(CC1)c1oc(nn1)-c1ccccc1)C(=O)C(F)(F)F	5	1.75	5.30103	3.55103	7.49344	30	0.249781
CHEMBL2316382	S(=O)(Cc1c2c(cccc2)c(cc1)C(=O)Nc1ccc(OC)nc1C(=O)NCC1CCOCC1)C	1.6	2.25	5.79588	3.54588	8.19295	35	0.234084
CHEMBL1085745	FC(F)(F)Oc1ccccc1CNC(=O)N1CC(CC1)c1ccncc1	0.3	3	6.52288	3.52288	9.22062	26	0.354639
CHEMBL355905	S(=O)(=O)(C=1C(N2C(=NC=1SC)C=CC=C2)=N)c1ccccc1	24.2	1.11	4.61618	3.50618	6.52535	22	0.296607
CHEMBL1276654	Fc1c2CCC3(Oc2ccc1)CCN(CC3)c1nnc(cc1)-c1oc(nn1)Cc1cccnc1	3	2.02	5.52288	3.50288	7.80704	34	0.229619
CHEMBL2170606	FC(F)(F)c1cc(ccc1C1CCN(CC1)C(=O)C(C)C)C(=O)NC(N)=N	7	1.68	5.1549	3.4749	7.28687	27	0.269884
CHEMBL2332097	O(C)c1cc(ccc1)CN(C(=O)Nc1ccc(cc1)-c1cn[nH]c1)C	0.6	2.75	6.22185	3.47185	8.79509	25	0.351804
CHEMBL179529	s1c(ccc1NC)-c1cccnc1	2.1	2.21	5.67778	3.46778	8.026	13	0.617385
CHEMBL2036222	S(=O)(=O)(C)c1ccc(cc1)CN(C(=O)CC(C)C)c1cc(cc(F)c1)-c1[nH]nnn1	1.7	2.33	5.76955	3.43955	8.15573	30	0.271858
CHEMBL2170615	S(=O)(=O)(N)c1ccc(cc1)C(=O)N1CCC(CC1)c1ccc(cc1C(F)(F)F)C(=O)NC(N)=N	16	1.36	4.79588	3.43588	6.77937	34	0.199393
CHEMBL2158293	O=C(Nc1ccc(cc1C=1CCCCC=1)C1CCN(CC1)C(=O)Cc1nc[nH]c1)c1[nH]cc(n1)C#N	0.33	3.05	6.48149	3.43149	9.16211	36	0.254503
CHEMBL3264002	S(=O)(=O)(Nc1nccc(CC=2C(Oc3c(ccc(Oc4ncccn4)c3)C=2C)=O)c1F)NC	12	1.49	4.92082	3.43082	6.95598	33	0.210787
CHEMBL2070947	s1c2cc(S(=O)(=O)C)ccc2nc1N1CCN(CC1)C(=O)[C@@H]1CCCC[C@H]1C(=O)NC1(CC1)C#N	7.94328	1.67	5.1	3.43	7.20927	35	0.205979
CHEMBL360999	n1cn(cc1-c1cccnc1)C	79.5	0.68	4.09963	3.41963	5.79516	12	0.48293
CHEMBL2392698	FC(F)(F)c1ccccc1CNC(=O)C1CCN(CC1)c1nc(nc(n1)NCCOC)C	1.8	2.33	5.74473	3.41473	8.12064	32	0.25377
CHEMBL498251	O[C@H]1Cc2c(cccc2)[C@@H]1NC1=CC(n2ncnc2)=Cn2c1nc(C)c2C	5.3	1.87	5.27572	3.40572	7.45767	27	0.27621
CHEMBL3127521	S(=O)(=O)(c1ccc(NC(=O)[C@H]2C[C@@H]2c2cccnc2)cc1)c1ccccc1	0.72	2.74	6.14267	3.40267	8.68316	27	0.321599
CHEMBL2332055	s1c2c(ncnc2N2CCC(CC2)CCNC(=O)C(C)(C)C)cc1C(=O)N	7.2	1.75	5.14267	3.39267	7.26958	27	0.269244
CHEMBL442078	O=C(C(=O)N1CCN(C[C@H]1C)C(=O)c1ccccc1)c1c2cccnc2[nH]c1	7.9	1.72	5.10237	3.38237	7.21262	28	0.257594
CHEMBL1672621	O=C(Nc1nc(c(nc1)-c1ccncc1)-c1cccnc1)C1CC1	25	1.24	4.60206	3.36206	6.50539	24	0.271058
CHEMBL1204130	Cl.S(=O)(=O)(C(F)(Cc1cc(ccc1)-c1cc(cc2c1nccc2)C(S(=O)(=O)C)(C)C)c1ccc(S(=O)(=O)C)cc1)C1CC1	3.7	2.07	5.4318	3.3618	7.67829	43	0.178565
CHEMBL1085746	Clc1cc(Cl)ccc1CNC(=O)N1CCC(Oc2ccncc2)CC1	0.1	3.64	7	3.36	9.89507	25	0.395803
CHEMBL220862	Fc1ccc(cc1)-c1c(-c2ccncc2)c(n(C)c1C#N)N1CCN(CC1)C(=O)C	4	2.04	5.39794	3.35794	7.63043	30	0.254348
CHEMBL1204131	ClC.S(=O)(=O)(C(F)(Cc1cc(ccc1)-c1cc(cc2c1nccc2)C(S(=O)(=O)C)(C)C)c1ccc(S(=O)(=O)C)cc1)C1CC1	3.8	2.07	5.42022	3.35022	7.66192	44	0.174134
CHEMBL372357	S1(=O)(=O)NC(=Nc2c1cccc2)C=1C(=O)N(c2c(cc(F)cc2)C=1O)CCC1CC1	0.84	2.73	6.07572	3.34572	8.58853	30	0.286284
CHEMBL570939	S(=O)(=O)(C(F)(Cc1cc(ccc1)-c1cc(cc2c1nccc2)C(S(=O)(=O)C)(C)C)c1ccc(S(=O)(=O)C)cc1)C1CC1	3.9	2.07	5.40894	3.33894	7.64597	42	0.182047
CHEMBL2011127	O=C1N(Cc2c1nc(nc2N(Cc1ncc2c(c1)cccc2)C)N1CCN(CC1)C(=O)C)C(C)C	7	1.82	5.1549	3.3349	7.28687	35	0.208196
CHEMBL231509	Clc1cc(ccc1)C(O)CNC=1C=CNC(=O)C=1c1[nH]c2c(n1)c(cc(c2)C(=O)N(C)C)C	2.8	2.22	5.55284	3.33284	7.84939	33	0.23786
CHEMBL2036217	Fc1cc(cc(N(Cc2cc(O)ccc2)C(=O)CC)c1)-c1[nH]nnn1	2	2.37	5.69897	3.32897	8.05596	25	0.322238
CHEMBL2170636	FC(F)(F)c1cc(ccc1C1CCN(CC1)C(=O)c1cccnc1)C(=O)NC(N)=N	13	1.56	4.88606	3.32606	6.90684	30	0.230228
CHEMBL567585	S(=O)(=O)(C)c1ccc(cc1)C(Cc1cc(ccc1)-c1cc(cc2c1nccc2)C(S(=O)(=O)C)(C)C)CO	3.6	2.12	5.4437	3.3237	7.69511	37	0.207976
CHEMBL2170609	FC(F)(F)c1cc(ccc1C1CCN(CC1)C(=O)CC)C(=O)NC(N)=N	21	1.37	4.67778	3.30778	6.61242	26	0.254324
CHEMBL112532	O(CCCC)c1ccc(-n2ccnc2)cc1	0.096	3.71	7.01773	3.30773	9.92013	16	0.620008
CHEMBL408962	Fc1ccc(cc1)CNC(=O)C=1N=C2N(CCCC[C@@H]2N(C(=O)C(=O)N(C)C)C)C(=O)C=1O	75	0.82	4.12494	3.30494	5.83094	33	0.176695
CHEMBL2170608	FC(F)(F)c1cc(ccc1C1CCN(CC1)C(=O)COC)C(=O)NC(N)=N	25	1.3	4.60206	3.30206	6.50539	27	0.24094
CHEMBL1672611	o1cccc1-c1nc(NC(=O)C2CC2)cnc1-c1ccncc1	5	2.02	5.30103	3.28103	7.49344	23	0.325802
CHEMBL2419495	S(=O)(=O)(NC(=O)C1CCN(CC1)c1nc(C)c(cc1C#N)C(OCC)=O)Cc1ccc(F)cc1F	4.1	2.11	5.38722	3.27722	7.61527	35	0.217579
CHEMBL2380735	S(=O)(=O)([C@@H]1C[C@H](N(C1)C(=O)C)C(=O)N[C@H](C(=O)c1oc2c(n1)cccc2)CC)c1ccccc1	5	2.03	5.30103	3.27103	7.49344	34	0.220395
CHEMBL2419491	S(=O)(=O)(NC(=O)C1CCN(CC1)c1nc(C)c(cc1C#N)C(OCC)=O)Cc1ccc(F)cc1	5.9	1.96	5.22915	3.26915	7.39183	34	0.217407
CHEMBL2207099	Clc1cc(S(=O)(=O)Nc2cc(Cl)cnc2Cc2nnnn2C)ccc1Cl	1.58489	2.54	5.8	3.26	8.19877	26	0.315337
CHEMBL3127525	S(=O)(=O)(N1CC2OC(CC2)C1)c1ccc(NC(=O)[C@@H]2C[C@H]2c2cccnc2)cc1	7.8	1.85	5.10791	3.25791	7.22044	29	0.248981
CHEMBL1738841	S(=O)(=O)(C(F)(F)F)c1ccc(N2C(=O)[C@@H](N(Cc3c4c(ncc3)cccc4)C2=O)C)cc1	0.7	2.9	6.1549	3.2549	8.70045	32	0.271889
CHEMBL467114	Clc1cc(Cc2nc(ccc2)C(=O)[O-])c(OCc2ccc(Cl)cc2F)cc1.[Na+]	8	1.85	5.09691	3.24691	7.2049	28	0.257318
CHEMBL2048028	Clc1c2CCN(Cc2cc(Cl)c1C(=O)N[C@@H](Cc1cc(S(=O)(=O)C)ccc1)C(O)=O)C(=O)c1cc2occc2cc1	3	2.28	5.52288	3.24288	7.80704	41	0.190416
CHEMBL252469	S(=O)(=O)(C)c1cc(ccc1)-c1cc(ccc1)-c1cc(cc2c1nccc2)C(S(=O)(=O)C)(C)C	0.58	3	6.23657	3.23657	8.8159	33	0.267149
CHEMBL103651	ON\C=N\c1ccccc1C	77	0.88	4.11351	3.23351	5.81478	11	0.528616
CHEMBL2392696	FC(F)(F)c1ccccc1CNC(=O)C1CCN(CC1)c1nc(nc(n1)NC(C)C)C	0.4	3.17	6.39794	3.22794	9.04401	31	0.291742
CHEMBL2316383	S(=O)(Cc1c2c(cccc2)c(cc1)C(=O)Nc1cccnc1C(=O)NCC1CCOCC1)C	19	1.5	4.72125	3.22125	6.67387	33	0.202238
CHEMBL2425958	O=C1N(CCc2ccccc2)C(=Nc2c1ccc(c2)\C=C\C(=O)NO)C	9.1	1.84	5.04096	3.20096	7.12581	26	0.274069
CHEMBL3287739	Fc1cc(C(=O)NC2CCC(NC(=O)c3nn(C)c(c3)C)CC2)c(Oc2cc(ccc2)-c2ccc(O)cc2CN2CCOCC2)nc1	0.25119	3.4	6.6	3.2	9.32963	47	0.198503
CHEMBL1270110	O(C(=O)N1C[C@@H](Nc2ncc(cc2)C#N)CC1)C1C2CC3(CC1CC(C3)C2)C(=O)N	20	1.51	4.69897	3.18897	6.64238	30	0.221413
CHEMBL251883	S(=O)(=O)(C(C)(C)c1cc(c2ncccc2c1)-c1cc(ccc1)-c1ccc[n+]([O-])c1)C	36	1.26	4.4437	3.1837	6.28153	30	0.209384
CHEMBL2019022	S(Cc1ncccc1)c1[nH]c2c(n1)cc(OC)cc2	0.55	3.08	6.25964	3.17964	8.84851	19	0.465711
CHEMBL1088051	S1(=O)(=O)N=C(Nc2c1cc(O[C@@H](C(=O)N)C)cc2)C=1C(=O)N(c2c(cc(F)cc2)C=1O)CCC1CC1	1.7	2.59	5.76955	3.17955	8.15573	36	0.226548
CHEMBL2152252	Clc1ccc(cc1S(=O)(=O)Nc1cccc(F)c1F)-c1nc(C(=O)NC)c(nc1)N	0.591	3.05	6.22841	3.17841	8.80437	30	0.293479
CHEMBL204772	s1c2N(CC(C)C)C(=O)N(C)C(=O)c2c(C(=O)N2C[C@@H](O)CC2)c1Cn1c2c(nc1C)cccc2	2.5	2.43	5.60206	3.17206	7.91897	35	0.226256
CHEMBL524472	O=C1C(=O)C(N[C@@H](C)c2ccccc2)=C1Nc1[nH]ncc1	12	1.76	4.92082	3.16082	6.95598	21	0.331237
CHEMBL2165175	O=C1NC(=NC(=C1)c1cc(ncc1)C)NCc1c2c(ccc1)cccc2	0.4	3.24	6.39794	3.15794	9.04401	26	0.347847
CHEMBL2011125	O=C1N(Cc2c1nc(nc2NCc1cc2c(nc1)cccc2)N1CCN(CC1)C(=O)C)C(C)C	16	1.64	4.79588	3.15588	6.77937	34	0.199393
CHEMBL2011113	Clc1ccc(cc1)CNc1nc(nc2c1CN(C(C)C)C2=O)N1CCN(CC1)C(=O)C	2.4	2.47	5.61979	3.14979	7.94403	31	0.256259
CHEMBL203567	Fc1ccc(-n2ncc(C(=O)c3cc(OC[C@@H](O)CO)ccc3)c2N)cc1	11	1.81	4.95861	3.14861	7.0094	27	0.259607
CHEMBL101168	n1nn(N)c2c1cccc2	42.9	1.23	4.36754	3.13754	6.17388	10	0.617388
CHEMBL402953	S(=O)(=O)(C)c1ccc(cc1)-c1cc(ccc1)-c1cc(cc2c1nccc2)C(S(=O)(=O)C)(C)C	0.73	3	6.13668	3.13668	8.67469	33	0.262869
CHEMBL592675	O1c2c(C(=O)[C@H](O)[C@H]1c1cc3O[C@H]([C@@H](Oc3cc1)CO)c1cc(OC)c(O)cc1)c(O)cc(O)c2	8.2	1.95	5.08619	3.13619	7.18974	35	0.205421
CHEMBL1923983	O(CC(=O)NCc1nc(ccc1)-c1[nH]c2nc(NC)c3ncn(c3c2c1)C)C	25	1.47	4.60206	3.13206	6.50539	28	0.232335
CHEMBL2170631	FC(F)(F)c1cc(ccc1C1CCN(CC1)C(=O)c1ccccc1C#N)C(=O)NC(N)=N	4	2.27	5.39794	3.12794	7.63043	32	0.238451
CHEMBL1270001	O(C(=O)N1C[C@H](Nc2ncc(cc2)C#N)CC1)C1C2CC3(CC1CC(C3)C2)C(=O)N	23.1	1.51	4.63639	3.12639	6.55391	30	0.218464
CHEMBL3235164	S(=O)(=O)(C)c1ccc(Oc2cc(cc(c2)C(=O)Nc2nn(cc2)COCCOC)-c2ncccc2C)cc1	5.2	2.18	5.284	3.104	7.46936	38	0.196562
CHEMBL579266	S(=O)(=O)(C)c1ccc(cc1)C(Cc1cc(ccc1)-c1cc(cc2c1nccc2)C(S(=O)(=O)C)(C)C)C(=O)C(O)(C)C	3.6	2.34	5.4437	3.1037	7.69511	41	0.187686
CHEMBL2419492	S(=O)(=O)(NC(=O)C1CCN(CC1)c1nc(C)c(cc1C#N)C(OCC)=O)Cc1ccc(OC)cc1	15	1.74	4.82391	3.08391	6.81899	35	0.194828
CHEMBL1215552	Clc1cc(F)ccc1C1C(C#N)=C(NC(Cn2ccnc2)=C1C(OC)=O)C	1	2.92	6	3.08	8.48149	27	0.314129
CHEMBL358880	O(CCCC)c1ccc(-n2cncc2C)cc1	0.088	3.98	7.05552	3.07552	9.97355	17	0.586679
CHEMBL254518	S(=O)(=O)(C(C)(C)c1cc(c2ncccc2c1)-c1cc(ccc1)-c1cccnc1)C	0.63	3.14	6.20066	3.06066	8.76514	29	0.302246
CHEMBL583867	O=C(C(=O)N1CCN(C[C@H]1C)C(=O)c1ccccc1)c1c2c([nH]c1)cncc2	17	1.72	4.76955	3.04955	6.74215	28	0.240791
CHEMBL1215620	Clc1cc(F)ccc1C1C(C#N)=C(NC(Cn2nccc2)=C1C(OC)=O)C	0.6	3.19	6.22185	3.03185	8.79509	27	0.325744
CHEMBL251882	S(=O)(=O)(C(C)(C)c1cc(c2ncccc2c1)-c1cc(ccc1)-c1ccc(cc1)CS(=O)(=O)C)C	1.6	2.77	5.79588	3.02588	8.19295	34	0.240969
CHEMBL10	S(=O)(C)c1ccc(cc1)-c1[nH]c(c(n1)-c1ccc(F)cc1)-c1ccncc1	1	2.99	6	3.01	8.48149	27	0.314129
CHEMBL375955	Clc1cc(Nc2nc(C(F)(F)F)c(cn2)C(=O)NCc2ccncc2)ccc1	0.9	3.04	6.04576	3.00576	8.54617	28	0.30522
CHEMBL1215622	Clc1cc(F)ccc1C1C(C#N)=C(NC(Cn2nnnc2)=C1C(OC)=O)C	1.9	2.72	5.72125	3.00125	8.08745	27	0.299535
CHEMBL2017286	o1nc(C)c(-c2cc3ncc4NC(=O)N(c4c3cc2OC)Cc2ncccc2)c1C	9.8	2.01	5.00877	2.99877	7.08031	30	0.23601
CHEMBL477611	S(=O)(=O)(N)c1cc(Nc2nc(N(C)c3cc4[nH]nc(c4cc3)C)ccn2)ccc1	0.7	3.16	6.1549	2.9949	8.70045	29	0.300016
CHEMBL556849	S(=O)(=O)(N(C)[C@@H]1CCc2n(c3nccnc3c2C1)CC(O)=O)c1ccc(F)cc1	15	1.83	4.82391	2.99391	6.81899	29	0.235138
CHEMBL1085893	S1(=O)(=O)N=C(Nc2c1cc(OCC(=O)N)cc2)C=1C(=O)N(c2c(cc(F)cc2)C=1O)CCC1CC1	5.4	2.28	5.26761	2.98761	7.44619	35	0.212748
CHEMBL513491	Clc1cc(F)ccc1COc1ccc(Cl)cc1Cc1nc(ccc1)C(=O)[O-].[Na+]	15	1.85	4.82391	2.97391	6.81899	28	0.243535
CHEMBL222460	Clc1cc(C=2c3cc(ccc3NC(=O)C=2CCO)C(F)(F)F)c(O)cc1	1.7	2.82	5.76955	2.94955	8.15573	26	0.313682
CHEMBL326849	S1C2SC=CC2C=C1CN1C[C@H](N(CC1)C[C@@H](O)C[C@@H](Cc1ccncc1)C(=O)N[C@H]1c2c(OC[C@H]1O)cccc2)C(=O)NCC(F)(F)F	8.59	2.12	5.06601	2.94601	7.16121	49	0.146147
CHEMBL2019026	S(Cc1ncccc1)c1[nH]c2c(n1)cc(N)cc2	6.97	2.22	5.15677	2.93677	7.28951	18	0.404973
CHEMBL361364	n1cn(cc1-c1cccnc1)CC	75.2	1.2	4.12378	2.92378	5.8293	13	0.448408
CHEMBL2392701	FC(F)(F)c1ccccc1CNC(=O)C1CCN(CC1)c1nc(nc(NC)c1)C	1	3.09	6	2.91	8.48149	29	0.292465
CHEMBL178711	s1c(ccc1CNCc1sc(cc1)-c1cccnc1)-c1cccnc1	0.71	3.24	6.14874	2.90874	8.69175	25	0.34767
CHEMBL115769	Fc1ccc(cc1)-c1nc-2[nH]c(N)cc(OC)c-2c1-c1ccncc1	1	3.1	6	2.9	8.48149	25	0.33926
CHEMBL467720	Clc1cc(Cl)ccc1COc1ccc(Cl)cc1Cc1nc(ccc1)C(=O)[O-].[Na+]	4.8	2.42	5.31876	2.89876	7.5185	28	0.268518
CHEMBL258502	O(C)c1ccc(cc1)C(OCCCc1ccc(OC)cc1)Cn1ccnc1	0.22	3.76	6.65758	2.89758	9.41103	27	0.348557
CHEMBL1935601	S(=O)(=O)(c1cc(F)ccc1)c1cc2oc3c(CCNC34CCCOC4)c2cc1	1.9	2.83	5.72125	2.89125	8.08745	28	0.288837
CHEMBL205245	Clc1n(Cc2sc3N(CC(C)C)C(=O)N(C)C(=O)c3c2C(=O)N2C[C@@H](O)CC2)c(nc1Cl)C	8.7	2.19	5.06048	2.87048	7.1534	33	0.21677
CHEMBL1466	O1c2c(cccc2)C(O)=C(CC=2C(Oc3c(cccc3)C=2O)=O)C1=O	0.3	3.66	6.52288	2.86288	9.22062	25	0.368825
CHEMBL3086078	S(=O)(=O)(Nc1cccc(CC=2C(Oc3c(cc(F)c(OC(=O)N(C)C)c3)C=2C)=O)c1F)N	12	2.06	4.92082	2.86082	6.95598	32	0.217374
CHEMBL331431	S(=O)(=O)(N(CCCO)c1n(ncc1)-c1ccccc1)c1ccc(cc1)CCN	10	2.14	5	2.86	7.06791	28	0.252425
CHEMBL1085744	FC(F)(F)Oc1ccccc1CNC(=O)N1CCC(Oc2ccncc2)CC1	0.8	3.24	6.09691	2.85691	8.61848	28	0.307803
CHEMBL163	s1cncc1COC(=O)N[C@H]([C@@H](O)C[C@@H](NC(=O)[C@@H](NC(=O)N(Cc1nc(sc1)C(C)C)C)C(C)C)Cc1ccccc1)Cc1ccccc1	0.016	4.94	7.79588	2.85588	11.0201	50	0.220402
CHEMBL220360	Clc1ccc(cc1)C[C@@H]([C@@H](NC(=O)C(Oc1ncc(cc1)C(F)(F)F)(C)C)C)c1cc(ccc1)C#N	0.00093	6.19	9.03152	2.84152	12.7668	36	0.354633
CHEMBL1794073	Cl.S(=O)(=O)(N)c1cc(Nc2nc(N(C)c3cc4n(nc(c4cc3)C)C)ccn2)ccc1	1	3.16	6	2.84	8.48149	31	0.273596
CHEMBL2393178	S(=O)(=O)(c1ccc(NC(=O)NCc2cnccc2C)cc1)c1ccccc1	1.96	2.87	5.70774	2.83774	8.06836	27	0.298828
CHEMBL2011115	FC(F)(F)Oc1ccc(cc1)CNc1nc(nc2c1CN(C(C)C)C2=O)N1CCN(CC1)C(=O)C	2.4	2.79	5.61979	2.82979	7.94403	35	0.226972
CHEMBL252090	S(=O)(=O)(C(C)(C)c1cc(c2ncccc2c1)-c1cc(ccc1)-c1ccc([n+]([O-])c1)C)C	26	1.76	4.58503	2.82503	6.48131	31	0.209074
CHEMBL205807	s1c2N(CC(C)C)C(=O)N(C)C(=O)c2c(C(=O)N2C[C@@H](O)CC2)c1Cc1c2c([nH]c1)cccc2	1.4	3.03	5.85387	2.82387	8.27492	34	0.24338
CHEMBL231409	Clc1cc(ccc1)C(O)CNC=1C=CNC(=O)C=1c1[nH]c2c(n1)c(cc(c2)C(=O)NC)C	2.9	2.72	5.5376	2.8176	7.82785	32	0.24462
CHEMBL364713	O1[C@@H](c2c(c(OC)c(OC)cc2)C1=O)[C@@H]1N(CCc2c1c(OC)c1OCOc1c2)C	8.1773	2.27	5.08739	2.81739	7.19144	30	0.239715
CHEMBL1078492	s1c(ccc1S(=O)(=O)Nc1cc2CCN(CCc2cc1)Cc1n[nH]cc1)-c1ncccc1	0.4	3.59	6.39794	2.80794	9.04401	32	0.282625
CHEMBL129134	Oc1ccc(cc1)\C=C\C(=O)\C=C\c1ccc(O)cc1	1.8	2.94	5.74473	2.80473	8.12064	20	0.406032
CHEMBL104	Clc1ccccc1C(n1ccnc1)(c1ccccc1)c1ccccc1	0.016	5	7.79588	2.79588	11.0201	25	0.440804
CHEMBL475534	O(C(=O)C=1C(C(C(OC)=O)=C(NC=1C)C)c1cc([N+](=O)[O-])ccc1)CC	0.3	3.73	6.52288	2.79288	9.22062	26	0.354639
CHEMBL2036223	S(=O)(=O)(C)c1ccc(cc1)CN(C(=O)C1CCCC1)c1cc(cc(F)c1)-c1[nH]nnn1	7.4	2.34	5.13077	2.79077	7.25276	31	0.23396
CHEMBL512127	S(=O)(=O)(C)c1ccccc1C(=O)N(CC(O)(CNC(=O)c1cnn(c1N)-c1ccc(F)cc1)C(F)(F)F)CC	23	1.85	4.63827	2.78827	6.55658	39	0.168117
CHEMBL432386	S(=O)(=O)(Nc1n(ncc1)-c1ccccc1)c1ccc(cc1)C	0.6	3.44	6.22185	2.78185	8.79509	22	0.399777
CHEMBL598336	O(C)c1cc(ccc1OC)C(=O)NCc1cc(ccc1)C(=O)NCCc1ccncc1	16	2.03	4.79588	2.76588	6.77937	31	0.218689
CHEMBL381679	Clc1cc(C=2c3cc(ccc3N(C)C(=O)C=2CCO)C(F)(F)F)c(O)cc1	1.1	3.2	5.95861	2.75861	8.42298	27	0.311962
CHEMBL2392693	FC(F)(F)c1ccccc1CNC(=O)C1CCN(CC1)c1nc(nc(n1)NC)C1CCCCC1	0.063	4.45	7.20066	2.75066	10.1787	34	0.299374
CHEMBL485549	o1c(ccc1[N+](=O)[O-])\C=N\NC(=O)c1cc([N+](=O)[O-])cc([N+](=O)[O-])c1O	7	2.41	5.1549	2.7449	7.28687	26	0.280264
CHEMBL577965	o1c2c(cc1C)cc(N\C(=N\C(=O)c1cc(cnc1)C(=O)N)\N[C@H]1CCCCN(CC(=O)N3CCCC3)C1=O)cc2	10	2.26	5	2.74	7.06791	41	0.172388
CHEMBL1269894	FC(F)(F)c1ccc(nc1)N[C@H]1CCN(C1)C(OC1C2CC3(CC1CC(C3)C2)C(=O)N)=O	2.4	2.88	5.61979	2.73979	7.94403	32	0.248251
CHEMBL1271427	FC(F)(F)c1nc(N[C@@H]2CCN(C2)C(OC2C3CC4(CC2CC(C4)C3)C(=O)N)=O)ccc1	2.4	2.88	5.61979	2.73979	7.94403	32	0.248251
CHEMBL2164422	S(=O)(=O)(NCCO)c1ccc(cc1)-c1c2cc([nH]c2ncc1)C1CC1	7	2.42	5.1549	2.7349	7.28687	25	0.291475
CHEMBL483140	Fc1c2c(c3onc(c3cc2)CCC(=O)NC=2CCCCC=2C(O)=O)ccc1O	2	2.97	5.69897	2.72897	8.05596	29	0.277792
CHEMBL452101	Oc1ccc(cc1)\C=C\1/CC\C(=C\c2ccc(O)cc2)\C/1=O	9.9	2.28	5.00436	2.72436	7.07408	22	0.321549
CHEMBL207071	s1c(cc(N)c1C(=O)N)-c1ccc(F)cc1	7	2.45	5.1549	2.7049	7.28687	16	0.45543
CHEMBL345544	O(CCCC)c1ccc(-n2ncnc2)cc1	2.8	2.85	5.55284	2.70284	7.84939	16	0.490587
CHEMBL1794074	Cl.Cl.S(=O)(=O)(N)c1cc(Nc2nc(N(C)c3cc4nn(C)c(c4cc3)C)ccn2)ccc1	1.4	3.16	5.85387	2.69387	8.27492	32	0.258591
CHEMBL1081860	S(=O)(=O)(Nc1cc2CCN(CCc2cc1)Cc1n[nH]cc1)c1ccc(cc1)C#N	2.5	2.91	5.60206	2.69206	7.91897	29	0.273068
CHEMBL2170605	FC(F)(F)c1cc(ccc1C1CCN(CC1)C(=O)C(C)(C)C)C(=O)NC(N)=N	17	2.08	4.76955	2.68955	6.74215	28	0.240791
CHEMBL710	O=C1N[C@@H]2CC[C@H]3[C@@H]4CC[C@H](C(=O)NC(C)(C)C)[C@]4(CC[C@@H]3[C@]2(C=C1)C)C	2	3.01	5.69897	2.68897	8.05596	27	0.298369
CHEMBL2017291	o1nc(C)c(-c2cc3ncc4NC(=O)N(c4c3cc2OC)[C@H](C)c2ncccc2)c1C	9.9	2.32	5.00436	2.68436	7.07408	31	0.228196
CHEMBL1650645	Oc1ccc2c(ccc(c2)-c2cc(O)ccc2)c1-c1cccnc1	0.15	4.15	6.82391	2.67391	9.64615	24	0.401923
CHEMBL2036030	Fc1cc(cc(N(Cc2cc(OC(C)C)ccc2)C(=O)CC)c1)-c1[nH]nnn1	0.34	3.8	6.46852	2.66852	9.14378	28	0.326564
CHEMBL387611	Clc1cc(ccc1)C(O)CNC=1C=CNC(=O)C=1c1[nH]c2c(n1)c(cc(c2)C1=NCCN1C)C	91	1.38	4.04096	2.66096	5.71222	34	0.168007
CHEMBL496035	OCc1ncnn1C=1C=C(NCc2c(cccc2C)C)c2n(C=1)c(C)c(n2)C	6.5	2.53	5.18709	2.65709	7.33237	28	0.26187
CHEMBL2347988	FC(F)Oc1cc2c(n(nc2-c2nc3c([nH]cc3C(=O)NC(C)(C)C)nc2)CCC(O)CO)cc1	8	2.44	5.09691	2.65691	7.2049	35	0.205854
CHEMBL2207100	Clc1cc(Cn2nncc2)c(NS(=O)(=O)c2sc(Cl)cc2)cc1Cl	1.25893	3.25	5.9	2.65	8.34013	24	0.347505
CHEMBL195561	Clc1cc(C=2c3cc(ccc3N(CC#N)C(=O)C=2CCO)C(F)(F)F)c(O)cc1	3.9	2.76	5.40894	2.64894	7.64597	29	0.263654
CHEMBL478402	S(=O)(=O)(N)c1cc(Nc2nc(N(C)c3cc4nn(cc4cc3)C)ccn2)ccc1	2.9	2.89	5.5376	2.6476	7.82785	29	0.269926
CHEMBL586818	S(=O)(=O)(C)c1ccc(cc1)C(Cc1cc(ccc1)-c1cc(cc2c1nccc2)C(S(=O)(=O)C)(C)C)C(=O)C(C)(C)C	0.7	3.51	6.1549	2.6449	8.70045	41	0.212206
CHEMBL2170294	Fc1ccc(cc1)-c1nn2c(NC[C@@H](C2)CO)c1C1=NN(c2ccccc2C)C(=O)C=C1	19	2.08	4.72125	2.64125	6.67387	32	0.208558
CHEMBL1270269	FC(F)(F)c1cc(ccc1)-c1nc(nc(c1)CCCNC(C(=O)N)(C)C)C#N	35	1.82	4.45593	2.63593	6.29882	28	0.224958
CHEMBL1277582	Clc1cc(F)ccc1N1NC=2C(=C(N(CCCOC)C(=O)C=2)CN(Cc2ccccc2)C)C1=O	0.9	3.41	6.04576	2.63576	8.54617	34	0.251358
CHEMBL2036210	Fc1cc(cc(N(Cc2ccc(cc2)C(F)(F)F)C(=O)CC)c1)-c1[nH]nnn1	0.28	3.92	6.55284	2.63284	9.26298	28	0.330821
CHEMBL2392695	FC(F)(F)c1ccccc1CNC(=O)C1CCN(CC1)c1nc(nc(n1)N(C)C)C	10	2.37	5	2.63	7.06791	30	0.235597
CHEMBL2207081	Clc1cc(S(=O)(=O)Nc2cc(Cl)ccc2Cn2nncc2)ccc1Cl	0.63096	3.57	6.2	2.63	8.7642	25	0.350568
CHEMBL2036213	Fc1cc(cc(N(Cc2ccc(OC(F)(F)F)cc2)C(=O)CC)c1)-c1[nH]nnn1	0.2	4.07	6.69897	2.62897	9.46954	29	0.326536
CHEMBL2170629	FC(F)(F)c1cc(ccc1C1CCN(CC1)C(=O)c1ccc(cc1)C#N)C(=O)NC(N)=N	13	2.27	4.88606	2.61606	6.90684	32	0.215839
CHEMBL596133	Clc1cc(S(=O)(=O)N2CCC3(CC3NS(=O)(=O)C)CC2)c(S(=O)(=O)c2ccccc2F)cc1	12	2.31	4.92082	2.61082	6.95598	33	0.210787
CHEMBL1698322	Clc1cc(NC(=O)c2ncccc2)ccc1N1C(=O)C(CC1=O)c1ccccc1	8.7	2.45	5.06048	2.61048	7.1534	29	0.246669
CHEMBL2170639	FC(F)(F)c1cc(ccc1C1CCN(CC1)C(=O)c1ccc(O)nc1)C(=O)NC(N)=N	29	1.93	4.5376	2.6076	6.41427	31	0.206912
CHEMBL2158231	O=C(N1CCC(CC1)c1cc(C=2CCCCC=2)c(NC(=O)c2[nH]cc(n2)C#N)cc1)c1cccnc1	0.54	3.67	6.26761	2.59761	8.85977	36	0.246105
CHEMBL1479	o1ncc2C[C@@]3([C@@H]4[C@H]([C@@H]5CC[C@@](O)(C#C)[C@]5(CC4)C)CCC3=Cc12)C	0.3	3.93	6.52288	2.59288	9.22062	25	0.368825
CHEMBL419396	S1C2SC=CC2C=C1CN1C[C@H](N(CC1)C[C@@H](O)C[C@@H](Cc1cccnc1)C(=O)N[C@H]1c2c(OC[C@H]1O)cccc2)C(=O)NCC(F)(F)F	19.7	2.12	4.70553	2.58553	6.65166	49	0.135748
CHEMBL401930	Clc1cc(ccc1)[C@@H](O)CNC=1C=CNC(=O)C=1c1[nH]c2c(n1)c(cc(N1CCOCC1)c2)C	1.2	3.34	5.92082	2.58082	8.36956	34	0.246164
CHEMBL2178718	s1cc(cc1[C@@]12NC(=N)N(C)C(=O)[C@@H]1CN(C2)c1ncc(F)cn1)-c1cc(ccc1)C#N	22.4	2.07	4.64975	2.57975	6.5728	32	0.2054
CHEMBL403313	S(=O)(=O)(N(C)C)NC(=O)CCCc1c2cc(ccc2[nH]c1-c1ccc(F)cc1)C#N	1.32	3.3	5.87943	2.57943	8.31105	30	0.277035
CHEMBL60889	Clc1cc(C(=O)NCC2OCCN(C2)Cc2ccc(F)cc2)c(OCC)cc1N	1	3.44	6	2.56	8.48149	29	0.292465
CHEMBL462093	O=C1CCc2cc(ccc2C1)-c1cccnc1	28.3	1.99	4.54821	2.55821	6.42927	17	0.378192
CHEMBL567570	O=C(C(=O)N1CCN(C[C@H]1C)C(=O)c1ccccc1)c1c2c([nH]c1)cccc2	5.2	2.73	5.284	2.554	7.46936	28	0.266763
CHEMBL365062	s1cccc1-c1nc(on1)-c1cc(cc(c1)C(=O)N)C(=O)N1CCC(CC1)c1cc(ccc1F)CN	5.38	2.72	5.26922	2.54922	7.44847	36	0.206902
CHEMBL2347413	Fc1cc2n(nc(c2cc1)-c1nc2c([nH]cc2C(=O)NC2(CC(N)C2)C)nc1)C	4	2.85	5.39794	2.54794	7.63043	29	0.263118
CHEMBL2113179	Clc1ccc(N(S(=O)(=O)c2ccc(cc2)CCCO)CC(=O)N\N=C/2\c3c(NC\2=O)cccc3)cc1	0.345	3.92	6.46218	2.54218	9.13482	36	0.253745
CHEMBL2393182	Clc1ncc(cc1)CNC(=O)Nc1ccc(S(=O)(=O)c2ccccc2)cc1	1.77	3.21	5.75203	2.54203	8.13096	27	0.301147
CHEMBL496227	OCc1ncn(n1)C=1C=C(NCc2c(cccc2C)C)c2n(C=1)c(C)c(n2)C	8.6	2.53	5.0655	2.5355	7.1605	28	0.255732
CHEMBL487370	s1c(ccc1C(=O)N1CCN(CC1)c1cc(OC)ccc1)C(=O)C(F)(F)F	5	2.77	5.30103	2.53103	7.49344	27	0.277535
CHEMBL371409	Clc1cc(C=2c3cc(ccc3N(CC(=O)N)C(=O)C=2CCO)C(F)(F)F)c(O)cc1	16	2.27	4.79588	2.52588	6.77937	30	0.225979
CHEMBL568232	S(=O)(=O)(C)c1ccc(cc1)C(Cc1cc(ccc1)-c1cc(cc2c1nccc2)C(S(=O)(=O)C)(C)C)C(CO)(C)C	1.5	3.3	5.82391	2.52391	8.23257	40	0.205814
CHEMBL267865	ON\C=N\c1ccc(cc1C)CCCC	3.3	2.97	5.48149	2.51149	7.74853	15	0.516568
CHEMBL426851	s1c2N(CC(C)C)C(=O)N(C)C(=O)c2c(C(=O)N2C[C@@H](O)CC2)c1Cn1c2c(nc1NC)cccc2	11	2.45	4.95861	2.50861	7.0094	36	0.194705
CHEMBL456390	O=C1Nc2c(cc(cc2)-c2c3c(cccc3)cnc2)CC1	2.9	3.03	5.5376	2.5076	7.82785	21	0.372755
CHEMBL1271320	FC(F)(F)c1ccc(nc1)N[C@@H]1CCN(C1)C(OC1C2CC3(CC1CC(C3)C2)C(=O)N)=O	4.1	2.88	5.38722	2.50722	7.61527	32	0.237977
CHEMBL186730	s1cccc1-c1nc(on1)-c1cc(ccc1)C(=O)N1CCC(CC1)c1cc(ccc1F)CN	0.48	3.82	6.31876	2.49876	8.93208	33	0.270669
CHEMBL475794	Clc1cc(NC(=O)c2cc(NC(=O)c3cc(ccc3)C(C#N)(C)C)ccc2C)cnc1	0.4	3.9	6.39794	2.49794	9.04401	31	0.291742
CHEMBL2170642	FC(F)(F)c1cc(ccc1C1CCN(CC1)C(=O)c1ccccc1)C(=O)NC(N)=N	7	2.66	5.1549	2.4949	7.28687	30	0.242896
CHEMBL3128180	s1c2c(nc1C)[C@@H](CC2)C(=O)Nc1ccc(cc1)C[C@H]1N[C@H](CC1)[C@H](O)c1cccnc1	67.2	1.68	4.17263	2.49263	5.89835	32	0.184324
CHEMBL271121	n1c(cc(nc1-c1ccncc1)NCc1ncc(cn1)C)-c1ccccc1	4.8	2.83	5.31876	2.48876	7.5185	27	0.278463
CHEMBL499007	O(C)c1cc(cnc1)-c1cc2CCC(=O)Cc2cc1	12.9	2.41	4.88941	2.47941	6.91158	19	0.363767
CHEMBL2393192	S(=O)(=O)(c1ccc(NC(=O)NCc2cccnc2C)cc1)c1ccccc1	4.6	2.87	5.33724	2.46724	7.54463	27	0.279431
CHEMBL1951011	S(=O)(=O)(C)c1cc(F)c(Oc2ncnc(OC3CCN(CC3)C(OC(C)C)=O)c2C)cc1	5.3	2.81	5.27572	2.46572	7.45767	32	0.233052
CHEMBL2441208	Clc1ccccc1NC(=O)N1CCN(CC1)c1ncc(NC(=O)c2oc(nc2C(F)(F)F)N2CCCCC2)cc1	6.4	2.73	5.19382	2.46382	7.34189	40	0.183547
CHEMBL218068	O(Cc1ccccc1)C(=O)N1CCC(CC1)CNc1ncncc1	0.5	3.84	6.30103	2.46103	8.90702	24	0.371126
CHEMBL2316386	S(=O)(Cc1c2c(cccc2)c(cc1)C(=O)Nc1ccc(OCCOCCO)nc1C(=O)NCC1CCC1)C	6.7	2.72	5.17393	2.45393	7.31376	38	0.192467
CHEMBL2170630	FC(F)(F)c1cc(ccc1C1CCN(CC1)C(=O)c1cc(ccc1)C#N)C(=O)NC(N)=N	19	2.27	4.72125	2.45125	6.67387	32	0.208558
CHEMBL1290746	Fc1ccccc1-n1ncc(C(=O)Nc2cc(ccc2C)C(=O)Nc2nocc2)c1N	23	2.19	4.63827	2.44827	6.55658	31	0.211502
CHEMBL2017273	Fc1ccccc1Nc1c2cc(OC)c(cc2ncc1C(=O)N)-c1c(noc1C)C	0.6	3.78	6.22185	2.44185	8.79509	30	0.29317
CHEMBL1078336	Clc1ccc(NC(=O)N2CC(CCC2)(CCC(O)=O)c2ccncc2)cc1	10	2.56	5	2.44	7.06791	27	0.261774
CHEMBL584475	S(=O)(=O)(C)c1ccc(cc1)C(F)(Cc1cc(ccc1)-c1cc(cc2c1nccc2)C(S(=O)(=O)C)(C)C)C(O)(C)C	4.6	2.9	5.33724	2.43724	7.54463	40	0.188616
CHEMBL526841	Clc1cc(F)ccc1CNC1=CC(n2ncnc2)=Cn2c1nc(C)c2C	1.1	3.53	5.95861	2.42861	8.42298	26	0.323961
CHEMBL116438	O(C)c1cc(ccc1O)\C=C\C(=O)\C=C(\O)/C=C/c1cc(OC)c(O)cc1	4.3	2.94	5.36653	2.42653	7.58603	27	0.280964
CHEMBL2017285	o1nc(C)c(-c2cc3ncc4NC(=O)N(c4c3cc2OC)Cc2ccccc2)c1C	1.2	3.5	5.92082	2.42082	8.36956	30	0.278985
CHEMBL498026	n12c(nc(C)c1C)C(NCc1ccccc1C)=CC(n1ncnc1)=C2	2.9	3.12	5.5376	2.4176	7.82785	25	0.313114
CHEMBL483336	Clc1c2c(c3onc(c3cc2)CCC(=O)NC=2CCCCC=2C(O)=O)ccc1O	1.5	3.41	5.82391	2.41391	8.23257	29	0.283882
CHEMBL114555	O(CCN1CCN(CC1)C(OCC)=O)c1ccc(-n2ccnc2)cc1	1.44	3.43	5.84164	2.41164	8.25763	25	0.330305
CHEMBL3127501	S(=O)(=O)(c1cc(OC(F)(F)F)ccc1)c1ccc(NC(=O)[C@@H]2C[C@H]2c2cccnc2)cc1	0.45	3.95	6.34679	2.39679	8.9717	32	0.280366
CHEMBL570867	o1c2c(cc1C)cc(N\C(=N/C(=O)c1ccc(nc1)C(=O)N(C)C)\N[C@H]1CCCCN(CC(=O)N3CCCC3)C1=O)cc2	43	1.97	4.36653	2.39653	6.17245	43	0.143545
CHEMBL178547	o1c(ccc1\C=N\O)-c1cccnc1	86.2	1.67	4.06449	2.39449	5.74549	14	0.410392
CHEMBL1080003	FC(F)(F)C=1c2c(OC(=O)C=1CC(O)=O)cc(OC)cc2	50	1.92	4.30103	2.38103	6.07986	21	0.289517
CHEMBL178780	n1cn(cc1-c1cccnc1)Cc1ccccc1	26.9	2.19	4.57025	2.38025	6.46042	18	0.358912
CHEMBL62811	O=C1Nc2c(cc(cc2)-c2cccnc2)CC1	58.9	1.85	4.22988	2.37988	5.97929	17	0.351723
CHEMBL485196	o1nc(c2CCc3cc(O)ccc3-c12)CCC(=O)NC=1CCCCC=1C(O)=O	11	2.58	4.95861	2.37861	7.0094	28	0.250336
CHEMBL252089	S(=O)(=O)(C(C)(C)c1cc(c2ncccc2c1)-c1cc(ccc1)-c1cc2[nH]cnc2nc1)C	2.9	3.16	5.5376	2.3776	7.82785	32	0.24462
CHEMBL205092	s1c2N(CC(C)C)C(=O)N(C)C(=O)c2c(C(=O)N2C[C@@H](O)CC2)c1Cc1c2cccnc2[nH]c1	35	2.08	4.45593	2.37593	6.29882	34	0.185259
CHEMBL2348850	O(C)c1c(OC)cc(cc1OC)-c1nc2c([nH]cc2C(=O)NC(C)C)nc1	16	2.42	4.79588	2.37588	6.77937	27	0.251088
CHEMBL2419494	S(=O)(=O)(NC(=O)C1CCN(CC1)c1nc(C)c(cc1C#N)C(OCC)=O)Cc1ccc(cc1)C(C)C	2.4	3.25	5.61979	2.36979	7.94403	36	0.220667
CHEMBL1210614	S(CCCN1CC2(C(C2)C1)c1cc(S(F)(F)(F)(F)F)ccc1)c1nnc(n1C)-c1ocnc1C	2	3.33	5.69897	2.36897	8.05596	34	0.23694
CHEMBL475684	Clc1cc(-n2nc(cc2)C)ccc1C(=O)N1CCC(F)(F)/C(/c2c1cccc2)=C/C(=O)NCc1nnccc1	13	2.52	4.88606	2.36606	6.90684	39	0.177098
CHEMBL2029729	O1CCC(CC1)[C@@H]1CCc2n(c3c(cc(cc3)C(=O)N(CCCC(=O)NC)C)c2C1)C	7	2.79	5.1549	2.3649	7.28687	31	0.23506
CHEMBL591662	S(=O)(=O)(C)c1ccc(cc1)C(Cc1cc(ccc1)-c1cc(cc2c1nccc2)C(S(=O)(=O)C)(C)C)C(O)(C)C	6.4	2.83	5.19382	2.36382	7.34189	39	0.188254
CHEMBL378405	s1c2N(CC(C)C)C(=O)N(C)C(=O)c2c(S(=O)(=O)N2C[C@@H](O)CC2)c1Cc1ccccc1C(F)(F)F	0.2	4.34	6.69897	2.35897	9.46954	36	0.263043
CHEMBL2011123	Fc1cc(ccc1OCC)[C@@H](Nc1nc(nc2c1CN(C(C)C)C2=O)N1CCN(CC1)C(=O)C)C	11	2.6	4.95861	2.35861	7.0094	35	0.200268
CHEMBL230309	Clc1cc(ccc1)C(O)CNC=1C=CNC(=O)C=1c1[nH]c2c(n1)c(ccc2)C	1.5	3.47	5.82391	2.35391	8.23257	28	0.29402
CHEMBL1078	Fc1ccc(cc1)-c1c2c(n(C(C)C)c1\C=C\[C@@H](O)C[C@@H](O)CC(O)=O)cccc2	0.4	4.05	6.39794	2.34794	9.04401	30	0.301467
CHEMBL193647	Clc1cc(C=2c3cc(ccc3N(Cc3nn[nH]n3)C(=O)C=2CCO)C(F)(F)F)c(O)cc1	19	2.38	4.72125	2.34125	6.67387	32	0.208558
CHEMBL1083769	Clc1cc2c(NC(=O)[C@@]23N[C@H](Cc2c3[nH]c3c2cccc3)C)cc1	1.51	3.48	5.82102	2.34102	8.22849	24	0.342854
CHEMBL1649665	FC(F)(F)c1nn(c2c1CCCC2)-c1ccc(cc1)CC(=O)NC1CCCC1	0.2	4.37	6.69897	2.32897	9.46954	28	0.338198
CHEMBL2041178	O(C)c1ncnc(N2C3(CCN(CC3)Cc3ncccc3C)C(=O)N(c3ccc(cc3)-c3ccc(cc3)C(=O)NC)C2=O)c1	44	2.03	4.35655	2.32655	6.15833	44	0.139962
CHEMBL165	Oc1cc(cc(O)c1)\C=C\c1ccc(O)cc1	7	2.83	5.1549	2.3249	7.28687	17	0.42864
CHEMBL445120	ON\C=N\c1ccc(cc1)Cc1ccccc1	17	2.45	4.76955	2.31955	6.74215	17	0.396597
CHEMBL2036203	O1CCOc2c1cc(cc2)CN(C(=O)CCCC)c1cc(ccc1)-c1[nH]nnn1	0.64	3.88	6.19382	2.31382	8.75547	29	0.301913
CHEMBL485326	o1nc(c2CCc3cc(O)ccc3-c12)CCC(=O)NC=1CCCC=1C(O)=O	47	2.02	4.3279	2.3079	6.11784	27	0.226587
CHEMBL1086657	o1nc(nc1CC(C(=O)NC=1CCCCC=1C(O)=O)(C)C)-c1ncc(O)cc1	39	2.11	4.40894	2.29894	6.23239	28	0.222585
CHEMBL204476	s1c2N(CC(C)C)C(=O)N(C)C(=O)c2c(C(=O)N2C[C@@H](O)CC2)c1Cc1c2c(nccc2)ccc1	6	2.93	5.22185	2.29185	7.38151	35	0.2109
CHEMBL570839	S(=O)(=O)(C)c1ccc(cc1)C(C(=O)c1ccc(F)cc1)Cc1cc(ccc1)-c1cc(cc2c1nccc2)C(S(=O)(=O)C)(C)C	0.2	4.41	6.69897	2.28897	9.46954	44	0.215217
CHEMBL179398	s1c(ccc1C=O)-c1cccnc1	55.2	1.97	4.25806	2.28806	6.01912	13	0.463009
CHEMBL207028	s1c(cc(N)c1C(=O)N)-c1ccccc1	26	2.3	4.58503	2.28503	6.48131	15	0.432087
CHEMBL497828	S(=O)(=O)(C)c1cc2CCC3(Oc2cc1)CCN(CC3)C(=O)c1ccc(cc1)C(F)(F)F	7.6	2.84	5.11919	2.27919	7.23639	31	0.233432
CHEMBL1649667	FC(F)(F)c1nn(c2c1CCCC2)-c1ccc(cc1)C1(CC1)C(=O)N1CCCC1	0.3	4.25	6.52288	2.27288	9.22062	29	0.317952
CHEMBL2392714	FC(F)(F)c1ccccc1CNC(=O)C1CCN(CC1)c1nc(nc(n1)NC)C	25	2.33	4.60206	2.27206	6.50539	29	0.224324
CHEMBL485327	S1c2cc(O)ccc2-n2cc(nc12)CCC(=O)NC=1CCCC=1C(O)=O	12	2.66	4.92082	2.26082	6.95598	26	0.267538
CHEMBL2041176	O(C)c1ncnc(N2C3(CCN(CC3)Cc3ncccc3C)C(=O)N(c3ccc(cc3)-c3ccc(cc3)C#N)C2=O)c1	10	2.74	5	2.26	7.06791	42	0.168284
CHEMBL510171	n12c(nc(C)c1C)C(N[C@@H]1CCc3c1cccc3)=CC(n1ncnc1)=C2	4.6	3.08	5.33724	2.25724	7.54463	26	0.290178
CHEMBL496387	O=C1N(N=CC=C1)C=1C=C(NCc2c(cccc2C)C)c2n(C=1)c(C)c(n2)C	4.2	3.12	5.37675	2.25675	7.60047	28	0.271446
CHEMBL2392711	FC(F)(F)c1ccccc1CNC(=O)C1CCN(CC1)c1nc(nc(n1)NC)N1CCN(CC1)C	16	2.54	4.79588	2.25588	6.77937	35	0.193696
CHEMBL3260740	Clc1ccc(cc1)C=1C=2N(N(Cc3ccc(nc3)C(F)(F)F)C(=O)C=1c1ccncc1)C(=O)N(N=2)C	1.9	3.47	5.72125	2.25125	8.08745	36	0.224651
CHEMBL101296	O\N=C\Nc1ccc(cc1)CC	17	2.52	4.76955	2.24955	6.74215	12	0.561846
CHEMBL517933	Fc1cccc(F)c1C(=O)N(CC(O)(CNC(=O)c1cnn(c1N)-c1ccc(F)cc1)C(F)(F)F)CCO	13	2.64	4.88606	2.24606	6.90684	38	0.181759
CHEMBL521326	Oc1cc2C=Cc3n(nnc3CCC(=O)Nc3ccccc3C(O)=O)-c2cc1	1.5	3.58	5.82391	2.24391	8.23257	28	0.29402
CHEMBL593838	Clc1cc(S(=O)(=O)c2ccccc2F)c(S(=O)(=O)N2CCC(CC2)(CNS(=O)(=O)C(F)(F)F)C#N)cc1	1	3.76	6	2.24	8.48149	37	0.229229
CHEMBL3234568	FC(F)(F)c1nc(N2C[C@@H](CCC2)C(=O)NCCc2ccc(cc2)C#N)cc(n1)N1CCN(CC1)C	4.7	3.09	5.3279	2.2379	7.53142	36	0.209206
CHEMBL2441340	Fc1c2CCN(c2ccc1-c1c2c(ncnc2N)n(c1)C)C(=O)Cc1nc(ccc1)C	24.7	2.37	4.6073	2.2373	6.5128	31	0.21009
CHEMBL2177777	S(=O)(=O)(C)c1cc(F)c(N2CCc3c2ncnc3OC2CCN(CC2)C(OC(C)C)=O)cc1	3	3.3	5.52288	2.22288	7.80704	33	0.236577
CHEMBL2017279	o1nc(C)c(-c2cc3ncc(C(=O)N)c(Nc4ccccc4N4CCOCC4)c3cc2OC)c1C	5.1	3.07	5.29243	2.22243	7.48128	35	0.213751
CHEMBL456350	O(C)c1cc(NC(=O)Nc2cc(ccc2)-c2nn(cc2-c2c3cc[nH]c3ncc2)CC)ccc1	0.31623	4.28	6.5	2.22	9.18827	34	0.270243
CHEMBL1271428	FC(F)(F)c1cccnc1N[C@H]1CCN(C1)C(OC1C2CC3(CC1CC(C3)C2)C(=O)N)=O	8	2.88	5.09691	2.21691	7.2049	32	0.225153
CHEMBL2170643	Fc1ccc(cc1)C(=O)N1CCC(CC1)c1ccc(cc1C(F)(F)F)C(=O)NC(N)=N	8	2.88	5.09691	2.21691	7.2049	31	0.232416
CHEMBL2113208	Clc1ccc(N(S(=O)(=O)c2ccc(OCCOCCOC)cc2)CC(=O)N\N=C/2\c3c(NC\2=O)cccc3)cc1	0.33	4.27	6.48149	2.21149	9.16211	40	0.229053
CHEMBL2392705	FC(F)(F)c1ccccc1CNC(=O)C1CCN(CC1)c1cc(cc(NC)c1)C	2	3.49	5.69897	2.20897	8.05596	29	0.277792
CHEMBL464245	Fc1cccc(F)c1C(=O)N(CC(O)(CNC(=O)c1cnn(c1N)-c1ccc(F)cc1)C(F)(F)F)CCF	4	3.19	5.39794	2.20794	7.63043	38	0.200801
CHEMBL2159071	s1cccc1CN(C(=O)C1(CC1)c1ccc(cc1)C)C	4.5	3.14	5.34679	2.20679	7.55812	20	0.377906
CHEMBL2036017	O(C)c1ccc(cc1)CN(C(=O)CCCC)c1cc(ccc1)-c1[nH]nnn1	0.84	3.87	6.07572	2.20572	8.58853	27	0.318094
CHEMBL520299	o1nc(c2c1c1c(cc(O)cc1)cc2)CCC(=O)Nc1ccccc1C(O)=O	0.99	3.8	6.00436	2.20436	8.48766	28	0.303131
CHEMBL263664	Clc1ccc(cc1)CC1(N)CCN(CC1)c1ncnc2[nH]ccc12	10	2.8	5	2.2	7.06791	24	0.294496
CHEMBL1209016	Clc1ccccc1[C@@H](Oc1cc(sc1C(=O)N)-n1c2c(nc1)cc(cc2)-c1cn(nc1)CCN1CCN(CC1)C)C	0.7	3.96	6.1549	2.1949	8.70045	41	0.212206
CHEMBL2017288	o1nc(C)c(-c2cc3ncc4NC(=O)N(c4c3cc2OC)[C@H](C)c2ccccc2)c1C	1	3.81	6	2.19	8.48149	31	0.273596
CHEMBL3109985	o1c(cnc1C1CC1)-c1ccc(cc1)[C@@H]1[C@H]([C@H]1C(=O)NO)c1ccccc1	23	2.45	4.63827	2.18827	6.55658	27	0.242836
CHEMBL1082684	FC(F)(F)Oc1ccccc1CNC(=O)N1CCC(Oc2ncccn2)CC1	10.2	2.81	4.9914	2.1814	7.05575	28	0.251991
CHEMBL325429	O(CCN(C)C)c1ccc(-n2ccnc2)cc1	40	2.22	4.39794	2.17794	6.21685	17	0.365697
CHEMBL519143	O=C(Nc1cc(cnc1)C)c1cc(NC(=O)c2cc(ccc2)C(C#N)(C)C)ccc1C	1.8	3.57	5.74473	2.17473	8.12064	31	0.261956
CHEMBL2069803	o1nc(nc1C1CCCCC1)-c1ccncc1	17.6	2.58	4.75449	2.17449	6.72085	17	0.395344
CHEMBL397667	Brc1cc(c2nc([nH]c2c1)C=1C(=O)NC=CC=1N[C@@H](Cc1ccccc1)CO)C	0.72	3.97	6.14267	2.17267	8.68316	29	0.299419
CHEMBL271580	Clc1cc(Cl)ccc1Cn1ncc(c1)-c1ccncc1	0.5	4.13	6.30103	2.17103	8.90702	20	0.445351
CHEMBL207100	s1c2N(CC(C)C)C(=O)N(C)C(=O)c2c(C(=O)N2C[C@@H](O)CC2)c1Cc1c2c(cccc2)cnc1	13	2.72	4.88606	2.16606	6.90684	35	0.197338
CHEMBL238103	O(C)c1c2c([nH]cc2C(=O)C(=O)N2CCN(CC2)C(=O)c2ccccc2)c(OC)nc1	30	2.36	4.52288	2.16288	6.39346	31	0.206241
CHEMBL384536	s1c2N(CC(C)C)C(=O)N(C)C(=O)c2c(C(=O)N2OC[C@@H](O)C2)c1Cc1c2cccnc2[nH]c1	17	2.61	4.76955	2.15955	6.74215	34	0.198298
CHEMBL2392715	FC(F)(F)c1ccccc1CNC(=O)C1CCN(CC1)c1nc(nc(n1)NC)CC	9.6	2.86	5.01773	2.15773	7.09297	30	0.236432
CHEMBL942	O(C(=O)C)c1ccc(cc1)C(c1ccc(OC(=O)C)cc1)c1ncccc1	10	2.85	5	2.15	7.06791	27	0.261774
CHEMBL483353	o1nc(c2CCc3cc(O)ccc3-c12)CCC(=O)Nc1ccccc1C(O)=O	2.2	3.51	5.65758	2.14758	7.99745	28	0.285623
CHEMBL1271218	FC(F)(F)c1cccnc1N[C@@H]1CCN(C1)C(OC1C2CC3(CC1CC(C3)C2)C(=O)N)=O	9.4	2.88	5.02687	2.14687	7.10589	32	0.222059
CHEMBL594300	Clc1cc(S(=O)(=O)c2ccccc2F)c(S(=O)(=O)N2CCC(CC2)(CNS(=O)(=O)C(F)(F)F)CO)cc1	1	3.86	6	2.14	8.48149	37	0.229229
CHEMBL2436616	FC1(CCN(CC1)Cc1cc(ncc1)N)C(=O)N1CCC(N2Cc3c(Cc4c2cccc4)cccc3)CC1	4	3.27	5.39794	2.12794	7.63043	38	0.200801
CHEMBL520276	Clc1cccnc1C(=O)N(CC(O)(CNC(=O)c1cnn(c1N)-c1ccc(F)cc1)C(F)(F)F)CC	14	2.73	4.85387	2.12387	6.86134	36	0.190593
CHEMBL521355	Clc1cc(N2CCN(CC2)C(=O)c2sc(cc2)C(=O)C(F)(F)F)c(OC)cc1	1.8	3.63	5.74473	2.11473	8.12064	28	0.290023
CHEMBL193306	Fc1cc(F)c(NC2=NC=Nn3c2c(C(C)C)c(c3)-c2oc(cn2)C)cc1C(=O)NOC	3.6	3.33	5.4437	2.1137	7.69511	32	0.240472
CHEMBL103320	O\N=C\Nc1ccc(cc1)C	79	1.99	4.10237	2.11237	5.79904	11	0.527185
CHEMBL1649655	S(=O)(=O)(N(C)C)c1ccc(-n2nc(c3CCCCc23)C(F)(F)F)cc1	2	3.59	5.69897	2.10897	8.05596	25	0.322238
CHEMBL195217	Oc1cc(ccc1)-c1cc2c(cc(O)cc2)cc1	1.05	3.87	5.97881	2.10881	8.45154	18	0.46953
CHEMBL590835	Clc1cc(N(Cc2ccccc2C#N)[C@H]2CCN(S(=O)(=O)C)C2)ccc1C#N	1.5	3.72	5.82391	2.10391	8.23257	28	0.29402
CHEMBL2018482	Fc1ccc(Oc2ccc(NC(=O)[C@H]3N(C[C@@H](C3)c3ccccc3)C(=O)Cc3[nH]cnc3)cc2)cc1	0.213	4.57	6.67162	2.10162	9.43088	36	0.261969
CHEMBL1917511	s1cc(nc1NC(=O)c1n(nc(c1)C(C)(C)C)Cc1ccccc1)CN	10	2.9	5	2.1	7.06791	26	0.271843
CHEMBL219483	s1c2N(CC(C)C)C(=O)N(C)C(=O)c2c(C(=O)N2CCC2)c1Cn1c2c(nc1NC)cccc2	8.9	2.96	5.05061	2.09061	7.13945	34	0.209984
CHEMBL597211	[nH]1c2ncnc(N3CCC(N)(CC3)Cc3ccc(cc3)C(C)(C)C)c2cc1	1	3.91	6	2.09	8.48149	27	0.314129
CHEMBL478649	O=C(NC1CC1)c1cc(-c2ccc(cc2)C(=O)NCC2CC2)c(cc1)C	3.98107	3.32	5.4	2.08	7.63334	26	0.29359
CHEMBL3115188	s1cncc1COC(=O)N[C@@H](Cc1ccccc1)CC[C@@H](NC(=O)[C@@H](NC(=O)N(Cc1nc(sc1)C(C)C)C)CCNC(=O)C)Cc1ccccc1	15.5	2.73	4.80967	2.07967	6.79886	52	0.130747
CHEMBL2017287	o1nc(C)c(-c2cc3ncc4NC(=O)N(c4c3cc2OC)C(C)c2ccccc2)c1C	1.3	3.81	5.88606	2.07606	8.32042	31	0.268401
CHEMBL270193	Fc1cc(F)c(NC2=NC=Nn3c2c(C(C)C)c(c3)-c2oc(nn2)NCCCCN)cc1C(=O)NC1CC1	21	2.61	4.67778	2.06778	6.61242	38	0.174011
CHEMBL1784164	Fc1cc(cc(-c2ccc(cc2)C(=O)NCC2CC2)c1C)C(=O)NC1CC1	1.99526	3.64	5.7	2.06	8.05742	27	0.298423
CHEMBL464907	Fc1cccc(F)c1C(=O)N(CC(O)(CNC(=O)c1cnn(c1N)-c1ccc(F)cc1)C(F)(F)F)C	10	2.94	5	2.06	7.06791	36	0.196331
CHEMBL496806	O=C1NC(=O)NC=C1C=1C=C(NCc2c(cccc2C)C)c2n(C=1)c(C)c(n2)C	3.4	3.41	5.46852	2.05852	7.7302	29	0.266559
CHEMBL375166	s1c2N(CC(C)C)C(=O)N(C)C(=O)c2c(C(=O)N2OC[C@@H](O)C2)c1Cc1c(n[nH]c1C)C	23	2.58	4.63827	2.05827	6.55658	32	0.204893
CHEMBL1649670	FC(F)(F)c1nn(c2c1CCCC2)-c1ccc(cc1)CN1CCCC1=O	5	3.25	5.30103	2.05103	7.49344	26	0.288209
CHEMBL218628	s1c2N(CC(C)C)C(=O)N(C)C(=O)c2c(C(=O)N2OC[C@@H](O)C2)c1Cn1c2c(nc1NC)cccc2	9.1	2.99	5.04096	2.05096	7.12581	36	0.197939
CHEMBL483139	o1nc(c2c1c1c(cc(O)cc1)cc2)CCC(=O)NC=1CCCCC=1C(O)=O	12	2.87	4.92082	2.05082	6.95598	28	0.248428
CHEMBL576093	o1c2c(cc1C)cc(N\C(=N\C(=O)c1ccc(nc1)C(=O)N)\N[C@H]1CCCCN(CC(=O)N3CCCC3)C1=O)cc2	22	2.61	4.65758	2.04758	6.58386	41	0.160582
CHEMBL237248	o1nc(nc1CCC(=O)Nc1ccccc1C(O)=O)-c1ncc(O)cc1	42	2.33	4.37675	2.04675	6.18689	26	0.237957
CHEMBL2011118	FC(F)(F)Oc1ccc(cc1)[C@H](Nc1nc(nc2c1CN(C(C)C)C2=O)N1CCN(CC1)C(=O)C)C	7.3	3.09	5.13668	2.04668	7.26111	36	0.201698
CHEMBL271579	BrC1CC(OC1)(Cn1ncnc1)c1ccc(Cl)cc1Cl	8.1	3.05	5.09152	2.04151	7.19727	20	0.359864
CHEMBL3261331	Clc1cc(N2N=C(C#N)C(=O)NC2=O)cc(Cl)c1OC1=NNC(=O)C(=C1)C(C)C	22	2.62	4.65758	2.03758	6.58386	29	0.22703
CHEMBL1277677	Clc1ccccc1N1NC=2C(=C(N(Cc3ccncc3)C(=O)C=2)CN(C)c2ccccc2)C1=O	4.1	3.35	5.38722	2.03722	7.61527	34	0.223978
CHEMBL1172744	O(C[C@]12C[C@]1(CCNC2)c1cc2c(cc1)cccc2)C	8	3.06	5.09691	2.03691	7.2049	20	0.360245
CHEMBL496606	n12c(nc(C)c1C)C(NCc1c(cccc1C)C)=CC(n1ncnc1)=C2	2.5	3.57	5.60206	2.03206	7.91897	26	0.304576
CHEMBL391963	FC(F)(F)c1cc(cc(c1)C(F)(F)F)CN(C(=O)[C@H]1CN(C[C@@H]1c1ccccc1)C(=O)C1CCN(CC1)C(=O)C)C	26	2.56	4.58503	2.02503	6.48131	41	0.158081
CHEMBL493001	O(C)c1cc(cc(OC)c1O)\C=C\C(=O)\C=C\c1cc(OC)c(O)c(OC)c1	59	2.21	4.22915	2.01915	5.97824	28	0.213509
CHEMBL1223034	Brc1ccc(cc1)-c1n(nc(-c2sc(nn2)C(C)(C)C)c1Cn1ncnc1)-c1ccc(Cl)cc1Cl	0.0026	6.57	8.58503	2.01503	12.1356	35	0.346732
CHEMBL189785	FC(F)(F)Oc1cc2c([nH]c(C)c2Cc2cc(O[C@H](C(O)=O)C)ccc2)cc1	0.05	5.29	7.30103	2.01103	10.3206	28	0.368593
CHEMBL590600	FC(F)(F)Oc1ccc(NC(=O)N2CCC(n3cccc3)CC2)cc1	11	2.95	4.95861	2.00861	7.0094	25	0.280376
CHEMBL362702	s1c(ccc1C(=O)C)-c1cccnc1	98.2	2	4.00789	2.00789	5.66548	14	0.404677
CHEMBL2178221	Clc1ccc(NC(=O)[C@H]2CN(C[C@@H]2c2ccc(cc2)\C=C\C(=O)Nc2ccccc2N)CCO)cc1	3	3.52	5.52288	2.00288	7.80704	36	0.216862
CHEMBL1428	O(C(=O)C=1C(C(C(OCCOC)=O)=C(NC=1C)C)c1cc([N+](=O)[O-])ccc1)C(C)C	1	4	6	2	8.48149	30	0.282716
CHEMBL227855	O1C2(OOC13CCC(CC3)CN)C1CC3CC2CC(C1)C3	17	2.77	4.76955	1.99955	6.74215	21	0.321055
CHEMBL1784171	Fc1cc(cc(-c2ccc(cc2)C(=O)NCC(O)(C)C)c1C)C(=O)NC1CC1	15.8489	2.81	4.8	1.99	6.78519	28	0.242328
CHEMBL317798	O(CCC)c1ccc(N\C=N\O)cc1	35	2.47	4.45593	1.98593	6.29882	14	0.449916
CHEMBL477563	S(=O)(=O)(N)c1cc(Nc2nc(N(C)c3cc4nc(n(c4cc3)C)C)ccn2)ccc1	9	3.06	5.04576	1.98576	7.13259	30	0.237753
CHEMBL332994	S(=O)(=O)(Nc1n(ncc1)-c1ccccc1)c1ccc(cc1)CC=C	1	4.02	6	1.98	8.48149	24	0.353395
CHEMBL379399	s1c2N(CC(C)C)C(=O)N(C)C(=O)c2c(S(=O)(=O)[C@H]2C[C@@H](O)CC2)c1Cc1ccccc1C(F)(F)F	0.2	4.72	6.69897	1.97897	9.46954	36	0.263043
CHEMBL1649663	FC(F)(F)c1nn(c2c1CCCC2)-c1ccc(cc1)CC(=O)N(C)C	7	3.18	5.1549	1.9749	7.28687	25	0.291475
CHEMBL556716	S(=O)(=O)(C)c1ccc(cc1)C(CCNC(=O)c1ccc(cc1)C#N)c1ccc(F)cc1	7	3.18	5.1549	1.9749	7.28687	31	0.23506
CHEMBL1084349	Clc1cc2c(NC(=O)[C@@]23N[C@H](Cc2c3[nH]c3c2cc(F)cc3)C)cc1	1.72	3.79	5.76447	1.97447	8.14855	25	0.325942
CHEMBL482980	o1nc(c2Cc3cc(O)ccc3-c12)CCC(=O)Nc1ccccc1C(O)=O	8.5	3.11	5.07058	1.96058	7.16768	27	0.26547
CHEMBL563664	S(=O)(=O)(N(C)[C@H]1CC=2C3C(N(C=2CC1)CC(O)=O)C=CC=C3)c1ccc(F)cc1	18	2.79	4.74473	1.95473	6.70706	29	0.231278
CHEMBL1552719	S(Cc1onc(n1)-c1ccc(cc1)C)c1nnc(n1-c1ccc(OC)cc1)-c1ccncc1	0.99	4.05	6.00436	1.95436	8.48766	33	0.257202
CHEMBL150799	o1nccc1-c1ccccc1OCCCC	6.09	3.27	5.21538	1.94538	7.37237	16	0.460773
CHEMBL409494	Fc1ccccc1NC(=O)CCN1CCC(CC1)c1ccc(cc1)C(=O)Nc1ccccc1N	10	3.06	5	1.94	7.06791	34	0.20788
CHEMBL317935	O1CCN(CC1)c1cc(ccc1)[C@@H](NC(=O)\C=C\c1ccccc1)C	5.3	3.34	5.27572	1.93572	7.45767	25	0.298307
CHEMBL1210423	S(C(C)(C)C)c1c2cc(OCc3ncc(cc3)C)ccc2n(Cc2ccc(cc2)-c2ncc(OC)cn2)c1CC(C(=O)[O-])(C)C.[Na+]	4.5	3.42	5.34679	1.92679	7.55812	46	0.164307
CHEMBL226385	Clc1cc(Nc2nc(C(F)(F)F)c(cn2)C(=O)NCC2CCOCC2)ccc1	18	2.82	4.74473	1.92473	6.70706	28	0.239538
CHEMBL391070	O(C)c1cc2CCN3[C@@H](C[C@@H](N)[C@@H](C3)c3cc(ccc3)C)c2cc1OC	15	2.9	4.82391	1.92391	6.81899	26	0.262269
CHEMBL456379	s1c(cnc1-c1cc(O)ccc1)-c1cc(O)ccc1	2.1	3.76	5.67778	1.91778	8.026	19	0.422421
CHEMBL2017275	o1nc(C)c(-c2cc3ncc(C(=O)N)c(Nc4ccccc4CCN4CCOCC4)c3cc2OC)c1C	2.2	3.74	5.65758	1.91758	7.99745	37	0.216147
CHEMBL114297	O(CCCN(C)C)c1ccc(-n2ccnc2)cc1	32.8	2.57	4.48413	1.91413	6.33868	18	0.352149
CHEMBL460178	O(C)C1CCc2cc(ccc2C1)-c1cccnc1	16.3	2.88	4.78781	1.90781	6.76796	18	0.375998
CHEMBL100917	ON\C=N\c1ccccc1CCCC	42	2.47	4.37675	1.90675	6.18689	14	0.441921
CHEMBL2385906	OC(=O)Cn1c2CCN(Cc2c2c1cccc2)C(=O)c1ccccc1	15	2.92	4.82391	1.90391	6.81899	25	0.272759
CHEMBL2018913	S(CCCO)c1[nH]c2c(n1)cc(OC)cc2	50	2.4	4.30103	1.90103	6.07986	16	0.379991
CHEMBL1204128	Cl.S(=O)(=O)(C)c1ccc(cc1)C(F)(C(O)(C1CC1)C1CC1)Cc1cc(ccc1)-c1cc(cc2c1nccc2)C(S(=O)(=O)C)(C)C	2.1	3.79	5.67778	1.88778	8.026	45	0.178356
CHEMBL2407717	S1C[C@@H](N=C1NCc1ccc(cc1)C(=O)Nc1ccccc1N)c1ccccc1	16	2.91	4.79588	1.88588	6.77937	29	0.233771
CHEMBL392465	Fc1cc(C)c(cc1)[C@H]1CN(C[C@@H]1c1nc(on1)C(C)(C)c1cc(cc(c1)C(F)(F)F)C(F)(F)F)C(=O)C1CCN(CC1)C(=O)C	9	3.16	5.04576	1.88576	7.13259	46	0.155056
CHEMBL475817	Clc1ccc(NC(=O)c2cc(ccc2)C(F)(F)F)cc1C(=O)Nc1cc(Cl)c(nc1)N	0.7	4.27	6.1549	1.8849	8.70045	31	0.28066
CHEMBL494713	O(C)c1ccc(cc1)Cc1cc2cc(OC)ccc2cc1-c1cccnc1	0.064	5.31	7.19382	1.88382	10.1691	27	0.376632
CHEMBL321051	O\N=C\Nc1ccc(cc1)CCCCCC	0.3	4.64	6.52288	1.88288	9.22062	16	0.576289
CHEMBL2017281	o1nc(C)c(-c2cc3ncc(C(=O)N)c(Nc4c5ncccc5ccc4)c3cc2OC)c1C	2.8	3.67	5.55284	1.88284	7.84939	33	0.23786
CHEMBL1085743	Fc1ccc(cc1)C(CCNC(=O)N1CC(CC1)c1nccnc1)c1ccc(F)cc1	8.1	3.21	5.09152	1.88152	7.19727	31	0.23217
CHEMBL252556	O(C)C=1C(=O)C(CCCCCCCCCCO)=C(C)C(=O)C=1OC	5	3.42	5.30103	1.88103	7.49344	24	0.312227
CHEMBL523563	O=C1N(C=NC=C1)C=1C=C(NCc2c(cccc2C)C)c2n(C=1)c(C)c(n2)C	4.7	3.45	5.3279	1.8779	7.53142	28	0.268979
CHEMBL2011122	FC(F)(F)[C@@H](Nc1nc(nc2c1CN(C(C)C)C2=O)N1CCN(CC1)C(=O)C)c1ccc(OCC)cc1	14	2.98	4.85387	1.87387	6.86134	37	0.185442
CHEMBL2011112	Clc1ccc(cc1)CC(Nc1nc(nc2c1CN(C(C)C)C2=O)N1CCN(CC1)C(=O)C)(C)C	2	3.83	5.69897	1.86897	8.05596	34	0.23694
CHEMBL205742	s1c2N(CC(C)C)C(=O)N(C)C(=O)c2c(C(=O)N2C[C@@H](O)CC2)c1Cc1c2c(ncc1)cccc2	16	2.93	4.79588	1.86588	6.77937	35	0.193696
CHEMBL1086567	OC(=O)c1ccccc1NC(=O)CCc1nn(cc1)-c1ccccc1	2.5	3.75	5.60206	1.85206	7.91897	25	0.316759
CHEMBL593490	o1cc(cc1)-c1ncc(OC[C@@H](N)Cc2c3c([nH]c2)cccc3)cc1-c1cc2c(n[nH]c2C)cc1	0.5	4.45	6.30103	1.85103	8.90702	35	0.254486
CHEMBL271120	n1c(cc(nc1-c1cccnc1)NCc1ncc(cn1)C)-c1ccccc1	21	2.83	4.67778	1.84778	6.61242	27	0.244905
CHEMBL237247	s1c(cnc1CCC(=O)Nc1ccccc1C(O)=O)-c1ncc(O)cc1	4.2	3.53	5.37675	1.84675	7.60047	26	0.292326
CHEMBL2392712	FC(F)(F)c1ccccc1CNC(=O)C1CCN(CC1)c1nc(nc(n1)NC)NC	25	2.76	4.60206	1.84206	6.50539	30	0.216846
CHEMBL150278	O(CCCC)c1ccc(cc1)-c1nn[nH]n1	10.2	3.15	4.9914	1.8414	7.05575	16	0.440984
CHEMBL593595	Clc1cc(S(=O)(=O)c2ccccc2F)c(S(=O)(=O)N2CCC(CC2)(C(O)C)CNS(=O)(=O)C(F)(F)F)cc1	1	4.16	6	1.84	8.48149	38	0.223197
CHEMBL208487	s1c2N(CC(C)C)C(=O)N(C)C(=O)c2c(C(=O)N2C[C@@H](O)CC2)c1Cc1ccccc1C(F)(F)F	1.7	3.93	5.76955	1.83955	8.15573	35	0.233021
CHEMBL413	O1[C@@H](CC(=O)[C@@H](\C=C(/C)\[C@@H](O)[C@@H](OC)C(=O)[C@@H](C[C@@H](\C=C\C=C\C=C(/C)\[C@@H](OC)C[C@H]2O[C@](O)([C@@H](CC2)C)C(=O)C(=O)N2[C@@H](CCCC2)C1=O)C)C)C)[C@@H](C[C@H]1C[C@@H](OC)[C@H](O)CC1)C	2	3.86	5.69897	1.83897	8.05596	65	0.123938
CHEMBL1079246	Clc1ccc(NC(=O)N2CC(CCC2)(CCC(=O)NC)c2ccccc2)cc1	10	3.17	5	1.83	7.06791	28	0.252425
CHEMBL3092195	S(=O)(=O)(Nc1cccc(CC=2C(Oc3c(ccc(Oc4ncccn4)c3)C=2C)=O)c1F)NC	19	2.9	4.72125	1.82125	6.67387	33	0.202238
CHEMBL2441342	Fc1c2CCN(c2ccc1-c1c2c(ncnc2N)n(c1)C)C(=O)Cc1nc(ccc1)C(F)(F)F	19.2	2.9	4.7167	1.8167	6.66744	34	0.196101
CHEMBL388590	Brc1cc(cc(Br)c1O)C(=O)c1c2c(oc1CC)cccc2	0.016	5.98	7.79588	1.81588	11.0201	22	0.500914
CHEMBL2392694	FC(F)(F)c1ccccc1CNC(=O)C1CCN(CC1)c1nc(nc(n1)NC)-c1ccccc1	1.8	3.93	5.74473	1.81473	8.12064	34	0.238842
CHEMBL2041173	O(C)c1ncnc(N2C3(CCN(CC3)Cc3ncccc3C)C(=O)N(c3ccc(cc3)-c3cc4c([nH]nc4)cc3)C2=O)c1	25	2.79	4.60206	1.81206	6.50539	43	0.151288
CHEMBL1173532	Clc1cc(ccc1Cl)[C@@]12C[C@@]1(CNCC2)COC	10	3.19	5	1.81	7.06791	18	0.392662
CHEMBL596135	S(=O)(=O)(c1ccc(cc1S(=O)(=O)N1CCC2(CC2NS(=O)(=O)C(F)(F)F)CC1)C(F)(F)F)c1ncccc1	1	4.19	6	1.81	8.48149	38	0.223197
CHEMBL475799	Clc1cc(NC(=O)c2cc(NC(=O)c3cc(ccc3)C(C#N)(C)C)ccc2C)cnc1N	4	3.59	5.39794	1.80794	7.63043	32	0.238451
CHEMBL111	Clc1cc(Cl)ccc1-n1nc(C(=O)NN2CCCCC2)c(C)c1-c1ccc(Cl)cc1	0.0053	6.47	8.27572	1.80572	11.6984	30	0.389947
CHEMBL361153	s1cc(cc1)-c1cccnc1	96.3	2.22	4.01637	1.79637	5.67747	11	0.516134
CHEMBL242983	O(C)c1cc(C(=O)Nc2ccc(N3CCN(CC3)Cc3cc(OC)c(OC)cc3)cc2)c(NC(=O)c2cc3c(nc2)cccc3)cc1OC	0.0968	5.22	7.01412	1.79412	9.91504	49	0.202348
CHEMBL2041174	O(C)c1ncnc(N2C3(CCN(CC3)Cc3ncccc3C)C(=O)N(c3ccc(cc3)-c3cc4[nH]cnc4cc3)C2=O)c1	30	2.73	4.52288	1.79288	6.39346	43	0.148685
CHEMBL1649666	FC(F)(F)c1nn(c2c1CCCC2)-c1ccc(cc1)C(C(=O)N1CCCC1)C	1	4.21	6	1.79	8.48149	28	0.30291
CHEMBL2017089	o1nc(C)c(-c2cc3ncc(C(=O)N)c(Nc4ccccc4)c3cc2)c1C	2.1	3.89	5.67778	1.78778	8.026	27	0.297259
CHEMBL231510	Clc1cc(ccc1)C(O)CNC=1C=CNC(=O)C=1c1[nH]c2c(n1)c(cc(c2)C(=O)NC1CC1)C	8.1	3.31	5.09152	1.78151	7.19727	34	0.211684
CHEMBL121241	S(=O)(=O)(N(CCCO)c1n(ncc1)-c1ccccc1)c1ccc(cc1)CCCN	50	2.52	4.30103	1.78103	6.07986	29	0.20965
CHEMBL1209674	Clc1ccccc1[C@@H](Oc1cc(sc1C(=O)N)-n1c2c(nc1)cc(cc2)-c1ccncc1)C	0.1	5.22	7	1.78	9.89507	33	0.299851
CHEMBL1650652	Oc1ccc2c(ccc(c2)-c2cc(O)ccc2)c1-c1cc(O)ccc1	0.27	4.79	6.56864	1.77864	9.2853	25	0.371412
CHEMBL1830424	O=C(NO)\C=C\c1cc2nc(n(c2cc1)CCN(C)C)CCCCCC	10.4	3.21	4.98297	1.77297	7.04383	26	0.270916
CHEMBL578413	Clc1ccccc1C1CC(=O)Nc2sc3c(nc(N)c(C#N)c3C)c12	1.25893	4.13	5.9	1.77	8.34013	25	0.333605
CHEMBL475045	O=C(Nc1ccc(nc1)NC)c1cc(NC(=O)c2cc(ccc2)C(C#N)(C)C)ccc1C	4.9	3.54	5.3098	1.7698	7.50584	32	0.234558
CHEMBL1208963	Clc1ccccc1[C@@H](Oc1cc(sc1C(=O)N)-n1c2c(nc1)cc(cc2)-c1cc(ncc1)NCCO)C	0.2	4.93	6.69897	1.76897	9.46954	37	0.255933
CHEMBL478612	S(=O)(=O)(N)c1cc(Nc2nc(N(C)c3cc4n(C)c(nc4cc3)C)ccn2)ccc1	15	3.06	4.82391	1.76391	6.81899	30	0.2273
CHEMBL1204129	ClC.S(=O)(=O)(C)c1ccc(cc1)C(F)(C(O)(C1CC1)C1CC1)Cc1cc(ccc1)-c1cc(cc2c1nccc2)C(S(=O)(=O)C)(C)C	2.8	3.79	5.55284	1.76284	7.84939	46	0.170639
CHEMBL1951022	S(=O)(=O)(C)c1nc(C)c(Nc2ncnc(OC3CCN(CC3)C(OC(C)C)=O)c2C)cc1	2.5	3.84	5.60206	1.76206	7.91897	32	0.247468
CHEMBL1909050	O=C(N1CCC(CC1)Cc1ccccc1)c1ccccc1C	1	4.24	6	1.76	8.48149	22	0.385522
CHEMBL407828	FC(F)(F)CNC(=O)[C@H]1N(CCN(C1)C(C)(C)c1oc(cc1)-c1ccncc1)C[C@@H](O)C[C@@H](Cc1ccccc1)C(=O)NC1C2C(OC[C@H]1O)C=CC=C2	0.41	4.64	6.38722	1.74722	9.02885	54	0.167201
CHEMBL1934810	Brc1cc2NC(=O)c3nc([nH]c3-c2cc1)-c1ccccc1Cl	0.7	4.41	6.1549	1.7449	8.70045	22	0.395475
CHEMBL465451	Clc1cccc(Cl)c1C(=O)N(CC(O)(CNC(=O)c1cnn(c1N)-c1ccc(F)cc1)C(F)(F)F)CCO	3	3.78	5.52288	1.74288	7.80704	38	0.205448
CHEMBL2205775	O(C(=O)C(C(n1ncnc1)c1ccc(Nc2ccccc2)cc1)(C)C)C	9.1	3.3	5.04096	1.74096	7.12581	26	0.274069
CHEMBL1909049	O(C)c1ccccc1C(=O)N1CCC(CC1)Cc1ccccc1	2	3.96	5.69897	1.73897	8.05596	23	0.350259
CHEMBL437002	Fc1ccccc1C(=O)N1CCC(CC1)Cc1ccccc1	2	3.96	5.69897	1.73897	8.05596	22	0.36618
CHEMBL3104250	Clc1cc(/C(=N\NC(=O)c2cc(S(=O)(=O)N3CCOCC3)ccc2)/C)c(O)cc1	8.04	3.36	5.09474	1.73474	7.20184	29	0.248339
CHEMBL2392713	FC(F)(F)c1ccccc1CNC(=O)C1CCN(CC1)c1nc(nc(n1)NC)N(CCN(C)C)C	17	3.04	4.76955	1.72955	6.74215	35	0.192633
CHEMBL2425952	O=C1N(CCc2ccccc2)C(=Nc2c1cccc2Cc1ccc(cc1)C(=O)NO)CC	2.1	3.95	5.67778	1.72778	8.026	32	0.250813
CHEMBL1269176	OC1C2CC3CC1CC(C2)C3	22	2.93	4.65758	1.72758	6.58386	11	0.598533
CHEMBL117	O1c2c(C(=O)C=C1c1ccccc1)c(O)cc(O)c2	5.225	3.56	5.28191	1.72191	7.46641	19	0.392969
CHEMBL496189	O1c2c(cccc2)C(=O)CC12CCN(CC2)C(=O)N[C@H]1C[C@@H]1c1ccccc1	10	3.28	5	1.72	7.06791	28	0.252425
CHEMBL3092189	S(=O)(=O)(Nc1cc(ccc1)CC=1C(Oc2c(ccc(OC(=O)N(C)C)c2)C=1C)=O)NC	29	2.82	4.5376	1.7176	6.41427	31	0.206912
CHEMBL1210552	S(CCCN1CC2(C(C2)C1)c1ccc(S(F)(F)(F)(F)F)cc1)c1nnc(n1C)-c1ocnc1C	9	3.33	5.04576	1.71576	7.13259	34	0.209782
CHEMBL237037	s1c(ncc1CCC(=O)Nc1ccccc1C(O)=O)-c1ncc(O)cc1	5.7	3.53	5.24413	1.71413	7.413	26	0.285115
CHEMBL593763	Clc1cc(ccc1)COc1cc2OC(=O)C=C(c2cc1)CNC.S(O)(=O)(=O)C	5	3.59	5.30103	1.71103	7.49344	28	0.267623
CHEMBL495786	O=C1C=CN(C=C1)C=1C=C(NCc2c(cccc2C)C)c2n(C=1)c(C)c(n2)C	17	3.06	4.76955	1.70955	6.74215	28	0.240791
CHEMBL2419485	Clc1ccc(cc1)CS(=O)(=O)NC(=O)C1CN(C1)c1nc(C)c(cc1C#N)C(OCC)=O	7.1	3.44	5.14874	1.70874	7.27817	32	0.227443
CHEMBL348263	O(CCCC)c1ccc(N\C=N/O)cc1	19.9	3	4.70115	1.70115	6.64545	15	0.44303
CHEMBL1269858	O1CCN(CC1)c1cc(N2CCOCC2)cc(Nc2nc(N(C)c3c4c([nH]nc4)ccc3)ccn2)c1	5	3.6	5.30103	1.70103	7.49344	36	0.208151
CHEMBL520513	S1c2cc(O)ccc2-n2cc(nc12)CCC(=O)NC=1CCCCC=1C(O)=O	12	3.22	4.92082	1.70082	6.95598	27	0.257629
CHEMBL2017280	o1nc(C)c(-c2cc3ncc(C(=O)N)c(Nc4ccccc4C(=O)N4CCCCC4)c3cc2OC)c1C	8.5	3.37	5.07058	1.70058	7.16768	37	0.193721
CHEMBL2017277	o1nc(C)c(-c2cc3ncc(C(=O)N)c(NC4CCCCC4)c3cc2OC)c1C	4.3	3.67	5.36653	1.69653	7.58603	29	0.261587
CHEMBL191	Clc1nc(n(Cc2ccc(cc2)-c2ccccc2-c2[nH]nnn2)c1CO)CCCC	2.882	3.85	5.54031	1.69031	7.83167	30	0.261056
CHEMBL576094	o1c2c(cc1C)cc(N\C(=N/C(=O)c1ccc(nc1)C(=O)NC)\N[C@H]1CCCCN(CC(=O)N3CCCC3)C1=O)cc2	24	2.93	4.61979	1.68979	6.53045	42	0.155487
CHEMBL569185	S(=O)(=O)(NN1C[C@@H](N(CCc2ccc(OC)cc2)C1=O)c1ccc(OC)cc1)C	47	2.64	4.3279	1.6879	6.11784	29	0.21096
CHEMBL1171204	o1cccc1CNC(=O)c1[nH]cc(c1)C(=O)c1ccccc1C	15.8	3.12	4.80134	1.68134	6.78709	23	0.295091
CHEMBL565361	O1OC2(CC1(CC(=O)NCc1cc(OC)ccc1)C)CCCCC2	4.2	3.7	5.37675	1.67675	7.60047	24	0.316686
CHEMBL2415098	FC(F)(F)c1ccccc1[C@@H]1OCCn2nc(nc12)-c1cc(OC)c(-n2cc(nc2)C)cc1	8.43	3.4	5.07417	1.67417	7.17276	33	0.217356
CHEMBL447591	O(C)c1cc2c(cc(cc2)-c2cc(OC)cnc2)cc1	1.888	4.05	5.724	1.674	8.09134	20	0.404567
CHEMBL1650654	Oc1ccc2c(ccc(c2)-c2cc(O)ccc2)c1-c1cc(N)ccc1	1.25	4.23	5.90309	1.67309	8.3445	25	0.33378
CHEMBL2407900	O(C)c1cc\2c(NC(=O)/C/2=C\c2cc3[nH]nc(c3cc2)\C=C\c2ccc(nc2)N2CCN(CC2)C)cc1	0.8	4.43	6.09691	1.66691	8.61848	37	0.232932
CHEMBL2448576	O(C)c1nc2c(cc1-c1[nH]c(nc1)[C@@H](NC(=O)C1CN(C1)C)CCCCCC(=O)CC)cccc2	5.5	3.6	5.25964	1.65964	7.43493	35	0.212426
CHEMBL477145	Clc1ccc(CC2=NNC(=O)C(=C2)C)c(F)c1Oc1cc(cc(F)c1)C#N	8	3.44	5.09691	1.65691	7.2049	27	0.266848
CHEMBL387125	Clc1n(Cc2sc3N(CC(C)C)C(=O)N(C)C(=O)c3c2C(=O)N(OC)C)c(nc1Cl)C	15	3.17	4.82391	1.65391	6.81899	31	0.219967
CHEMBL497011	OCCNC(=O)C=1C=C(NCc2c(cccc2C)C)c2n(C=1)c(C)c(n2)C	14	3.2	4.85387	1.65387	6.86134	27	0.254124
CHEMBL498252	n12C=C(n3ncnc3)C=3CC[C@@H](NC=3c1nc(C)c2C)c1ccccc1	14	3.2	4.85387	1.65387	6.86134	26	0.263898
CHEMBL1208835	s1c(C(=O)N)c(O[C@@H](C)c2ccccc2C(F)(F)F)cc1-n1c2c(nc1)cc(cc2)-c1cc(ncc1)N	0.2	5.06	6.69897	1.63897	9.46954	37	0.255933
CHEMBL1649674	Fc1cc(-n2nc(c3CCCCc23)C(F)(F)F)ccc1CN1CCCC1=O	9	3.41	5.04576	1.63576	7.13259	27	0.26417
CHEMBL571060	S(=O)(=O)(C)c1ccc(cc1)C(F)(C(O)(C1CC1)C1CC1)Cc1cc(ccc1)-c1cc(cc2c1nccc2)C(S(=O)(=O)C)(C)C	3.8	3.79	5.42022	1.63022	7.66192	44	0.174134
CHEMBL2170747	s1c2cc(O)ccc2nc1NC(=O)c1c(F)c(O)ccc1F	54	2.64	4.26761	1.62761	6.03261	22	0.274209
CHEMBL467633	Fc1cccc(F)c1C(=O)N(CC(O)(CNC(=O)c1cnn(c1N)-c1ccc(F)cc1)C(F)(F)F)CC	8	3.47	5.09691	1.62691	7.2049	37	0.194727
CHEMBL1649664	FC(F)(F)c1nn(c2c1CCCC2)-c1ccc(cc1)CC(=O)N1CCCC1	3	3.9	5.52288	1.62288	7.80704	27	0.28915
CHEMBL218573	s1c2N(CC(C)C)C(=O)N(C)C(=O)c2c(C(=O)N2OC[C@@H](O)C2)c1Cc1ccccc1C(F)(F)F	0.83	4.46	6.08092	1.62092	8.59588	35	0.245597
CHEMBL271622	S(=O)(=O)(NCc1onc(c1)-c1ccc(OC)cc1)c1ccccc1	39	2.79	4.40894	1.61894	6.23239	24	0.259683
CHEMBL3260741	Clc1ccc(cc1)C=1C=2N(N(Cc3ccc(nc3C)C(F)(F)F)C(=O)C=1c1ccncc1)C(=O)N(N=2)C	2.9	3.92	5.5376	1.6176	7.82785	37	0.211564
CHEMBL1836215	o1nc(nc1-c1cc(C#N)c(OC(C)C)cc1)-c1ccc2c(CCN(C2)C(CO)CO)c1C	4.3	3.75	5.36653	1.61653	7.58603	33	0.22988
CHEMBL495793	O1c2c(cc(Nc3n(ncc3)C)cc2)C(=O)CC12CCN(CC2)C(=O)N[C@H]1C[C@@H]1c1ccccc1	10	3.39	5	1.61	7.06791	35	0.20194
CHEMBL443542	S(=O)(=O)(N(C)c1n(ncc1)-c1ccccc1)c1ccc(N)cc1	100	2.39	4	1.61	5.65433	23	0.24584
CHEMBL1671917	s1ccnc1NC(=O)c1ccc(NC(=O)CCCC)cc1	40	2.79	4.39794	1.60794	6.21685	21	0.29604
CHEMBL101180	O\N=C\Nc1ccc(cc1)C(C)C	30	2.92	4.52288	1.60288	6.39346	13	0.491804
CHEMBL1784168	Fc1cc(cc(-c2ccc(cc2)C(=O)NCC2OCCC2)c1C)C(=O)NC1CC1	12.5892	3.3	4.9	1.6	6.92655	29	0.238847
CHEMBL1208960	s1c(C(=O)N)c(O[C@@H](C)c2ccccc2C(F)(F)F)cc1-n1c2c(nc1)cc(cc2)-c1cc(ncc1)N1CCOCC1	0.1	5.4	7	1.6	9.89507	42	0.235597
CHEMBL808	Clc1cc(Cl)ccc1C(OCc1ccc(Cl)cc1)Cn1ccnc1	0.2	5.1	6.69897	1.59897	9.46954	24	0.394564
CHEMBL1940274	O(c1ccc(cc1)CC(=O)Nc1cn(nc1)C(C)C)c1ncnc2c1cc(OC)c(OC)c2	8	3.51	5.09691	1.58691	7.2049	33	0.21833
CHEMBL3115191	s1cncc1COC(=O)N[C@@H](Cc1ccccc1)CC[C@@H](NC(=O)[C@@H](NC(=O)N(Cc1nc(sc1)C(C)C)C)Cc1nc[nH]c1)Cc1ccccc1	4.7	3.75	5.3279	1.5779	7.53142	52	0.144835
CHEMBL1951032	S(=O)(=O)(C)c1nc(C)c(Nc2ncnc(OC3CCN(CC3)C(OC(C)C)=O)c2OC)cc1	8	3.52	5.09691	1.57691	7.2049	33	0.21833
CHEMBL462513	s1cc(cc1-c1ccc(O)cc1)-c1cc(O)ccc1	0.8	4.52	6.09691	1.57691	8.61848	19	0.453604
CHEMBL2407899	O=C/1Nc2c(cccc2)\C\1=C/c1cc2[nH]nc(c2cc1)\C=C\c1ccc(nc1)N1CCN(CC1)C	0.9	4.47	6.04576	1.57576	8.54617	35	0.244176
CHEMBL179618	s1cccc1-c1cccnc1	99.2	2.43	4.00349	1.57349	5.65926	11	0.514478
CHEMBL2436981	[nH]1cc(c2cc(cnc12)-c1ccc(nc1)N)-c1cc2c([nH]cc2)cc1	13.7	3.29	4.86328	1.57328	6.87464	25	0.274986
CHEMBL483337	Oc1cc2C=Cc3n(ncc3CCC(=O)NC=3CCCCC=3C(O)=O)-c2cc1	19	3.15	4.72125	1.57125	6.67387	28	0.238352
CHEMBL38958	Clc1ccc(cc1)Cn1c2c(cc(OCc3ncccc3)cc2)c(SC(C)(C)C)c1CC(C(O)=O)(C)C	0.001	7.43	9	1.57	12.7222	37	0.343844
CHEMBL1232887	O=C(NC1CC1)c1cc(-c2ncc(cc2)C(=O)NCC2CC2)c(cc1)C	39.8107	2.83	4.4	1.57	6.21976	26	0.239221
CHEMBL497419	O(C)c1ccccc1CNC1=CC(N2C=CC=CC2=O)=Cn2c1nc(C)c2C	5.6	3.69	5.25181	1.56181	7.42386	28	0.265138
CHEMBL3115185	s1cncc1COC(=O)N[C@@H](Cc1ccccc1)CC[C@@H](NC(=O)[C@@H](NC(=O)N(Cc1nc(sc1)C(C)C)C)Cc1ncn(c1)C)Cc1ccccc1	4.7	3.77	5.3279	1.5579	7.53142	53	0.142102
CHEMBL1083622	Fc1ccc(cc1)C(CCNC(=O)N1CCC(Oc2nccnc2)CC1)c1ccc(F)cc1	2.9	3.98	5.5376	1.5576	7.82785	33	0.237208
CHEMBL472	Clc1cc(C(=O)NCCc2ccc(S(=O)(=O)NC(=O)NC3CCCCC3)cc2)c(OC)cc1	1.602	4.24	5.79534	1.55534	8.19218	33	0.248248
CHEMBL1585484	Clc1cc(ccc1)CSc1[nH]c2c(n1)cc(S(=O)(=O)N1CCOCC1)cc2	1.5	4.27	5.82391	1.55391	8.23257	27	0.30491
CHEMBL480764	O1CCC(CC1)C(NC(=O)c1cc2c(cc1NC(=O)Nc1c(cc(cc1C)C)C)cccc2)C(O)=O	2.4	4.08	5.61979	1.53979	7.94403	36	0.220667
CHEMBL517440	Clc1ccccc1C(=O)N(CC(O)(CNC(=O)c1cnn(c1N)-c1ccc(F)cc1)C(F)(F)F)CC	4	3.87	5.39794	1.52794	7.63043	36	0.211956
CHEMBL1760205	Clc1ccc(cc1)-c1nn(C)c(c1)C(=O)N1CCN(CC1)c1ccccc1OC	3	4	5.52288	1.52288	7.80704	29	0.269208
CHEMBL296580	S(Cc1ncccc1)c1[nH]c2c(n1)cccc2	50	2.78	4.30103	1.52103	6.07986	17	0.357639
CHEMBL431770	O(C)c1cc(ccc1OC)\C=C\c1nc2N(CC)C(=O)N(CC)C(=O)c2n1C	13	3.37	4.88606	1.51606	6.90684	28	0.246673
CHEMBL3114719	s1cncc1COC(=O)N[C@@H](CC[C@@H](NC(=O)[C@@H](NC(=O)N(Cc1nc(sc1)C(C)C)C)C(C)C)CC)CC	13.4	3.36	4.8729	1.5129	6.88823	39	0.176621
CHEMBL100899	O\N=C\Nc1ccc(cc1)C(CC)C	11	3.45	4.95861	1.50861	7.0094	14	0.500671
CHEMBL1898239	S(Cc1onc(n1)-c1ccc(OC)cc1)c1nnc(n1-c1ccc(OC)cc1)C	21	3.17	4.67778	1.50778	6.61242	29	0.228015
CHEMBL400404	o1cnc(C(=O)N[C@@H](Cc2ccccc2)C(O)=O)c1Cc1ccc(cc1)-c1cc(NC(=O)C)ccc1	5.1	3.79	5.29243	1.50243	7.48128	36	0.207813
CHEMBL1272135	Clc1cccc(F)c1CN1C=CC=C(NC(=O)Nc2cc(OC)ccc2)C1=O	3.7	3.93	5.4318	1.5018	7.67829	28	0.274225
CHEMBL1947144	O1[C@@](C)(c2cc(ccc2)CN2c3c(N(c4noc5c4ccc(OC)c5)C2=O)cccc3)C(=O)NC1=O	2	4.2	5.69897	1.49897	8.05596	36	0.223777
CHEMBL3127906	Clc1cc(C(F)(F)F)c(OCCN2CCN3C(=CC=C(n4cc(nc4)C)C3=O)C2=O)cc1	15.4	3.32	4.81248	1.49248	6.80283	32	0.212588
CHEMBL589136	Clc1cc(Cl)ccc1CNC(=O)N1CCC(Oc2ncccn2)CC1	20	3.21	4.69897	1.48897	6.64238	25	0.265695
CHEMBL461012	Clc1cccc(Cl)c1C(=O)N(CC(O)(CNC(=O)c1cnn(c1N)-c1ccc(F)cc1)C(F)(F)F)CC	0.8	4.61	6.09691	1.48691	8.61848	37	0.232932
CHEMBL2386075	s1cccc1C(=O)N1CCc2n(c3c(cc(F)cc3)c2C1)CC(O)=O	43	2.88	4.36653	1.48653	6.17245	25	0.246898
CHEMBL584422	Clc1cc(N(Cc2ccccc2F)[C@H]2CCN(S(=O)(=O)C)C2)ccc1C#N	1.7	4.29	5.76955	1.47955	8.15573	27	0.302064
CHEMBL2070156	S(=O)(=O)(CC)c1cc2nc([nH]c2cc1)-c1cc(cnc1)-c1ccccc1	9.8	3.53	5.00877	1.47877	7.08031	26	0.27232
CHEMBL2158221	FC(F)(F)C(O)=O.O=C(Nc1ccc(cc1C=1CCCCC=1)C1CCNCC1)c1[nH]cc(n1)C#N	4.1	3.91	5.38722	1.47722	7.61527	35	0.217579
CHEMBL103313	O\N=C\Nc1ccc(cc1)CCCC	8.8	3.58	5.05552	1.47552	7.14639	14	0.510456
CHEMBL225464	Clc1cc(Nc2nc(C(F)(F)F)c(cn2)C(=O)NCC2CCOCC2)c(F)cc1	37	2.96	4.4318	1.4718	6.26471	29	0.216024
CHEMBL561132	S(=O)(=O)(N(C)[C@@H]1CCc2n(C1)c1c(cccc1)c2CC(O)=O)c1ccc(F)cc1	5	3.83	5.30103	1.47103	7.49344	29	0.258394
CHEMBL799	O(CCCCc1nnnn1C1CCCCC1)c1cc2CCC(=O)Nc2cc1	10	3.53	5	1.47	7.06791	27	0.261774
CHEMBL591072	Clc1cc(N(Cc2ccccc2)[C@H]2CCN(S(=O)(=O)C)C2)ccc1C#N	2.4	4.15	5.61979	1.46979	7.94403	26	0.30554
CHEMBL2419487	S(=O)(=O)(NC(=O)C1CN(C1)c1nc(C)c(cc1C#N)C(OCC)=O)Cc1ccc(cc1)C	20	3.23	4.69897	1.46897	6.64238	32	0.207574
CHEMBL1867804	S(Cc1onc(n1)-c1cc(OC)c(OC)cc1)c1nnc(n1-c1ccc(OC)cc1)C	45	2.88	4.34679	1.46679	6.14454	31	0.198211
CHEMBL595705	Clc1cc(S(=O)(=O)N2CCC3(CC3NS(=O)(=O)C(F)(F)F)CC2)c(S(=O)(=O)c2ccc(OC)cc2)cc1	1	4.54	6	1.46	8.48149	37	0.229229
CHEMBL1173087	Clc1cc(ccc1Cl)[C@@]12C[C@]1(CNCC2)C(OC)CC=C	3	4.07	5.52288	1.45288	7.80704	21	0.371764
CHEMBL591092	Clc1cc(N(Cc2ccccc2C(F)(F)F)[C@H]2CCN(S(=O)(=O)C)C2)ccc1C#N	0.33	5.03	6.48149	1.45149	9.16211	30	0.305404
CHEMBL2392704	FC(F)(F)c1ccccc1CNC(=O)C1CCN(CC1)c1nc(NC)cc(c1)C	11	3.51	4.95861	1.44861	7.0094	29	0.241703
CHEMBL1649661	FC(F)(F)c1nn(c2c1CCCC2)-c1ccc(cc1)C(=O)C	4	3.95	5.39794	1.44794	7.63043	22	0.346838
CHEMBL231620	Clc1cc(ccc1)C(O)CNC=1C=CNC(=O)C=1c1[nH]c2c(n1)c(cc(c2)-c1[nH]c(cn1)C)C	7.8	3.66	5.10791	1.44791	7.22044	34	0.212366
CHEMBL521889	O=C1NCCN1C=1C=C(NCc2c(cccc2C)C)c2n(C=1)c(C)c(n2)C	5.8	3.79	5.23657	1.44657	7.40232	27	0.27416
CHEMBL1917443	S(c1c2cc(ccc2n(CC(O)=O)c1C)C)c1ccc(S(=O)(=O)C)cc1	5.2	3.84	5.284	1.444	7.46936	26	0.287283
CHEMBL238146	O=C(N)C=1C=C(NCc2c(cccc2C)CC)c2n(C=1)c(C)c(n2)C	3.6	4	5.4437	1.4437	7.69511	25	0.307804
CHEMBL2332068	O(C)c1cc(ccc1)CN(CCN(C)C)C(=O)Nc1ccc(cc1)-c1cn[nH]c1	30	3.08	4.52288	1.44288	6.39346	29	0.220464
CHEMBL2070138	S(=O)(=O)(CCC)c1cc2nc([nH]c2cc1)-c1ccccc1	9.5	3.58	5.02228	1.44228	7.0994	21	0.338066
CHEMBL2018914	S(CCCC(O)=O)c1[nH]c2c(n1)cc(OC)cc2	50	2.86	4.30103	1.44103	6.07986	18	0.33777
CHEMBL503699	O=C(Nc1ccc(nc1)C)c1cc(NC(=O)c2cc(ccc2)C(C#N)(C)C)ccc1C	9.8	3.57	5.00877	1.43877	7.08031	31	0.228397
CHEMBL565390	o1c2c(cc1C)cc(N\C(=N\C(=O)c1ccc(nc1)C)\N[C@H]1CCCCN(CC(=O)N3CCCC3)C1=O)cc2	9	3.61	5.04576	1.43576	7.13259	39	0.182887
CHEMBL227899	Clc1cc(Nc2nc(C(F)(F)F)c(cn2)C(=O)NCC2CCC2)ccc1	3	4.1	5.52288	1.42288	7.80704	26	0.300271
CHEMBL3298322	Fc1ccc(Oc2nccc3c2cc(OC)c(OC)c3)cc1	1.9	4.3	5.72125	1.42125	8.08745	22	0.367611
CHEMBL496386	O=C1N(C=C(C=C1)C(=O)N)C=1C=C(NCc2c(cccc2C)C)c2n(C=1)c(C)c(n2)C	19	3.3	4.72125	1.42125	6.67387	31	0.215286
CHEMBL219861	s1c2N(CC(C)C)C(=O)N(C)C(=O)c2c(C(=O)N2OC[C@@H](O)C2)c1Cc1c2c(ncc1)cccc2	13	3.47	4.88606	1.41606	6.90684	35	0.197338
CHEMBL1631095	FC(F)(F)c1ccc(cc1-c1cc(-n2nc(cc2C(=O)N)C(=O)N)ccc1)C(F)(F)F	20.3	3.28	4.6925	1.4125	6.63324	31	0.213975
CHEMBL521724	O=C1N(C=CC=C1)C=1C=C(N[C@H]2CCc3c2cccc3)c2n(C=1)c(C)c(n2)C	2.5	4.19	5.60206	1.41206	7.91897	28	0.28282
CHEMBL1800911	O=C1Nc2c(ccc(c2)-c2cc(ccc2C)C(=O)NC2CC2)C12CCCC2	10	3.59	5	1.41	7.06791	27	0.261774
CHEMBL1649672	FC(F)(F)c1nn(c2c1CCCC2)-c1ccc(cc1)CNC(=O)CC	8	3.69	5.09691	1.40691	7.2049	25	0.288196
CHEMBL179669	s1ccc(C)c1-c1cccnc1	93.1	2.63	4.03105	1.40105	5.69822	12	0.474851
CHEMBL1760206	Clc1ccc(cc1)-c1n(nc(c1)C(=O)N1CCN(CC1)c1ccccc1OC)C	4	4	5.39794	1.39794	7.63043	29	0.263118
CHEMBL408444	Fc1c2cc([nH]c2ccc1OC1=NC=Nn2c1c(C)c(OC[C@H](OC(=O)[C@@H](N)C)C)c2)C	9.7	3.62	5.01323	1.39323	7.08661	32	0.221456
CHEMBL482480	Clc1cc(O)ccc1-c1scc(n1)CCC(=O)Nc1ccccc1C(O)=O	1.2	4.53	5.92082	1.39082	8.36956	27	0.309984
CHEMBL2079587	O[C@]1(CC[C@H]2[C@H]3[C@H](CC[C@]12C)[C@@]1([C@H](Cc2n[nH]cc2C1)CC3)C)C	1.1276	4.56	5.94785	1.38784	8.40776	24	0.350323
CHEMBL332958	S(=O)(=O)(N(C)c1n(ncc1)-c1ccccc1)c1ccc(cc1)C	10	3.62	5	1.38	7.06791	23	0.3073
CHEMBL595706	S(=O)(=O)(c1ccccc1F)c1ccc(cc1S(=O)(=O)N1CCC2(CC2NS(=O)(=O)C(F)(F)F)CC1)C(F)(F)F	1	4.62	6	1.38	8.48149	39	0.217474
CHEMBL2022739	Fc1cc(NC(=O)c2ccccc2F)ccc1-c1oc(nn1)NCCCCN1CCOCC1	51	2.93	4.29243	1.36243	6.0677	33	0.18387
CHEMBL1080046	S(=O)(=O)(Nc1cc2CCN(CCc2cc1)Cc1n[nH]cc1)c1ccc(cc1)CCCC	0.6	4.86	6.22185	1.36185	8.79509	31	0.283713
CHEMBL529213	S(=O)(=O)(N1CCN(CC1)C(=O)[C@@H]1C[C@H]1c1ccc(cc1)C(F)(F)F)c1cc(cc(c1)C(F)(F)F)-c1[nH]cnn1	6	3.86	5.22185	1.36185	7.38151	39	0.189269
CHEMBL1643783	S(=O)(=O)(N(C)[C@@H]1CCc2n(c3c(cccc3F)c2CC(O)=O)C1)c1ccc(F)cc1	4.2	4.02	5.37675	1.35675	7.60047	30	0.253349
CHEMBL225412	Clc1cc(Nc2nc(C(F)(F)F)c(cn2)C(=O)NCC2CCOCC2)cc(Cl)c1	13	3.53	4.88606	1.35606	6.90684	29	0.238167
CHEMBL482768	Oc1cc2CCc3n(ncc3CCC(=O)Nc3ccccc3C(O)=O)-c2cc1	18	3.4	4.74473	1.34473	6.70706	28	0.239538
CHEMBL485967	s1c(ccc1C(=O)NC(C)c1c2c(ccc1)cccc2)C(=O)C(F)(F)F	1.4	4.51	5.85387	1.34387	8.27492	26	0.318266
CHEMBL1784170	Fc1cc(cc(-c2ccc(cc2)C(=O)NCCOC)c1C)C(=O)NC1CC1	63.0957	2.86	4.2	1.34	5.93704	27	0.21989
CHEMBL567911	Clc1cc(Nc2ncc(c3c2[nH]cc3C)C(=O)N2CCOCC2)ccc1	4.7	3.99	5.3279	1.3379	7.53142	26	0.28967
CHEMBL1762808	Clc1c2n(cc(c2ccc1)-c1scc(n1)CN(C(C)C)CCO)CC1CCOCC1	2.8	4.22	5.55284	1.33284	7.84939	30	0.261646
CHEMBL271621	Clc1cc(Cl)ccc1CC(C(OCC)=O)c1oncc1	11	3.63	4.95861	1.32861	7.0094	20	0.35047
CHEMBL3098241	S(CCC)c1nc(N[C@@H]2C[C@H]2c2cc(F)c(F)cc2)c2nnn(c2n1)[C@H]1[C@H](O)[C@H](O)[C@@H](O)[C@H]1F	8.82	3.73	5.05453	1.32453	7.14499	34	0.210147
CHEMBL189942	Fc1nc2N(c3ncc(cc3C(=O)N(c2cc1)C)CCOc1ccc(cc1C)C(O)=O)CC	6	3.9	5.22185	1.32185	7.38151	33	0.223682
CHEMBL253083	S(=O)(=O)(C(C)(C)c1cc(c2ncccc2c1)-c1cc(ccc1)-c1ccc(cc1)C1CC1C(O)=O)C	1.7	4.45	5.76955	1.31955	8.15573	35	0.233021
CHEMBL2347418	FC(F)Oc1cc2c(n(nc2-c2nc3c([nH]cc3C(=O)NC(C)(C)C)nc2)CCCN2CCOCC2)cc1	4	4.08	5.39794	1.31794	7.63043	38	0.200801
CHEMBL121503	S(=O)(=O)(N(CCCO)c1n(ncc1)-c1ccccc1)c1ccc(cc1)-c1cc(N)ccc1	12	3.61	4.92082	1.31082	6.95598	32	0.217374
CHEMBL3260742	Clc1ccc(cc1)C=1C=2N(N(Cc3ccc(nc3)C(F)(F)F)C(=O)C=1c1ccncc1)C(=O)N(N=2)CC	4.9	4	5.3098	1.3098	7.50584	37	0.202861
CHEMBL497829	Clc1cc(Cl)ccc1CC(=O)N1CCC2(Oc3c(cc(S(=O)(=O)C)cc3)CC2)CC1	10	3.7	5	1.3	7.06791	30	0.235597
CHEMBL482481	Clc1cc(O)ccc1-c1scc(n1)C(CC(=O)NC=1CCCCC=1C(O)=O)C	5.1	4	5.29243	1.29243	7.48128	28	0.267189
CHEMBL528996	Clc1cc(-n2nc(cc2)C)ccc1C(=O)N1CCC(F)(F)/C(/c2c1cccc2)=C/C(=O)NCc1ncccc1	9.1	3.75	5.04096	1.29096	7.12581	39	0.182713
CHEMBL313383	FC(F)(F)CNC(=O)[C@H]1N(CCN(C1)Cc1oc(cc1)-c1ccncc1)C[C@@H](O)C[C@@H](Cc1ccccc1)C(=O)NC1C2C(OC[C@H]1O)C=CC=C2	5.5	3.97	5.25964	1.28964	7.43493	52	0.142979
CHEMBL151038	o1ncc(C)c1-c1ccc(OCCCC)cc1	8.18	3.8	5.08725	1.28725	7.19124	17	0.423014
CHEMBL1813474	Clc1cc(ccc1Cl)[C@@]12[C@@H](CCC1)CNC2	4.01	4.11	5.39686	1.28686	7.62889	16	0.476806
CHEMBL151449	o1nccc1-c1cc(OCCCC)ccc1	7.74	3.83	5.11126	1.28126	7.22518	16	0.451574
CHEMBL567904	o1c2c(cc1C)cc(\N=C(/N[C@H]1CCCCN(CC(=O)N3CCCC3)C1=O)\NC(=O)c1cccnc1)cc2	10	3.72	5	1.28	7.06791	38	0.185998
CHEMBL2017290	o1nc(C)c(-c2cc3ncc4NC(=O)N(c4c3cc2OC)[C@@H](CC)c2ccccc2)c1C	2.4	4.34	5.61979	1.27979	7.94403	32	0.248251
CHEMBL2048183	S(Cc1cc(ccc1OC)C(=O)C)c1nc2c(n1CC(O)=O)cccc2	24	3.34	4.61979	1.27979	6.53045	26	0.251171
CHEMBL596579	Clc1cc(S(=O)(=O)c2ccccc2F)c(S(=O)(=O)N2CCC3(CC3NS(=O)(=O)C(F)(F)F)CC2)cc1	2	4.42	5.69897	1.27897	8.05596	36	0.223777
CHEMBL192530	O(CCc1cc2c(nc1)N(c1ncccc1N(C)C2=O)CC)c1ccc(cc1C)C(O)=O	10	3.73	5	1.27	7.06791	32	0.220872
CHEMBL564845	S(=O)(=O)(N(C)[C@@H]1CCc2c(C1)c1n(C=CC=C1)c2CC(O)=O)c1ccc(F)cc1	10	3.73	5	1.27	7.06791	29	0.243721
CHEMBL1241825	O1c2c(-n3c(C1)c(nc3)C#N)cccc2CCN1CCN(CC1)c1c2c(nc(cc2)C)ccc1	2	4.43	5.69897	1.26897	8.05596	34	0.23694
CHEMBL151037	O(CCCC)c1ccc(cc1)-c1n(ncc1)C	6.48	3.92	5.18843	1.26842	7.33426	17	0.431427
CHEMBL150681	o1nccc1-c1ccc(OCCCC)cc1	8	3.83	5.09691	1.26691	7.2049	16	0.450306
CHEMBL2070155	S(=O)(=O)(CC)c1cc2nc([nH]c2cc1)-c1nccc(c1)-c1ccccc1	10	3.74	5	1.26	7.06791	26	0.271843
CHEMBL231609	Clc1cc(ccc1)C(O)CNC=1C=CNC(=O)C=1c1[nH]c2c(n1)c(cc(c2)C(=O)NC1CCCC1)C	3.5	4.2	5.45593	1.25593	7.7124	36	0.214233
CHEMBL392642	S(C)c1ccccc1CNc1nc(NCC2CCC(CC2)CN)c([N+](=O)[O-])cn1	1.4	4.6	5.85387	1.25387	8.27492	29	0.285342
CHEMBL240566	O1c2c(N(CCCOC)C(=O)C1(CC)C)cc(cc2)-c1c(nc(nc1N)N)CC	30	3.28	4.52288	1.24288	6.39346	29	0.220464
CHEMBL592895	S(=O)(=O)(c1ccccc1S(=O)(=O)N1CCC2(CC2NS(=O)(=O)C(F)(F)F)CC1)c1ncccc1	30	3.28	4.52288	1.24288	6.39346	34	0.188043
CHEMBL2347417	FC(F)Oc1cc2c(n(nc2-c2nc3c([nH]cc3C(=O)NC(C)(C)C)nc2)CCCN2CC(C2)C#N)cc1	5	4.06	5.30103	1.24103	7.49344	38	0.197196
CHEMBL333108	S(=O)(=O)(Nc1n(ncc1)-c1ccccc1)c1ccc(cc1)-c1cc(N)ccc1	12	3.68	4.92082	1.24082	6.95598	28	0.248428
CHEMBL246970	Clc1ccccc1CNc1nc(NCC2CCC(CC2)CN)c([N+](=O)[O-])cn1	1	4.76	6	1.24	8.48149	28	0.30291
CHEMBL2171124	FC(F)(F)c1cc(ccc1)CC(=O)N1CCc2cc(ccc12)-c1c2c(ncnc2N)n(c1)C	4.5	4.11	5.34679	1.23679	7.55812	33	0.229034
CHEMBL496624	n12c(nc(C)c1C)C(NCc1c(cccc1C)CC)=CC(=C2)c1ncnn1C	3.2	4.26	5.49485	1.23485	7.76742	28	0.277408
CHEMBL514670	Clc1cc(NC(=O)c2cc(NC(=O)c3cc(ccc3)C(F)(F)F)ccc2C)cnc1N	1.8	4.51	5.74473	1.23473	8.12064	31	0.261956
CHEMBL313623	FC(F)(F)CNC(=O)[C@H]1N(CCN(C1)C(C)(C)c1oc(cn1)-c1cccnc1)C[C@@H](O)C[C@@H](Cc1ccccc1)C(=O)NC1C2C(OC[C@H]1O)C=CC=C2	33	3.25	4.48149	1.23149	6.33495	54	0.117314
CHEMBL1201139	O=C1CC[C@@]2([C@@H]3[C@H]([C@@H]4CC[C@](OC(=O)C)(C(=O)C)[C@]4(CC3)C)C=C(C2=C1)C)C	10	3.77	5	1.23	7.06791	28	0.252425
CHEMBL425819	Clc1cc(ccc1)C(O)CNC=1C=CNC(=O)C=1c1[nH]c2c(n1)c(cc(c2)C(NC)=N)C	76	2.89	4.11919	1.22919	5.82281	32	0.181963
CHEMBL2325485	Brc1ccc(cc1)C(=O)N[C@@H](CN1CCC2(N(CNC2=O)c2cc(ccc2)C)CC1)C	13.3	3.65	4.87615	1.22615	6.89283	31	0.222349
CHEMBL453246	n12c(nc(C)c1C)C(NCc1c(cccc1C)C)=CC(n1nccc1)=C2	0.86	4.84	6.0655	1.2255	8.57408	26	0.329772
CHEMBL589135	Clc1cc(Cl)ccc1CNC(=O)N1CCC(Oc2ccccc2)CC1	1.4	4.63	5.85387	1.22387	8.27492	25	0.330997
CHEMBL47529	O(Cc1ccccc1)C=1c2n(C=CC=1)c(CC#N)c(n2)C	54	3.05	4.26761	1.21761	6.03261	21	0.287267
CHEMBL1082725	Clc1cc2c(NC(=O)[C@@]23N[C@H](Cc2c3[nH]c3cc(F)c(F)cc23)C)cc1	7.35	3.92	5.13371	1.21371	7.25692	26	0.279112
CHEMBL239074	Clc1ccc(cc1)C1(Oc2c(N(CCNC(=O)C)C1=O)cc(cc2)-c1c(nc(nc1N)N)CC)C	12	3.71	4.92082	1.21082	6.95598	35	0.198742
CHEMBL1169660	Clc1cc(S(=O)(=O)Nc2cc(Cl)cnc2Oc2ccccc2C(=O)NCCO)ccc1Cl	5.01187	4.09	5.3	1.21	7.49198	32	0.234124
CHEMBL483160	Oc1cc2CCc3c(n(nc3CCC(=O)Nc3ccccc3C(O)=O)C)-c2cc1	17	3.56	4.76955	1.20955	6.74215	29	0.232488
CHEMBL2043004	Oc1ncnc(N2C3(CCN(CC3)Cc3ncccc3C)C(=O)N(c3ccc(cc3)-c3ccccc3)C2=O)c1	65	2.98	4.18709	1.20709	5.91879	39	0.151764
CHEMBL1928092	s1c(-c2cc(OC)c(OC)cc2)c(C)c(C#N)c1\N=C\c1ccc(N(CCC#N)C)cc1	1.2	4.72	5.92082	1.20082	8.36956	32	0.261549
CHEMBL602745	Clc1cc(N(Cc2ccccc2Cl)[C@H]2CCN(S(=O)(=O)C)C2)ccc1C#N	0.87	4.86	6.06048	1.20048	8.56698	27	0.317296
CHEMBL476572	S(=O)(=O)(N)c1cc(Nc2nc(N(C)c3cc4nn(Cc5ccccc5)c(c4cc3)C)ccn2)ccc1	0.5	5.11	6.30103	1.19103	8.90702	36	0.247417
CHEMBL1208962	Clc1ccccc1[C@@H](Oc1cc(sc1C(=O)N)-n1c2c(nc1)cc(cc2)-c1cc(ncc1)NCCS(=O)(=O)C)C	1.7	4.58	5.76955	1.18955	8.15573	40	0.203893
CHEMBL151207	O(CCCC)c1ccc(-n2cc(nc2)C)cc1	6.88	3.98	5.16241	1.18241	7.29749	17	0.429264
CHEMBL422858	o1nc(cc1-c1ccc(OCCCC)cc1)C	5.22	4.1	5.28233	1.18233	7.467	17	0.439235
CHEMBL590611	Clc1cc(N(Cc2ccccc2C(F)(F)F)[C@H]2CCN(C2)C(=O)C)ccc1C#N	1.8	4.57	5.74473	1.17473	8.12064	29	0.280022
CHEMBL1760338	Clc1ccc(cc1)-c1n[nH]c(c1)C(=O)N1CCN(CC1)c1ccccc1OC	3	4.35	5.52288	1.17288	7.80704	28	0.278823
CHEMBL1909048	Clc1ccccc1C(=O)N1CCC(CC1)Cc1ccccc1	2	4.53	5.69897	1.16897	8.05596	22	0.36618
CHEMBL392463	Fc1cc(C)c(cc1)[C@H]1CN(C[C@@H]1c1onc(n1)C(C)(C)c1cc(cc(c1)C(F)(F)F)C(F)(F)F)C(=O)C1CCN(CC1)C(=O)C	47	3.16	4.3279	1.1679	6.11784	46	0.132997
CHEMBL2347337	O(C(=O)N[C@@H](C(C)C)C(=O)N1CCC[C@H]1c1[nH]c(cn1)-c1ccc(cc1)-c1ccc(cc1)CO)C	31.2	3.34	4.50585	1.16585	6.36938	35	0.181982
CHEMBL225413	Clc1cccc(Nc2nc(C(F)(F)F)c(cn2)C(=O)NCC2CCOCC2)c1F	75	2.96	4.12494	1.16494	5.83094	29	0.201067
CHEMBL462624	Clc1c(Oc2ccc(NC(=O)C3=CC=CN(C3=O)c3ccc(F)cc3)cc2F)ccnc1N	7	3.99	5.1549	1.1649	7.28687	33	0.220814
CHEMBL475807	O(CC)C[C@H](NC(=O)c1cc2c(cc1NC(=O)Nc1c(cc(cc1C)C)C)cccc2)C(O)=O	3.3	4.32	5.48149	1.16149	7.74853	34	0.227898
CHEMBL592017	Brc1ccccc1CN([C@H]1CCN(S(=O)(=O)C)C1)c1cc(Cl)c(cc1)C#N	0.69	5.01	6.16115	1.15115	8.70929	27	0.322566
CHEMBL502908	Oc1cc(ccc1)-c1ccc(cc1)-c1cc(O)ccc1	1.9	4.58	5.72125	1.14125	8.08745	20	0.404372
CHEMBL2048204	S(Cc1cc(ccc1OC)C(=O)N1CCc2c1cccc2)c1nc2cc(F)ccc2n1CC(O)=O	2	4.56	5.69897	1.13897	8.05596	35	0.23017
CHEMBL434317	O(CCCC)c1ccc(cc1)-c1[nH]ncc1C	8.7	3.93	5.06048	1.13048	7.1534	17	0.420788
CHEMBL485184	Oc1cc2c(-c3c(N(C)C2=O)cc(cc3)CCC(=O)Nc2ccccc2C(O)=O)cc1	4.7	4.2	5.3279	1.1279	7.53142	31	0.242949
CHEMBL483352	Oc1cc2c(c3n[nH]c(c3cc2)CCC(=O)Nc2ccccc2C(O)=O)cc1	9.2	3.91	5.03621	1.12621	7.1191	28	0.254253
CHEMBL330871	S(=O)(=O)(N(CC)c1n(ncc1)-c1ccccc1)c1ccc(N)cc1	90	2.92	4.04576	1.12576	5.71901	24	0.238292
CHEMBL2019025	S(Cc1ncccc1)c1[nH]c2c(n1)cc(OC(F)F)cc2	22.3	3.53	4.6517	1.1217	6.57555	21	0.313121
CHEMBL397600	Fc1cc2c(nc(-c3ccc(cc3)-c3ccccc3OCC)c(C#N)c2N[C@@H](C(O)=O)C)cc1	0.066	6.06	7.18046	1.12046	10.1502	34	0.298534
CHEMBL3115180	s1cncc1COC(=O)N[C@@H](Cc1ccccc1)CC[C@@H](NC(=O)[C@H](NC(=O)N(Cc1nc(sc1)C(C)C)C)CCN1CCOCC1)Cc1ccccc1	8	3.98	5.09691	1.11691	7.2049	54	0.133424
CHEMBL273921	Fc1cc2nc(O)n(c2cc1)C1CCN(CC1)CCN1CCCc2c(cccc2)C1=O	35	3.34	4.45593	1.11593	6.29882	31	0.203188
CHEMBL380192	S(CCCO)c1n(cc2c1C(=O)N(N=C2CC(C)C)C)Cc1c2c(ccc1)cccc2	2.6	4.47	5.58503	1.11503	7.89489	31	0.254674
CHEMBL244239	O(C)c1cc(ccc1OC)CCN(CCNC(=O)c1ccccc1NC(=O)c1cc2c(nc1)cccc2)C	2.08	4.57	5.68194	1.11194	8.03188	38	0.211365
CHEMBL1784172	Fc1cc(cc(-c2ncc(cc2)C(=O)NCC2CC2)c1C)C(=O)NC1CC1	63.0957	3.09	4.2	1.11	5.93704	27	0.21989
CHEMBL497418	O=C1N(C=CC=C1)C=1C=C(NCc2ccccc2)c2n(C=1)c(C)c(n2)C	13	3.78	4.88606	1.10606	6.90684	26	0.265648
CHEMBL558448	Clc1ccc(cc1NC1=CC(=O)N(c2n(ncc12)-c1ccc(F)cc1F)C)C(=O)NC1CC1	8.4	3.97	5.07572	1.10572	7.17494	33	0.217423
CHEMBL1649669	Fc1cc(-n2nc(c3CCCCc23)C(F)(F)F)ccc1CC(=O)N1CCCC1	7	4.05	5.1549	1.1049	7.28687	28	0.260245
CHEMBL1209017	Clc1ccccc1[C@@H](Oc1cc(sc1C(=O)N)-n1c2c(nc1)cc(cc2)-c1cn(nc1)CCCN(C)C)C	0.4	5.3	6.39794	1.09794	9.04401	38	0.238
CHEMBL500394	O(C)c1cc2c(cc(cc2)-c2c3c(cccc3)cnc2)cc1	1.27	4.8	5.8962	1.0962	8.33475	22	0.378852
CHEMBL551991	o1c2c(cc1C)cc(\N=C(/N[C@H]1CCCCN(CC(=O)N3CCCC3)C1=O)\NC#N)cc2	29.2	3.44	4.53462	1.09462	6.41005	32	0.200314
CHEMBL1766005	O(C(=O)C(C(n1ccnc1)c1ccc(Nc2cc3c(cc2)cccc3)cc1)(C)C)C	1.5	4.73	5.82391	1.09391	8.23257	30	0.274419
CHEMBL1643780	S(=O)(=O)(N(C)[C@@H]1CCc2n(c3c(ccc(F)c3F)c2CC(O)=O)C1)c1ccc(F)cc1	6.4	4.1	5.19382	1.09382	7.34189	31	0.236835
CHEMBL314062	FC(F)(F)CNC(=O)[C@H]1N(CCN(C1)C(C)(C)c1oc(cn1)-c1ncccc1)C[C@@H](O)C[C@@H](Cc1ccccc1)C(=O)NC1C2C(OC[C@H]1O)C=CC=C2	28	3.46	4.55284	1.09284	6.43581	54	0.119182
CHEMBL1643514	Clc1cc(N2CC[C@@H](N(C)C)c3c2cccc3)ccc1Cl	0.25	5.51	6.60206	1.09206	9.33255	21	0.444407
CHEMBL253641	S1(=O)(=O)N(CCCC1)c1cc(NCC)cc(C(=O)N[C@@H]([C@H](O)CNCc2cc(ccc2)C(F)(F)F)Cc2ccccc2)c1F	9	3.96	5.04576	1.08576	7.13259	44	0.162104
CHEMBL236163	Oc1ccc(-n2ncc(CCC(=O)Nc3ccccc3C(O)=O)c2C)cc1	15	3.74	4.82391	1.08391	6.81899	27	0.252555
CHEMBL220660	O(Cc1ccccc1)C(=O)N1CCC(CC1)CNc1nccnc1	12	3.84	4.92082	1.08082	6.95598	24	0.289832
CHEMBL447822	n12c(nc(C)c1C)C(NCc1c(cccc1C)C)=CC(=C2)c1ncccc1	0.63	5.12	6.20066	1.08066	8.76514	27	0.324635
CHEMBL2178223	Clc1ccc(NC(=O)[C@H]2CN(C[C@@H]2c2ccc(cc2)\C=C\C(=O)Nc2ccccc2N)CC(O)(C)C)cc1	4	4.32	5.39794	1.07794	7.63043	38	0.200801
CHEMBL219098	s1c2N(CC(C)C)C(=O)N(C)C(=O)c2c(C(=O)N2C[C@@H](O)CC2)c1Oc1c2c(ccc1)cccc2	4.7	4.25	5.3279	1.0779	7.53142	35	0.215184
CHEMBL457	O(CCCC(C(O)=O)(C)C)c1cc(ccc1C)C	9.6	3.94	5.01773	1.07773	7.09297	18	0.394054
CHEMBL1086568	OC(=O)c1ccccc1NC(=O)CCc1cn(nc1)-c1ccccc1	15	3.75	4.82391	1.07391	6.81899	25	0.272759
CHEMBL488400	S(Cc1cc(OC)cc(OC)c1)c1[nH]c2cc(OC)ccc2n1	2.32	4.58	5.63451	1.05451	7.96484	23	0.346297
CHEMBL246161	Clc1ccccc1CNc1nc(NCC2CCNCC2)c([N+](=O)[O-])cn1	17.6	3.71	4.75449	1.04449	6.72085	26	0.258494
CHEMBL564920	S(=O)(=O)(N(C)[C@@H]1CCc2c(n3c(C=CC=C3)c2CC(O)=O)C1)c1ccc(F)cc1	17	3.73	4.76955	1.03955	6.74215	29	0.232488
CHEMBL517438	s1c2c(nc1Nc1ccc(cc1)[C@@H](n1ccnc1)[C@H](N(C)C)C)cccc2	5.9	4.19	5.22915	1.03915	7.39183	27	0.273771
CHEMBL473421	O=C1CCC(CC1)C(NC(=O)c1cc2c(cc1NC(=O)Nc1c(cc(cc1C)C)C)cccc2)C(O)=O	9.4	3.99	5.02687	1.03687	7.10589	37	0.192051
CHEMBL498840	O=C1N(C=CC=C1)C=1C=C(N[C@H]2c3c(C[C@@H]2O)cccc3)c2n(C=1)c(C)c(n2)C	97	2.98	4.01323	1.03323	5.67302	29	0.195622
CHEMBL2019024	S(Cc1ncccc1)c1[nH]c2c(n1)cc(cc2)C	50	3.27	4.30103	1.03103	6.07986	18	0.33777
CHEMBL1086475	Clc1cc2c(NC(=O)[C@@]23N[C@H](Cc2c3[nH]c3cc(Cl)ccc23)C)cc1	4.11	4.36	5.38616	1.02616	7.61377	25	0.304551
CHEMBL236162	Clc1cc(O)ccc1-c1sc(cn1)CCC(=O)Nc1ccccc1C(O)=O	2.8	4.53	5.55284	1.02284	7.84939	27	0.290718
CHEMBL601500	Clc1cc(N(Cc2ccccc2C)[C@H]2CCN(S(=O)(=O)C)C2)ccc1C#N	2.4	4.6	5.61979	1.01979	7.94403	27	0.294223
CHEMBL1087758	Fc1ccc(cc1)COc1nncc2c1n(C[C@H]1C[C@@H]1C)c(C)c2C	0.8	5.08	6.09691	1.01691	8.61848	25	0.344739
CHEMBL150146	O(CCCC)c1ccc(cc1)-c1nccnc1	36.8	3.42	4.43415	1.01415	6.26803	17	0.368708
CHEMBL239495	O1c2c(N(CCCOC)C(=O)C1(CC)CC)cc(cc2)-c1c(nc(nc1N)N)CC	15	3.81	4.82391	1.01391	6.81899	30	0.2273
CHEMBL358214	O(CCCC)c1ccc(-n2ccnc2C)cc1	10.2	3.98	4.9914	1.0114	7.05575	17	0.415044
CHEMBL391964	Fc1cc(C)c(cc1)[C@H]1CN(C[C@@H]1C(=O)N(Cc1cc(cc(c1)C(F)(F)F)C(F)(F)F)C)C(=O)C1CCN(CC1)C(=O)C	69	3.15	4.16115	1.01115	5.88213	43	0.136794
CHEMBL567487	Clc1ncc(cc1)C(=O)\N=C(\Nc1cc2cc(oc2cc1)C)/N[C@H]1CCCCN(CC(=O)N2CCCC2)C1=O	12	3.91	4.92082	1.01082	6.95598	39	0.178358
CHEMBL453169	O(C)c1cc2c(cc(cc2)-c2cnccc2N)cc1	48.97	3.3	4.31007	1.01007	6.09263	19	0.320665
CHEMBL2019023	S(Cc1ncccc1)c1[nH]c2c(n1)cc(OCC)cc2	24.2	3.61	4.61618	1.00618	6.52535	20	0.326268
CHEMBL1080982	O1CC(=O)N(CC1)c1nc(NCc2c(cccc2C)C)c2n(CCO)c(C)c(c2c1)C	13	3.88	4.88606	1.00606	6.90684	31	0.222801
CHEMBL235952	Oc1ccc(nc1)-c1ccc(cc1)CCC(=O)Nc1ccccc1C(O)=O	1.6	4.81	5.79588	0.98588	8.19295	27	0.303443
CHEMBL151646	O(CCCC)c1ccc(cc1)-c1cccnc1	7.52	4.14	5.12378	0.983782	7.24288	17	0.426052
CHEMBL475927	Clc1ccc(cc1)C(NC(=O)CNC(=O)c1ccc(cc1)C#N)c1ccccc1	14.7	3.85	4.83268	0.982683	6.83139	29	0.235565
CHEMBL2204469	Fc1cc(F)ccc1CN1N=C(C=CC1=O)Cc1c2cc(F)ccc2n(CC(O)=O)c1C	16	3.82	4.79588	0.97588	6.77937	32	0.211855
CHEMBL387620	Clc1cc(Nc2nc(C(F)(F)F)c(cn2)C(=O)NCC2(O)CCCCC2)ccc1	10	4.03	5	0.97	7.06791	29	0.243721
CHEMBL271310	Fc1cc(F)c(NC2=NC=Nn3c2c(C(C)C)c(c3)-c2oc(nn2)NCCCN(C)C)cc1C(=O)NC1CC1	39	3.44	4.40894	0.968935	6.23239	39	0.159805
CHEMBL577694	Clc1cc(ccc1)CNC(=O)CC1(OOC2(C1)CCCCC2)C	3.4	4.5	5.46852	0.968521	7.7302	23	0.336096
CHEMBL3142316	Cl.Cl.s1cccc1C(Nc1cc2[nH]cc(c2cc1)C=1CCN(CC=1)C)=N	72.7	3.17	4.13847	0.968466	5.85006	26	0.225002
CHEMBL590853	Clc1cc(N(Cc2ccccc2C(F)(F)F)[C@H]2CCN(C2)C(OC)=O)ccc1C#N	0.16	5.84	6.79588	0.95588	9.60653	30	0.320218
CHEMBL520136	Oc1cc2CCc3c(n[nH]c3CCC(=O)Nc3ccccc3C(O)=O)-c2cc1	26	3.63	4.58503	0.955027	6.48131	28	0.231475
CHEMBL1076245	O=C1N(CCC1)c1nc(NCc2c(cccc2C)C)c2[nH]c(C)c(c2c1)C	1.4	4.9	5.85387	0.953872	8.27492	27	0.306479
CHEMBL1909051	FC(F)(F)c1ccccc1C(=O)N1CCC(CC1)Cc1ccccc1	2	4.75	5.69897	0.94897	8.05596	25	0.322238
CHEMBL205845	s1c2N(CC(C)C)C(=O)N(C)C(=O)c2c(S[C@H]2C[C@@H](O)CC2)c1Cc1ccccc1C(F)(F)F	0.2	5.75	6.69897	0.94897	9.46954	34	0.278516
CHEMBL525001	O=C1N(C=CC=C1)C=1C=2CC[C@@H](NC=2c2n(C=1)c(C)c(n2)C)c1ccccc1	5.6	4.31	5.25181	0.941812	7.42386	28	0.265138
CHEMBL2018486	Fc1ccc(cc1)C[C@H]1C[C@H](N(C1)C(=O)Cn1ncnc1)C(=O)Nc1ccc(Oc2ccc(F)cc2)cc1	1.347	4.94	5.87063	0.930632	8.29862	38	0.218385
CHEMBL1649654	FC(F)(F)c1nn(c2c1CCCC2)-c1ccc(cc1)C(=O)N(CCc1ccccc1)C	1	5.07	6	0.93	8.48149	31	0.273596
CHEMBL1229205	S(C(C)(C)C)c1c2cc(OCc3ncc(cc3)C)ccc2n(Cc2ccc(cc2)-c2ncc(OC)cn2)c1CC(C(O)=O)(C)C	0.0045	7.42	8.34679	0.926787	11.7989	45	0.262197
CHEMBL3260743	Clc1ccc(cc1)C=1C=2N(N(Cc3ccc(nc3C)C(F)(F)F)C(=O)C=1c1ccncc1)C(=O)N(N=2)CC	4.2	4.45	5.37675	0.926751	7.60047	38	0.200012
CHEMBL592509	Clc1cc(N(Cc2ccccc2)[C@H]2CCN(C2)C(OC)=O)ccc1C#N	1.3	4.96	5.88606	0.926057	8.32042	26	0.320016
CHEMBL1784173	Fc1cc(cc(-c2ncc(cc2)C(=O)NCC(C)C)c1C)C(=O)NC1CC1	31.6228	3.58	4.5	0.92	6.36112	27	0.235597
CHEMBL113275	O(CCCCCCN(C)C)c1ccc(-n2ccnc2)cc1	33.2	3.56	4.47886	0.918862	6.33124	21	0.301487
CHEMBL94036	Clc1cc(-c2c3cc(ccc3nc(O)c2CCO)C(F)(F)F)c(OC)cc1	5.47	4.35	5.26201	0.912013	7.43828	27	0.275492
CHEMBL2059519	o1c(nnc1-c1cc(C#N)c(OC(C)C)cc1)-c1cccc(CCCC(O)=O)c1CC	7.94328	4.19	5.1	0.91	7.20927	31	0.232557
CHEMBL1079437	O=C1NC(=CC=C1)c1nc(NCc2c(cccc2C)C)c2[nH]c(C)c(c2c1)C	2.3	4.73	5.63827	0.908272	7.97016	28	0.284648
CHEMBL445897	Clc1ccncc1-c1oc(nc1)C(N1C[C@H](N(CC1)C[C@@H](O)C[C@@H](Cc1ccccc1)C(=O)NC1C2C(OC[C@H]1O)C=CC=C2)C(=O)NCC(F)(F)F)(C)C	21	3.77	4.67778	0.907781	6.61242	55	0.120226
CHEMBL2070154	S(=O)(=O)(CC)c1cc2nc([nH]c2cc1)-c1nc(ccc1)-c1ccccc1	14	3.95	4.85387	0.903872	6.86134	26	0.263898
CHEMBL2164048	O=C(Nc1ccccc1N1CCCC1)[C@@H](CC)c1ccccc1	18.9	3.82	4.72354	0.903538	6.67711	23	0.290309
CHEMBL1170481	Fc1c(cccc1F)CCC1=NC(=O)c2cccnc2N1CC(=O)N(Cc1ccc(cc1)-c1ccc(cc1)C(F)(F)F)C1CCN(CC1)c1ncncc1	0.1	6.1	7	0.9	9.89507	54	0.183242
CHEMBL590863	Clc1cc(N(Cc2ccccc2C(F)(F)F)[C@H]2CCN(S(=O)(=O)CC)C2)ccc1C#N	0.35	5.56	6.45593	0.895932	9.12599	31	0.294387
CHEMBL392464	Fc1cc(C)c(cc1)[C@@H]1CN(C[C@H]1c1onc(n1)C(C)(C)c1cc(cc(c1)C(F)(F)F)C(F)(F)F)C(=O)C1CCN(CC1)C(=O)C	89	3.16	4.05061	0.89061	5.72587	46	0.124475
CHEMBL114756	FC(F)(F)CNC(=O)[C@H]1N(CCN(C1)Cc1oc(cc1)-c1ccncc1)C[C@@H](O)C[C@@H](Cc1ccccc1)C(=O)N[C@H]1c2c(OC[C@H]1O)cccc2	5.5	4.37	5.25964	0.889637	7.43493	52	0.142979
CHEMBL91	Clc1cc(Cl)ccc1C(OCc1ccc(Cl)cc1Cl)Cn1ccnc1	0.2	5.81	6.69897	0.88897	9.46954	25	0.378782
CHEMBL539650	s1ccnc1-c1ccc(cc1)Cn1c2c(cc(OCc3ncccc3)cc2)c(SC(C)(C)C)c1CC(C(O)=O)(C)C	0.0091	7.16	8.04096	0.880959	11.3665	41	0.277233
CHEMBL3263640	O1CCN(CC1)C(=O)c1ccc(Nc2nc(nc3[nH]cnc23)-c2cccc(NC(=O)c3ccc(cc3)C(C)(C)C)c2C)cc1	0.4	5.52	6.39794	0.87794	9.04401	44	0.205546
CHEMBL2048199	S(Cc1cc(ccc1OC)C(=O)NCCCC)c1nc2cc(F)ccc2n1CC(O)=O	6	4.35	5.22185	0.871849	7.38151	31	0.238113
CHEMBL592755	Clc1cc(N(Cc2ccccc2C(F)(F)F)[C@H]2CCN(S(=O)(=O)CCC)C2)ccc1C#N	0.11	6.09	6.95861	0.868607	9.83656	32	0.307392
CHEMBL121323	S(=O)(=O)(N(C(C)C)c1n(ncc1)-c1ccccc1)c1ccc(N)cc1	80	3.23	4.09691	0.86691	5.79132	25	0.231653
CHEMBL1813477	N1C[C@]2([C@H](CCC2)C1)c1cc2c(cc1)cccc2	14.4	3.98	4.84164	0.861638	6.84405	18	0.380225
CHEMBL1645462	Fc1cc(ccc1)Cn1ncc2cc(NC3=NC=Nn4c3c(C)c(NC(OC[C@H]3NCCOC3)=O)c4)ccc12	12	4.06	4.92082	0.860819	6.95598	39	0.178358
CHEMBL1170725	Clc1cc(S(=O)(=O)Nc2cc(Cl)cnc2Oc2cccnc2C)ccc1Cl	1.34896	5.01	5.87	0.860001	8.29772	27	0.307323
CHEMBL1208959	s1c(C(=O)N)c(O[C@@H](C)c2ccccc2C(F)(F)F)cc1-n1c2c(nc1)cc(cc2)-c1cc(ncc1)N1CCN(CC1)C	0.2	5.84	6.69897	0.85897	9.46954	43	0.220222
CHEMBL361812	S(=O)(=O)(N[C@@H]1CCc2n(c3c(c2C1)cccc3)CCC(O)=O)c1ccc(F)cc1	15	3.97	4.82391	0.853909	6.81899	29	0.235138
CHEMBL565195	S(=O)(=O)(C)c1ccc(Nc2nc3cc(ccc3n2Cc2ccccc2C(F)(F)F)C(=O)N)cc1	15	3.97	4.82391	0.853909	6.81899	34	0.200558
CHEMBL313132	FC(F)(F)CNC(=O)[C@H]1N(CCN(C1)C(C)(C)c1oc(cn1)-c1cc(OC)cnc1)C[C@@H](O)C[C@@H](Cc1ccccc1)C(=O)NC1C2C(OC[C@H]1O)C=CC=C2	30	3.67	4.52288	0.852879	6.39346	56	0.114169
CHEMBL1643773	S(=O)(=O)(N(C)[C@@H]1CCc2n(C1)c1c(ccc(F)c1)c2CC(O)=O)c1ccc(F)cc1	13.6	4.02	4.86646	0.846461	6.87914	30	0.229305
CHEMBL2018484	Fc1ccc(Oc2ccc(NC(=O)[C@H]3N(C[C@@H](C3)Cc3ccccc3)C(=O)Cn3ncnc3)cc2)cc1	2.286	4.8	5.64092	0.840924	7.97391	37	0.215511
CHEMBL575448	Fc1ncc(NC(=O)[C@]2(N(CCC2)C=2N=C(Nc3[nH]nc(c3)C3CC3)c3n(N=2)ccc3)C)cc1	23	3.8	4.63827	0.838272	6.55658	34	0.19284
CHEMBL238866	Fc1cc(ccc1F)C1(Oc2c(N(CCCOC)C1=O)cc(cc2)-c1c(nc(nc1N)N)CC)C	8.3	4.25	5.08092	0.830922	7.1823	35	0.205208
CHEMBL1668020	Cl.O(c1ccc(cc1)CN1CCC2(N(CCCC)C(=O)[C@H](NC2=O)[C@@H](O)C2CCCCC2)CC1)c1ccc(cc1)C(O)=O	18	3.92	4.74473	0.824727	6.70706	43	0.155978
CHEMBL600465	Clc1cc(N(Cc2ccccc2C(F)(F)F)[C@H]2CCN(C2)C(=O)CC)ccc1C#N	1.2	5.1	5.92082	0.820819	8.36956	30	0.278985
CHEMBL520620	S1c2c(-n3cc(nc13)CCC(=O)Nc1ccccc1C(O)=O)cccc2	4.4	4.54	5.35655	0.816547	7.57192	26	0.291228
CHEMBL592896	Clc1cc(S(=O)(=O)N2CCC3(CC3NS(=O)(=O)C(F)(F)F)CC2)c(S(=O)(=O)c2ncccc2)cc1	15	4.01	4.82391	0.813909	6.81899	35	0.194828
CHEMBL567169	FC(F)(F)c1cc(ccc1)CNC(=O)CC1(OOC2(C1)CCCCC2)C	3.3	4.67	5.48149	0.811486	7.74853	26	0.29802
CHEMBL120183	S(=O)(=O)(N(CCC)c1n(ncc1)-c1ccccc1)c1ccc(N)cc1	55	3.45	4.25964	0.809637	6.02134	25	0.240854
CHEMBL2316582	FC(F)(F)c1cc(NC(=O)c2cc(C#Cc3cc4c([nH]nc4)nc3)c(cc2)C)ccc1CN1CCN(CC1)C	0.11	6.15	6.95861	0.808607	9.83656	39	0.252219
CHEMBL120426	S(=O)(=O)(Nc1n(ncc1)-c1ccccc1)c1ccc(cc1)-c1cc([N+](=O)[O-])ccc1	4	4.59	5.39794	0.80794	7.63043	30	0.254348
CHEMBL567292	Clc1cc(Nc2ncc(c3n(ccc23)C)C(=O)N2CCOCC2)ccc1	42	3.57	4.37675	0.806751	6.18689	26	0.237957
CHEMBL498220	Clc1cc(F)ccc1CNC1=CC(N2C=CC=CC2=O)=Cn2c1nc(C)c2C	3.7	4.63	5.4318	0.801798	7.67829	28	0.274225
CHEMBL523752	n12c(nc(C)c1C)C(NCc1c(cccc1C)CC)=CC=C2	1.5	5.03	5.82391	0.793909	8.23257	22	0.374208
CHEMBL572184	Brc1cc(ccc1)CNC(=O)CC1(OOC2(C1)CCCCC2)C	3.7	4.65	5.4318	0.781798	7.67829	23	0.333839
CHEMBL552567	S(C(C)(C)C)c1c2cc(OCc3ncccc3)ccc2n(Cc2ccc(cc2)-c2nnc(OC)cc2)c1CC(C(O)=O)(C)C	0.0269	6.79	7.57025	0.780248	10.7012	44	0.243208
CHEMBL495787	O=C1N(C=CC=C1)C=1C=C(NCc2ccccc2C)c2n(C=1)c(C)c(n2)C	10	4.22	5	0.78	7.06791	27	0.261774
CHEMBL1209018	Clc1ccccc1[C@H](Oc1cc(sc1C(=O)N)-n1c2c(nc1)cc(cc2)-c1cn(nc1)CCCN1CCN(CC1)CC)C	2.4	4.84	5.61979	0.779789	7.94403	43	0.184745
CHEMBL2017284	FC(F)(F)Oc1ccccc1N1c2c3cc(OC)c(cc3ncc2NC1=O)-c1c(noc1C)C	2.3	4.86	5.63827	0.778272	7.97016	34	0.234416
CHEMBL541214	Brc1c(sc(C(O)=O)c1OCC(O)=O)-c1cc(NC2CCN(S(=O)(=O)Cc3ccccc3)CC2)ccc1	40	3.62	4.39794	0.77794	6.21685	37	0.168023
CHEMBL1922663	S(C(C)(C)C)c1c2cc(OCc3ncc(cc3)C)ccc2n(Cc2ccc(cc2)-c2ncc(F)cc2)c1CC(C(O)=O)(C)C	0.0015	8.06	8.82391	0.763909	12.4733	44	0.283484
CHEMBL2018906	S(CC)c1[nH]c2c(n1)cc(OC)cc2	50	3.54	4.30103	0.76103	6.07986	14	0.434275
CHEMBL592016	Clc1cc(N(Cc2ccccc2C)[C@H]2CCN(C2)C(OC)=O)ccc1C#N	0.68	5.41	6.16749	0.757491	8.71825	27	0.322898
CHEMBL592289	Clc1cc(N(Cc2ccccc2F)[C@H]2CCN(C2)C(OC)=O)ccc1C#N	1.4	5.1	5.85387	0.753872	8.27492	27	0.306479
CHEMBL592745	Clc1cc(N(Cc2cccc(F)c2F)[C@H]2CCN(C2)C(OC)=O)ccc1C#N	1.2	5.17	5.92082	0.750819	8.36956	28	0.298913
CHEMBL2018924	S(Cc1nc2c(cc1)cccc2)c1[nH]c2c(n1)cc(OC)cc2	6.18	4.46	5.20901	0.749012	7.36336	23	0.320146
CHEMBL1242904	O1c2c(-n3c(ncc3)C1)cccc2CCN1CCN(CC1)c1c2c(nc(cc2)C)ccc1	4	4.65	5.39794	0.74794	7.63043	32	0.238451
CHEMBL149750	O(CCCC)c1ccc(cc1)-c1n[nH]cc1	19.6	3.96	4.70774	0.747744	6.65478	16	0.415924
CHEMBL252886	S(=O)(=O)(C(C)(C)c1cc(c2ncccc2c1)-c1cc(ccc1)-c1cc(ccc1)CCC(O)=O)C	7.2	4.4	5.14267	0.742668	7.26958	34	0.213811
CHEMBL1631540	O=C1NCCN1c1cc(ccc1)CCN1CCN(CC1)c1c2c(nc(cc2)C)ccc1	60	3.48	4.22185	0.741849	5.96793	31	0.192514
CHEMBL592532	Clc1cc(N(Cc2ccccc2C)[C@H]2CCN(C2)C(=O)CC)ccc1C#N	4	4.66	5.39794	0.73794	7.63043	27	0.282608
CHEMBL2036270	Cl.s1cccc1C(Nc1cc2c([nH]cc2C2CCC(NCC)CC2)cc1)=N	21.5	3.93	4.66756	0.737562	6.59798	27	0.24437
CHEMBL589624	Clc1cc(N(Cc2ccccc2C(F)(F)F)[C@H]2CCN(C2)C(=O)C(C)C)ccc1C#N	0.72	5.41	6.14267	0.732668	8.68316	31	0.280102
CHEMBL3092130	s1cc(nc1-n1nc(-c2ccccc2)c(N)c1-c1ccccc1)C(O)=O	5.62	4.52	5.25026	0.730264	7.42168	26	0.285449
CHEMBL590100	Clc1cc(N(Cc2cc(F)ccc2C)[C@H]2CCN(C2)C(=O)CC)ccc1C#N	2.9	4.81	5.5376	0.727602	7.82785	28	0.279566
CHEMBL219060	O(Cc1ccccc1)C(=O)N1CCC(CC1)CNc1ccncc1	6.5	4.46	5.18709	0.727087	7.33237	24	0.305515
CHEMBL2387605	Clc1ccccc1-c1[nH]c-2c(n1)C(=O)Nc1cc(ccc1-2)-c1cccnc1	25	3.88	4.60206	0.72206	6.50539	27	0.24094
CHEMBL2425147	O=C(Nc1ccc(-n2cnnc2)cc1)Nc1n(nc(c1)C(C)(C)C)-c1ccc(cc1)C	6.9	4.44	5.16115	0.721151	7.29571	31	0.235345
CHEMBL2018485	Fc1ccc(cc1)C[C@@H]1C[C@H](N(C1)C(=O)Cn1ncnc1)C(=O)Nc1ccc(Oc2ccc(F)cc2)cc1	2.187	4.94	5.66015	0.720151	8.00108	38	0.210555
CHEMBL2177836	Fc1cc(ccc1)C(=O)NCc1ccc(-n2c3nc(ccc3nc2-c2cccnc2N)-c2cc(NC(=O)C)ccc2)cc1	1	5.28	6	0.72	8.48149	43	0.197244
CHEMBL1082723	Clc1cc2[nH]c3c(C[C@@H](N[C@]34c3cc(Cl)ccc3NC4=O)C)c2cc1F	5.42	4.56	5.266	0.706001	7.44392	26	0.286305
CHEMBL538632	S(C(C)(C)C)c1c2cc(OCc3ncccc3)ccc2n(Cc2ccc(cc2)-c2cccnc2)c1CC(C(O)=O)(C)C	0.0155	7.11	7.80967	0.699668	11.0396	42	0.262848
CHEMBL607032	Clc1cc(S(=O)(=O)c2ccccc2F)c(S(=O)(=O)N2CCC(CC2)(CNS(=O)(=O)C(F)(F)F)CN)cc1	23	3.94	4.63827	0.698272	6.55658	37	0.177205
CHEMBL1807440	Fc1cc(cc(N2CCOCC2)c1)C(=O)Nc1cc(NC2=NC=Nn3c2c(C)c(c3)C(=O)c2ccccc2)c(cc1)C	0.35	5.76	6.45593	0.695932	9.12599	42	0.217285
CHEMBL222424	Fc1ccc(cc1)C1(NC(=O)N(C1)C1CCN(CC1)Cc1ccccc1)c1ccc(F)cc1	7	4.46	5.1549	0.694902	7.28687	33	0.220814
CHEMBL596387	Clc1cc(S(=O)(=O)c2ccccc2F)c(S(=O)(=O)N2CCC(CC2)(CNS(=O)(=O)C(F)(F)F)C)cc1	2	5.01	5.69897	0.68897	8.05596	36	0.223777
CHEMBL230205	O=C1NC=CC(N[C@@H](Cc2ccccc2)CO)=C1c1[nH]c2c(n1)c(cc(c2)-c1ccccc1)C	2.3	4.95	5.63827	0.688272	7.97016	34	0.234416
CHEMBL1760794	Clc1ccc(cc1)C1(CCC1)c1nnc(n1C)-c1ccc(cc1)-c1nccnc1	13	4.2	4.88606	0.686057	6.90684	29	0.238167
CHEMBL2385901	Fc1cc2c3c(n(c2cc1)CC(O)=O)CCN(C3)C(=O)Cc1c2c(ccc1)cccc2	16	4.11	4.79588	0.68588	6.77937	31	0.218689
CHEMBL403744	S(=O)(=O)(C(C)(C)c1cc(c2ncccc2c1)-c1cc(ccc1)-c1ccc(cc1)CC(C(O)=O)(C)C)C	1.6	5.11	5.79588	0.68588	8.19295	36	0.227582
CHEMBL590610	Clc1cc(N(Cc2ccccc2C(F)(F)F)[C@H]2CCN(S(=O)(=O)C(C)C)C2)ccc1C#N	0.28	5.87	6.55284	0.682842	9.26298	32	0.289468
CHEMBL2018911	S(CC1CC1)c1[nH]c2c(n1)cc(OC)cc2	22.1	3.98	4.65561	0.675608	6.58108	16	0.411318
CHEMBL162383	S(Cc1cc2c(nc1)N(c1nc(F)cc(c1NC2=O)C)CC)c1cc(nc(c1)C)C	4.5	4.68	5.34679	0.666788	7.55812	30	0.251937
CHEMBL1649660	FC(F)(F)c1nn(c2c1CCCC2)-c1ccc(cc1)C(=O)N(CCCC)C	6	4.56	5.22185	0.661849	7.38151	27	0.273389
CHEMBL324461	FC(F)(F)CNC(=O)[C@H]1N(CCN(C1)Cc1oc2c(c1)cccc2)C[C@@H](O)C[C@@H](Cc1cccnc1)C(=O)N[C@H]1c2c(OC[C@H]1O)cccc2	48.8	3.65	4.31158	0.66158	6.09477	50	0.121895
CHEMBL2070142	S(=O)(=O)(CCC)c1cc2nc([nH]c2cc1)-c1cc(ccc1)C(F)(F)F	7.4	4.47	5.13077	0.660768	7.25276	25	0.29011
CHEMBL473851	O([C@@H]([C@H](NC(=O)c1cc2c(cc1NC(=O)Nc1c(cc(cc1C)C)C)cccc2)C(O)=O)C)C(C)(C)C	1	5.34	6	0.66	8.48149	37	0.229229
CHEMBL1169994	Clc1cc(S(=O)(=O)Nc2cc(Cl)cnc2Oc2cc(Cl)cnc2)ccc1Cl	1.07152	5.31	5.97	0.66	8.43908	27	0.312559
CHEMBL239496	Fc1cc(cc(F)c1)C1(Oc2c(N(CCCOC)C1=O)cc(cc2)-c1c(nc(nc1N)N)CC)C	10.5	4.32	4.97881	0.658811	7.03795	35	0.201084
CHEMBL473852	O([C@@H]([C@H](NC(=O)c1cc2c(cc1NC(=O)Nc1c(cc(cc1C)C)C)cccc2)C(O)=O)C)C1CCC1	2.1	5.02	5.67778	0.657781	8.026	37	0.216919
CHEMBL3260744	Clc1ccc(cc1)C=1C=2N(N(Cc3ccc(nc3C)C(F)(F)F)C(=O)C=1c1ccncc1C)C(=O)N(N=2)CC	5	4.65	5.30103	0.65103	7.49344	39	0.192139
CHEMBL1649657	FC(F)(C(=O)N1CCCC1)c1ccc(-n2nc(c3CCCCc23)C(F)(F)F)cc1	4	4.75	5.39794	0.64794	7.63043	29	0.263118
CHEMBL2407897	O=C/1Nc2c(cccc2)\C\1=C/c1cc2[nH]nc(c2cc1)\C=C\c1ccc(cc1)CN(C)C	1.3	5.24	5.88606	0.646057	8.32042	32	0.260013
CHEMBL421841	S(Cc1cc2c(nc1)N(c1nccc(c1NC2=O)C)CC)c1cc(nc(c1)C)C	7.4	4.49	5.13077	0.640768	7.25276	29	0.250095
CHEMBL2415095	Fc1cc(C)c(cc1)[C@@H]1CCCn2nc(nc12)-c1cc(OC)c(-n2cc(nc2)C)cc1	5.66	4.61	5.24718	0.637184	7.41732	31	0.239268
CHEMBL118	S(=O)(=O)(N)c1ccc(-n2nc(cc2-c2ccc(cc2)C)C(F)(F)F)cc1	10	4.37	5	0.63	7.06791	26	0.271843
CHEMBL1834658	Clc1c(NC(=O)N(C)c2ncnc(Nc3cc(N4CCN(CC4)C)ccc3)c2)c(Cl)c(OC)cc1OC	1.7	5.14	5.76955	0.629551	8.15573	37	0.220425
CHEMBL2070160	S(=O)(=O)(C(F)(F)F)c1cc2nc([nH]c2cc1)C=1C=CC(=O)N(C=1)c1ccccc1	7.5	4.5	5.12494	0.624939	7.24452	29	0.249811
CHEMBL565362	Brc1cc(F)c(cc1)CNC(=O)CC1(OOC2(C1)CCCCC2)C	3.9	4.79	5.40894	0.618935	7.64597	24	0.318582
CHEMBL1086104	Oc1ccc(-n2ncc(CC(C(=O)Nc3ccccc3C(O)=O)C)c2C)cc1	22	4.04	4.65758	0.617577	6.58386	28	0.235138
CHEMBL2415099	FC(F)(F)c1ccccc1[C@@H]1CCCn2nc(nc12)-c1nc(OC)c(-n2cc(nc2)C)cc1	8.51	4.46	5.07007	0.61007	7.16696	33	0.217181
CHEMBL252887	S(=O)(=O)(C(C)(C)c1cc(c2ncccc2c1)-c1cc(ccc1)-c1ccc(cc1)CCC(O)=O)C	9.8	4.4	5.00877	0.608774	7.08031	34	0.208244
CHEMBL1224655	s1cc(nc1-c1cc(ccc1)-c1ccccc1OC(F)(F)F)C(=O)N	8.79	4.45	5.05601	0.606011	7.14708	25	0.285883
CHEMBL1081505	n1c2c(n(C)c1C)cccc2NCc1c(cccc1C)C	8.8	4.45	5.05552	0.605517	7.14639	21	0.340304
CHEMBL565983	FC(F)(F)Oc1ccc(cc1)CNC(=O)CC1(OOC2(C1)CCCCC2)C	4	4.81	5.39794	0.58794	7.63043	27	0.282608
CHEMBL205526	s1c2N(CC(C)C)C(=O)N(C)C(=O)c2c(SCCCO)c1Cc1c2c(ccc1)cccc2	0.5	5.72	6.30103	0.58103	8.90702	32	0.278344
CHEMBL565360	S(c1ccccc1CNC(=O)CC1(OOC2(C1)CCCCC2)C)c1ccccc1CO	2.2	5.08	5.65758	0.577577	7.99745	31	0.257982
CHEMBL520413	FC(F)(F)Oc1cc(Nc2ncc(C(=O)NCC3CCOCC3)c(c2)C2CC2)ccc1	16	4.22	4.79588	0.57588	6.77937	31	0.218689
CHEMBL1224195	FC(F)(F)c1ccc(cc1-c1cc(-n2nc(cc2C)C(=O)N)ccc1)C(F)(F)F	2.6	5.01	5.58503	0.575027	7.89489	29	0.272238
CHEMBL3287894	O1c2cc(ccc2N(CC1CC)C(=O)Nc1ccccc1)-c1ccc(OCC(C(O)=O)(C)C)nc1	0.5	5.73	6.30103	0.57103	8.90702	35	0.254486
CHEMBL96347	Fc1cc(F)cc(F)c1CN1c2c(cccc2)[C@@](NCC1=O)([C@H](Oc1cc(cc(c1)C)C)C(O)=O)c1ccccc1	15	4.26	4.82391	0.563909	6.81899	41	0.166317
CHEMBL226386	Clc1cc(Nc2nc(C(F)(F)F)c(cn2)C(=O)NCC2CCCC2)ccc1	6	4.66	5.22185	0.561849	7.38151	27	0.273389
CHEMBL561788	FC(F)(F)c1ccccc1-c1nc(on1)C1CCN(CC1)C(=O)NC1CC1c1ccccc1	10	4.44	5	0.56	7.06791	33	0.214179
CHEMBL2347323	Brc1nc([nH]c1-c1ccc(N=[N+]=[N-])cc1)[C@H]1N(CCC1)C(=O)[C@@H](NC(OC)=O)C(C)C	50.5	3.74	4.29671	0.556709	6.07375	31	0.195927
CHEMBL2177582	Clc1ccc(NC(=O)[C@H]2CN(C[C@@H]2c2ccc(cc2F)\C=C\C(=O)Nc2ccccc2N)C)cc1	13	4.33	4.88606	0.556057	6.90684	35	0.197338
CHEMBL2070143	S(=O)(=O)(CCC)c1cc2nc([nH]c2cc1)-c1cc(OC(F)(F)F)ccc1	5.6	4.7	5.25181	0.551812	7.42386	26	0.285533
CHEMBL480398	Brc1cc(Nc2ncc(C(=O)NCC3CCOCC3)c(c2)C2CC2)ccc1	24	4.07	4.61979	0.549789	6.53045	27	0.241868
CHEMBL121048	S(=O)(=O)(N(CCO)c1n(ncc1)-c1ccccc1)c1ccc(cc1)-c1cc([N+](=O)[O-])ccc1	20	4.15	4.69897	0.54897	6.64238	33	0.201284
CHEMBL1085616	Fc1cc(cc(F)c1)C1CC(C(O)=O)=C(NC(=O)C(Cc2nn(cc2)-c2ncc(O)cc2)C)CC1	23	4.09	4.63827	0.548272	6.55658	35	0.187331
CHEMBL592746	Clc1cc(N(Cc2ccccc2C(F)(F)F)[C@H]2CCN(C2)C(=O)C(C)(C)C)ccc1C#N	0.44	5.81	6.35655	0.546547	8.9855	32	0.280797
CHEMBL319862	O\N=C\Nc1cc(ccc1C)CCCC	24	4.08	4.61979	0.539789	6.53045	15	0.435363
CHEMBL2425146	O=C(Nc1ccc(-n2ccnc2)cc1)Nc1n(nc(c1)C(C)(C)C)-c1ccc(cc1)C	0.8	5.56	6.09691	0.53691	8.61848	31	0.278015
CHEMBL433737	o1nc(cc1)-c1ccc(OCCCC)cc1	43.3	3.83	4.36351	0.533512	6.16818	16	0.385511
CHEMBL473643	O(C(C)C)C[C@H](NC(=O)c1cc2c(cc1NC(=O)Nc1c(cc(cc1C)C)C)cccc2)C(O)=O	6.92	4.63	5.15989	0.529894	7.29393	35	0.208398
CHEMBL605078	Clc1cc(N(Cc2ccccc2C(F)(F)F)[C@H]2CCN(C2)C(=O)[C@@H](O)C)ccc1C#N	2.4	5.09	5.61979	0.529789	7.94403	31	0.256259
CHEMBL1818291	O(C(C)(C)C)C(=O)NCC1CCC(CC1)CNC(=O)c1cc(nc2c1cccc2)-c1cc(ccc1)CN	0.8	5.57	6.09691	0.52691	8.61848	37	0.232932
CHEMBL221401	Fc1cc(ccc1)CN1CCC(N2CC(NC2=O)(c2ccc(F)cc2)c2ccc(F)cc2)CC1	7.3	4.61	5.13668	0.526677	7.26111	34	0.213562
CHEMBL1760809	Clc1cc(ccc1-c1nnc(n1C)C1(CC(F)C1)c1ccc(Cl)cc1)-c1nccnc1	26	4.06	4.58503	0.525027	6.48131	31	0.209074
CHEMBL236902	O(Cc1ccccc1)C(=O)N1CCN(C[C@@H]1C)c1ncc(cc1)C(=O)Nc1ccccc1N	24.5	4.09	4.61083	0.520834	6.51779	33	0.197509
CHEMBL1088752	Fc1cc(cc(-c2ncc(cc2)C(=O)NCC(C)(C)C)c1C)C(=O)NC1CC1	31.6228	3.98	4.5	0.52	6.36112	28	0.227183
CHEMBL1777878	FC(F)(F)c1cc(OC(F)F)c(Oc2ccc(cc2)[C@H](C#CC)[C@H]2OC(=O)NC2=O)cc1	2.4	5.1	5.61979	0.519789	7.94403	32	0.248251
CHEMBL356594	O(CCCC)c1ccc(cc1)-c1n[nH]c(c1)C	17.8	4.23	4.74958	0.51958	6.71392	17	0.394936
CHEMBL2070152	S(=O)(=O)(CC)c1cc2nc([nH]c2cc1)-c1cccc(-c2ccccc2)c1C	4.4	4.84	5.35655	0.516547	7.57192	27	0.280441
CHEMBL593596	Clc1cc(S(=O)(=O)c2ccccc2F)c(S(=O)(=O)N2CCC(F)(CC2)CNS(=O)(=O)C(F)(F)F)cc1	7	4.64	5.1549	0.514902	7.28687	36	0.202413
CHEMBL572255	Clc1ccc(NC(=O)c2ccc(nc2C)C(F)(F)F)cc1-c1nc2c(n1C)cccc2	2.5	5.09	5.60206	0.51206	7.91897	31	0.255451
CHEMBL1784174	Fc1cc(cc(-c2ncc(cc2)C(=O)N[C@@H](C(C)C)C)c1C)C(=O)NC1CC1	39.8107	3.89	4.4	0.51	6.21976	28	0.222134
CHEMBL1784175	Fc1cc(cc(-c2ncc(cc2)C(=O)N[C@H](C(C)C)C)c1C)C(=O)NC1CC1	39.8107	3.89	4.4	0.51	6.21976	28	0.222134
CHEMBL560537	O=C(NCCC(c1ccccc1)c1ccccc1)c1cccnc1	30	4.02	4.52288	0.502879	6.39346	24	0.266394
CHEMBL408443	Fc1c2cc([nH]c2ccc1OC1=NC=Nn2c1c(C)c(OC[C@H](OC(=O)[C@@H](N)CC(C)C)C)c2)C	2.7	5.08	5.56864	0.488636	7.87172	35	0.224906
CHEMBL2170750	s1c2cc(O)ccc2nc1C(=O)c1cc(O)c(F)cc1	54	3.78	4.26761	0.487606	6.03261	20	0.30163
CHEMBL16596	Clc1ccc(cc1)Cn1c2c(cc(OCc3nc4c(cc3)cccc4)cc2)c(SC(C)(C)C)c1CC(C(O)=O)(C)C	0.0005	8.82	9.30103	0.48103	13.1478	41	0.320677
CHEMBL2017274	o1nc(C)c(-c2cc3ncc(C(=O)N)c(Nc4ccccc4C(C)(C)C)c3cc2OC)c1C	1.2	5.44	5.92082	0.480819	8.36956	33	0.253623
CHEMBL1171887	Fc1ccc(cc1-c1cncnc1)CCN1CCN(CC1)c1c2c(nc(cc2)C)ccc1	10	4.52	5	0.48	7.06791	32	0.220872
CHEMBL2070139	S(=O)(=O)(CCC)c1cc2nc([nH]c2cc1)-c1ccccc1-c1ccccc1	4.5	4.87	5.34679	0.476787	7.55812	27	0.27993
CHEMBL1642258	Clc1cnc(nc1Nc1ccc(N2CCOCC2)cc1OC)Nc1cc2CCN(CCc2cc1OC)CC(=O)N(C)C	1.8	5.27	5.74473	0.474727	8.12064	42	0.193349
CHEMBL121420	S(=O)(=O)(N(CCCCO)c1n(ncc1)-c1ccccc1)c1ccc(cc1)-c1cc([N+](=O)[O-])ccc1	15	4.35	4.82391	0.473909	6.81899	35	0.194828
CHEMBL595913	Clc1cc(S(=O)(=O)c2ccccc2F)c(S(=O)(=O)N2CCC(CC2)(CNS(=O)(=O)C(F)(F)F)c2ccccc2)cc1	0.3	6.05	6.52288	0.472879	9.22062	41	0.224893
CHEMBL218067	O(Cc1ccccc1)C(=O)N1CCC(CC1)CNc1cccnc1	12	4.46	4.92082	0.460819	6.95598	24	0.289832
CHEMBL1952142	FC(F)(F)Oc1cc(-n2nnc3c2nc(NCC2CCNCC2)cc3OC)ccc1	8.7	4.6	5.06048	0.460481	7.1534	30	0.238447
CHEMBL239497	Fc1cc(cc(F)c1)C1(Oc2c(N(CCCOC)C1=O)cc(cc2)-c1c(nc(nc1N)N)CC)CC	4.9	4.85	5.3098	0.459804	7.50584	36	0.208496
CHEMBL2017276	o1nc(C)c(-c2cc3ncc(C(=O)N)c(Nc4ccccc4C(=O)c4ncccc4)c3cc2OC)c1C	9.9	4.55	5.00436	0.454365	7.07408	37	0.191191
CHEMBL2177588	Clc1ccc(NC(=O)[C@@H]2CN(C[C@H]2c2ccc(cc2)\C=C\C(=O)Nc2ccccc2N)C)cc1	23	4.19	4.63827	0.448272	6.55658	34	0.19284
CHEMBL496402	O=C1N(C=CC=C1)C=1C=C(N[C@@H]2CCc3c2cccc3)c2n(C=1)c(C)c(n2)C	23	4.19	4.63827	0.448272	6.55658	28	0.234163
CHEMBL1813478	Clc1cc(ccc1Cl)[C@@]12[C@@H](CCC1)CN(C2)C	9.83	4.56	5.00745	0.447447	7.07843	17	0.416378
CHEMBL2017268	o1nc(C)c(-c2cc3ncc(C(=O)N)c(Nc4ccccc4C(C)(C)C)c3cc2)c1C	0.7	5.71	6.1549	0.444902	8.70045	31	0.28066
CHEMBL607030	Brc1ccccc1CN([C@H]1CCN(C1)C(=O)CC)c1cc(Cl)c(cc1)C#N	3	5.08	5.52288	0.442879	7.80704	27	0.28915
CHEMBL2415097	FC(F)(F)c1ccccc1[C@@H]1CCCn2nc(nc12)-c1cc(OC)c(-n2cc(nc2)C)cc1	4.64	4.9	5.33348	0.433482	7.53931	33	0.228464
CHEMBL359116	O(CCCC)c1ccc(cc1)-c1cc[nH]c1	25	4.17	4.60206	0.43206	6.50539	16	0.406587
CHEMBL2018915	S(Cc1ccccc1)c1[nH]c2c(n1)cc(OC)cc2	9.73	4.58	5.01189	0.431887	7.08471	19	0.37288
CHEMBL1221	Clc1cc(Cl)ccc1C(SCc1ccc(Cl)cc1)Cn1ccnc1	0.2	6.27	6.69897	0.42897	9.46954	24	0.394564
CHEMBL1241640	O1c2c(-n3c(C1)c(nc3)C(OCC)=O)cccc2CCN1CCN(CC1)c1c2c(nc(cc2)C)ccc1	4	4.97	5.39794	0.42794	7.63043	37	0.206228
CHEMBL231610	Clc1cc(ccc1)C(O)CNC=1C=CNC(=O)C=1c1[nH]c2c(n1)c(cc(c2)C(=O)NC1CCCCC1)C	6.6	4.76	5.18046	0.420456	7.323	37	0.197919
CHEMBL389908	Clc1cc(Nc2nc(C(F)(F)F)c(cn2)C(=O)NCc2ccc(F)cc2)ccc1	8	4.68	5.09691	0.41691	7.2049	29	0.248445
CHEMBL591327	Clc1cc(N(Cc2cc(F)ccc2C)[C@H]2CCN(C2)C(OC)=O)ccc1C#N	1.1	5.55	5.95861	0.408607	8.42298	28	0.300821
CHEMBL1092931	Clc1cc(ccc1)-c1oc(C)c(n1)COc1cc(ccc1)CN(CC(O)=O)C(Oc1ccc(cc1)C)=O	0.5	5.9	6.30103	0.40103	8.90702	37	0.24073
CHEMBL406917	Brc1ccc(-n2c(nnc2SCc2ccccc2)-c2ccncc2)cc1	4.3	4.97	5.36653	0.396532	7.58603	26	0.29177
CHEMBL2017283	o1nc(C)c(-c2cc3ncc4NC(=O)N(c4c3cc2OC)c2ccccc2C(C)(C)C)c1C	0.9	5.65	6.04576	0.395757	8.54617	33	0.258975
CHEMBL3114731	s1cncc1COC(=O)N(Cc1ccccc1)CC[C@@H](NC(=O)[C@@H](NC(=O)N(Cc1nc(sc1)C(C)C)C)CCN1CCOCC1)Cc1ccccc1	8.1	4.71	5.09152	0.381515	7.19727	53	0.135798
CHEMBL553174	S(C(C)(C)C)c1c2cc(OCc3ncccc3)ccc2n(Cc2ccc(cc2)-c2ccc(nc2)C)c1CC(C(O)=O)(C)C	0.01	7.62	8	0.38	11.3087	43	0.262992
CHEMBL3261425	S(=O)(=O)(N[C@@H](CNc1c2c(n(nc2)-c2ccc(F)nc2)ccc1)C)c1c(n(nc1C)C1CCCC1)C	17	4.39	4.76955	0.379551	6.74215	36	0.187282
CHEMBL2018905	S(CCC)c1[nH]c2c(n1)cc(OC)cc2	35.8	4.07	4.44612	0.376117	6.28495	15	0.418997
CHEMBL1090189	o1c(nc(COc2cc(ccc2)CN(CC(O)=O)C(Oc2ccc(cc2)C)=O)c1C)-c1ccc(OC)cc1	2.8	5.18	5.55284	0.372842	7.84939	38	0.206563
CHEMBL1080803	O=C1N(C=CC=C1)c1nc(NCc2c(cccc2C)C)c2n(CCO)c(C)c(c2c1)C	11.4	4.58	4.9431	0.363095	6.98747	31	0.225402
CHEMBL271240	o1c(nc(CCOc2cc(ccc2)C[C@H]2[C@H](N(C2=O)c2ccc(OC)cc2)C(O)=O)c1C)-c1ccccc1	2.2	5.3	5.65758	0.357577	7.99745	38	0.210459
CHEMBL603321	Clc1cc(S(=O)(=O)c2ccccc2F)c(S(=O)(=O)N2CCC(CC2)CNS(=O)(=O)C(F)(F)F)cc1	14	4.5	4.85387	0.353872	6.86134	35	0.196038
CHEMBL197202	Fc1cc(ccc1-c1ccc(cc1)-c1ccc(O)cc1)C(C(O)=O)C	4.7	4.98	5.3279	0.347902	7.53142	25	0.301257
CHEMBL2177587	Clc1ccc(NC(=O)[C@H]2CN(C[C@@H]2c2ccc(cc2)\C=C\C(=O)Nc2ccccc2N)C)cc1	29	4.19	4.5376	0.347602	6.41427	34	0.188655
CHEMBL1224197	s1cc(nc1C(=O)N)-c1cc(ccc1)-c1ccccc1OC(F)(F)F	16	4.45	4.79588	0.34588	6.77937	25	0.271175
CHEMBL1016	O(CC)c1nc2c(n1Cc1ccc(cc1)-c1ccccc1-c1[nH]nnn1)c(ccc2)C(O)=O	3	5.18	5.52288	0.342879	7.80704	33	0.236577
CHEMBL152968	s1c2c(nc1C)cc(OC[C@H](O)CN1CCN(CC1)CC(=O)Nc1cc(ccc1)-c1ccccc1)cc2	24	4.28	4.61979	0.339789	6.53045	37	0.176499
CHEMBL1081870	n1c2c(n(C)c1C)ccnc2NCc1c(cccc1C)C	68	3.83	4.16749	0.337491	5.89109	21	0.280528
CHEMBL1821837	Fc1cc(F)cnc1Cn1c2c(nc1)cc(cc2)C(=O)N[C@@H](CC)c1ccccc1	42	4.04	4.37675	0.336751	6.18689	30	0.20623
CHEMBL164261	Clc1nc2N(c3ncc(cc3C(=O)Nc2c(c1)C)CSc1cc(nc(c1)C)C)CC	2.6	5.25	5.58503	0.335027	7.89489	30	0.263163
CHEMBL1171708	n1c2c(ccc1C)c(N1CCN(CC1)CCc1cc(ccc1)-c1cncnc1)ccc2	19.9526	4.37	4.7	0.33	6.64383	31	0.214317
CHEMBL519796	FC1(F)CCC(CC1)C(NC(=O)c1cc2c(cc1NC(=O)Nc1c(cc(cc1C)C)C)cccc2)C(O)=O	0.65	5.86	6.18709	0.327087	8.74595	38	0.230157
CHEMBL469227	Oc1ccc2c(ccc(c2)-c2cc(O)ccc2)c1-c1ccccc1	1.64	5.46	5.78516	0.325156	8.17779	24	0.340741
CHEMBL331485	S(=O)(=O)(N(CCCC)c1n(ncc1)-c1ccccc1)c1ccc(N)cc1	50	3.98	4.30103	0.32103	6.07986	26	0.233841
CHEMBL1079957	O=C1NCCN1c1nc(NCc2c(cccc2C)C)c2[nH]c(C)c(c2c1)C	2.7	5.25	5.56864	0.318636	7.87172	27	0.291545
CHEMBL523411	FC(F)(F)c1ccc(NC(=O)Nc2cc(ccc2)-c2nn(cc2-c2c3cc[nH]c3ncc2)CC)cc1	1.25893	5.59	5.9	0.309998	8.34013	36	0.23167
CHEMBL558664	Clc1cc(N(Cc2ccccc2C(F)(F)F)[C@H]2CCN(C2)C)ccc1C#N	1.1	5.65	5.95861	0.308607	8.42298	27	0.311962
CHEMBL230308	Fc1ccc(cc1)-c1cc(c2nc([nH]c2c1)C=1C(=O)NC=CC=1N[C@@H](Cc1ccccc1)CO)C	4	5.09	5.39794	0.30794	7.63043	35	0.218012
CHEMBL2386079	OC(=O)Cn1c2CCN(Cc2c2c1cccc2)C(=O)c1c2c(ccc1)cccc2	40	4.09	4.39794	0.30794	6.21685	29	0.214374
CHEMBL241970	S(=O)(=O)(C)c1ccc(-n2nc(cc2-c2ccc(cc2)C)C(F)(F)F)cc1	16	4.49	4.79588	0.30588	6.77937	26	0.260745
CHEMBL602851	Clc1cc(N(Cc2ccccc2C(F)(F)F)[C@H]2CCN(S(=O)(=O)CC(C)C)C2)ccc1C#N	0.16	6.49	6.79588	0.30588	9.60653	33	0.291107
CHEMBL1917389	Clc1cc(C#Cc2cc(Cl)ccc2)c(OCC(O)=O)cc1	1.44	5.55	5.84164	0.291638	8.25763	21	0.39322
CHEMBL209689	OC(=O)Cn1c2c(cc(cc2)C)c(-c2c3c(ncc2)c(ccc3)C)c1C	5	5.01	5.30103	0.29103	7.49344	26	0.288209
CHEMBL592510	Clc1cc(N(Cc2ccccc2Cl)[C@H]2CCN(C2)C(OC)=O)ccc1C#N	1.1	5.67	5.95861	0.288607	8.42298	27	0.311962
CHEMBL248458	O1CC(=O)N(c2cc(ccc12)CN1CCN(CC1)CCOc1c2c(nc(cc2)C)ccc1)CC	14	4.57	4.85387	0.283872	6.86134	34	0.201804
CHEMBL1090479	O=C(Nc1ccc(cc1)-c1nn(cc1-c1c2cc([nH]c2ncc1)-c1cc(ccc1)CN(C)C)CC)N(C)C	38	4.14	4.42022	0.280216	6.24834	38	0.16443
CHEMBL473828	O([C@@H]([C@H](NC(=O)c1cc2c(cc1NC(=O)Nc1c(cc(cc1C)C)C)cccc2)C(O)=O)C)C	32	4.24	4.49485	0.25485	6.35384	34	0.186878
CHEMBL153741	s1c2c(nc1C)cc(OC[C@H](O)CN1CCN(CC1)CC(=O)Nc1ccc(cc1)-c1ccccc1)cc2	30	4.28	4.52288	0.242879	6.39346	37	0.172796
CHEMBL2070149	Clc1c(cccc1-c1[nH]c2c(n1)cc(S(=O)(=O)CC)cc2)-c1ccccc1	4	5.16	5.39794	0.23794	7.63043	27	0.282608
CHEMBL1642915	Clc1cc(ccc1Cl)[C@H]1c2c(CC[C@H]1NC)cccc2	7.6	4.89	5.11919	0.229186	7.23639	20	0.361819
CHEMBL150653	O(CCCC)c1ccc(cc1)-c1ncccc1	26.4	4.35	4.5784	0.228396	6.47194	17	0.380702
CHEMBL1784177	Fc1cc(cc(-c2ncc(cc2)C(=O)N[C@H](C(C)(C)C)C)c1C)C(=O)NC1CC1	31.6228	4.28	4.5	0.22	6.36112	29	0.219349
CHEMBL464234	S(=O)(=O)(N1C[C@@H](N(CC1)c1ncc(cc1F)C(F)(F)F)C)C[C@]12CC[C@H](C[C@@H]1O)C2(C)C	4	5.18	5.39794	0.21794	7.63043	32	0.238451
CHEMBL1079958	O=C1N(C=CC=C1)c1nc(NCc2c(cccc2C)C)c2n(CC)c(C)c(c2c1)C	0.7	5.94	6.1549	0.214902	8.70045	30	0.290015
CHEMBL392525	Clc1cnc2[nH]c(nc2c1N1CCN(CC1)CC(=O)Nc1sccn1)-c1ccc(N(C)C)cc1	10	4.79	5	0.21	7.06791	34	0.20788
CHEMBL223079	Clc1cc(ccc1)CN1CCC(N2CC(NC2=O)(c2ccc(F)cc2)c2ccc(F)cc2)CC1	4.2	5.17	5.37675	0.206751	7.60047	34	0.223543
CHEMBL600466	Clc1cc(N(Cc2ccccc2C)[C@H]2CCN(C2)C(=O)[C@@H](O)C)ccc1C#N	14	4.66	4.85387	0.193872	6.86134	28	0.245048
CHEMBL321814	Clc1c2oc(cc2ccc1)CN1C[C@H](N(CC1)C[C@@H](O)C[C@@H](Cc1cccnc1)C(=O)N[C@H]1c2c(OC[C@H]1O)cccc2)C(=O)NCC(F)(F)F	27.3	4.37	4.56384	0.193837	6.45136	51	0.126497
CHEMBL475822	O(C(C)(C)C)C[C@@H](NC(=O)c1cc2c(cc1NC(=O)Nc1c(cc(cc1C)C)C)cccc2)C(O)=O	6	5.03	5.22185	0.191849	7.38151	36	0.205042
CHEMBL1831092	O(C(=O)C(C(n1ncnc1)c1ccc(Nc2cc3c(cc2)cccc3)cc1)(C)C)C	21.4	4.48	4.66959	0.189586	6.60084	30	0.220028
CHEMBL534942	Cl.Clc1ccccc1CC(N1CCNCC1)c1ccccc1	23	4.46	4.63827	0.178272	6.55658	22	0.298026
CHEMBL3260754	Clc1ccc(cc1)C=1C=2N(N(Cc3ccc(nc3C)C(F)(F)F)C(=O)C=1c1ccncc1F)C(=O)N(N=2)CC	14	4.68	4.85387	0.173872	6.86134	39	0.175932
CHEMBL475834	O(CCCC)C[C@H](NC(=O)c1cc2c(cc1NC(=O)Nc1c(cc(cc1C)C)C)cccc2)C(O)=O	2.8	5.38	5.55284	0.172842	7.84939	36	0.218039
CHEMBL333210	S(=O)(=O)(N(CCCO)c1n(ncc1)-c1ccccc1)c1ccc(cc1)CC=C	80	3.93	4.09691	0.16691	5.79132	28	0.206833
CHEMBL2375587	O(CCCN1CCCCC1)c1ccc(cc1)C1CCC(O)CC1	40.3	4.23	4.39469	0.164695	6.21226	23	0.270098
CHEMBL596388	Clc1cc(S(=O)(=O)c2ccccc2F)c(S(=O)(=O)N2CCC(CC2)(CC)CNS(=O)(=O)C(F)(F)F)cc1	2	5.54	5.69897	0.15897	8.05596	37	0.217729
CHEMBL585848	Clc1cc(N(Cc2cc(F)ccc2C)[C@H]2CCN(C2)C(=O)[C@@H](O)C)ccc1C#N	11	4.8	4.95861	0.158607	7.0094	29	0.241703
CHEMBL2387594	Clc1ccccc1-c1[nH]c-2c(n1)C(=O)Nc1cc(ccc1-2)CC	21	4.52	4.67778	0.157781	6.61242	23	0.287497
CHEMBL475449	O1CCOC12CCC(CC2)C(NC(=O)c1cc2c(cc1NC(=O)Nc1c(cc(cc1C)C)C)cccc2)C(O)=O	6.7	5.02	5.17393	0.153925	7.31376	40	0.182844
CHEMBL1080472	O=C1N(C=CC=C1)c1nc(NCc2c(cccc2C)C)c2[nH]c(C)c(c2c1)C	3.3	5.33	5.48149	0.151486	7.74853	28	0.276733
CHEMBL2070141	S(=O)(=O)(CCC)c1cc2nc([nH]c2cc1)-c1ccc(cc1)-c1ccccc1	2.4	5.47	5.61979	0.149789	7.94403	27	0.294223
CHEMBL3105228	Clc1ccc(cc1)[C@@]12N(CCN1C(=O)c1cc(F)c(F)cc1)C(=O)c1c2cccc1	7.4	5	5.13077	0.130768	7.25276	30	0.241759
CHEMBL1257706	Fc1ccc(cc1)[C@H]1[C@H]2N(C[C@@H]1O[C@H](C)c1cc(cc(c1)C(F)(F)F)C(F)(F)F)C(=O)[C@@H]1[C@H]2C[C@](O)(C1)C	43.12	4.24	4.36532	0.125321	6.17074	38	0.162388
CHEMBL1080088	O=C1N(C=CC=C1)c1nc(NCc2c(cccc2C)C)c2n(CC=C)c(C)c(c2c1)C	0.5	6.18	6.30103	0.12103	8.90702	31	0.287323
CHEMBL1784176	Fc1cc(cc(-c2ncc(cc2)C(=O)N[C@@H](C(C)(C)C)C)c1C)C(=O)NC1CC1	39.8107	4.28	4.4	0.12	6.21976	29	0.214474
CHEMBL120797	S(=O)(=O)(N(Cc1ccccc1)c1n(ncc1)-c1ccccc1)c1ccc(N)cc1	55	4.16	4.25964	0.0996373	6.02134	29	0.207633
CHEMBL496605	O=C1N(C=CC=C1)C=1C=C(NCc2c(cccc2C)C)c2n(C=1)c(C)c(n2)C	17	4.67	4.76955	0.0995511	6.74215	28	0.240791
CHEMBL608263	Clc1cc(Cl)ccc1CNC(=O)N1CCC(Oc2ccc(cc2)C(O)=O)CC1	20	4.6	4.69897	0.09897	6.64238	28	0.237228
CHEMBL245742	Clc1cc(S(=O)(=O)c2ccccc2F)c(S(=O)(=O)c2ccc(cc2)[C@@H](NS(=O)(=O)C(F)(F)F)C)cc1	3.5	5.36	5.45593	0.095932	7.7124	36	0.214233
CHEMBL2018916	S(Cc1ccc(cc1)C)c1[nH]c2c(n1)cc(OC)cc2	6.73	5.08	5.17199	0.0919849	7.31102	20	0.365551
CHEMBL440964	O(C)c1ccc(cc1)-c1cc(c2nc([nH]c2c1)C=1C(=O)NC=CC=1N[C@@H](Cc1ccccc1)CO)C	11	4.87	4.95861	0.0886073	7.0094	36	0.194705
CHEMBL2170754	s1c2cc(O)ccc2nc1C(=O)c1cc(O)c(cc1)C	54	4.19	4.26761	0.0776062	6.03261	20	0.30163
CHEMBL121522	S(=O)(=O)(N(CCCO)c1n(ncc1)-c1ccccc1)c1ccc(cc1)-c1cc([N+](=O)[O-])ccc1	28	4.48	4.55284	0.072842	6.43581	34	0.189289
CHEMBL2070137	S(=O)(=O)(CC)c1cc2nc([nH]c2cc1)-c1cc(ccc1)-c1ccccc1	9.9	4.94	5.00436	0.0643648	7.07408	26	0.27208
CHEMBL2070146	S(=O)(=O)(CC)c1cc2nc([nH]c2cc1)-c1cccc(-c2ccccc2)c1F	7.2	5.09	5.14267	0.0526675	7.26958	27	0.269244
CHEMBL8332	S(=O)(=O)(N1CC(N(c2c(C1)cccc2)Cc1nc[nH]c1)CCc1ccccc1)c1ccc(cc1)C(C)(C)C	0.038	7.37	7.42022	0.0502164	10.4891	38	0.276028
CHEMBL2018920	Brc1ccc(cc1)CSc1[nH]c2c(n1)cc(OC)cc2	3.25	5.44	5.48812	0.0481166	7.7579	20	0.387895
CHEMBL397230	S(=O)(C)c1ccc(-n2nc(cc2-c2ccc(cc2)C)C(F)(F)F)cc1	26	4.54	4.58503	0.0450267	6.48131	25	0.259252
CHEMBL1480	Clc1c(cccc1Cl)C1C(C(OCC)=O)=C(NC(C)=C1C(OC)=O)C	4.5795	5.3	5.33918	0.0391819	7.54737	25	0.301895
CHEMBL1090188	o1c(nc(COc2cc(ccc2)CN(CC(O)=O)C(Oc2ccc(cc2)C)=O)c1C)-c1ccc(cc1)C#N	21	4.64	4.67778	0.0377807	6.61242	38	0.174011
CHEMBL498114	O=C1N(C=CC=C1)C=1C=C(c2n(C=1)c(C)c(n2)C)CCc1c(cccc1C)C	4.2	5.34	5.37675	0.0367507	7.60047	28	0.271446
CHEMBL1224194	FC(F)(F)c1cc(ccc1-c1cc(-n2nc(cc2C)C(=O)N)ccc1)C(F)(F)F	9	5.01	5.04576	0.0357575	7.13259	29	0.245951
CHEMBL2070153	S(=O)(=O)(CC)c1cc2nc([nH]c2cc1)-c1cc(ccc1C)-c1ccccc1	6.8	5.14	5.16749	0.0274911	7.30467	27	0.270543
CHEMBL1089210	Clc1ccc(cc1)-c1oc(C)c(n1)COc1cc(ccc1)CN(CC(O)=O)C(Oc1ccc(cc1)C)=O	1.2	5.9	5.92082	0.0208188	8.36956	37	0.226204
CHEMBL2152524	N1(CCCC1)[C@H]([C@@H](N1CCCC1)c1ccccc1)c1ccccc1	19.9526	4.68	4.7	0.0200001	6.64383	24	0.276826
CHEMBL2152525	N1(CCCC1)[C@@H]([C@H](N1CCCC1)c1ccccc1)c1ccccc1	19.9526	4.68	4.7	0.0200001	6.64383	24	0.276826
CHEMBL121040	S(=O)(=O)(N(CCC)c1n(ncc1)-c1ccccc1)c1ccc(cc1)C	20	4.68	4.69897	0.01897	6.64238	25	0.265695
CHEMBL2403317	Fc1cc(F)cc(F)c1CN1c2c(cc(Oc3nccc(OC)c3C(F)(F)F)cc2)C(=O)N=C1	11	4.94	4.95861	0.0186073	7.0094	34	0.206159
CHEMBL2018909	S(CC(C)C)c1[nH]c2c(n1)cc(OC)cc2	32.7	4.47	4.48545	0.0154522	6.34055	16	0.396284
CHEMBL285831	S(=O)(=O)(N)c1ccc(-n2nc(cc2-c2ccc(cc2)C(F)(F)F)C(F)(F)F)cc1	17	4.76	4.76955	0.00955108	6.74215	29	0.232488
CHEMBL376487	s1cc(nc1)[C@@H](NC(=O)c1cc2nc(n(c2cc1)C1CCCCC1)-c1ccoc1)Cc1c2cc(O)ccc2[nH]c1	2.3	5.63	5.63827	0.00827216	7.97016	40	0.199254
CHEMBL1076536	O(Cc1c(cccc1C)C)C=1c2n(C=CC=1)c(C)c(n2)C	16	4.79	4.79588	0.00588002	6.77937	21	0.322827
CHEMBL513400	OC(=O)[C@@H](NC(=O)c1cc2c(cc1NC(=O)Nc1c(cc(cc1C)C)C)cccc2)C1CCCC1	1.2	5.92	5.92082	0.000818754	8.36956	35	0.23913
CHEMBL1917418	Clc1ccc(Sc2c3cc(ccc3n(CC(O)=O)c2C)C)cc1	0.8	6.11	6.09691	-0.01309	8.61848	23	0.374716
CHEMBL2018922	S(Cc1ccc(cc1)C(O)=O)c1[nH]c2c(n1)cc(OC)cc2	50	4.32	4.30103	-0.01897	6.07986	22	0.276357
CHEMBL3236948	Fc1cc2c(n(CC(O)=O)c(C)c2C=2c3c(cccc3)C(=O)N(C=2)C(C)C)cc1	55	4.28	4.25964	-0.0203627	6.02134	29	0.207633
CHEMBL2205045	Cl.S(c1ccccc1N1CCNCC1)c1ccc(cc1)C	40	4.42	4.39794	-0.02206	6.21685	21	0.29604
CHEMBL1208961	s1c(C(=O)N)c(O[C@@H](C)c2ccccc2C(F)(F)F)cc1-n1c2c(nc1)cc(cc2)-c1cc(ncc1)NCCN(C)C	0.9	6.07	6.04576	-0.0242425	8.54617	42	0.20348
CHEMBL595223	S(=O)(=O)(c1ccc(OC(F)(F)F)cc1S(=O)(=O)N1CCC2(CC2NS(=O)(=O)C(F)(F)F)CC1)c1ncccc1	30	4.55	4.52288	-0.0271213	6.39346	39	0.163935
CHEMBL1255837	S(O)(=O)(=O)C.O1[C@](NC(=O)[C@@H]2C[C@H]3[C@H](N(C2)C)Cc2c4c3cccc4[nH]c2)(C(C)C)C(=O)N2[C@@H](Cc3ccccc3)C(=O)N3[C@@H](CCC3)[C@]12O	3	5.56	5.52288	-0.0371213	7.80704	50	0.156141
CHEMBL1209538	Clc1cc(Cl)ccc1C=1n2nc(cc2N=C(C)C=1CN)-c1ccccc1	12	4.96	4.92082	-0.0391812	6.95598	26	0.267538
CHEMBL475764	OC(=O)[C@@H](NC(=O)c1cc2c(cc1NC(=O)Nc1c(cc(cc1C)C)C)cccc2)C(C)(C)C	2.3	5.68	5.63827	-0.0417278	7.97016	34	0.234416
CHEMBL3289803	Clc1cc(ccc1C(O)Cn1c2cc(ccc2nc1N)C(F)(F)F)C(F)(F)F	27.9	4.6	4.5544	-0.0456042	6.43801	28	0.229929
CHEMBL2069316	S(=O)(=O)(CC)c1cc2nc([nH]c2cc1)-c1cc(-c2ccccc2)c(cc1)C	8.3	5.14	5.08092	-0.0590781	7.1823	27	0.266011
CHEMBL377414	Fc1cc(F)ccc1[C@@H](N1[C@@H](CC(C)C)C(=O)N[C@H](C2Cc3c(C2)cccc3)C1=O)C(=O)N(C)C	12	4.98	4.92082	-0.0591812	6.95598	35	0.198742
CHEMBL1824248	O(CCCN1CCCCC1)c1ccc(cc1)C1CCC(NCCCC)CC1	1	6.06	6	-0.06	8.48149	27	0.314129
CHEMBL1824249	O(CCCN1CCCCC1)c1ccc(cc1)C1CCC(NCCCC)CC1	1	6.06	6	-0.06	8.48149	27	0.314129
CHEMBL1824230	O(CCCN1CCCCC1)c1ccc(cc1)C1CCC(N(C)C)CC1	11.3	5.01	4.94692	-0.0630784	6.99288	25	0.279715
CHEMBL3215864	Cl.Cl.O1CCOc2c1cc(-n1c(C)c(nc1C)C(=O)NCCCN1CCN(CC1)c1cccc(C)c1C)cc2	4.4	5.42	5.35655	-0.0634527	7.57192	39	0.194152
CHEMBL2018919	Clc1ccc(cc1)CSc1[nH]c2c(n1)cc(OC)cc2	5.98	5.29	5.2233	-0.0667012	7.38356	20	0.369178
CHEMBL2070148	S(=O)(=O)(CC)c1cc2nc([nH]c2cc1)-c1cc(-c2ccccc2)c(F)cc1	9.5	5.09	5.02228	-0.0677236	7.0994	27	0.262941
CHEMBL479628	Clc1ccc(Cl)cc1Nc1ncc(C(=O)NCC2CCOCC2)c(c1)C1CC1	27	4.64	4.56864	-0.0713638	6.45814	28	0.230648
CHEMBL1170878	Cl.O(c1ccc(cc1)CN1CCC2(N(CCCC)C(=O)[C@@H](NC2=O)CC2CCCCC2)CC1)c1ccc(cc1)C(O)=O	8.8	5.13	5.05552	-0.0744827	7.14639	42	0.170152
CHEMBL2018904	S(CCCCC)c1[nH]c2c(n1)cc(OC)cc2	9.18	5.12	5.03716	-0.0828427	7.12043	17	0.418849
CHEMBL473850	O([C@@H]([C@H](NC(=O)c1cc2c(cc1NC(=O)Nc1c(cc(cc1C)C)C)cccc2)C(O)=O)C)C(C)C	14	4.94	4.85387	-0.086128	6.86134	36	0.190593
CHEMBL496935	Oc1c(cc(cc1C)\C=C/1\CC\C(=C/c2cc(C)c(O)c(c2)C)\C\1=O)C	28.3	4.64	4.54821	-0.0917864	6.42927	26	0.24728
CHEMBL330354	Fc1cc(F)cc(F)c1CN1c2c(cccc2)[C@](NCC1=O)([C@H](Oc1nc(cc(n1)C)C)C(O)=O)c1cc(ccc1)CCCC	15	4.92	4.82391	-0.0960913	6.81899	45	0.151533
CHEMBL475766	OC(=O)[C@@H](NC(=O)c1cc2c(cc1NC(=O)Nc1c(cc(cc1C)C)C)cccc2)[C@H](CC)C	1.94	5.81	5.7122	-0.0978017	8.07466	34	0.23749
CHEMBL3289813	Clc1cc(ccc1C(O)Cn1c2nc(OC(C(F)(F)F)C)ccc2nc1N)C(F)(F)F	22.9	4.74	4.64016	-0.0998355	6.55925	31	0.211589
CHEMBL589625	Clc1cc(N(Cc2cc(Cl)ccc2Cl)[C@H]2CCN(C2)C(=O)CC)ccc1C#N	2.9	5.64	5.5376	-0.102398	7.82785	28	0.279566
CHEMBL502335	S(Cc1cc2c(cc1)cccc2)c1[nH]c2cc(OC)ccc2n1	2.27	5.75	5.64397	-0.106026	7.97822	23	0.346879
CHEMBL17201	O=C(\C=C\c1ccccc1)\C=C\c1ccccc1	67.3	4.28	4.17199	-0.108015	5.89744	18	0.327636
CHEMBL196946	s1cc(c2c1cccc2)-c1ccc(cc1F)C1(CC1)C(O)=O	19	4.83	4.72125	-0.108754	6.67387	22	0.303358
CHEMBL2018907	S(CCCCCC)c1[nH]c2c(n1)cc(OC)cc2	2.92	5.65	5.53462	-0.115383	7.82363	18	0.434646
CHEMBL1241737	O1c2c(-n3c(C1)c(nc3)/C(=N/OC)/C)cccc2CCN1CCN(CC1)c1c2c(nc(cc2)C)ccc1	4	5.53	5.39794	-0.13206	7.63043	37	0.206228
CHEMBL444032	O([C@@H]([C@H](NC(=O)c1cc2c(cc1NC(=O)Nc1c(cc(cc1C)C)C)cccc2)C(O)=O)CC(C)C)Cc1ccccc1	0.05	7.44	7.30103	-0.13897	10.3206	43	0.240014
CHEMBL2070151	Clc1ccc(cc1-c1ccccc1)-c1[nH]c2c(n1)cc(S(=O)(=O)CC)cc2	5.4	5.41	5.26761	-0.142394	7.44619	27	0.275785
CHEMBL414238	S(=O)(=O)(N(CCC(C)C)c1n(ncc1)-c1ccccc1)c1ccc(N)cc1	60	4.38	4.22185	-0.158151	5.96793	27	0.221034
CHEMBL3298837	ClC=1C=Cn2c(nc(CC)c2C(=O)NCc2ccc(N3CCN(CC3)c3ccc(OC(F)(F)F)cc3)cc2)C=1	0.17	6.93	6.76955	-0.160449	9.56931	39	0.245367
CHEMBL496400	O=C1N(CCCC1)C=1C=C(NCc2c(cccc2C)C)c2n(C=1)c(C)c(n2)C	14	5.02	4.85387	-0.166128	6.86134	28	0.245048
CHEMBL519680	Fc1ccc(cc1)C1N=C(NC(C)=C1C(=O)Nc1cc2c([nH]nc2)cc1)c1ccccc1	0.64	6.36	6.19382	-0.16618	8.75547	32	0.273608
CHEMBL319754	Fc1cc(F)cc(F)c1CN1c2c(cccc2)[C@@](NCC1=O)([C@H](Oc1nc(cc(n1)C)C)C(O)=O)c1cc(ccc1)-c1ccccc1	28	4.72	4.55284	-0.167158	6.43581	47	0.136932
CHEMBL226067	Clc1cc(Nc2nc(C(F)(F)F)c(cn2)C(=O)NCC2CCCCC2)ccc1	9	5.22	5.04576	-0.174243	7.13259	28	0.254735
CHEMBL2205043	Cl.Clc1ccc(Sc2ccccc2N2CCNCC2)cc1	31	4.69	4.50864	-0.181362	6.37333	21	0.303492
CHEMBL1099326	O(CCCC(O)=O)c1cccc(CCCCCCOc2cc(cc(c2)-c2ccncc2)-c2ccncc2)c1CCC(O)=O	0.34	6.65	6.46852	-0.181479	9.14378	43	0.212646
CHEMBL2018910	S(CC(C)(C)C)c1[nH]c2c(n1)cc(OC)cc2	21.2	4.86	4.67366	-0.186336	6.6066	17	0.388624
CHEMBL2413882	Clc1cc2nccc(Nc3cc(ccc3)C(N3CCCC3)c3nnnn3C(C)(C)C)c2cc1	3.14	5.69	5.50307	-0.18693	7.77904	33	0.235728
CHEMBL408	S1C(Cc2ccc(OCC3(Oc4c(CC3)c(C)c(O)c(C)c4C)C)cc2)C(=O)NC1=O	4	5.59	5.39794	-0.19206	7.63043	31	0.246143
CHEMBL2018903	S(CCCC)c1[nH]c2c(n1)cc(OC)cc2	39.9	4.6	4.39903	-0.200973	6.21838	16	0.388649
CHEMBL1090877	o1c(nc(COc2cc(ccc2)CN(CC(O)=O)C(Oc2ccc(cc2)C)=O)c1C)-c1ccc(cc1)C	3.5	5.66	5.45593	-0.204068	7.7124	37	0.208443
CHEMBL208787	o1c2c(cc(cc2)[C@@H](N2[C@@H](CC(C)C)C(=O)N[C@H](C3Cc4c(C3)cccc4)C2=O)C(=O)NC(C)C)cc1	3.5	5.66	5.45593	-0.204068	7.7124	37	0.208443
CHEMBL2018926	S(Cc1ccc(OCc2ccccc2)cc1)c1[nH]c2c(n1)cc(OC)cc2	0.88	6.26	6.05552	-0.204483	8.55997	27	0.317036
CHEMBL516081	OC(=O)[C@@H](NC(=O)c1cc2c(cc1NC(=O)Nc1c(cc(cc1C)C)C)cccc2)CCC(C)C	0.74	6.34	6.13077	-0.209232	8.66634	35	0.24761
CHEMBL481659	BrC=1C(=O)C2(CCCCC2)C=1N[C@@H](Cc1ccc(-n2c3ncccc3nc2-c2cccnc2)cc1)C(O)=O	10	5.21	5	-0.21	7.06791	38	0.185998
CHEMBL560740	Fc1ccc(cc1)C(CCNC(=O)c1ccc(OCC(F)(F)F)nc1)c1ccc(F)cc1	2	5.91	5.69897	-0.21103	8.05596	32	0.251749
CHEMBL1208964	Clc1ccccc1[C@@H](Oc1cc(sc1C(=O)N)-n1c2c(nc1)cc(cc2)-c1cc(ncc1)NC1CCN(CC1)C)C	4.3	5.58	5.36653	-0.213468	7.58603	41	0.185025
CHEMBL235882	Fc1cc(C)c(cc1)[C@H]1CN(C[C@@H]1C(=O)N(Cc1cc(cc(c1)C(F)(F)F)C(F)(F)F)C)C(=O)c1ncc(nc1)C	43	4.58	4.36653	-0.213468	6.17245	41	0.150548
CHEMBL1091980	Clc1ccccc1-c1oc(C)c(n1)COc1cc(ccc1)CN(CC(O)=O)C(Oc1ccc(cc1)C)=O	3.7	5.65	5.4318	-0.218202	7.67829	37	0.207521
CHEMBL2347328	FC(F)(F)c1ccc(cc1)-c1ccc(cc1)-c1[nH]c(nc1)[C@H]1N(CCC1)C(=O)[C@@H](NC(OC)=O)C(C)C	9.1	5.26	5.04096	-0.219041	7.12581	37	0.192589
CHEMBL1916559	FC(F)(F)c1cc(cc(c1)C(F)(F)F)-c1onc(n1)-c1cc2CCN(c2cc1)C(=O)CCC(O)=O	34.8	4.68	4.45842	-0.221579	6.30234	35	0.180067
CHEMBL460291	O(C(=O)C=1C(C(C(OCC)=O)=C(NC=1C)C)c1ccccc1\C=C\C(OC(C)(C)C)=O)CC	2	5.93	5.69897	-0.23103	8.05596	33	0.24412
CHEMBL498434	O(Cc1c(cccc1C)C)C1=CC(N2C=CC=CC2=O)=Cn2c1nc(C)c2C	21	4.91	4.67778	-0.232219	6.61242	28	0.236158
CHEMBL1235	Clc1cc2nccc(Nc3cc(CNCC)c(O)cc3)c2cc1	58	4.47	4.23657	-0.233428	5.98874	23	0.26038
CHEMBL3298836	ClC=1C=Cc2n(C=1)c(C(=O)NCc1ccc(N3CCN(CC3)c3ccc(F)cc3)cc1)c(n2)CC	1.33	6.11	5.87615	-0.233852	8.30641	35	0.237326
CHEMBL605932	Clc1cc(S(=O)(=O)c2ccccc2F)c(S(=O)(=O)N2CCC(CC2)(C(C)C)CNS(=O)(=O)C(F)(F)F)cc1	2	5.94	5.69897	-0.24103	8.05596	38	0.211999
CHEMBL2376577	S(=O)(=O)(Nc1ccc(Oc2ccccc2)cc1C(O)=O)c1ccc(cc1)C	3	5.77	5.52288	-0.247121	7.80704	27	0.28915
CHEMBL601472	Clc1cc(N(Cc2cc(F)ccc2C)[C@H]2CCN(C2)C(OCC)=O)ccc1C#N	1.5	6.08	5.82391	-0.256091	8.23257	29	0.283882
CHEMBL475217	O([C@@H]([C@H](NC(=O)c1cc2c(cc1NC(=O)Nc1c(cc(cc1C)C)C)cccc2)C(O)=O)C)Cc1ccccc1	1.9	5.98	5.72125	-0.258754	8.08745	40	0.202186
CHEMBL2070150	Clc1ccc(cc1-c1[nH]c2c(n1)cc(S(=O)(=O)CC)cc2)-c1ccccc1	7.1	5.41	5.14874	-0.261258	7.27817	27	0.269562
CHEMBL2376562	S(=O)(=O)(Nc1cc(Oc2ccccc2)ccc1C(O)=O)c1ccc(cc1)C	3.1	5.77	5.50864	-0.261362	7.78691	27	0.288404
CHEMBL3114713	s1cncc1COC(=O)N[C@@H](Cc1ccccc1)CC[C@@H](NC(=O)[C@@H](NC(=O)N(Cc1nc(sc1)C(C)C)C)C(C)C)Cc1ccccc1	6.8	5.43	5.16749	-0.262509	7.30467	49	0.149075
CHEMBL557885	FC(F)(F)c1ccccc1Cn1c2c(nc1Nc1ccc(OC)cc1)cc(cc2)C(=O)N	8	5.36	5.09691	-0.26309	7.2049	32	0.225153
CHEMBL1089164	Fc1ccc(cc1)-c1oc(C)c(n1)COc1cc(ccc1)CN(CC(O)=O)C(Oc1ccc(cc1)C)=O	8.6	5.33	5.0655	-0.264498	7.1605	37	0.193527
CHEMBL472140	OC(=O)[C@@H](NC(=O)c1cc2c(cc1NC(=O)Nc1c(cc(cc1C)C)C)cccc2)C1CCCCC1	0.61	6.48	6.21467	-0.26533	8.78494	36	0.244026
CHEMBL517646	Clc1cc(Cl)ccc1Nc1ncc(C(=O)NCC2CCOCC2)c(c1)C1CC1	43	4.64	4.36653	-0.273468	6.17245	28	0.220445
CHEMBL2387600	Clc1ccccc1-c1[nH]c-2c(n1)C(=O)Nc1cc(ccc1-2)Cc1ccccc1	5.2	5.56	5.284	-0.276003	7.46936	28	0.266763
CHEMBL1403281	O1[C@](NC(=O)[C@@H]2C=C3[C@H](N(C2)C)Cc2c4c3cccc4[nH]c2)(C(C)C)C(=O)N2[C@@H](CC(C)C)C(=O)N3[C@@H](CCC3)[C@]12O	6	5.5	5.22185	-0.278151	7.38151	42	0.17575
CHEMBL3099819	Clc1cc2nccc(NCCNC(c3ccc(cc3)C)c3nnnn3C(C)(C)C)c2cc1	10.3	5.27	4.98716	-0.282837	7.04976	32	0.220305
CHEMBL512414	Clc1ccccc1C(N1C2CC(CC1CC2)(C(=O)N)c1ccccc1)c1ccccc1Cl	8	5.38	5.09691	-0.28309	7.2049	32	0.225153
CHEMBL496426	o1cccc1C=1C=C(NCc2c(cccc2C)C)c2n(C=1)c(C)c(n2)C	3.2	5.78	5.49485	-0.28515	7.76742	26	0.298747
CHEMBL207293	Clc1cc(-c2n(cnc2)-c2cc(ccc2)C(O)=O)c(OCc2ccccc2)cc1	1.9	6.01	5.72125	-0.288754	8.08745	29	0.278878
CHEMBL2179319	FC(F)(F)C=1c2n(C=CC=1N1CCC(CC1)c1ccccc1)c(nn2)CC1CC1	11	5.25	4.95861	-0.291393	7.0094	29	0.241703
CHEMBL209244	Clc1cc(-c2cnccc2-c2cc(ccc2)C(O)=O)c(OCc2ccccc2)cc1	4.3	5.66	5.36653	-0.293468	7.58603	30	0.252868
CHEMBL444533	FC(F)(F)CNC(=O)[C@H]1N(CCN(C1)Cc1oc(cc1)-c1ccccc1)C[C@@H](O)C[C@@H](Cc1cccnc1)C(=O)N[C@H]1c2c(OC[C@H]1O)cccc2	83.9	4.37	4.07624	-0.293762	5.76209	52	0.11081
CHEMBL453311	Clc1cccc(C)c1NC(=O)Nc1cc2c(cc1C(=O)N[C@@H](C(O)=O)C1CCCCC1)cccc2	1	6.3	6	-0.3	8.48149	35	0.242328
CHEMBL2018912	S(CC1CCCCC1)c1[nH]c2c(n1)cc(OC)cc2	4.41	5.66	5.35556	-0.304439	7.57052	19	0.398449
CHEMBL24944	Brc1cc(Br)cc(C(=O)Nc2ccc(Br)cc2)c1O	2	6.01	5.69897	-0.31103	8.05596	19	0.423998
CHEMBL390002	Clc1cc(ccc1)C(O)CNC=1C=CNC(=O)C=1c1[nH]c2c(n1)c(cc(c2)C1=NC(CN1)C)C	67	4.49	4.17393	-0.316075	5.90018	34	0.173535
CHEMBL1170483	Fc1c(cccc1F)CCC1=NC(=O)c2c(N1CC(=O)N(Cc1ccc(cc1)-c1ccc(cc1)C(F)(F)F)C1CCN(CC1)c1ncncc1)cccc2	0.07943	7.42	7.10002	-0.319985	10.0364	54	0.18586
CHEMBL2070147	S(=O)(=O)(CC)c1cc2nc([nH]c2cc1)-c1cc(ccc1F)-c1ccccc1	17	5.09	4.76955	-0.320449	6.74215	27	0.249709
CHEMBL475833	O(CC(C)(C)C)C[C@@H](NC(=O)c1cc2c(cc1NC(=O)Nc1c(cc(cc1C)C)C)cccc2)C(O)=O	4.7	5.65	5.3279	-0.322098	7.53142	37	0.203552
CHEMBL1079436	O1CC(=O)N(CC1)c1nc(NCc2c(cccc2C)C)c2[nH]c(C)c(c2c1)C	61	4.54	4.21467	-0.32533	5.95778	28	0.212778
CHEMBL475378	O([C@@H]([C@H](NC(=O)c1cc2c(cc1NC(=O)Nc1c(cc(cc1C)C)C)cccc2)C(O)=O)CC)Cc1ccccc1	0.68	6.51	6.16749	-0.342509	8.71825	41	0.21264
CHEMBL475765	OC(=O)[C@@H](NC(=O)c1cc2c(cc1NC(=O)Nc1c(cc(cc1C)C)C)cccc2)CCC	8.4	5.42	5.07572	-0.344279	7.17494	33	0.217423
CHEMBL2022997	NCCCC(c1cc(ccc1)C)(c1ccccc1)c1ccccc1	4.3	5.72	5.36653	-0.353468	7.58603	24	0.316085
CHEMBL246599	O1CC(=O)N(c2cc(ccc12)CN1CCN(CC1)CCOc1c2c(nc(cc2)C)ccc1)CCC	18	5.1	4.74473	-0.355272	6.70706	35	0.19163
CHEMBL1080717	n12c(cc(C)c1C)C(=NC=C2)NCc1c(cccc1C)C	14	5.21	4.85387	-0.356128	6.86134	21	0.326731
CHEMBL445734	Fc1c(cc(NCC)cc1N1CCCC1=O)C(=O)N[C@@H]([C@H](O)CNCc1cc(ccc1)C(F)(F)F)Cc1ccccc1	60	4.58	4.22185	-0.358151	5.96793	42	0.142093
CHEMBL1824247	O(CCCN1CCCCC1)c1ccc(cc1)C1CCC(NCc2ccccc2)CC1	1	6.36	6	-0.36	8.48149	30	0.282716
CHEMBL248380	Fc1cc2c(nc(-c3ccc(cc3)-c3ccccc3OCC)c(C#N)c2N[C@@H](C(O)=O)C)cc1	2	6.06	5.69897	-0.36103	8.05596	34	0.23694
CHEMBL246160	Clc1ccccc1CNc1nc(NCC2CCC(CC2)CN(C)C)c([N+](=O)[O-])cn1	8.4	5.44	5.07572	-0.364279	7.17494	30	0.239165
CHEMBL480765	OC(=O)[C@@H](NC(=O)c1cc2c(cc1NC(=O)Nc1c(cc(cc1C)C)C)cccc2)C(C)C	12	5.29	4.92082	-0.369181	6.95598	33	0.210787
CHEMBL595481	Clc1cc(S(=O)(=O)c2ccccc2F)c(S(=O)(=O)N2CCC(CC2)(CCC)CNS(=O)(=O)C(F)(F)F)cc1	2	6.07	5.69897	-0.37103	8.05596	38	0.211999
CHEMBL2018923	S(Cc1cc(ccc1)-c1ccccc1)c1[nH]c2c(n1)cc(OC)cc2	0.82	6.46	6.08619	-0.373814	8.60332	25	0.344133
CHEMBL253082	S(=O)(=O)(C(C)(C)c1cc(c2ncccc2c1)-c1cc(ccc1)-c1ccc(cc1)C(CC(O)=O)(C)C)C	15	5.2	4.82391	-0.376091	6.81899	36	0.189416
CHEMBL2402572	FC(F)(F)c1cc(cc(c1)[C@H](O[C@H]1CC[C@H]2[C@@H](CN(C2)C=2OCC(=O)N=2)[C@@H]1c1ccccc1C)CO)C(F)(F)F	41	4.77	4.38722	-0.382784	6.20169	40	0.155042
CHEMBL572324	Clc1c(Oc2cc(cc(Cl)c2)C#N)cc(OCc2n[nH]c3nc(N)ccc23)cc1F	10.3	5.37	4.98716	-0.382837	7.04976	30	0.234992
CHEMBL593823	Clc1cc(S(=O)(=O)c2ccccc2F)c(S(=O)(=O)N2CCC(CC2)(CNC(OCC=C)=O)CNS(=O)(=O)C(F)(F)F)cc1	13	5.27	4.88606	-0.383943	6.90684	43	0.160624
CHEMBL475639	OC(=O)[C@@H](NC(=O)c1cc2c(cc1NC(=O)Nc1c(cc(cc1C)C)C)cccc2)CCC(C)(C)C	0.45	6.74	6.34679	-0.393213	8.9717	36	0.249214
CHEMBL348475	O(C)c1cc(C(=O)Nc2ccc(cc2)CCN2CCc3cc(OC)c(OC)cc3C2)c(NC(=O)c2cc3c(nc2)cccc3)cc1OC	7.1	5.55	5.14874	-0.401258	7.27817	48	0.151628
CHEMBL2205054	Cl.S(c1ccccc1N1CCNCC1)c1cc(C)c(cc1)C	34	4.87	4.46852	-0.401479	6.31662	22	0.287119
CHEMBL1922662	S(C(C)(C)C)c1c2cc(OCc3ncc(cc3)C)ccc2n(Cc2ccc(cc2)-c2ncc(cc2)C)c1CC(C(O)=O)(C)C	0.012	8.33	7.92082	-0.409181	11.1967	44	0.254471
CHEMBL2018921	Ic1ccc(cc1)CSc1[nH]c2c(n1)cc(OC)cc2	5.15	5.7	5.28819	-0.411807	7.47529	20	0.373765
CHEMBL482147	OC(=O)[C@@H](NC(=O)c1cc2c(cc1NC(=O)Nc1c(cc(cc1C)C)C)cccc2)CCCC	3	5.94	5.52288	-0.417121	7.80704	34	0.229619
CHEMBL3298835	ClC=1C=Cn2c(nc(CC)c2C(=O)NCc2ccc(N3CCC(CC3)c3ccc(F)cc3)cc2)C=1	0.5	6.73	6.30103	-0.42897	8.90702	35	0.254486
CHEMBL2414256	Clc1ccc(cc1)C(NCCNc1c2c(ncc1)cc(Cl)cc2)c1nnnn1C(C)(C)C	8.91	5.48	5.05012	-0.429878	7.13876	32	0.223086
CHEMBL1170958	Fc1cc(ccc1)[C@H](NC(=O)c1c2c(nc(-c3ccccc3)c1Cc1cncnc1)cccc2)C1CC1	10	5.43	5	-0.43	7.06791	37	0.191025
CHEMBL2387595	Clc1ccccc1-c1[nH]c-2c(n1)C(=O)Nc1cc(ccc1-2)CCC	24	5.05	4.61979	-0.430211	6.53045	24	0.272102
CHEMBL601055	Clc1cc(N(Cc2cc(F)ccc2C)[C@H]2CCN(C2)C(OC(C)C)=O)ccc1C#N	1.1	6.39	5.95861	-0.431393	8.42298	30	0.280766
CHEMBL1090211	Clc1ccc(cc1)-c1oc(COc2cc(ccc2)CN(CC(O)=O)C(Oc2ccc(cc2)C)=O)c(n1)C	3.4	5.9	5.46852	-0.431479	7.7302	37	0.208924
CHEMBL347303	O(CCCC)c1ccc(cc1)-c1[nH][n+](cc1)C	19.2	5.15	4.7167	-0.433301	6.66744	17	0.392202
CHEMBL2387502	Clc1cccc([N+](=O)[O-])c1-c1[nH]c-2c(n1)C(=O)Nc1cc(ccc1-2)-c1ccccc1	20	5.14	4.69897	-0.44103	6.64238	30	0.221413
CHEMBL194425	Clc1cc2-c3c(CC(Oc2cc1)=O)c(O)nc1c3cc(cc1)C(F)(F)F	12.45	5.35	4.90483	-0.445169	6.93338	26	0.266668
CHEMBL411118	o1c(nc(CCOc2ccc(cc2)C[C@H]2[C@H](N(C2=O)c2ccc(OC)cc2)C(O)=O)c1C)-c1ccccc1	14	5.3	4.85387	-0.446128	6.86134	38	0.180562
CHEMBL1270215	O(C(=O)N1C[C@H](NC(OC(C)(C)C)=O)CC1)C1C2CC3CC1CC(C2)C3	11.4	5.39	4.9431	-0.446905	6.98747	26	0.268749
CHEMBL2070140	S(=O)(=O)(CCC)c1cc2nc([nH]c2cc1)-c1cc(ccc1)-c1ccccc1	9.5	5.47	5.02228	-0.447724	7.0994	27	0.262941
CHEMBL521347	Clc1cc(F)c(cc1)C1N=C(NC(C)=C1C(=O)Nc1cc2c([nH]nc2)cc1F)c1cc(Cl)ncc1	2.5	6.05	5.60206	-0.44794	7.91897	35	0.226256
CHEMBL1650523	FC(F)(F)c1ccccc1-c1cc(c2[nH]c(nc2c1)C1=NOC2(C1)CCCCC2)C#N	1.9	6.17	5.72125	-0.448754	8.08745	31	0.260885
CHEMBL3127163	s1cc(nc1-n1nc(c2c1cc(cc2)C(F)(F)F)-c1ccccc1)C(O)=O	7.86	5.56	5.10458	-0.455423	7.21574	27	0.267249
CHEMBL1076210	[nH]1c2c(ccnc2NCc2c(cccc2C)C)c(C)c1C	33	4.94	4.48149	-0.458514	6.33495	21	0.301664
CHEMBL481887	OC(=O)C1(NC(=O)c2cc3c(cc2NC(=O)Nc2c(cc(cc2C)C)C)cccc3)Cc2c(C1)cccc2	4.877	5.78	5.31185	-0.468153	7.50873	38	0.197598
CHEMBL2204357	Cl.S(c1cccc(C)c1C)c1ccccc1N1CCNCC1	40	4.87	4.39794	-0.47206	6.21685	22	0.282584
CHEMBL231334	S(=O)(=O)(Nc1cc2CCN(CCc2cc1)C)c1ccc(cc1)CCCC	47	4.8	4.3279	-0.472098	6.11784	26	0.235302
CHEMBL1076192	n1ccc2n(C)c(cc2c1NCc1c(cccc1C)C)C	66	4.66	4.18046	-0.479544	5.90941	21	0.281401
CHEMBL240436	Clc1ccc(cc1)CNC(=O)CN(S(=O)(=O)c1ccc(cc1)C)c1ccccc1CC	6.30957	5.68	5.2	-0.48	7.35062	31	0.237117
CHEMBL586213	FC(F)(F)c1cc2N(CCc2cc1OC)C(=O)Nc1cc(cc(OC(F)(F)F)c1)-c1cccnc1	2	6.18	5.69897	-0.48103	8.05596	35	0.23017
CHEMBL596356	S(=O)(=O)(c1ccccc1F)c1ccc(OC(F)(F)F)cc1S(=O)(=O)N1CCC2(CC2NS(=O)(=O)C(F)(F)F)CC1	30	5.01	4.52288	-0.487121	6.39346	40	0.159836
CHEMBL2023898	O(C(=O)N[C@@H](C(C)C)C(=O)N1CCC[C@H]1c1[nH]c(cn1)-c1ccc(cc1)-c1ccc(cc1)-c1[nH]c(nc1)[C@H]1N(CCC1)C(=O)[C@@H](NC(OC)=O)C(C)C)C	59.5	4.72	4.22548	-0.494517	5.97306	54	0.110612
CHEMBL2413881	Clc1cc2nccc(Nc3cc(ccc3)C(N(CC)CC)c3nnnn3C(C)(C)C)c2cc1	2.43	6.12	5.61439	-0.505606	7.9364	33	0.240497
CHEMBL2204360	Cl.S(c1ccc(cc1C)C)c1ccccc1N1CCNCC1	39	4.92	4.40894	-0.511065	6.23239	22	0.28329
CHEMBL2018571	Fc1ccc(cc1)C[C@@H]1C[C@H](N(C1)C(=O)Cn1nncc1)C(=O)Nc1ccc(Oc2ccc(F)cc2)cc1	17.253	5.29	4.76314	-0.526865	6.73308	38	0.177186
CHEMBL590593	Clc1cc(N(Cc2cc(Cl)ccc2Cl)[C@H]2CCN(C2)C(=O)[C@@H](O)C)ccc1C#N	7.9	5.63	5.10237	-0.527627	7.21262	29	0.248711
CHEMBL1287846	O(C)c1c2n(cc(c2ccc1)C(=O)N1CCN2[C@@H](CCCC2)C1)CC1CCCCC1	12	5.45	4.92082	-0.529181	6.95598	30	0.231866
CHEMBL1208965	Clc1ccccc1[C@@H](Oc1cc(sc1C(=O)N)-n1c2c(nc1)cc(cc2)-c1ccc(nc1)NC1CCN(CC1)C)C	8.9	5.58	5.05061	-0.52939	7.13945	41	0.174133
CHEMBL230043	Clc1cc(ccc1)C(O)CNC=1C=CNC(=O)C=1c1[nH]c2c(n1)c(cc(c2)C=1NCCCN=1)C	100	4.53	4	-0.53	5.65433	34	0.166304
CHEMBL1171896	n1c2c(ccc1C)c(N1CCN(CC1)CCc1ccccc1)ccc2	39.8107	4.93	4.4	-0.53	6.21976	25	0.24879
CHEMBL2375371	Brc1cc(F)c(S(=O)(=O)Nc2ccc(Oc3ccccc3)cc2C(O)=O)cc1	1.1	6.49	5.95861	-0.531393	8.42298	28	0.300821
CHEMBL487438	BrC=1C(=O)C2(CCCCC2)C=1N[C@@H](Cc1ccc(-n2c3ncccc3nc2C2(CC2)C(F)(F)F)cc1)C(O)=O	8	5.63	5.09691	-0.53309	7.2049	39	0.184741
CHEMBL2018917	S(Cc1ccc(cc1)C(C)C)c1[nH]c2c(n1)cc(OC)cc2	3.42	6	5.46597	-0.534026	7.7266	22	0.351209
CHEMBL1928095	s1c(-c2cc(OC)c(OC)cc2)c(C)c(C#N)c1\N=C\c1ccc(cc1)-c1ccccc1	1.4	6.39	5.85387	-0.536128	8.27492	32	0.258591
CHEMBL407034	Oc1c(cc(cc1C)\C=C\C(=O)\C=C\c1cc(C)c(O)c(c1)C)C	62.8	4.74	4.20204	-0.53796	5.93993	24	0.247497
CHEMBL255389	o1c(nc(CCOc2cc(ccc2)C[C@H]2[C@H](N(C2=O)c2ccc(cc2)C(C)(C)C)C(O)=O)c1C)-c1ccccc1	0.23	7.2	6.63827	-0.561728	9.38374	40	0.234593
CHEMBL3114722	s1cncc1COC(=O)N[C@@H](Cc1ccccc1)CC[C@@H](NC(=O)[C@@H](NC(=O)N(Cc1nc(sc1)C(C)C)C)C(C)C)Cc1ccccc1	13.8	5.43	4.86012	-0.569879	6.87018	49	0.140208
CHEMBL1824241	O1CCN(CC1)C1CCC(CC1)c1ccc(OCCCN2CCCCC2)cc1	44	4.93	4.35655	-0.573453	6.15833	28	0.219941
CHEMBL3298907	ClC=1C=Cn2c(nc(CC)c2C(=O)NCc2ccc(N3CCC(CC3)c3ccc(Cl)cc3)cc2)C=1	0.19	7.3	6.72125	-0.578754	9.50103	35	0.271458
CHEMBL1171709	Fc1ccc(cc1)CCN1CCN(CC1)c1c2c(nc(cc2)C)ccc1	31.6228	5.08	4.5	-0.58	6.36112	26	0.244658
CHEMBL595632	O(CCc1cc2c(cc1)cccc2)c1cc(ccc1\C=C\C(O)=O)Cn1nccc1	12.8	5.5	4.89279	-0.60721	6.91636	30	0.230545
CHEMBL3114724	s1cncc1COC(=O)N(Cc1ccccc1)CCCCN(Cc1ccccc1)C(=O)[C@@H](NC(=O)N(Cc1nc(sc1)C(C)C)C)C(C)C	3.4	6.08	5.46852	-0.611479	7.7302	49	0.157759
CHEMBL1824231	O(CCCN1CCCCC1)c1ccc(cc1)C1CCC(N(C)C)CC1	40.7	5.01	4.39041	-0.619594	6.2062	25	0.248248
CHEMBL605833	O(CCc1cc2c(cc1)cccc2)c1cc(ccc1CCC(O)=O)Cn1nccc1	30	5.17	4.52288	-0.647121	6.39346	30	0.213115
CHEMBL1171008	Clc1cc(S(=O)(=O)Nc2cc(Cl)cnc2Oc2ccccc2C(O)=O)ccc1Cl	21.3796	5.32	4.67	-0.65	6.60143	29	0.227635
CHEMBL2018925	S(Cc1cc(Oc2ccccc2)ccc1)c1[nH]c2c(n1)cc(OC)cc2	0.96	6.67	6.01773	-0.652271	8.50655	26	0.327175
CHEMBL2059520	s1c(cnc1-c1cc(C#N)c(OC(C)C)cc1)-c1cccc(CCCC(O)=O)c1CC	3.98107	6.06	5.4	-0.66	7.63334	31	0.246237
CHEMBL14460	FC(F)(F)c1cc2N(CCc2cc1C)C(=O)Nc1ccc(Oc2cccnc2C)nc1	23	5.3	4.63827	-0.661728	6.55658	31	0.211502
CHEMBL434063	O(CCN(C)c1ncccc1)c1ccc(cc1)C[C@H](Nc1ccccc1C(=O)c1ccccc1)C(O)=O	4	6.06	5.39794	-0.66206	7.63043	37	0.206228
CHEMBL1223751	Clc1ccccc1Cn1nc(C)c(CN(CC(O)COc2ccc(OCC)cc2)C)c1C	43	5.03	4.36653	-0.663468	6.17245	32	0.192889
CHEMBL196945	Clc1cc(ccc1Cl)-c1ccc(cc1F)C1(CC1)C(O)=O	38	5.09	4.42022	-0.669784	6.24834	21	0.29754
CHEMBL233245	Clc1cc(C=2CCCC=2c2nncc(c2)C(O)=O)c(OCc2ccc(F)cc2F)cc1	5.4	5.94	5.26761	-0.672394	7.44619	31	0.2402
CHEMBL248231	O1CC(=O)N(c2cc(ccc12)CN1CCN(CC1)CCOc1c2c(nc(cc2)C)ccc1)Cc1ccccc1	7	5.83	5.1549	-0.675098	7.28687	39	0.186843
CHEMBL230042	Clc1cc(ccc1)C(O)CNC=1C=CNC(=O)C=1c1[nH]c2c(n1)c(cc(c2)C1=NC(CN1)(C)C)C	47	5.01	4.3279	-0.682098	6.11784	35	0.174795
CHEMBL3298905	ClC=1C=Cc2n(C=1)c(C(=O)NCc1ccc(N3CCN(CC3)c3ccc(OC(F)(F)F)cc3)cc1)c(n2)CC	0.57	6.93	6.24413	-0.685875	8.82658	39	0.226323
CHEMBL248229	O1CC(=O)N(c2cc(ccc12)CN1CCN(CC1)CCOc1c2c(nc(cc2)C)ccc1)CCCC	12	5.63	4.92082	-0.709181	6.95598	36	0.193222
CHEMBL3298908	ClC=1C=Cc2n(C=1)c(C(=O)NCc1ccc(N3CCC(CC3)c3ccc(Cl)cc3)cc1)c(n2)CC	0.26	7.3	6.58503	-0.714973	9.30847	35	0.265956
CHEMBL1091218	FC(F)(F)c1ccc(cc1)-c1oc(C)c(n1)COc1cc(ccc1)CN(CC(O)=O)C(Oc1ccc(cc1)C)=O	4.4	6.08	5.35655	-0.723453	7.57192	40	0.189298
CHEMBL245196	S(=O)(=O)(N)c1ccc(-n2nc(cc2-c2ccc(cc2)C)-c2ccccc2)cc1	16	5.52	4.79588	-0.72412	6.77937	28	0.24212
CHEMBL466191	Clc1cc(Cl)ccc1Nc1ncc(C(=O)NCC2CCOCC2)c(c1)C(C)C	40	5.13	4.39794	-0.73206	6.21685	28	0.22203
CHEMBL381860	Clc1cc2-c3c(C(Oc2cc1)CC(=O)C)c(O)nc1c3cc(cc1)C(F)(F)F	19.49	5.45	4.71019	-0.739812	6.65823	28	0.237794
CHEMBL506247	O1[C@H](COC(=O)c2cc(OC(=O)c3cc(O)c(O)c(O)c3)c(O)c(O)c2)[C@@H](OC(=O)c2cc(OC(=O)c3cc(O)c(O)c(O)c3)c(O)c(O)c2)[C@H](OC(=O)c2cc(OC(=O)c3cc(O)c(O)c(O)c3)c(O)c(O)c2)[C@@H](OC(=O)c2cc(OC(=O)c3cc(O)c(O)c(O)c3)c(O)c(O)c2)[C@@H]1OC(=O)c1cc(OC(=O)c2cc(O)c(O)c(O)c2)c(O)c(O)c1	4.6074	6.09	5.33654	-0.753456	7.54364	122	0.0618331
CHEMBL3291120	S(CC(O[C@@H]1C[C@](C=C)(C)[C@@H](O)[C@@H]([C@]23[C@H]([C@@]1(C)[C@@H](CC2)C)C(=O)CC3)C)=O)c1cc(ccc1)CO	11.1	5.71	4.95468	-0.755323	7.00384	35	0.20011
CHEMBL1824235	O(CCCN1CCCCC1)c1ccc(cc1)C1CCC(N2CCCC2)CC1	15.3	5.58	4.81531	-0.764691	6.80683	27	0.252105
CHEMBL3298909	ClC=1C=Cn2c(nc(CC)c2C(=O)NCc2ccc(N3CCC(CC3)c3ccc(OC(F)(F)F)cc3)cc2)C=1	0.14	7.62	6.85387	-0.766128	9.68851	39	0.248423
CHEMBL3104375	FC(F)(F)c1ccc(N(C2CCN(CC2)c2ncc(cc2)C(F)(F)F)c2cccnc2)cc1	8.1	5.86	5.09152	-0.768485	7.19727	33	0.218099
CHEMBL1077335	OC(=O)\C=C\c1ccc(NC(=O)C2(NC(=O)c3cc4nc(n(c4cc3)C3CCCCC3)-c3ncccc3)CCCC2)cc1	4	6.19	5.39794	-0.79206	7.63043	43	0.177452
CHEMBL2204363	Cl.Clc1cc(ccc1Sc1ccccc1N1CCNCC1)C	40	5.19	4.39794	-0.79206	6.21685	22	0.282584
CHEMBL2018918	S(Cc1ccc(cc1)C(C)(C)C)c1[nH]c2c(n1)cc(OC)cc2	2.54	6.4	5.59517	-0.804834	7.90922	23	0.343879
CHEMBL427548	Fc1cc(ccc1-c1cc(F)c(cc1)-c1ccc(F)cc1)C1(CC1)C(O)=O	7	5.96	5.1549	-0.805098	7.28687	27	0.269884
CHEMBL1916700	FC(F)(F)c1cc(CN(CC)C(OCc2ccccc2)=O)c(cc1)-c1cc(ccc1OC)CC(O)=O	18	5.55	4.74473	-0.805273	6.70706	36	0.186307
CHEMBL1829763	Fc1cc(F)ccc1-c1ccc(cc1)[C@@H](N1CC[C@@](OC1=O)(CCO)c1ccc(F)cc1)C	4.9	6.12	5.3098	-0.810196	7.50584	33	0.22745
CHEMBL248407	O1CC(=O)N(c2cc(ccc12)CN1CCN(CC1)CCOc1c2c(nc(cc2)C)ccc1)CCc1ccccc1	4	6.22	5.39794	-0.82206	7.63043	40	0.190761
CHEMBL2018908	S(CCCCCCC)c1[nH]c2c(n1)cc(OC)cc2	4.57	6.18	5.34008	-0.839916	7.54864	19	0.397297
CHEMBL436483	Fc1cc(ccc1-c1ccc(OC2CCC(CC2)C(F)(F)F)cc1)C1(CC1)C(O)=O	20	5.56	4.69897	-0.86103	6.64238	30	0.221413
CHEMBL2018573	Fc1ccc(cc1)C[C@@H]1C[C@H](N(C1)C(=O)Cn1nccn1)C(=O)Nc1ccc(Oc2ccc(F)cc2)cc1	17.39	5.63	4.7597	-0.8703	6.72822	38	0.177059
CHEMBL1650510	FC(F)(F)c1ccccc1-c1cc2nc([nH]c2cc1)C1=NOC2(C1)CCCCC2	1.7	6.66	5.76955	-0.890449	8.15573	29	0.281232
CHEMBL256092	Clc1cc(Cn2nc(NC(OC(C)C)=O)cc2C)c(OCc2ccccc2)cc1	17	5.66	4.76955	-0.890449	6.74215	29	0.232488
CHEMBL388226	FC(F)(F)c1ccc(cc1)-c1n(nc(c1)C(F)(F)F)-c1ccc(cc1)CC(O)=O	25	5.5	4.60206	-0.89794	6.50539	29	0.224324
CHEMBL346178	Clc1cc(ccc1Cl)[C@]1(CCCN(C1)C(=O)c1ccccc1)CCCN1CCC(N(C(=O)C)C)(CC1)c1ccccc1	11	5.86	4.95861	-0.901393	7.0094	42	0.16689
CHEMBL2204356	Cl.Clc1c(Sc2ccccc2N2CCNCC2)cccc1Cl	40	5.3	4.39794	-0.90206	6.21685	22	0.282584
CHEMBL1171895	s1cccc1-c1nc2c(cccc2)c(C(=O)N[C@@H](C)C2CCCCC2)c1Cc1cncnc1	31.6228	5.42	4.5	-0.92	6.36112	33	0.192761
CHEMBL267210	Clc1ccc(cc1)-c1nc2c(ccc(C)c2C)c(C(O)=O)c1O	2	6.62	5.69897	-0.92103	8.05596	23	0.350259
CHEMBL1824234	O(CCCN1CCCCC1)c1ccc(cc1)C1CCC(N2CCCC2)CC1	22.3	5.58	4.6517	-0.928305	6.57555	27	0.243539
CHEMBL474193	O([C@@H]([C@H](NC(=O)c1cc2c(cc1NC(=O)Nc1c(cc(cc1C)C)C)cccc2)C(O)=O)C)C1(CCCC1)C	7.23	6.09	5.14086	-0.949138	7.26703	39	0.186334
CHEMBL231350	Clc1ccc(cc1)-c1ccc(S(=O)(=O)Nc2cc3CCN(CCc3cc2NC(C)C)C)cc1	17	5.72	4.76955	-0.950449	6.74215	33	0.204308
CHEMBL2204359	Cl.Clc1cc(Cl)ccc1Sc1ccccc1N1CCNCC1	34	5.42	4.46852	-0.951479	6.31662	22	0.287119
CHEMBL196947	Fc1cc(ccc1-c1ccc(cc1)-c1ccc(O)cc1)C1(CC1)C(O)=O	89	5.01	4.05061	-0.95939	5.72587	26	0.220226
CHEMBL257517	o1c(nc(CCOc2cc(ccc2)C[C@H]2[C@H](N(C2=O)c2ccc(cc2)C(C)(C)C)C(O)=O)c1C)-c1ccc(OC)cc1	0.55	7.22	6.25964	-0.960363	8.84851	42	0.210679
CHEMBL2387504	Clc1cccc(F)c1-c1[nH]c-2c(n1)C(=O)Nc1cc(ccc1-2)-c1ccccc1C	17	5.73	4.76955	-0.960449	6.74215	29	0.232488
CHEMBL2385904	OC(=O)Cn1c2CCN(Cc2c2c1cccc2)C(=O)c1ccc(cc1)-c1ccc(cc1)CC	14	5.83	4.85387	-0.976128	6.86134	33	0.207919
CHEMBL2387505	Clc1cccc(F)c1-c1[nH]c-2c(n1)C(=O)Nc1cc(ccc1-2)-c1cc(ccc1)C	9	6.03	5.04576	-0.984243	7.13259	29	0.245951
CHEMBL486444	BrC=1C(=O)C2(CCCCC2)C=1N[C@@H](Cc1ccc(-n2c3ncccc3nc2C(C)C)cc1)C(O)=O	18	5.74	4.74473	-0.995273	6.70706	35	0.19163
CHEMBL485612	Clc1cc(F)c(cc1)C1N=C(NC(C)=C1C(=O)Nc1cc2c([nH]nc2)cc1F)c1cc(OC)ncc1	8.4	6.08	5.07572	-1.00428	7.17494	36	0.199304
CHEMBL536754	Cl.O(c1ccc(cc1)CN1CCC2(N(CCCC)C(=O)[C@H](NC2=O)[C@H](O)C2CCCCC2)CC1)c1ccccc1	3.7	6.45	5.4318	-1.0182	7.67829	40	0.191957
CHEMBL1834661	Clc1c(NC(=O)N(C)c2ncnc(Nc3ccc(cc3)C3CCN(CC3)CC)c2)c(Cl)c(OC)cc1OC	4	6.42	5.39794	-1.02206	7.63043	38	0.200801
CHEMBL1643789	S(=O)(=O)(N(Cc1ccc(F)cc1)[C@@H]1CCc2n(C1)c1c(cccc1)c2CC(O)=O)c1ccc(F)cc1	21	5.7	4.67778	-1.02222	6.61242	36	0.183678
CHEMBL272963	o1c(nc(CCOc2cc(ccc2)C[C@@H]2[C@@H](N(C2=O)c2ccc(cc2)C(C)(C)C)C(O)=O)c1C)-c1ccccc1	0.67	7.2	6.17393	-1.02607	8.72735	40	0.218184
CHEMBL497783	Clc1cc(ccc1)\C=C\C(=O)\C=C\c1cc(Cl)ccc1	21.3	5.7	4.67162	-1.02838	6.60372	20	0.330186
CHEMBL404646	o1c(nc(CCOc2cc(ccc2)C[C@H]2[C@H](N(C2=O)c2ccc(cc2)C(C)(C)C)C(O)=O)c1C)-c1cc(OC)ccc1	0.65	7.22	6.18709	-1.03291	8.74595	42	0.208237
CHEMBL1651208	Clc1ccc(cc1C(O)=O)-c1cc(ccc1)COc1cc2c(cc1)C(=O)N(C2)C1CCCC1	8.2	6.13	5.08619	-1.04381	7.18974	33	0.217871
CHEMBL465470	Clc1cc(Cl)ccc1Nc1ncc(C(=O)NCC2CCOCC2)c(c1)C(C)(C)C	17	5.82	4.76955	-1.05045	6.74215	29	0.232488
CHEMBL480732	Clc1cc(Cl)cc(Cl)c1NC(=O)Nc1cc2c(cc1C(=O)N[C@H](C(O)=O)C1CCC(CC1)C)cccc2	0.18	7.8	6.74473	-1.05527	9.53422	37	0.257682
CHEMBL1171786	Clc1cc(S(=O)(=O)Nc2cc(Cl)ccc2Oc2ccccc2C(O)=O)ccc1Cl	4.16869	6.44	5.38	-1.06	7.60507	29	0.262244
CHEMBL1650528	FC(F)(F)c1ccccc1-c1cc(c2[nH]c(nc2c1)C1=NOC2(C1)CCCCC2)CCCO	6.8	6.23	5.16749	-1.06251	7.30467	33	0.221354
CHEMBL1170480	Fc1c(cccc1F)CCC1=NC(=O)c2cccnc2N1CC(=O)N(Cc1ccc(cc1)-c1ccc(cc1)C(F)(F)F)C1CCNCC1	19.9526	5.77	4.7	-1.07	6.64383	48	0.138413
CHEMBL1651219	Clc1ccc(cc1C(O)=O)-c1cc(ccc1)COc1cc2SN(C3CCCC3)C(=O)c2cc1	4	6.49	5.39794	-1.09206	7.63043	33	0.231225
CHEMBL2152522	N1(CCCCC1)[C@H]([C@@H](N1CCCCC1)c1ccccc1)c1ccccc1	19.9526	5.8	4.7	-1.1	6.64383	26	0.255532
CHEMBL2152523	N1(CCCCC1)[C@@H]([C@H](N1CCCCC1)c1ccccc1)c1ccccc1	19.9526	5.8	4.7	-1.1	6.64383	26	0.255532
CHEMBL1923502	Cl.Fc1ccc(cc1)C[C@H]1NC(=O)[C@H](N(C)C(=O)[C@@H](NC[C@H](Oc2c(CCCNC1=O)cccc2)C)C1CC1)C.O	66	5.29	4.18046	-1.10954	5.90941	41	0.144132
CHEMBL270902	Clc1cc(Cl)ccc1C(Oc1ccc(Cl)cc1Cl)Cn1ccnc1	10	6.11	5	-1.11	7.06791	24	0.294496
CHEMBL565591	Clc1cc(Cl)ccc1Cn1c2c(cc(F)cc2\C=C\C(=O)NS(=O)(=O)c2sc(Cl)c(Cl)c2)c(c1)C	0.03	8.64	7.52288	-1.11712	10.6342	35	0.303834
CHEMBL3215850	Cl.Cl.Cl.Clc1cccc(N2CCN(CC2)CCCNC(=O)c2nc(n(c2Cn2ncnc2)-c2ccccc2)-c2ccccc2)c1C	3.3	6.6	5.48149	-1.11851	7.74853	46	0.168446
CHEMBL561696	S(C)c1ccc(Nc2nc3cc(ccc3n2Cc2ccccc2C(F)(F)F)C(=O)N)cc1	14	6	4.85387	-1.14613	6.86134	32	0.214417
CHEMBL481363	OC(=O)C1(NC(=O)c2cc3c(cc2NC(=O)Nc2c(cc(cc2C)C)C)cccc3)CCCCCC1	4.1	6.54	5.38722	-1.15278	7.61527	36	0.211535
CHEMBL14276	Fc1cc(cc(NC(=O)N2CCc3cc(OC)c(cc23)C(F)(F)F)c1)-c1cccnc1	82	5.24	4.08619	-1.15381	5.77616	31	0.186328
CHEMBL81	s1c2c(ccc(O)c2)c(C(=O)c2ccc(OCCN3CCCCC3)cc2)c1-c1ccc(O)cc1	2	6.86	5.69897	-1.16103	8.05596	34	0.23694
CHEMBL207831	OC(C1CCN(CC1)CCCC(=O)c1ccc(cc1)CC=C)(c1ccccc1)c1ccccc1	21	5.84	4.67778	-1.16222	6.61242	34	0.194483
CHEMBL1777855	Fc1cc(Oc2ccc(cc2OC(F)F)C(F)(F)F)ccc1C(CC(O)=O)C#CC	28	5.74	4.55284	-1.18716	6.43581	30	0.214527
CHEMBL231430	Clc1ccc(cc1)-c1ccc(S(=O)(=O)Nc2cc3CCN(CCc3cc2)C)cc1	45	5.55	4.34679	-1.20321	6.14454	29	0.211881
CHEMBL1170305	Fc1cc(ccc1)[C@H](NC(=O)c1c2c(nc(-c3ccccc3)c1C)cccc2)C1CC1	7.94328	6.31	5.1	-1.21	7.20927	31	0.232557
CHEMBL1778587	o1cc(cc1)-c1n(c2c(ccc(c2)C(=O)NC(C(=O)Nc2ccc(cc2)\C=C\C(O)=O)(C)C)c1C1CCCCC1)C	2.4	6.84	5.61979	-1.22021	7.94403	41	0.193757
CHEMBL210514	o1c(ccc1Oc1cc2c(cc1C)CCC2(C)C)C(=O)Nc1c(OC)nc(nc1OC)NCCCN1CCOCC1	3	6.75	5.52288	-1.22712	7.80704	41	0.190416
CHEMBL537424	Cl.O(c1ccc(cc1)CN1CCC2(N(CCCC)C(=O)C(NC2=O)CC(C)C)CC1)c1ccccc1	5.9	6.46	5.22915	-1.23085	7.39183	36	0.205329
CHEMBL2387501	Clc1cccc(C(F)(F)F)c1-c1[nH]c-2c(n1)C(=O)Nc1cc(ccc1-2)-c1ccccc1	9.8	6.27	5.00877	-1.26123	7.08031	31	0.228397
CHEMBL1630	Cl.Clc1cc2nccc(Nc3cc(CN(CC)CC)c(O)cc3)c2cc1	62	5.47	4.20761	-1.26239	5.9478	26	0.228761
CHEMBL258199	Clc1cc(Cn2nc(NC(OC(C)(C)C)=O)cc2C)c(OCc2ccccc2)cc1	16	6.06	4.79588	-1.26412	6.77937	30	0.225979
CHEMBL1262	Clc1cc(Cl)ccc1CO\N=C(/Cn1ccnc1)\c1ccc(Cl)cc1Cl	3	6.8	5.52288	-1.27712	7.80704	26	0.300271
CHEMBL1778481	OC(=O)\C=C\c1ccc(NC(=O)C(NC(=O)c2cc3n(C)c(c(c3cc2)C2CCCCC2)-c2ncccc2)(C)C)cc1	7.9	6.39	5.10237	-1.28763	7.21262	42	0.171729
CHEMBL2387507	Clc1cccc(F)c1-c1[nH]c-2c(n1)C(=O)Nc1cc(ccc1-2)-c1ccccc1Cl	21	5.99	4.67778	-1.31222	6.61242	29	0.228015
CHEMBL3261407	S(=O)(=O)(N[C@@H](CNc1c2c(n(nc2)-c2ccc(F)cc2)ccc1)C)c1c(cc(cc1C)C)C	7.9	6.42	5.10237	-1.31763	7.21262	33	0.218564
CHEMBL389996	Clc1cc(C=2CCCC=2c2nc(cnc2)C(O)=O)c(OCc2ccc(F)cc2F)cc1	12	6.24	4.92082	-1.31918	6.95598	31	0.224386
CHEMBL147587	Clc1cc2nccc(Nc3cc(O)c(cc3)CN(CC)CC)c2cc1	75	5.47	4.12494	-1.34506	5.83094	25	0.233237
CHEMBL1090212	Clc1ccc(cc1)-c1sc(COc2cc(ccc2)CN(CC(O)=O)C(Oc2ccc(cc2)C)=O)c(n1)C	3.7	6.78	5.4318	-1.3482	7.67829	37	0.207521
CHEMBL8414	Clc1cc(S(=O)(=O)N2CC(N(c3c(C2)cccc3)Cc2nc[nH]c2C)CCc2ccccc2)ccc1Cl	2	7.07	5.69897	-1.37103	8.05596	37	0.217729
CHEMBL2151164	Fc1ccc(cc1)-c1nc2c(n1C)cccc2Nc1nc(OC)c(-n2cc(nc2)C)cc1	21.9	6.05	4.65956	-1.39044	6.58666	32	0.205833
CHEMBL603	S(=O)(=O)(NC(=O)c1cc(OC)c(cc1)Cc1c2cc(NC(OC3CCCC3)=O)ccc2n(c1)C)c1ccccc1C	2.2575	7.09	5.64637	-1.44363	7.98161	41	0.194673
CHEMBL1916708	Clc1ccc(cc1)COC(=O)N(Cc1cc(ccc1-c1cc(ccc1OC)CC(O)=O)C(F)(F)F)CC	18	6.27	4.74473	-1.52527	6.70706	37	0.181272
CHEMBL2059521	s1c(ccc1-c1cc(C#N)c(OC(C)C)cc1)-c1cccc(CCCC(O)=O)c1CC	1.58489	7.33	5.8	-1.53	8.19877	31	0.264477
CHEMBL1668239	Clc1ccc(cc1)-c1nc2cc(F)c(F)cc2n1[C@H](C(=O)NC1CCC(O)CC1)C1CCCCC1	40	5.93	4.39794	-1.53206	6.21685	35	0.177624
CHEMBL272336	Clc1ccc(cc1)-c1oc(C)c(n1)CCOc1cc(ccc1)C[C@H]1[C@H](N(C1=O)c1ccc(cc1)C(C)(C)C)C(O)=O	0.41	7.93	6.38722	-1.54278	9.02885	41	0.220216
CHEMBL1086754	Clc1c(N2CCN(CC2)CCCNC(=O)c2cc(n(C)c2C)-c2ccccc2)cccc1Cl	9.7	6.6	5.01323	-1.58677	7.08661	33	0.214746
CHEMBL1760428	Clc1c(cccc1N(S(=O)(=O)c1ccc(OC(C(O)=O)C)c(C)c1C)CCCC)-c1ccc(cc1)C(F)(F)F	0.79433	7.69	6.1	-1.59	8.62285	39	0.221099
CHEMBL1171894	s1cccc1-c1nc2c(cccc2)c(C(=O)N[C@@H](C)C2CCCCC2)c1C	19.9526	6.31	4.7	-1.61	6.64383	27	0.246068
CHEMBL207174	Clc1cc(-c2ccccc2-c2cc(ccc2)C(O)=O)c(OCc2ccccc2)cc1	3.9	7.04	5.40894	-1.63106	7.64597	30	0.254866
CHEMBL1091664	Clc1ccc(cc1)-c1sc(C)c(n1)COc1cc(ccc1)CN(CC(O)=O)C(Oc1ccc(cc1)C)=O	7.1	6.78	5.14874	-1.63126	7.27817	37	0.196707
CHEMBL1077334	o1cc(cc1)-c1nc2cc(ccc2n1C1CCCCC1)C(=O)NC1(CCCC1)C(=O)Nc1ccc(cc1)\C=C\C(O)=O	11.5	6.58	4.9393	-1.6407	6.98211	42	0.166241
CHEMBL1650521	Fc1cc(cc2nc([nH]c12)C1=NOC2(C1)CCCCC2)-c1ccccc1C(F)(F)F	6.4	6.84	5.19382	-1.64618	7.34189	30	0.24473
CHEMBL404451	o1c(nc(CCOc2ccc(cc2)C[C@@H]2[C@@H](N(C2=O)c2ccc(cc2)C(C)(C)C)C(O)=O)c1C)-c1ccccc1	3	7.2	5.52288	-1.67712	7.80704	40	0.195176
CHEMBL10188	Oc1c(nc2c(cccc2)c1C(=O)N[C@@H](CC)c1ccccc1)-c1ccccc1	2	7.38	5.69897	-1.68103	8.05596	29	0.277792
CHEMBL1760005	Clc1c(cccc1N(S(=O)(=O)c1ccc(OC(C(O)=O)C)c(C)c1C)CCCC)-c1ccc(OC(F)(F)F)cc1	0.79433	7.83	6.1	-1.73	8.62285	40	0.215571
CHEMBL482146	OC(=O)[C@@](NC(=O)c1cc2c(cc1NC(=O)Nc1c(cc(cc1C)C)C)cccc2)(C)C1CCCCC1	9.2	6.79	5.03621	-1.75379	7.1191	37	0.192408
CHEMBL429734	Clc1cc(ccc1)-c1oc(C)c(n1)CCOc1cc(ccc1)C[C@H]1[C@H](N(C1=O)c1ccc(cc1)C(C)(C)C)C(O)=O	0.67	7.93	6.17393	-1.75607	8.72735	41	0.212862
CHEMBL430841	Clc1cc2CN3[C@@H](C4CC3CC4)CN(c2cc1)C(=O)c1ccc(NC(=O)c2ccccc2-c2ccc(cc2)C)cc1	7.4	6.89	5.13077	-1.75923	7.25276	41	0.176897
CHEMBL2047188	Clc1nc([nH]c1-c1ccc(cc1)-c1ccc(cc1)-c1[nH]c(nc1Cl)[C@H]1N(CCC1)C(=O)[C@@H](NC(OC)=O)C(C)C)[C@H]1N(CCC1)C(=O)[C@@H](NC(OC)=O)C(C)C	81.6	5.85	4.08831	-1.76169	5.77916	56	0.103199
CHEMBL453384	Clc1cc2nccc(Nc3cc(CNC(C)(C)C)c(F)cc3)c2cc1	52	6.09	4.284	-1.806	6.05578	25	0.242231
CHEMBL2059527	O(C(C)C)c1ccc(cc1C#N)-c1ccc(cc1)-c1cccc(CCCC(O)=O)c1CC	3.98107	7.25	5.4	-1.85	7.63334	32	0.238542
CHEMBL196426	Clc1cc(-c2c3cc(ccc3nc(O)c2SC[C@@H](O)CN(CC)CC)C(F)(F)F)c(O)cc1	37.66	6.28	4.42412	-1.85588	6.25385	33	0.189511
CHEMBL1650525	Fc1ccccc1-c1cc(c2[nH]c(nc2c1)C1=NOC2(C1)CCCCC2)C(F)(F)F	10	6.86	5	-1.86	7.06791	30	0.235597
CHEMBL1080473	[nH]1c2c(cc(nc2NCc2c(cccc2C)C)-c2ccccc2)c(C)c1C	6.7	7.04	5.17393	-1.86607	7.31376	27	0.27088
CHEMBL208528	OC(C1CCN(CC1)CCCC(=O)c1ccc(cc1)CCC)(c1ccccc1)c1ccccc1	26	6.47	4.58503	-1.88497	6.48131	34	0.190627
CHEMBL1650524	Brc1cc(cc2nc([nH]c12)C1=NOC2(C1)CCCCC2)-c1ccccc1C(F)(F)F	2.2	7.56	5.65758	-1.90242	7.99745	30	0.266582
CHEMBL12131	Ic1cc(I)cc(C(=O)Nc2cc(Cl)c(cc2C)C(C#N)c2ccc(Cl)cc2)c1O	2	7.64	5.69897	-1.94103	8.05596	30	0.268532
CHEMBL2017269	o1nc(C)c(-c2cc3ncc(C(O)=O)c(Nc4ccccc4C(C)(C)C)c3cc2)c1C	10	6.95	5	-1.95	7.06791	31	0.227997
CHEMBL389796	Clc1cc(C=2CCCC=2c2cc(C(O)=O)c(nc2)C)c(OCc2ccc(F)cc2)cc1	9	7	5.04576	-1.95424	7.13259	31	0.230084
CHEMBL1667948	Fc1c2nc(ccc2ccc1-c1nc(n2c1C(=NC=C2)N)C1CCC(CC1)C(=O)Nc1[nH]c2c(n1)cccc2)-c1ccccc1	9.8	6.98	5.00877	-1.97123	7.08031	45	0.15734
CHEMBL452051	Clc1ccc(cc1)C(=O)c1c2c(n(Cc3cc(O[C@H](C(O)=O)C)ccc3)c1C)cc(OC(F)(F)F)cc2	5.6	7.23	5.25181	-1.97819	7.42386	37	0.200645
CHEMBL196427	Clc1cc(-c2c3cc(ccc3nc(O)c2SC[C@@H](O)CN(CC)CC)C(F)(F)F)c(O)cc1	50.68	6.28	4.29516	-1.98484	6.07156	33	0.183987
CHEMBL1668257	Clc1ccc(cc1)-c1nc2cc(F)c(F)cc2n1[C@@H](C(=O)Nc1ccc(cc1F)-c1[nH]nnn1)C1CCCCC1	7.1	7.14	5.14874	-1.99126	7.27817	40	0.181954
CHEMBL2152165	Clc1ccc(nc1)[C@](NC(=O)NC1CCCC1)(Cc1ccccc1)c1cc(OC(F)(F)C(F)F)cc(F)c1	4.4	7.37	5.35655	-2.01345	7.57192	38	0.199261
CHEMBL8153	S(=O)(=O)(N1CC(N(c2c(C1)cccc2)Cc1nc[nH]c1C)CCc1ccccc1)c1ccc(cc1)C(C)(C)C	3	7.59	5.52288	-2.06712	7.80704	39	0.20018
CHEMBL233043	FC(F)(F)c1cc(C=2CCCC=2c2cc(cnc2)C(O)=O)c(OCc2ccccc2)cc1	14	6.93	4.85387	-2.07613	6.86134	32	0.214417
CHEMBL447955	Fc1ccc(cc1)[C@H]1[C@H]2[C@H](CC[C@@H]1O[C@H](C)c1cc(cc(c1)C(F)(F)F)C(F)(F)F)CN(C2)C1=CC(=O)CC1	30	6.63	4.52288	-2.10712	6.39346	39	0.163935
CHEMBL383090	Clc1cc(-c2n(ccc2)-c2cc(ccc2)C(O)=O)c(OCc2ccccc2)cc1	7.3	7.29	5.13668	-2.15332	7.26111	29	0.250383
CHEMBL1650527	Clc1ccccc1-c1cc(c2[nH]c(nc2c1)C1=NOC2(C1)CCCCC2)C(F)(F)F	10	7.18	5	-2.18	7.06791	30	0.235597
CHEMBL1650522	Clc1cc(cc2nc([nH]c12)C1=NOC2(C1)CCCCC2)-c1ccccc1C(F)(F)F	6	7.41	5.22185	-2.18815	7.38151	30	0.24605
CHEMBL1650526	FC(F)(F)c1cc(cc2nc([nH]c12)C1=NOC2(C1)CCCCC2)-c1ccccc1OC(F)(F)F	10	7.19	5	-2.19	7.06791	34	0.20788
CHEMBL364738	Fc1cc(ccc1-c1ccc(cc1)C1CCCCC1)C(C(O)=O)(C)C	28	6.77	4.55284	-2.21716	6.43581	25	0.257433
CHEMBL1955989	FC(F)(F)c1ccccc1-c1cc2nc([nH]c2cc1)\C=C\C1CCCCC1	3.5	7.71	5.45593	-2.25407	7.7124	27	0.285645
CHEMBL3217170	Cl.Cl.Cl.Clc1cccc(N2CCN(CC2)CCCNC(=O)c2nc(n(c2C)-c2ccccc2)-c2ccccc2)c1C	2.9	7.8	5.5376	-2.2624	7.82785	41	0.190923
CHEMBL1644183	Clc1cc(cc(Cl)c1)-c1nn(Cc2ccc(cc2)C(=O)NCCC(O)=O)c(c1)-c1ccc(OC(F)(F)F)cc1	5.8	7.51	5.23657	-2.27343	7.40232	39	0.189803
CHEMBL1170482	Fc1c(cccc1F)CCC1=NC(=O)c2c(N1CC(=O)N(Cc1ccc(cc1)-c1ccc(cc1)C(F)(F)F)C1CCNCC1)cccc2	15.8489	7.08	4.8	-2.28	6.78519	48	0.141358
CHEMBL234940	Clc1cc(C=2CCCC=2c2nc(ccc2)C(O)=O)c(OCc2ccc(F)cc2F)cc1	14	7.14	4.85387	-2.28613	6.86134	31	0.221334
CHEMBL3287865	O1c2cc(ccc2N(C[C@H]1C)C(=O)Nc1ccccc1)-c1ccc(cc1)C1CCC(CC1)CC(O)=O	14	7.17	4.85387	-2.31613	6.86134	36	0.190593
CHEMBL497137	Oc1c(cc(cc1CC)\C=C/1\CC\C(=C/c2cc(CC)c(O)c(c2)CC)\C\1=O)CC	37.7	6.75	4.42366	-2.32634	6.2532	30	0.20844
CHEMBL1210434	S(=O)(=O)(N(c1cc(cc(c1)C(=O)N[C@@H]([C@H](O)CNCc1cc(ccc1)C(F)(F)F)Cc1ccccc1)C1CCCC1)c1ccccc1)C	6.9	7.56	5.16115	-2.39885	7.29571	48	0.151994
CHEMBL536743	Cl.O(c1ccc(cc1)CN1CCC2(N(CCCC)C(=O)C(NC2=O)CC2CCCCC2)CC1)c1ccccc1	5.5	7.66	5.25964	-2.40036	7.43493	39	0.190639
CHEMBL480733	Clc1cc(Cl)cc(Cl)c1NC(=O)Nc1cc2c(cc1C(=O)N[C@H](C(O)=O)C1CCC(CC1)C(C)(C)C)cccc2	0.21	9.12	6.67778	-2.44222	9.43959	40	0.23599
CHEMBL1089270	Fc1ccc(cc1)[C@H]1C2N(C[C@@H]1O[C@H](C)c1cc(cc(c1)C(F)(F)F)C(F)(F)F)C(=O)C=C(C2)C=1CCN(CC=1)C(C)(C)C	36.5	6.88	4.43771	-2.44229	6.27306	44	0.14257
CHEMBL218583	Clc1ccc(cc1)-c1nc2c(cccc2-c2ccccc2)c(C(O)=O)c1O	8.2	7.56	5.08619	-2.47381	7.18974	27	0.266287
CHEMBL1672448	Clc1cccc(Cl)c1-c1noc(C(C)C)c1COc1ccc(cc1)-c1cc2c(nc(cc2)C(O)=O)cc1	4.4	7.84	5.35655	-2.48345	7.57192	37	0.204646
CHEMBL207577	Clc1cc(C=2CCCC=2c2cc(ccc2)C(O)=O)c(OCc2ccccc2)cc1	5.7	7.74	5.24413	-2.49587	7.413	29	0.255621
CHEMBL1096182	Clc1cc(Cl)ccc1-c1nc2OC(C[C@@H](NC(=O)c3n[nH]c(c3)C)c2cc1-c1ccc(Cl)cc1)(C)C	18	7.26	4.74473	-2.51527	6.70706	36	0.186307
CHEMBL595092	S(C(C)(C)C)c1c2cc(OC[C@H]3N(c4c(C3)cccc4)C(=O)C)ccc2n(Cc2ccc(cc2)-c2ncc(OC)cn2)c1CC(C(O)=O)(C)C	3.7	7.98	5.4318	-2.5482	7.67829	50	0.153566
CHEMBL1650511	FC(F)(F)c1ccccc1-c1cc(c2[nH]c(nc2c1)C1=NOC2(C1)CCCCC2)C(F)(F)F	10	7.6	5	-2.6	7.06791	33	0.214179
CHEMBL377852	Clc1cc(-c2n(c(cc2)C)-c2cc(ccc2)C(O)=O)c(OCc2ccccc2)cc1	6.5	7.79	5.18709	-2.60291	7.33237	30	0.244412
CHEMBL1668249	Clc1ccc(cc1)-c1nc2cc(F)c(F)cc2n1[C@H](C(=O)Nc1ccc(OC2(CC2)C(O)=O)cc1F)C1CCCCC1	29	7.2	4.5376	-2.6624	6.41427	42	0.152721
CHEMBL208791	Brc1cc(-c2n(c(cc2)C)-c2cc(ccc2)C(O)=O)c(OCc2ccc(F)cc2)cc1	3.9	8.08	5.40894	-2.67106	7.64597	31	0.246644
CHEMBL372751	Fc1cc(ccc1-c1ccc(cc1)C1CCC(CC1)(C)C)C1(CC1)C(O)=O	17	7.45	4.76955	-2.68045	6.74215	27	0.249709
CHEMBL1615152	Clc1ccc(cc1)-c1nc2cc(F)c(F)cc2n1[C@H](C(=O)Nc1ccc(cc1F)C(O)=O)C1CCCCC1	14	7.54	4.85387	-2.68613	6.86134	38	0.180562
CHEMBL552240	Clc1ccc(cc1)C(=O)c1c2c(n(Cc3cc(O[C@@H](CC)C(O)=O)ccc3)c1C)cc(OC(F)(F)F)cc2	10	7.76	5	-2.76	7.06791	38	0.185998
CHEMBL377649	Brc1cc(-c2n(c(cc2)C)-c2cc(ccc2)C(O)=O)c(OCc2ccccc2)cc1	6.8	7.94	5.16749	-2.77251	7.30467	30	0.243489
CHEMBL1668259	Clc1ccc(cc1)-c1nc2c(n1[C@H](C(=O)Nc1ccc(cc1C(F)(F)F)C(O)=O)C1CCCCC1)cccc2	28	7.38	4.55284	-2.82716	6.43581	39	0.165021
CHEMBL1668238	Clc1ccc(cc1)-c1nc2cc(F)c(F)cc2n1[C@@H](C(=O)NC1CCCCC1)C1CCCCC1	6.7	8.02	5.17393	-2.84607	7.31376	34	0.215111
CHEMBL1933349	Clc1cc(cc(Cl)c1)-c1nn([C@@H](C)c2ccc(cc2)C(=O)NCCC(O)=O)c(c1)-c1cc2c(cc(OC)cc2)cc1	14	7.84	4.85387	-2.98613	6.86134	41	0.16735
CHEMBL1615150	Clc1ccc(cc1)-c1nc2cc(F)c(F)cc2n1[C@H](C(=O)Nc1ccc(cc1C)C(O)=O)C1CCCCC1	19	7.73	4.72125	-3.00875	6.67387	38	0.175628
CHEMBL197140	Fc1cc(ccc1-c1ccc(OC2CC(CC(C2)(C)C)(C)C)cc1)C1(CC1)C(O)=O	15	7.84	4.82391	-3.01609	6.81899	30	0.2273
CHEMBL1668243	Clc1cc(ccc1NC(=O)[C@@H](n1c2cc(F)c(F)cc2nc1-c1ccc(Cl)cc1)C1CCCCC1)C(O)=O	18	7.86	4.74473	-3.11527	6.70706	38	0.176502
CHEMBL1615153	Clc1ccc(cc1)-c1nc2cc(F)c(F)cc2n1[C@H](C(=O)Nc1ccc(cc1)C(O)=O)C1CCCCC1	32	7.88	4.49485	-3.38515	6.35384	37	0.171725
CHEMBL3116156	Clc1ccc(nc1)[C@@](Nc1[nH]c2c(n1)cccc2)(Cc1ccccc1)c1cc(OC(F)(F)C(F)F)cc(F)c1	19	8.16	4.72125	-3.43875	6.67387	39	0.171125
CHEMBL10921	S(Cc1ccc(F)cc1)C1=NC(=O)C(=CN1CC(=O)N(Cc1ccc(cc1)-c1ccc(cc1)C(F)(F)F)CCN(CC)CC)Cc1cn(nc1)C	100	7.5	4	-3.5	5.65433	51	0.110869
CHEMBL1098560	s1cc(cc1)-c1cc(cc(OCCCCCCc2cccc(OCCCC(O)=O)c2CCC(O)=O)c1)-c1cc2OCOc2cc1	3.9	9.15	5.40894	-3.74106	7.64597	45	0.16991
CHEMBL476302	Clc1cccc(Cl)c1-c1noc(C(C)C)c1COc1ccc(cc1)-c1cc2c(cc1)c(ccc2)C(O)=O	17	8.52	4.76955	-3.75045	6.74215	37	0.18222
CHEMBL3116154	Clc1ccc(nc1)[C@@](Nc1[nH]c2c(n1)cc(F)cc2F)(Cc1ccccc1)c1cc(OC(F)(F)C(F)F)cc(F)c1	15	8.59	4.82391	-3.76609	6.81899	41	0.166317
CHEMBL244403	O(CCCCC)c1c2c(cccc2)c(cc1)C(=O)c1c2c(ccc1)cccc2	80.8	7.86	4.09259	-3.76741	5.78521	28	0.206615
CHEMBL3116158	Clc1ccc(nc1)[C@@](Nc1scc(n1)C(F)(F)F)(Cc1ccccc1)c1cc(OC(F)(F)C(F)F)cc(F)c1	40	8.19	4.39794	-3.79206	6.21685	39	0.159406
CHEMBL3116155	Clc1ccc(nc1)[C@@](Nc1[nH]c2c(n1)cc(F)cc2)(Cc1ccccc1)c1cc(OC(F)(F)C(F)F)cc(F)c1	40	8.41	4.39794	-4.01206	6.21685	40	0.155421
CHEMBL1094349	Fc1ccccc1-c1cc(cc(OCCCCCCc2cccc(OCCCC(O)=O)c2CCC(O)=O)c1)-c1cc2OCOc2cc1	7.6	9.65	5.11919	-4.53081	7.23639	47	0.153966
CHEMBL498372	Oc1c(cc(cc1C(C)(C)C)\C=C/1\CC\C(=C/c2cc(C(C)(C)C)c(O)c(c2)C(C)(C)C)\C\1=O)C(C)(C)C	55	9.84	4.25964	-5.58036	6.02134	38	0.158456
CHEMBL1213341	S(CCN(C)C)[C@@H]1N(C)C(=O)[C@@H](NC(=O)[C@@H](N(C)C(=O)[C@@H](N(C)C(=O)[C@@H](N(C)C(=O)[C@@H](N(C)C(=O)[C@H](NC(=O)[C@@H](NC(=O)[C@@H](N(C)C(=O)[C@@H](NC(=O)[C@@H](N(C)C1=O)CC(O)(C)C)C(C)C)CC(C)C)C)C)CC(C)C)CC(C)C)C(C)C)[C@H](O)[C@@H](C\C=C\C)C)CC	13.4	13.09	4.8729	-8.2171	6.88823	92	0.0748721
CHEMBL160	O=C1N(C)[C@@H]([C@H](O)[C@@H](C\C=C\C)C)C(=O)N[C@@H](CC)C(=O)N(CC(=O)N(C)[C@@H](CC(C)C)C(=O)N[C@@H](C(C)C)C(=O)N(C)[C@@H](CC(C)C)C(=O)N[C@@H](C)C(=O)N[C@H](C)C(=O)N(C)[C@@H](CC(C)C)C(=O)N(C)[C@@H](CC(C)C)C(=O)N(C)[C@H]1C(C)C)C	38.8	14.36	4.41117	-9.94883	6.23555	85	0.0733594
	CYP2C9 inhibitors with negative clogP and LipE>=5
	CYP2C9 inhibitors with positive clogP and LipE>=5

## Sheet: Table S3
Exploring the Chemical Space of Cytochrome P450 Inhibitors using Integrated Physicochemical Parameters, Drug Efficiency Metrics and Decision Tree Models Yusra Sajid Kiani and Ishrat Jabeen* Research Center for Modeling and Simulation (RCMS), National University of Science and Technology (NUST), Sector H-12, 44000, Islamabad, Pakistan * Correspondence: Corresponding Author: Ishrat.jabeen@rcms.nust…
TABLE S3: LipE and LE profiling results of CYP2C19 inhibitors dataset
CMPD_CHEMBLID CYP2c19	CANONICAL_SMILES	IC50(µM)	clogp	pIC50	LipE	ΔG	a_heavy	Ligand efficiency
CHEMBL2069802	S(=O)(=O)(Cc1oc(nn1)C(=O)NCc1ccncc1)c1ccccc1	9.8	-1.15	5.00877	6.15877	7.08031	25	0.283212
CHEMBL2069801	S(=O)(=O)(Cc1nc(on1)C(=O)NCc1ccncc1)c1ccccc1	1.3	-0.15	5.88606	6.03606	8.32042	25	0.332817
CHEMBL2170635	FC(F)(F)c1cc(ccc1C1CCN(CC1)C(=O)c1ccncc1)C(=O)NC(N)=N	0.06	1.56	7.22185	5.66185	10.2087	30	0.340289
CHEMBL3110021	o1cncc1-c1ccc(cc1)[C@@H]1[C@H]([C@H]1C(=O)NO)c1ccccc1	0.06	1.73	7.22185	5.49185	10.2087	24	0.425361
CHEMBL2036220	S(=O)(=O)(C)c1ccc(cc1)CN(C(=O)CC)c1cc(cc(F)c1)-c1[nH]nnn1	0.15	1.4	6.82391	5.42391	9.64615	28	0.344505
CHEMBL1672632	Fc1cnccc1-c1ncc(nc1-c1occn1)NC(=O)C1CC1	1	0.8	6	5.2	8.48149	24	0.353395
CHEMBL1089	N(N)CCc1ccccc1	0.8	1.03	6.09691	5.06691	8.61848	10	0.861848
CHEMBL113018	O1CCN(CC1)CCOc1ccc(-n2ccnc2)cc1	0.091	2.16	7.04096	4.88096	9.95297	20	0.497648
CHEMBL1200604	OCC(C(=O)N(Cc1ccncc1)CC)c1ccccc1	1	1.18	6	4.82	8.48149	21	0.40388
CHEMBL2419516	S(=O)(=O)(c1ccc(cc1)CNC(=O)N1Cc2c(C1)cncc2)c1ccc(nc1)N	6.2	0.42	5.20761	4.78761	7.36138	29	0.253841
CHEMBL638	Fc1cc(F)ccc1[C@](O)([C@@H](C)c1ncncc1F)Cn1ncnc1	5.25	0.52	5.27984	4.75984	7.46348	25	0.298539
CHEMBL579016	O1OC2(CC1(CC(=O)NCc1ccncc1)C)CCCCC2	0.1	2.29	7	4.71	9.89507	22	0.449776
CHEMBL1921976	O[C@@]1(CCn2c1cnc2)c1cc2c(cc(cc2)C(=O)NC)cc1	14	0.31	4.85387	4.54387	6.86134	23	0.298319
CHEMBL112532	O(CCCC)c1ccc(-n2ccnc2)cc1	0.007	3.71	8.1549	4.4449	11.5276	16	0.720476
CHEMBL1672629	Fc1cncc(F)c1-c1ncc(nc1-c1cccnc1)NC(=O)C1CC1	1	1.57	6	4.43	8.48149	26	0.326211
CHEMBL359657	s1c(ccc1CN)-c1cccnc1	2	1.38	5.69897	4.31897	8.05596	13	0.619689
CHEMBL345544	O(CCCC)c1ccc(-n2ncnc2)cc1	0.068	2.85	7.16749	4.31749	10.1318	16	0.63324
CHEMBL2419518	S(=O)(=O)(c1ccc(cc1)CNC(=O)N1Cc2c(C1)cncc2)c1cn(nc1)C(C)C	6.2	0.91	5.20761	4.29761	7.36138	30	0.245379
CHEMBL227855	O1C2(OOC13CCC(CC3)CN)C1CC3CC2CC(C1)C3	0.11	2.77	6.95861	4.18861	9.83656	21	0.468408
CHEMBL231306	Clc1cc(ccc1)C(O)CNC=1C=CNC(=O)C=1c1[nH]c2c(n1)c(cc(-n1ccnc1)c2)C	0.026	3.41	7.58503	4.17503	10.7221	33	0.324911
CHEMBL364713	O1[C@@H](c2c(c(OC)c(OC)cc2)C1=O)[C@@H]1N(CCc2c1c(OC)c1OCOc1c2)C	0.4003	2.27	6.39761	4.12761	9.04355	30	0.301452
CHEMBL2069804	o1c(nnc1-c1ccncc1)C1CCCCC1	1.3	1.78	5.88606	4.10606	8.32042	17	0.489436
CHEMBL456807	N(N)c1ccccc1	5	1.26	5.30103	4.04103	7.49344	8	0.93668
CHEMBL1179	N[C@@H]1C[C@H]1c1ccccc1	3.04	1.48	5.51713	4.03713	7.79891	10	0.779891
CHEMBL257990	N[C@H]1C[C@@H]1c1ccccc1	3.04	1.48	5.51713	4.03713	7.79891	10	0.779891
CHEMBL2019024	S(Cc1ncccc1)c1[nH]c2c(n1)cc(cc2)C	0.05	3.27	7.30103	4.03103	10.3206	18	0.573367
CHEMBL313833	NC1CC1c1ccccc1	3.1	1.48	5.50864	4.02864	7.78691	10	0.778691
CHEMBL1373	S(=O)(C(c1ccccc1)c1ccccc1)CC(=O)N	11	0.94	4.95861	4.01861	7.0094	19	0.368916
CHEMBL2170618	FC(F)(F)c1cc(ccc1C1CCN(CC1)C(=O)c1n(cnc1)C)C(=O)NC(N)=N	15	0.86	4.82391	3.96391	6.81899	30	0.2273
CHEMBL2170617	FC(F)(F)c1cc(ccc1C1CCN(CC1)C(=O)c1nccn1C)C(=O)NC(N)=N	16	0.86	4.79588	3.93588	6.77937	30	0.225979
CHEMBL2419505	S(=O)(=O)(c1ccc(cc1)CNC(=O)N1Cc2c(C1)cncc2)c1ccccc1	3.7	1.53	5.4318	3.9018	7.67829	28	0.274225
CHEMBL2170607	FC(F)(F)c1cc(ccc1C1CCN(CC1)C(=O)C1CC1)C(=O)NC(N)=N	5	1.42	5.30103	3.88103	7.49344	27	0.277535
CHEMBL2036225	S(=O)(=O)(C)c1ccc(cc1)CN(C(=O)Cc1ccccc1)c1cc(cc(F)c1)-c1[nH]nnn1	0.17	2.89	6.76955	3.87955	9.56931	33	0.289979
CHEMBL270666	O(C[C@@H](n1nnnc1[C@H](NC(=O)C(N)(C)C)COCc1ccccc1)CC#N)c1ccccc1O	42	0.5	4.37675	3.87675	6.18689	35	0.176768
CHEMBL480	S(=O)(Cc1nccc(OCC(F)(F)F)c1C)c1[nH]c2c(n1)cccc2	0.3367	2.6	6.47276	3.87276	9.14977	25	0.365991
CHEMBL61	O1C[C@H]2[C@@H]([C@@H](c3c(cc4OCOc4c3)[C@@H]2O)c2cc(OC)c(OC)c(OC)c2)C1=O	5	1.44	5.30103	3.86103	7.49344	30	0.249781
CHEMBL1098230	S(CCc1nc[nH]c1)c1ccc(cc1)C(C)(C)C	0.0085	4.22	8.07058	3.85058	11.4084	18	0.633801
CHEMBL271876	O(C[C@@H](n1nnnc1[C@H](NC(=O)C(N)(C)C)COCc1ccccc1)CC#N)c1ncccc1	33	0.64	4.48149	3.84149	6.33495	34	0.186322
CHEMBL2170608	FC(F)(F)c1cc(ccc1C1CCN(CC1)C(=O)COC)C(=O)NC(N)=N	8	1.3	5.09691	3.79691	7.2049	27	0.266848
CHEMBL178090	o1c(ccc1CN)-c1cccnc1	22	0.87	4.65758	3.78758	6.58386	13	0.506451
CHEMBL1801172	S(=O)(=O)(NC1[C@H]2[C@@H]1CN(C2)c1ncc(cn1)C(=O)NO)c1cc2c(cc1)cccc2	10	1.28	5	3.72	7.06791	30	0.235597
CHEMBL1243367	S(CC(c1ccncc1)c1nc[nH]c1)c1ccc(cc1)C(F)(F)F	0.055	3.55	7.25964	3.70964	10.2621	24	0.427587
CHEMBL2105423	FC(F)(F)c1cc(ccc1N1CCN(CC1)C(=O)c1[nH]ccc1)C(=O)NC(N)=N	9	1.39	5.04576	3.65576	7.13259	29	0.245951
CHEMBL267865	ON\C=N\c1ccc(cc1C)CCCC	0.272	2.97	6.56543	3.59543	9.28077	15	0.618718
CHEMBL2070948	s1c(cnc1N1CCN(CC1)C(=O)[C@@H]1CCCC[C@H]1C(=O)NC1(CC1)C#N)C(C#N)(C)C	10	1.43	5	3.57	7.06791	32	0.220872
CHEMBL348263	O(CCCC)c1ccc(N\C=N/O)cc1	0.27	3	6.56864	3.56864	9.2853	15	0.61902
CHEMBL178516	[nH]1cc(nc1)-c1cccnc1	53.5	0.73	4.27165	3.54165	6.03832	11	0.548938
CHEMBL2036210	Fc1cc(cc(N(Cc2ccc(cc2)C(F)(F)F)C(=O)CC)c1)-c1[nH]nnn1	0.038	3.92	7.42022	3.50022	10.4891	28	0.37461
CHEMBL270996	Fc1c2cc([nH]c2ccc1OC1=NC=Nn2c1c(C)c(OC[C@H](OC(=O)CN)C)c2)C	0.16	3.31	6.79588	3.48588	9.60653	31	0.309888
CHEMBL178711	s1c(ccc1CNCc1sc(cc1)-c1cccnc1)-c1cccnc1	0.21	3.24	6.67778	3.43778	9.43959	25	0.377583
CHEMBL583867	O=C(C(=O)N1CCN(C[C@H]1C)C(=O)c1ccccc1)c1c2c([nH]c1)cncc2	7.2	1.72	5.14267	3.42267	7.26958	28	0.259628
CHEMBL2113179	Clc1ccc(N(S(=O)(=O)c2ccc(cc2)CCCO)CC(=O)N\N=C/2\c3c(NC\2=O)cccc3)cc1	0.05	3.92	7.30103	3.38103	10.3206	36	0.286683
CHEMBL2170609	FC(F)(F)c1cc(ccc1C1CCN(CC1)C(=O)CC)C(=O)NC(N)=N	18	1.37	4.74473	3.37473	6.70706	26	0.257964
CHEMBL3084776	o1c2c(nc1N1[C@H](CNC[C@@H]1C)C)c(ccc2)C(=O)NC1C[C@@H]2N([C@H](C1)CCC2)C	1.4	2.48	5.85387	3.37387	8.27492	30	0.275831
CHEMBL150278	O(CCCC)c1ccc(cc1)-c1nn[nH]n1	0.316	3.15	6.50031	3.35031	9.18872	16	0.574295
CHEMBL2069803	o1nc(nc1C1CCCCC1)-c1ccncc1	1.2	2.58	5.92082	3.34082	8.36956	17	0.492327
CHEMBL325429	O(CCN(C)C)c1ccc(-n2ccnc2)cc1	2.96	2.22	5.52871	3.30871	7.81528	17	0.459722
CHEMBL63560	S(=O)(=O)(C[C@](O)(C(=O)Nc1cc(C(F)(F)F)c(cc1)C#N)C)c1ccc(F)cc1	1	2.71	6	3.29	8.48149	29	0.292465
CHEMBL179529	s1c(ccc1NC)-c1cccnc1	3.2	2.21	5.49485	3.28485	7.76742	13	0.597494
CHEMBL442078	O=C(C(=O)N1CCN(C[C@H]1C)C(=O)c1ccccc1)c1c2cccnc2[nH]c1	10	1.72	5	3.28	7.06791	28	0.252425
CHEMBL2036213	Fc1cc(cc(N(Cc2ccc(OC(F)(F)F)cc2)C(=O)CC)c1)-c1[nH]nnn1	0.051	4.07	7.29243	3.22243	10.3084	29	0.355464
CHEMBL1796298	O(c1ccc(cc1)C#C[C@@]1(O)C2CCN(C1)CC2)c1ccc(cc1)C(=O)NCc1ncncc1	7.94328	1.88	5.1	3.22	7.20927	34	0.212037
CHEMBL1825089	S(=O)(=O)(N(CCN1CCOCC1)c1ccc(Nc2nc3n(ncc3cn2)C2CCCCCC2)cc1)C	0.03	4.33	7.52288	3.19288	10.6342	36	0.295394
CHEMBL177756	O1C2=CC(=O)C=CC2=C(c2c1cc(O)cc2)c1ccccc1C(O)=O	0.9074	2.85	6.0422	3.1922	8.54114	25	0.341646
CHEMBL361364	n1cn(cc1-c1cccnc1)CC	46.4	1.2	4.33348	3.13348	6.12573	13	0.47121
CHEMBL2207081	Clc1cc(S(=O)(=O)Nc2cc(Cl)ccc2Cn2nncc2)ccc1Cl	0.19953	3.57	6.69999	3.12999	9.47098	25	0.378839
CHEMBL10	S(=O)(C)c1ccc(cc1)-c1[nH]c(c(n1)-c1ccc(F)cc1)-c1ccncc1	0.8	2.99	6.09691	3.10691	8.61848	27	0.319203
CHEMBL1209617	o1nc(nc1CCC1CCCC1)-c1ccc(cc1)[C@@H](NC(=O)[C@H]1NCC[C@@H]1O)C	1.4	2.75	5.85387	3.10387	8.27492	29	0.285342
CHEMBL559581	Clc1cc(N(C(C)c2oc(nn2)C)Cc2ccccc2Cl)ccc1C#N	0.091	3.96	7.04096	3.08096	9.95297	26	0.382806
CHEMBL2036217	Fc1cc(cc(N(Cc2cc(O)ccc2)C(=O)CC)c1)-c1[nH]nnn1	3.7	2.37	5.4318	3.0618	7.67829	25	0.307132
CHEMBL220862	Fc1ccc(cc1)-c1c(-c2ccncc2)c(n(C)c1C#N)N1CCN(CC1)C(=O)C	8	2.04	5.09691	3.05691	7.2049	30	0.240163
CHEMBL585498	O=C(C(=O)N1CCN(C[C@H]1C)C(=O)c1ccccc1)c1c2c([nH]c1)ccnc2	17	1.72	4.76955	3.04955	6.74215	28	0.240791
CHEMBL2158293	O=C(Nc1ccc(cc1C=1CCCCC=1)C1CCN(CC1)C(=O)Cc1nc[nH]c1)c1[nH]cc(n1)C#N	0.81	3.05	6.09152	3.04151	8.61085	36	0.23919
CHEMBL2170637	FC(F)(F)c1cc(ccc1C1CCN(CC1)C(=O)c1ncccc1)C(=O)NC(N)=N	26	1.56	4.58503	3.02503	6.48131	30	0.216044
CHEMBL2407749	O=C/1Nc2c(cccc2)\C\1=C/c1cc2[nH]nc(c2cc1)\C=C\c1ccncc1	0.13	3.89	6.88606	2.99606	9.734	28	0.347643
CHEMBL2170638	FC(F)(F)c1cc(ccc1C1CCN(CC1)C(=O)c1ccc(cc1)C(=O)N)C(=O)NC(N)=N	28	1.56	4.55284	2.99284	6.43581	33	0.195025
CHEMBL710	O=C1N[C@@H]2CC[C@H]3[C@@H]4CC[C@H](C(=O)NC(C)(C)C)[C@]4(CC[C@@H]3[C@]2(C=C1)C)C	1	3.01	6	2.99	8.48149	27	0.314129
CHEMBL207071	s1c(cc(N)c1C(=O)N)-c1ccc(F)cc1	4	2.45	5.39794	2.94794	7.63043	16	0.476902
CHEMBL1801238	Clc1ccc(cc1)CNC1[C@H]2[C@@H]1CN(C2)c1ncc(cn1)C(=O)NO	50	1.39	4.30103	2.91103	6.07986	25	0.243194
CHEMBL567376	O1OC2(CC1(CC(=O)NCc1ccccc1N)C)CCCCC2	3.8	2.51	5.42022	2.91022	7.66192	23	0.333127
CHEMBL114555	O(CCN1CCN(CC1)C(OCC)=O)c1ccc(-n2ccnc2)cc1	0.469	3.43	6.32883	2.89883	8.94631	25	0.357852
CHEMBL485549	o1c(ccc1[N+](=O)[O-])\C=N\NC(=O)c1cc([N+](=O)[O-])cc([N+](=O)[O-])c1O	5	2.41	5.30103	2.89103	7.49344	26	0.288209
CHEMBL2170630	FC(F)(F)c1cc(ccc1C1CCN(CC1)C(=O)c1cc(ccc1)C#N)C(=O)NC(N)=N	7	2.27	5.1549	2.8849	7.28687	32	0.227715
CHEMBL331431	S(=O)(=O)(N(CCCO)c1n(ncc1)-c1ccccc1)c1ccc(cc1)CCN	10	2.14	5	2.86	7.06791	28	0.252425
CHEMBL567570	O=C(C(=O)N1CCN(C[C@H]1C)C(=O)c1ccccc1)c1c2c([nH]c1)cccc2	2.6	2.73	5.58503	2.85503	7.89489	28	0.28196
CHEMBL1276654	Fc1c2CCC3(Oc2ccc1)CCN(CC3)c1nnc(cc1)-c1oc(nn1)Cc1cccnc1	14	2.02	4.85387	2.83387	6.86134	34	0.201804
CHEMBL1956397	Clc1ccc(cc1)-c1ccccc1CS(=O)CC(=O)N	19	1.89	4.72125	2.83125	6.67387	20	0.333693
CHEMBL551784	Clc1cc(N(C(C)c2nnn(c2)C)Cc2ccccc2Cl)ccc1C#N	0.04	4.57	7.39794	2.82794	10.4576	26	0.402215
CHEMBL371409	Clc1cc(C=2c3cc(ccc3N(CC(=O)N)C(=O)C=2CCO)C(F)(F)F)c(O)cc1	8.2	2.27	5.08619	2.81619	7.18974	30	0.239658
CHEMBL2170605	FC(F)(F)c1cc(ccc1C1CCN(CC1)C(=O)C(C)(C)C)C(=O)NC(N)=N	13	2.08	4.88606	2.80606	6.90684	28	0.246673
CHEMBL104	Clc1ccccc1C(n1ccnc1)(c1ccccc1)c1ccccc1	0.016	5	7.79588	2.79588	11.0201	25	0.440804
CHEMBL2036222	S(=O)(=O)(C)c1ccc(cc1)CN(C(=O)CC(C)C)c1cc(cc(F)c1)-c1[nH]nnn1	7.5	2.33	5.12494	2.79494	7.24452	30	0.241484
CHEMBL2079587	O[C@]1(CC[C@H]2[C@H]3[C@H](CC[C@]12C)[C@@]1([C@H](Cc2n[nH]cc2C1)CC3)C)C	0.048	4.56	7.31876	2.75876	10.3457	24	0.431069
CHEMBL998	Clc1cc2c(cc1)C(c1ncccc1CC2)=C1CCN(CC1)C(OCC)=O	0.016	5.05	7.79588	2.74588	11.0201	27	0.408152
CHEMBL178780	n1cn(cc1-c1cccnc1)Cc1ccccc1	12.1	2.19	4.91721	2.72721	6.95088	18	0.38616
CHEMBL3289811	Clc1cc(ccc1C(O)Cn1c2nc(OC3CCOC3)ccc2nc1N)C(F)(F)F	0.78	3.39	6.10791	2.71791	8.63402	30	0.287801
CHEMBL2036017	O(C)c1ccc(cc1)CN(C(=O)CCCC)c1cc(ccc1)-c1[nH]nnn1	0.26	3.87	6.58503	2.71503	9.30847	27	0.344758
CHEMBL513491	Clc1cc(F)ccc1COc1ccc(Cl)cc1Cc1nc(ccc1)C(=O)[O-].[Na+]	28	1.85	4.55284	2.70284	6.43581	28	0.22985
CHEMBL1075735	O1c2cc(OC)ccc2C=C(C(=O)CCC)C1=O	10	2.3	5	2.7	7.06791	18	0.392662
CHEMBL165	Oc1cc(cc(O)c1)\C=C\c1ccc(O)cc1	3	2.83	5.52288	2.69288	7.80704	17	0.459238
CHEMBL1393	S(C(=O)C)[C@H]1[C@H]2[C@@H]3CC[C@]4(OC(=O)CC4)[C@]3(CC[C@@H]2[C@@]2(C(=CC(=O)CC2)C1)C)C	3	2.84	5.52288	2.68288	7.80704	29	0.269208
CHEMBL375955	Clc1cc(Nc2nc(C(F)(F)F)c(cn2)C(=O)NCc2ccncc2)ccc1	1.9	3.04	5.72125	2.68125	8.08745	28	0.288837
CHEMBL252556	O(C)C=1C(=O)C(CCCCCCCCCCO)=C(C)C(=O)C=1OC	0.8	3.42	6.09691	2.67691	8.61848	24	0.359103
CHEMBL2170642	FC(F)(F)c1cc(ccc1C1CCN(CC1)C(=O)c1ccccc1)C(=O)NC(N)=N	5	2.66	5.30103	2.64103	7.49344	30	0.249781
CHEMBL1270269	FC(F)(F)c1cc(ccc1)-c1nc(nc(c1)CCCNC(C(=O)N)(C)C)C#N	35	1.82	4.45593	2.63593	6.29882	28	0.224958
CHEMBL475684	Clc1cc(-n2nc(cc2)C)ccc1C(=O)N1CCC(F)(F)/C(/c2c1cccc2)=C/C(=O)NCc1nnccc1	7	2.52	5.1549	2.6349	7.28687	39	0.186843
CHEMBL2036223	S(=O)(=O)(C)c1ccc(cc1)CN(C(=O)C1CCCC1)c1cc(cc(F)c1)-c1[nH]nnn1	12	2.34	4.92082	2.58082	6.95598	31	0.224386
CHEMBL60889	Clc1cc(C(=O)NCC2OCCN(C2)Cc2ccc(F)cc2)c(OCC)cc1N	1	3.44	6	2.56	8.48149	29	0.292465
CHEMBL2170629	FC(F)(F)c1cc(ccc1C1CCN(CC1)C(=O)c1ccc(cc1)C#N)C(=O)NC(N)=N	15	2.27	4.82391	2.55391	6.81899	32	0.213093
CHEMBL193647	Clc1cc(C=2c3cc(ccc3N(Cc3nn[nH]n3)C(=O)C=2CCO)C(F)(F)F)c(O)cc1	12	2.38	4.92082	2.54082	6.95598	32	0.217374
CHEMBL2158288	OCCNCC(=O)N1CCC(CC1)c1cc(C=2CCCCC=2)c(NC(=O)c2[nH]cc(n2)C#N)cc1	7.7	2.58	5.11351	2.53351	7.22836	35	0.206525
CHEMBL3289805	Clc1c(cccc1Cl)C(O)Cn1c2ncccc2nc1N	10.2	2.46	4.9914	2.5314	7.05575	21	0.335988
CHEMBL2170631	FC(F)(F)c1cc(ccc1C1CCN(CC1)C(=O)c1ccccc1C#N)C(=O)NC(N)=N	16	2.27	4.79588	2.52588	6.77937	32	0.211855
CHEMBL151038	o1ncc(C)c1-c1ccc(OCCCC)cc1	0.48	3.8	6.31876	2.51876	8.93208	17	0.525416
CHEMBL585487	O=C(C(=O)N1CCN(C[C@H]1C)C(=O)c1ccccc1)c1c2ncccc2[nH]c1	36	1.93	4.4437	2.5137	6.28153	28	0.22434
CHEMBL894	Clc1cc(ccc1)C(=O)C(NC(C)(C)C)C	1.9983	3.21	5.69934	2.48934	8.05648	16	0.50353
CHEMBL1214337	S(=O)(=O)(NC1Cc2cc(ccc2C1)-c1cccnc1F)C(C)C	9	2.57	5.04576	2.47576	7.13259	23	0.310113
CHEMBL222460	Clc1cc(C=2c3cc(ccc3NC(=O)C=2CCO)C(F)(F)F)c(O)cc1	5.2	2.82	5.284	2.464	7.46936	26	0.287283
CHEMBL151207	O(CCCC)c1ccc(-n2cc(nc2)C)cc1	0.36	3.98	6.4437	2.4637	9.10869	17	0.535805
CHEMBL1290746	Fc1ccccc1-n1ncc(C(=O)Nc2cc(ccc2C)C(=O)Nc2nocc2)c1N	23	2.19	4.63827	2.44827	6.55658	31	0.211502
CHEMBL114297	O(CCCN(C)C)c1ccc(-n2ccnc2)cc1	9.7	2.57	5.01323	2.44323	7.08661	18	0.3937
CHEMBL610795	Clc1cc(ccc1Cl)[C@]12[C@H](CNC1)[C@H]2COCC1CC1	3	3.08	5.52288	2.44288	7.80704	20	0.390352
CHEMBL570867	o1c2c(cc1C)cc(N\C(=N/C(=O)c1ccc(nc1)C(=O)N(C)C)\N[C@H]1CCCCN(CC(=O)N3CCCC3)C1=O)cc2	40	1.97	4.39794	2.42794	6.21685	43	0.144578
CHEMBL2415098	FC(F)(F)c1ccccc1[C@@H]1OCCn2nc(nc12)-c1cc(OC)c(-n2cc(nc2)C)cc1	1.52	3.4	5.81816	2.41816	8.22444	33	0.249225
CHEMBL2158287	OC[C@@H](O)C(=O)N1CCC(CC1)c1cc(C=2CCCCC=2)c(NC(=O)c2[nH]cc(n2)C#N)cc1	9.8	2.6	5.00877	2.40877	7.08031	34	0.208244
CHEMBL462093	O=C1CCc2cc(ccc2C1)-c1cccnc1	41.5	1.99	4.38195	2.39195	6.19425	17	0.364367
CHEMBL478283	Clc1cc(-n2nc(cc2)C)ccc1C(=O)N1CCC(F)(F)/C(/c2c1cccc2)=C/C(=O)NCCO	5.5	2.87	5.25964	2.38964	7.43493	35	0.212426
CHEMBL3086078	S(=O)(=O)(Nc1cccc(CC=2C(Oc3c(cc(F)c(OC(=O)N(C)C)c3)C=2C)=O)c1F)N	36	2.06	4.4437	2.3837	6.28153	32	0.196298
CHEMBL3287238	Clc1cc(OCCCF)ccc1-c1cnc(nc1)COc1ncccc1C(=O)N	18	2.37	4.74473	2.37473	6.70706	29	0.231278
CHEMBL2103774	O=C1CC=2C[C@H]([C@H]3[C@@H]4CC[C@@](O)(C#C)[C@]4(CC[C@@H]3C=2CC1)C)C	3	3.15	5.52288	2.37288	7.80704	23	0.339436
CHEMBL401930	Clc1cc(ccc1)[C@@H](O)CNC=1C=CNC(=O)C=1c1[nH]c2c(n1)c(cc(N1CCOCC1)c2)C	2	3.34	5.69897	2.35897	8.05596	34	0.23694
CHEMBL437002	Fc1ccccc1C(=O)N1CCC(CC1)Cc1ccccc1	0.5	3.96	6.30103	2.34103	8.90702	22	0.404864
CHEMBL19224	O(C)c1cc(ccc1OC)Cc1nccc2c1cc(OC)c(OC)c2	0.762	3.78	6.11804	2.33805	8.64835	25	0.345934
CHEMBL2158301	O=C(Nc1ccc(cc1C=1CCCCC=1)C1CCN(CC1)C(=O)C(N)(C)C)c1[nH]cc(n1)C#N	2.2	3.33	5.65758	2.32758	7.99745	34	0.235219
CHEMBL1081957	S(CCCN1CC2(C(C2)C1)c1cc(ccc1)C(F)(F)F)c1nnc(n1C)-c1ocnc1C	5	2.98	5.30103	2.32103	7.49344	32	0.23417
CHEMBL1698322	Clc1cc(NC(=O)c2ncccc2)ccc1N1C(=O)C(CC1=O)c1ccccc1	17.6	2.45	4.75449	2.30449	6.72085	29	0.231754
CHEMBL121241	S(=O)(=O)(N(CCCO)c1n(ncc1)-c1ccccc1)c1ccc(cc1)CCCN	15	2.52	4.82391	2.30391	6.81899	29	0.235138
CHEMBL808	Clc1cc(Cl)ccc1C(OCc1ccc(Cl)cc1)Cn1ccnc1	0.04	5.1	7.39794	2.29794	10.4576	24	0.435733
CHEMBL365062	s1cccc1-c1nc(on1)-c1cc(cc(c1)C(=O)N)C(=O)N1CCC(CC1)c1cc(ccc1F)CN	9.69	2.72	5.01368	2.29368	7.08724	36	0.196868
CHEMBL2036203	O1CCOc2c1cc(cc2)CN(C(=O)CCCC)c1cc(ccc1)-c1[nH]nnn1	0.68	3.88	6.16749	2.28749	8.71825	29	0.300629
CHEMBL256712	O=C(Nc1ccc(cc1C=1CCCCC=1)C1CCN(CC1)C(=O)C)c1[nH]c(cn1)C#N	9.2	2.76	5.03621	2.27621	7.1191	31	0.229648
CHEMBL576093	o1c2c(cc1C)cc(N\C(=N\C(=O)c1ccc(nc1)C(=O)N)\N[C@H]1CCCCN(CC(=O)N3CCCC3)C1=O)cc2	13	2.61	4.88606	2.27606	6.90684	41	0.168459
CHEMBL517438	s1c2c(nc1Nc1ccc(cc1)[C@@H](n1ccnc1)[C@H](N(C)C)C)cccc2	0.35	4.19	6.45593	2.26593	9.12599	27	0.337999
CHEMBL552156	Clc1cc(N(C(C(C)C)c2nncn2C)Cc2ccccc2Cl)ccc1C#N	0.063	4.94	7.20066	2.26066	10.1787	28	0.363526
CHEMBL2036030	Fc1cc(cc(N(Cc2cc(OC(C)C)ccc2)C(=O)CC)c1)-c1[nH]nnn1	0.9	3.8	6.04576	2.24576	8.54617	28	0.30522
CHEMBL3260741	Clc1ccc(cc1)C=1C=2N(N(Cc3ccc(nc3C)C(F)(F)F)C(=O)C=1c1ccncc1)C(=O)N(N=2)C	0.7	3.92	6.1549	2.2349	8.70045	37	0.235147
CHEMBL467114	Clc1cc(Cc2nc(ccc2)C(=O)[O-])c(OCc2ccc(Cl)cc2F)cc1.[Na+]	85	1.85	4.07058	2.22058	5.7541	28	0.205503
CHEMBL179398	s1c(ccc1C=O)-c1cccnc1	65.2	1.97	4.18575	2.21575	5.9169	13	0.455146
CHEMBL512127	S(=O)(=O)(C)c1ccccc1C(=O)N(CC(O)(CNC(=O)c1cnn(c1N)-c1ccc(F)cc1)C(F)(F)F)CC	87	1.85	4.06048	2.21048	5.73982	39	0.147175
CHEMBL1909987	Clc1cc(Cl)ccc1-c1c2c(nc(C)c1CN)CN(C2)Cc1ccccc1	0.34	4.26	6.46852	2.20852	9.14378	27	0.338659
CHEMBL362702	s1c(ccc1C(=O)C)-c1cccnc1	62.7	2	4.20273	2.20273	5.9409	14	0.42435
CHEMBL481322	Clc1ccc2c(CC[C@H]2c2[nH]ccn2)c1COC	5.7	3.05	5.24413	2.19413	7.413	18	0.411833
CHEMBL1210614	S(CCCN1CC2(C(C2)C1)c1cc(S(F)(F)(F)(F)F)ccc1)c1nnc(n1C)-c1ocnc1C	3	3.33	5.52288	2.19288	7.80704	34	0.229619
CHEMBL178534	s1c(ccc1\C=N\O)-c1cccnc1	37.2	2.24	4.42946	2.18946	6.2614	14	0.447243
CHEMBL179704	s1cc(-c2cccnc2)c(c1)C	24.9	2.42	4.6038	2.1838	6.50785	12	0.542321
CHEMBL1671918	s1ccnc1NC(=O)c1ccc(NC(=O)CCC)cc1	36	2.26	4.4437	2.1837	6.28153	20	0.314076
CHEMBL577965	o1c2c(cc1C)cc(N\C(=N\C(=O)c1cc(cnc1)C(=O)N)\N[C@H]1CCCCN(CC(=O)N3CCCC3)C1=O)cc2	37	2.26	4.4318	2.1718	6.26471	41	0.152798
CHEMBL258046	Fc1cc(F)c(NC2=NC=Nn3c2c(C(C)C)c(c3)-c2oc(OC3CCNCC3)nn2)cc1C(=O)NC1CC1	38	2.25	4.42022	2.17022	6.24834	39	0.160214
CHEMBL229861	Clc1c(C)c(N2[C@H]([C@H]3N(CC[C@@H]3O)C2=O)CC)ccc1C#N	7.6	2.95	5.11919	2.16919	7.23639	22	0.328927
CHEMBL1909048	Clc1ccccc1C(=O)N1CCC(CC1)Cc1ccccc1	0.2	4.53	6.69897	2.16897	9.46954	22	0.430434
CHEMBL1201146	O=C1CC[C@@H]2[C@@H]3[C@H]([C@@H]4CC[C@@](OC(=O)C)(C#C)[C@]4(CC3)C)CCC2=C1	0.8	3.93	6.09691	2.16691	8.61848	25	0.344739
CHEMBL2035185	O1Cc2cc(Nc3nc(-c4oc(COC\C=C\C1)cc4)ccn3)ccc2OCCN1CCCC1	1.4	3.69	5.85387	2.16387	8.27492	34	0.24338
CHEMBL590600	FC(F)(F)Oc1ccc(NC(=O)N2CCC(n3cccc3)CC2)cc1	8	2.95	5.09691	2.14691	7.2049	25	0.288196
CHEMBL478402	S(=O)(=O)(N)c1cc(Nc2nc(N(C)c3cc4nn(cc4cc3)C)ccn2)ccc1	9.2	2.89	5.03621	2.14621	7.1191	29	0.245486
CHEMBL1909049	O(C)c1ccccc1C(=O)N1CCC(CC1)Cc1ccccc1	0.8	3.96	6.09691	2.13691	8.61848	23	0.374716
CHEMBL358214	O(CCCC)c1ccc(-n2ccnc2C)cc1	0.77	3.98	6.11351	2.13351	8.64194	17	0.50835
CHEMBL1585484	Clc1cc(ccc1)CSc1[nH]c2c(n1)cc(S(=O)(=O)N1CCOCC1)cc2	0.4	4.27	6.39794	2.12794	9.04401	27	0.334963
CHEMBL578579	O1OC2(CC1(CC(=O)NCc1ccc(N3CCOCC3)cc1)C)CCCCC2	4.4	3.24	5.35655	2.11655	7.57192	28	0.270426
CHEMBL2019026	S(Cc1ncccc1)c1[nH]c2c(n1)cc(N)cc2	50	2.22	4.30103	2.08103	6.07986	18	0.33777
CHEMBL1209686	o1nc(nc1CCC1CCCCC1)-c1ccc(cc1)[C@@H](NC(=O)[C@H]1NCC[C@@H]1O)CC	1.2	3.84	5.92082	2.08082	8.36956	31	0.269986
CHEMBL575966	Clc1ccccc1-c1noc(C)c1C(=O)N(C)c1ccc(Cl)cc1	0.31623	4.42	6.5	2.08	9.18827	24	0.382845
CHEMBL2170643	Fc1ccc(cc1)C(=O)N1CCC(CC1)c1ccc(cc1C(F)(F)F)C(=O)NC(N)=N	11	2.88	4.95861	2.07861	7.0094	31	0.22611
CHEMBL2205775	O(C(=O)C(C(n1ncnc1)c1ccc(Nc2ccccc2)cc1)(C)C)C	4.2	3.3	5.37675	2.07675	7.60047	26	0.292326
CHEMBL179669	s1ccc(C)c1-c1cccnc1	20.1	2.63	4.6968	2.0668	6.63931	12	0.553276
CHEMBL2207099	Clc1cc(S(=O)(=O)Nc2cc(Cl)cnc2Cc2nnnn2C)ccc1Cl	25.1189	2.54	4.6	2.06	6.50247	26	0.250095
CHEMBL1649675	FC(F)(F)c1nn(c2c1CCCC2)-c1ccc(cc1)CC(=O)C	2	3.64	5.69897	2.05897	8.05596	23	0.350259
CHEMBL408444	Fc1c2cc([nH]c2ccc1OC1=NC=Nn2c1c(C)c(OC[C@H](OC(=O)[C@@H](N)C)C)c2)C	2.1	3.62	5.67778	2.05778	8.026	32	0.250813
CHEMBL1172744	O(C[C@]12C[C@]1(CCNC2)c1cc2c(cc1)cccc2)C	8	3.06	5.09691	2.03691	7.2049	20	0.360245
CHEMBL270193	Fc1cc(F)c(NC2=NC=Nn3c2c(C(C)C)c(c3)-c2oc(nn2)NCCCCN)cc1C(=O)NC1CC1	23	2.61	4.63827	2.02827	6.55658	38	0.172541
CHEMBL3215861	Cl.Cl.O=C(NO)\C=C\c1cc2nc(n(c2cc1)CCN(CC)CC)CCCC	5.78	3.21	5.23807	2.02807	7.40444	28	0.264444
CHEMBL456390	O=C1Nc2c(cc(cc2)-c2c3c(cccc3)cnc2)CC1	9.2	3.03	5.03621	2.00621	7.1191	21	0.339005
CHEMBL576094	o1c2c(cc1C)cc(N\C(=N/C(=O)c1ccc(nc1)C(=O)NC)\N[C@H]1CCCCN(CC(=O)N3CCCC3)C1=O)cc2	12	2.93	4.92082	1.99082	6.95598	42	0.165619
CHEMBL91	Clc1cc(Cl)ccc1C(OCc1ccc(Cl)cc1Cl)Cn1ccnc1	0.016	5.81	7.79588	1.98588	11.0201	25	0.440804
CHEMBL477611	S(=O)(=O)(N)c1cc(Nc2nc(N(C)c3cc4[nH]nc(c4cc3)C)ccn2)ccc1	7.2	3.16	5.14267	1.98267	7.26958	29	0.250675
CHEMBL1909050	O=C(N1CCC(CC1)Cc1ccccc1)c1ccccc1C	0.6	4.24	6.22185	1.98185	8.79509	22	0.399777
CHEMBL192530	O(CCc1cc2c(nc1)N(c1ncccc1N(C)C2=O)CC)c1ccc(cc1C)C(O)=O	2	3.73	5.69897	1.96897	8.05596	32	0.251749
CHEMBL568444	O1OC2(CC1(CC(=O)NCc1ccc([N+](=O)[O-])cc1)C)CCCCC2	3.2	3.53	5.49485	1.96485	7.76742	25	0.310697
CHEMBL151449	o1nccc1-c1cc(OCCCC)ccc1	1.63	3.83	5.78781	1.95781	8.18154	16	0.511347
CHEMBL409494	Fc1ccccc1NC(=O)CCN1CCC(CC1)c1ccc(cc1)C(=O)Nc1ccccc1N	10	3.06	5	1.94	7.06791	34	0.20788
CHEMBL1650654	Oc1ccc2c(ccc(c2)-c2cc(O)ccc2)c1-c1cc(N)ccc1	0.68	4.23	6.16749	1.93749	8.71825	25	0.34873
CHEMBL499007	O(C)c1cc(cnc1)-c1cc2CCC(=O)Cc2cc1	45.4	2.41	4.34294	1.93294	6.1391	19	0.323111
CHEMBL579199	O1OC2(CC1(CC(=O)NCc1cc(OC)cc(OC)c1)C)CCCCC2	1.9	3.79	5.72125	1.93125	8.08745	26	0.311056
CHEMBL1917511	s1cc(nc1NC(=O)c1n(nc(c1)C(C)(C)C)Cc1ccccc1)CN	15	2.9	4.82391	1.92391	6.81899	26	0.262269
CHEMBL3115191	s1cncc1COC(=O)N[C@@H](Cc1ccccc1)CC[C@@H](NC(=O)[C@@H](NC(=O)N(Cc1nc(sc1)C(C)C)C)Cc1nc[nH]c1)Cc1ccccc1	2.2	3.75	5.65758	1.90758	7.99745	52	0.153797
CHEMBL464245	Fc1cccc(F)c1C(=O)N(CC(O)(CNC(=O)c1cnn(c1N)-c1ccc(F)cc1)C(F)(F)F)CCF	8	3.19	5.09691	1.90691	7.2049	38	0.189603
CHEMBL3115180	s1cncc1COC(=O)N[C@@H](Cc1ccccc1)CC[C@@H](NC(=O)[C@H](NC(=O)N(Cc1nc(sc1)C(C)C)C)CCN1CCOCC1)Cc1ccccc1	1.3	3.98	5.88606	1.90606	8.32042	54	0.154082
CHEMBL1650645	Oc1ccc2c(ccc(c2)-c2cc(O)ccc2)c1-c1cccnc1	0.88	4.15	6.05552	1.90552	8.55997	24	0.356665
CHEMBL2018913	S(CCCO)c1[nH]c2c(n1)cc(OC)cc2	50	2.4	4.30103	1.90103	6.07986	16	0.379991
CHEMBL3260740	Clc1ccc(cc1)C=1C=2N(N(Cc3ccc(nc3)C(F)(F)F)C(=O)C=1c1ccncc1)C(=O)N(N=2)C	4.3	3.47	5.36653	1.89653	7.58603	36	0.210723
CHEMBL229008	Fc1cc2c(Nc3c(cccc3)C2=O)cc1C(=O)NC(C)(C)c1ccc(nc1)N1CCN(CC1)CC	19	2.83	4.72125	1.89125	6.67387	36	0.185385
CHEMBL562509	Clc1cc(N(C(CCC)c2nncn2C)Cc2ccccc2Cl)ccc1C#N	0.11	5.07	6.95861	1.88861	9.83656	28	0.351306
CHEMBL3115185	s1cncc1COC(=O)N[C@@H](Cc1ccccc1)CC[C@@H](NC(=O)[C@@H](NC(=O)N(Cc1nc(sc1)C(C)C)C)Cc1ncn(c1)C)Cc1ccccc1	2.2	3.77	5.65758	1.88758	7.99745	53	0.150895
CHEMBL2407899	O=C/1Nc2c(cccc2)\C\1=C/c1cc2[nH]nc(c2cc1)\C=C\c1ccc(nc1)N1CCN(CC1)C	0.44	4.47	6.35655	1.88655	8.9855	35	0.256729
CHEMBL565361	O1OC2(CC1(CC(=O)NCc1cc(OC)ccc1)C)CCCCC2	2.6	3.7	5.58503	1.88503	7.89489	24	0.328954
CHEMBL1794073	Cl.S(=O)(=O)(N)c1cc(Nc2nc(N(C)c3cc4n(nc(c4cc3)C)C)ccn2)ccc1	9.3	3.16	5.03152	1.87152	7.11246	31	0.229434
CHEMBL195561	Clc1cc(C=2c3cc(ccc3N(CC#N)C(=O)C=2CCO)C(F)(F)F)c(O)cc1	24	2.76	4.61979	1.85979	6.53045	29	0.225188
CHEMBL1242436	O1c2c(-n3c(C1)c(nc3)C(=O)N1CCC1)cccc2CCN1CCN(CC1)c1c2c(nc(cc2)C)ccc1	4	3.54	5.39794	1.85794	7.63043	38	0.200801
CHEMBL3289806	Clc1cc(ccc1C(O)Cn1c2nc(N3CCN(CC3)C)ccc2nc1N)C(F)(F)F	5	3.46	5.30103	1.84103	7.49344	31	0.241724
CHEMBL186730	s1cccc1-c1nc(on1)-c1cc(ccc1)C(=O)N1CCC(CC1)c1cc(ccc1F)CN	2.19	3.82	5.65956	1.83956	8.00024	33	0.242432
CHEMBL1277677	Clc1ccccc1N1NC=2C(=C(N(Cc3ccncc3)C(=O)C=2)CN(C)c2ccccc2)C1=O	6.5	3.35	5.18709	1.83709	7.33237	34	0.215658
CHEMBL2158297	O=C(Nc1ccc(cc1C=1CCCCC=1)C1CCN(CC1)C(=O)Cc1ccncc1)c1[nH]cc(n1)C#N	2.9	3.72	5.5376	1.8176	7.82785	37	0.211564
CHEMBL1173532	Clc1cc(ccc1Cl)[C@@]12C[C@@]1(CNCC2)COC	10	3.19	5	1.81	7.06791	18	0.392662
CHEMBL3287739	Fc1cc(C(=O)NC2CCC(NC(=O)c3nn(C)c(c3)C)CC2)c(Oc2cc(ccc2)-c2ccc(O)cc2CN2CCOCC2)nc1	6.30957	3.4	5.2	1.8	7.35062	47	0.156396
CHEMBL189942	Fc1nc2N(c3ncc(cc3C(=O)N(c2cc1)C)CCOc1ccc(cc1C)C(O)=O)CC	2	3.9	5.69897	1.79897	8.05596	33	0.24412
CHEMBL475534	O(C(=O)C=1C(C(C(OC)=O)=C(NC=1C)C)c1cc([N+](=O)[O-])ccc1)CC	3	3.73	5.52288	1.79288	7.80704	26	0.300271
CHEMBL1671916	s1ccnc1NC(=O)c1ccc(NC(=O)c2ccccc2C)cc1	23	2.85	4.63827	1.78827	6.55658	24	0.273191
CHEMBL151037	O(CCCC)c1ccc(cc1)-c1n(ncc1)C	1.97	3.92	5.70553	1.78553	8.06524	17	0.474426
CHEMBL833	Clc1ccccc1CN1CCc2sccc2C1	0.6678	4.39	6.17535	1.78535	8.72937	17	0.513492
CHEMBL556716	S(=O)(=O)(C)c1ccc(cc1)C(CCNC(=O)c1ccc(cc1)C#N)c1ccc(F)cc1	11	3.18	4.95861	1.77861	7.0094	31	0.22611
CHEMBL1830424	O=C(NO)\C=C\c1cc2nc(n(c2cc1)CCN(C)C)CCCCCC	10.3	3.21	4.98716	1.77716	7.04976	26	0.271145
CHEMBL1738699	OC(=O)CCc1n(c(cc1)-c1ccc(-n2ccnc2)cc1)-c1ccc(cc1C)C(=O)N	0.77	4.35	6.11351	1.76351	8.64194	31	0.278772
CHEMBL517933	Fc1cccc(F)c1C(=O)N(CC(O)(CNC(=O)c1cnn(c1N)-c1ccc(F)cc1)C(F)(F)F)CCO	40	2.64	4.39794	1.75794	6.21685	38	0.163601
CHEMBL2207100	Clc1cc(Cn2nncc2)c(NS(=O)(=O)c2sc(Cl)cc2)cc1Cl	10	3.25	5	1.75	7.06791	24	0.294496
CHEMBL3127501	S(=O)(=O)(c1cc(OC(F)(F)F)ccc1)c1ccc(NC(=O)[C@@H]2C[C@H]2c2cccnc2)cc1	2	3.95	5.69897	1.74897	8.05596	32	0.251749
CHEMBL425519	s1cc(-c2ccc(F)nc2)c(c1)C	40.9	2.64	4.38828	1.74828	6.20319	13	0.477168
CHEMBL3114719	s1cncc1COC(=O)N[C@@H](CC[C@@H](NC(=O)[C@@H](NC(=O)N(Cc1nc(sc1)C(C)C)C)C(C)C)CC)CC	7.8	3.36	5.10791	1.74791	7.22044	39	0.185139
CHEMBL2403225	Fc1cc(F)ccc1CN1c2c(cc(Oc3nccc(OC)c3C(F)(F)F)cc2)C(=O)N=C1	0.3	4.8	6.52288	1.72288	9.22062	33	0.279413
CHEMBL593763	Clc1cc(ccc1)COc1cc2OC(=O)C=C(c2cc1)CNC.S(O)(=O)(=O)C	5	3.59	5.30103	1.71103	7.49344	28	0.267623
CHEMBL2043240	Clc1cc(Oc2ccccc2CS(=O)CC(=O)N)ccc1Cl	20	2.99	4.69897	1.70897	6.64238	22	0.301926
CHEMBL584886	O1OC2(CC1(CC(=O)NCc1cc3OCCc3cc1)C)CCCCC2	2.9	3.84	5.5376	1.6976	7.82785	25	0.313114
CHEMBL590810	O=C(Nc1cc2c(CCNC2)cc1)c1cc(ccc1)CNC(=O)Nc1ccc(cc1)C#N	22	2.96	4.65758	1.69758	6.58386	32	0.205746
CHEMBL578588	O1OC2(CC1(CC(=O)NCc1ccc(N(C)C)cc1)C)CCCCC2	2.3	3.95	5.63827	1.68827	7.97016	25	0.318806
CHEMBL150146	O(CCCC)c1ccc(cc1)-c1nccnc1	7.86	3.42	5.10458	1.68458	7.21574	17	0.424455
CHEMBL564015	Clc1cc(N(C(C)c2nnnn2C(C)C)Cc2ccccc2Cl)ccc1C#N	0.08	5.43	7.09691	1.66691	10.0321	28	0.358288
CHEMBL578547	O1OC2(CC1(CC(=O)NCc1ccc(cc1)C(OC)=O)C)CCCCC2	3.9	3.75	5.40894	1.65894	7.64597	26	0.294076
CHEMBL390526	Fc1cc(Nc2nc(C(F)(F)F)c(cn2)C(=O)NCC2CCOCC2)cc(F)c1	91	2.39	4.04096	1.65096	5.71222	29	0.196973
CHEMBL3104250	Clc1cc(/C(=N\NC(=O)c2cc(S(=O)(=O)N3CCOCC3)ccc2)/C)c(O)cc1	9.76	3.36	5.01055	1.65055	7.08282	29	0.244235
CHEMBL1909051	FC(F)(F)c1ccccc1C(=O)N1CCC(CC1)Cc1ccccc1	0.4	4.75	6.39794	1.64794	9.04401	25	0.36176
CHEMBL113275	O(CCCCCCN(C)C)c1ccc(-n2ccnc2)cc1	6.22	3.56	5.20621	1.64621	7.3594	21	0.350448
CHEMBL2170747	s1c2cc(O)ccc2nc1NC(=O)c1c(F)c(O)ccc1F	54	2.64	4.26761	1.62761	6.03261	22	0.274209
CHEMBL1830397	O=C(NO)\C=C\c1cc2nc(n(c2cc1)CC(CN(C)C)(C)C)CC(C)(C)C	8.1	3.47	5.09152	1.62152	7.19727	28	0.257045
CHEMBL2158299	O1CCN(CC1)CC(=O)N1CCC(CC1)c1cc(C=2CCCCC=2)c(NC(=O)c2[nH]cc(n2)C#N)cc1	4.3	3.75	5.36653	1.61653	7.58603	37	0.205028
CHEMBL1813474	Clc1cc(ccc1Cl)[C@@]12[C@@H](CCC1)CNC2	1.9	4.11	5.72125	1.61125	8.08745	16	0.505465
CHEMBL433737	o1nc(cc1)-c1ccc(OCCCC)cc1	3.68	3.83	5.43415	1.60415	7.68162	16	0.480101
CHEMBL2017281	o1nc(C)c(-c2cc3ncc(C(=O)N)c(Nc4c5ncccc5ccc4)c3cc2OC)c1C	5.5	3.67	5.25964	1.58964	7.43493	33	0.225301
CHEMBL2158231	O=C(N1CCC(CC1)c1cc(C=2CCCCC=2)c(NC(=O)c2[nH]cc(n2)C#N)cc1)c1cccnc1	5.5	3.67	5.25964	1.58964	7.43493	36	0.206526
CHEMBL2407717	S1C[C@@H](N=C1NCc1ccc(cc1)C(=O)Nc1ccccc1N)c1ccccc1	32	2.91	4.49485	1.58485	6.35384	29	0.219098
CHEMBL576138	Clc1ccccc1-c1noc(C)c1C(=O)N(C)c1cc(Cl)c(cc1)C	0.31623	4.92	6.5	1.58	9.18827	25	0.367531
CHEMBL2022739	Fc1cc(NC(=O)c2ccccc2F)ccc1-c1oc(nn1)NCCCCN1CCOCC1	31	2.93	4.50864	1.57864	6.37333	33	0.193131
CHEMBL434317	O(CCCC)c1ccc(cc1)-c1[nH]ncc1C	3.1	3.93	5.50864	1.57864	7.78691	17	0.458053
CHEMBL150799	o1nccc1-c1ccccc1OCCCC	14.2	3.27	4.84771	1.57771	6.85263	16	0.42829
CHEMBL1668909	s1c2c(ccnc2)c(Nc2cc3c(cc2)/C(=N/O)/CC3)c1C(OCC)=O	0.129	5.34	6.88941	1.54941	9.73874	26	0.374567
CHEMBL110691	ClC=1C2=CC(=O)CC[C@@]2([C@@H]2[C@H]([C@@H]3CC[C@](OC(=O)C)(C(=O)C)[C@]3(CC2)C)C=1)C	3	3.98	5.52288	1.54288	7.80704	28	0.278823
CHEMBL528996	Clc1cc(-n2nc(cc2)C)ccc1C(=O)N1CCC(F)(F)/C(/c2c1cccc2)=C/C(=O)NCc1ncccc1	5.1	3.75	5.29243	1.54243	7.48128	39	0.191828
CHEMBL149750	O(CCCC)c1ccc(cc1)-c1n[nH]cc1	3.16	3.96	5.50031	1.54031	7.77514	16	0.485946
CHEMBL1794074	Cl.Cl.S(=O)(=O)(N)c1cc(Nc2nc(N(C)c3cc4nn(C)c(c4cc3)C)ccn2)ccc1	20	3.16	4.69897	1.53897	6.64238	32	0.207574
CHEMBL413	O1[C@@H](CC(=O)[C@@H](\C=C(/C)\[C@@H](O)[C@@H](OC)C(=O)[C@@H](C[C@@H](\C=C\C=C\C=C(/C)\[C@@H](OC)C[C@H]2O[C@](O)([C@@H](CC2)C)C(=O)C(=O)N2[C@@H](CCCC2)C1=O)C)C)C)[C@@H](C[C@H]1C[C@@H](OC)[C@H](O)CC1)C	4	3.86	5.39794	1.53794	7.63043	65	0.117391
CHEMBL1243333	S(CC(C1CCNCC1)c1nc[nH]c1)c1ccc(cc1)C(C)(C)C	1.4	4.32	5.85387	1.53387	8.27492	24	0.344789
CHEMBL2425952	O=C1N(CCc2ccccc2)C(=Nc2c1cccc2Cc1ccc(cc1)C(=O)NO)CC	3.3	3.95	5.48149	1.53149	7.74853	32	0.242141
CHEMBL1221	Clc1cc(Cl)ccc1C(SCc1ccc(Cl)cc1)Cn1ccnc1	0.016	6.27	7.79588	1.52588	11.0201	24	0.459171
CHEMBL478612	S(=O)(=O)(N)c1cc(Nc2nc(N(C)c3cc4n(C)c(nc4cc3)C)ccn2)ccc1	26	3.06	4.58503	1.52503	6.48131	30	0.216044
CHEMBL296580	S(Cc1ncccc1)c1[nH]c2c(n1)cccc2	50	2.78	4.30103	1.52103	6.07986	17	0.357639
CHEMBL589136	Clc1cc(Cl)ccc1CNC(=O)N1CCC(Oc2ncccn2)CC1	19	3.21	4.72125	1.51125	6.67387	25	0.266955
CHEMBL2019023	S(Cc1ncccc1)c1[nH]c2c(n1)cc(OCC)cc2	7.6	3.61	5.11919	1.50919	7.23639	20	0.361819
CHEMBL231334	S(=O)(=O)(Nc1cc2CCN(CCc2cc1)C)c1ccc(cc1)CCCC	0.5	4.8	6.30103	1.50103	8.90702	26	0.342578
CHEMBL717	O=C1CC[C@@]2([C@@H]3[C@H]([C@@H]4CC[C@](OC(=O)C)(C(=O)C)[C@]4(CC3)C)C[C@@H](C2=C1)C)C	2	4.2	5.69897	1.49897	8.05596	28	0.287713
CHEMBL2178221	Clc1ccc(NC(=O)[C@H]2CN(C[C@@H]2c2ccc(cc2)\C=C\C(=O)Nc2ccccc2N)CCO)cc1	10	3.52	5	1.48	7.06791	36	0.196331
CHEMBL1277582	Clc1cc(F)ccc1N1NC=2C(=C(N(CCCOC)C(=O)C=2)CN(Cc2ccccc2)C)C1=O	13	3.41	4.88606	1.47606	6.90684	34	0.203142
CHEMBL1939222	Clc1cc(OCC=2NNC(=O)C=2)cc(Cl)c1	20	3.24	4.69897	1.45897	6.64238	16	0.415149
CHEMBL1173087	Clc1cc(ccc1Cl)[C@@]12C[C@]1(CNCC2)C(OC)CC=C	3	4.07	5.52288	1.45288	7.80704	21	0.371764
CHEMBL228133	Clc1ccc(cc1)C1(CCNCC1)c1ccc(cc1)-c1ncnc2[nH]cnc12	1.6	4.35	5.79588	1.44588	8.19295	28	0.292605
CHEMBL2018914	S(CCCC(O)=O)c1[nH]c2c(n1)cc(OC)cc2	50	2.86	4.30103	1.44103	6.07986	18	0.33777
CHEMBL1243305	S(CC(C1CCNCC1)c1nc[nH]c1)c1ccc(cc1)C(F)(F)F	12	3.48	4.92082	1.44082	6.95598	24	0.289832
CHEMBL226385	Clc1cc(Nc2nc(C(F)(F)F)c(cn2)C(=O)NCC2CCOCC2)ccc1	56	2.82	4.25181	1.43181	6.01028	28	0.214653
CHEMBL150681	o1nccc1-c1ccc(OCCCC)cc1	5.51	3.83	5.25885	1.42885	7.43381	16	0.464613
CHEMBL2448712	s1c(ncc1C(=O)Nc1cc(ccc1-n1ccnc1)C#N)-c1ccccc1	15.9	3.37	4.7986	1.4286	6.78322	27	0.25123
CHEMBL477563	S(=O)(=O)(N)c1cc(Nc2nc(N(C)c3cc4nc(n(c4cc3)C)C)ccn2)ccc1	33	3.06	4.48149	1.42149	6.33495	30	0.211165
CHEMBL3298322	Fc1ccc(Oc2nccc3c2cc(OC)c(OC)c3)cc1	1.9	4.3	5.72125	1.42125	8.08745	22	0.367611
CHEMBL1272135	Clc1cccc(F)c1CN1C=CC=C(NC(=O)Nc2cc(OC)ccc2)C1=O	4.5	3.93	5.34679	1.41679	7.55812	28	0.269933
CHEMBL578968	O1OC2(CC1(CC(=O)NCc1ccccc1OCC)C)CCCCC2	2.3	4.23	5.63827	1.40827	7.97016	25	0.318806
CHEMBL1428	O(C(=O)C=1C(C(C(OCCOC)=O)=C(NC=1C)C)c1cc([N+](=O)[O-])ccc1)C(C)C	4	4	5.39794	1.39794	7.63043	30	0.254348
CHEMBL2018917	S(Cc1ccc(cc1)C(C)C)c1[nH]c2c(n1)cc(OC)cc2	0.04	6	7.39794	1.39794	10.4576	22	0.475345
CHEMBL549534	Clc1scnc1-c1cc(nc2c1cccc2OCc1c(ccnc1CN1C=CC=C(C(F)(F)F)C1=O)C)C	0.3	5.13	6.52288	1.39288	9.22062	38	0.242648
CHEMBL567904	o1c2c(cc1C)cc(\N=C(/N[C@H]1CCCCN(CC(=O)N3CCCC3)C1=O)\NC(=O)c1cccnc1)cc2	8	3.72	5.09691	1.37691	7.2049	38	0.189603
CHEMBL464907	Fc1cccc(F)c1C(=O)N(CC(O)(CNC(=O)c1cnn(c1N)-c1ccc(F)cc1)C(F)(F)F)C	49	2.94	4.3098	1.3698	6.09226	36	0.169229
CHEMBL2407900	O(C)c1cc\2c(NC(=O)/C/2=C\c2cc3[nH]nc(c3cc2)\C=C\c2ccc(nc2)N2CCN(CC2)C)cc1	1.6	4.43	5.79588	1.36588	8.19295	37	0.221431
CHEMBL496806	O=C1NC(=O)NC=C1C=1C=C(NCc2c(cccc2C)C)c2n(C=1)c(C)c(n2)C	17	3.41	4.76955	1.35955	6.74215	29	0.232488
CHEMBL1231	O(C(=O)C(O)(C1CCCCC1)c1ccccc1)CC#CCN(CC)CC	0.6	4.87	6.22185	1.35185	8.79509	26	0.338273
CHEMBL2403314	Fc1cc(F)cc(F)c1CN1c2c(cc(Oc3cccnc3C(F)(F)F)cc2)C(=O)N=C1	1.2	4.57	5.92082	1.35082	8.36956	32	0.261549
CHEMBL3217198	Cl.Cl.s1cccc1C(Nc1cc2CCCN(c2cc1)C1CCNCC1)=N	47.1	2.99	4.32698	1.33698	6.11654	26	0.235251
CHEMBL225412	Clc1cc(Nc2nc(C(F)(F)F)c(cn2)C(=O)NCC2CCOCC2)cc(Cl)c1	14	3.53	4.85387	1.32387	6.86134	29	0.236598
CHEMBL549749	Clc1cc(Cl)c(OCCN(CC)CC)cc1-c1nc(nc2sc(cc12)C(=O)NCC)N	0.34	5.15	6.46852	1.31852	9.14378	31	0.294961
CHEMBL2070138	S(=O)(=O)(CCC)c1cc2nc([nH]c2cc1)-c1ccccc1	13	3.58	4.88606	1.30606	6.90684	21	0.328897
CHEMBL2070156	S(=O)(=O)(CC)c1cc2nc([nH]c2cc1)-c1cc(cnc1)-c1ccccc1	15	3.53	4.82391	1.29391	6.81899	26	0.262269
CHEMBL2158298	O1CCN(CC1)CCC(=O)N1CCC(CC1)c1cc(C=2CCCCC=2)c(NC(=O)c2[nH]cc(n2)C#N)cc1	9.1	3.76	5.04096	1.28096	7.12581	38	0.187521
CHEMBL467633	Fc1cccc(F)c1C(=O)N(CC(O)(CNC(=O)c1cnn(c1N)-c1ccc(F)cc1)C(F)(F)F)CC	18	3.47	4.74473	1.27473	6.70706	37	0.181272
CHEMBL523752	n12c(nc(C)c1C)C(NCc1c(cccc1C)CC)=CC=C2	0.5	5.03	6.30103	1.27103	8.90702	22	0.404864
CHEMBL520276	Clc1cccnc1C(=O)N(CC(O)(CNC(=O)c1cnn(c1N)-c1ccc(F)cc1)C(F)(F)F)CC	100	2.73	4	1.27	5.65433	36	0.157065
CHEMBL3142317	Cl.Cl.s1cccc1C(Nc1cc2[nH]cc(c2cc1)C1C2CCN(C1)CC2)=N	49.6	3.05	4.30452	1.25452	6.08479	27	0.225362
CHEMBL195217	Oc1cc(ccc1)-c1cc2c(cc(O)cc2)cc1	7.54	3.87	5.12263	1.25263	7.24125	18	0.402292
CHEMBL593490	o1cc(cc1)-c1ncc(OC[C@@H](N)Cc2c3c([nH]c2)cccc3)cc1-c1cc2c(n[nH]c2C)cc1	2	4.45	5.69897	1.24897	8.05596	35	0.23017
CHEMBL1928092	s1c(-c2cc(OC)c(OC)cc2)c(C)c(C#N)c1\N=C\c1ccc(N(CCC#N)C)cc1	1.1	4.72	5.95861	1.23861	8.42298	32	0.263218
CHEMBL477145	Clc1ccc(CC2=NNC(=O)C(=C2)C)c(F)c1Oc1cc(cc(F)c1)C#N	21	3.44	4.67778	1.23778	6.61242	27	0.244905
CHEMBL429023	O1c2c(C[C@@H]1C(C)=C)c1O[C@H]3[C@H](c4cc(OC)c(OC)cc4OC3)C(=O)c1cc2	3.6486	4.21	5.43787	1.22787	7.68688	29	0.265065
CHEMBL2325940	O(c1cc(OC)c(cc1)-c1nc(n2c1C(=NC=C2)N)C1CC(O)(C1)C)c1ccccc1	16.3	3.56	4.78781	1.22781	6.76796	31	0.218321
CHEMBL517440	Clc1ccccc1C(=O)N(CC(O)(CNC(=O)c1cnn(c1N)-c1ccc(F)cc1)C(F)(F)F)CC	8	3.87	5.09691	1.22691	7.2049	36	0.200136
CHEMBL3142316	Cl.Cl.s1cccc1C(Nc1cc2[nH]cc(c2cc1)C=1CCN(CC=1)C)=N	40.1	3.17	4.39686	1.22686	6.21531	26	0.239051
CHEMBL496606	n12c(nc(C)c1C)C(NCc1c(cccc1C)C)=CC(n1ncnc1)=C2	16	3.57	4.79588	1.22588	6.77937	26	0.260745
CHEMBL1760205	Clc1ccc(cc1)-c1nn(C)c(c1)C(=O)N1CCN(CC1)c1ccccc1OC	6	4	5.22185	1.22185	7.38151	29	0.254535
CHEMBL2019022	S(Cc1ncccc1)c1[nH]c2c(n1)cc(OC)cc2	50	3.08	4.30103	1.22103	6.07986	19	0.319992
CHEMBL2018921	Ic1ccc(cc1)CSc1[nH]c2c(n1)cc(OC)cc2	0.12	5.7	6.92082	1.22082	9.78314	20	0.489157
CHEMBL445	N(CCC=C1c2c(CCc3c1cccc3)cccc2)C	3	4.31	5.52288	1.21288	7.80704	20	0.390352
CHEMBL1667925	o1c2c(ccnc2)c(Nc2cc3c(cc2)/C(=N/O)/CC3)c1C(OCC)=O	1.177	4.74	5.92922	1.18922	8.38144	26	0.322363
CHEMBL3134098	Clc1cc(S(=O)(=O)Nc2ccc(F)cc2F)cc2c1NC(=O)C(NC2=O)(CC)C	27	3.38	4.56864	1.18864	6.45814	29	0.222694
CHEMBL583442	FC(F)Oc1ccc(cc1)CNC(=O)CC1(OOC2(C1)CCCCC2)C	4.6	4.15	5.33724	1.18724	7.54463	26	0.290178
CHEMBL242983	O(C)c1cc(C(=O)Nc2ccc(N3CCN(CC3)Cc3cc(OC)c(OC)cc3)cc2)c(NC(=O)c2cc3c(nc2)cccc3)cc1OC	0.393	5.22	6.40561	1.18561	9.05485	49	0.184793
CHEMBL2036268	Cl.s1cccc1C(Nc1cc2c([nH]cc2C2CCC(NC)CC2)cc1)=N	26.4	3.4	4.5784	1.1784	6.47194	26	0.248921
CHEMBL577694	Clc1cc(ccc1)CNC(=O)CC1(OOC2(C1)CCCCC2)C	2.1	4.5	5.67778	1.17778	8.026	23	0.348957
CHEMBL559565	O(Cc1c(ccnc1CNC(=O)C1CCCCC1)C)c1c2nc(cc(c2ccc1)-c1n(ncc1)C)C	1.6	4.63	5.79588	1.16588	8.19295	36	0.227582
CHEMBL1813477	N1C[C@]2([C@H](CCC2)C1)c1cc2c(cc1)cccc2	7.19	3.98	5.14327	1.16327	7.27043	18	0.403913
CHEMBL809	Clc1cc(ccc1Cl)[C@@H]1CC[C@H](NC)c2c1cccc2	0.31	5.35	6.50864	1.15864	9.20049	20	0.460025
CHEMBL575448	Fc1ncc(NC(=O)[C@]2(N(CCC2)C=2N=C(Nc3[nH]nc(c3)C3CC3)c3n(N=2)ccc3)C)cc1	11	3.8	4.95861	1.15861	7.0094	34	0.206159
CHEMBL567169	FC(F)(F)c1cc(ccc1)CNC(=O)CC1(OOC2(C1)CCCCC2)C	1.5	4.67	5.82391	1.15391	8.23257	26	0.316637
CHEMBL552108	Clc1cc(N(C(C)c2nncn2C)CC2CCCCC2)ccc1C#N	3.8	4.28	5.42022	1.14022	7.66192	25	0.306477
CHEMBL3260743	Clc1ccc(cc1)C=1C=2N(N(Cc3ccc(nc3C)C(F)(F)F)C(=O)C=1c1ccncc1)C(=O)N(N=2)CC	2.6	4.45	5.58503	1.13503	7.89489	38	0.20776
CHEMBL422858	o1nc(cc1-c1ccc(OCCCC)cc1)C	6.07	4.1	5.21681	1.11681	7.37439	17	0.433787
CHEMBL2070155	S(=O)(=O)(CC)c1cc2nc([nH]c2cc1)-c1nccc(c1)-c1ccccc1	14	3.74	4.85387	1.11387	6.86134	26	0.263898
CHEMBL150653	O(CCCC)c1ccc(cc1)-c1ncccc1	3.57	4.35	5.44733	1.09733	7.70025	17	0.452956
CHEMBL572184	Brc1cc(ccc1)CNC(=O)CC1(OOC2(C1)CCCCC2)C	1.8	4.65	5.74473	1.09473	8.12064	23	0.353071
CHEMBL551782	Clc1cc(N(C(C)c2nc(sc2)C)Cc2ccccc2Cl)ccc1C#N	0.067	6.08	7.17393	1.09393	10.1409	26	0.390036
CHEMBL1766005	O(C(=O)C(C(n1ccnc1)c1ccc(Nc2cc3c(cc2)cccc3)cc1)(C)C)C	1.5	4.73	5.82391	1.09391	8.23257	30	0.274419
CHEMBL1813478	Clc1cc(ccc1Cl)[C@@]12[C@@H](CCC1)CN(C2)C	2.22	4.56	5.65365	1.09365	7.99189	17	0.470111
CHEMBL1834662	Clc1c(NC(=O)N(C)c2ncnc(Nc3cc(ccc3)CN3CCN(CC3)C)c2)c(Cl)c(OC)cc1OC	0.3	5.43	6.52288	1.09288	9.22062	38	0.242648
CHEMBL332958	S(=O)(=O)(N(C)c1n(ncc1)-c1ccccc1)c1ccc(cc1)C	20	3.62	4.69897	1.07897	6.64238	23	0.288799
CHEMBL333210	S(=O)(=O)(N(CCCO)c1n(ncc1)-c1ccccc1)c1ccc(cc1)CC=C	10	3.93	5	1.07	7.06791	28	0.252425
CHEMBL455683	Fc1cc(cc(F)c1)\C=C\C(=O)N1CCC(CC1)[C@H](N1CCC(CC1)c1c2cccnc2[nH]c1)CO	27.1	3.5	4.56703	1.06703	6.45587	36	0.17933
CHEMBL578594	S(C)c1ccc(cc1)CNC(=O)CC1(OOC2(C1)CCCCC2)C	4	4.34	5.39794	1.05794	7.63043	24	0.317934
CHEMBL1909985	Clc1cc(Cl)ccc1-c1c2c(nc(C)c1CN)C(=O)N(C2)Cc1ccccc1	15	3.77	4.82391	1.05391	6.81899	28	0.243535
CHEMBL150999	O(CCCC)c1ccc(cc1)-c1[nH]ccn1	18.7	3.68	4.72816	1.04816	6.68364	16	0.417727
CHEMBL359116	O(CCCC)c1ccc(cc1)-c1cc[nH]c1	6.08	4.17	5.2161	1.0461	7.37338	16	0.460836
CHEMBL1760206	Clc1ccc(cc1)-c1n(nc(c1)C(=O)N1CCN(CC1)c1ccccc1OC)C	9	4	5.04576	1.04576	7.13259	29	0.245951
CHEMBL2171124	FC(F)(F)c1cc(ccc1)CC(=O)N1CCc2cc(ccc12)-c1c2c(ncnc2N)n(c1)C	7	4.11	5.1549	1.0449	7.28687	33	0.220814
CHEMBL253641	S1(=O)(=O)N(CCCC1)c1cc(NCC)cc(C(=O)N[C@@H]([C@H](O)CNCc2cc(ccc2)C(F)(F)F)Cc2ccccc2)c1F	10	3.96	5	1.04	7.06791	44	0.160634
CHEMBL453169	O(C)c1cc2c(cc(cc2)-c2cnccc2N)cc1	45.8	3.3	4.33913	1.03913	6.13372	19	0.322827
CHEMBL578578	O1OC2(CC1(CC(=O)NCc1ccccc1N1CCCCC1)C)CCCCC2	2.2	4.62	5.65758	1.03758	7.99745	28	0.285623
CHEMBL604249	O(C)c1ccc(cc1C)C(=O)NCc1cc(ccc1)C(=O)Nc1ccc(cc1)CN(C)C	12.5	3.87	4.90309	1.03309	6.93092	32	0.216591
CHEMBL1909986	Clc1cc(Cl)ccc1-c1c2c(nc(C)c1CN)cn(c2)Cc1ccccc1	0.95	4.99	6.02228	1.03228	8.51298	27	0.315295
CHEMBL560537	O=C(NCCC(c1ccccc1)c1ccccc1)c1cccnc1	9	4.02	5.04576	1.02576	7.13259	24	0.297191
CHEMBL1831092	O(C(=O)C(C(n1ncnc1)c1ccc(Nc2cc3c(cc2)cccc3)cc1)(C)C)C	3.14	4.48	5.50307	1.02307	7.77904	30	0.259301
CHEMBL2019025	S(Cc1ncccc1)c1[nH]c2c(n1)cc(OC(F)F)cc2	28.5	3.53	4.54516	1.01516	6.42495	21	0.30595
CHEMBL1800911	O=C1Nc2c(ccc(c2)-c2cc(ccc2C)C(=O)NC2CC2)C12CCCC2	25	3.59	4.60206	1.01206	6.50539	27	0.24094
CHEMBL227899	Clc1cc(Nc2nc(C(F)(F)F)c(cn2)C(=O)NCC2CCC2)ccc1	8	4.1	5.09691	0.99691	7.2049	26	0.277111
CHEMBL2204469	Fc1cc(F)ccc1CN1N=C(C=CC1=O)Cc1c2cc(F)ccc2n(CC(O)=O)c1C	16	3.82	4.79588	0.97588	6.77937	32	0.211855
CHEMBL1289614	Fc1ccc(NC(=O)N(CCCN2CCN(CC2)C)C2C3CC3(CC2)c2ccc(cc2)C#N)cc1C(F)(F)F	6.1	4.24	5.21467	0.97467	7.37136	39	0.189009
CHEMBL1169660	Clc1cc(S(=O)(=O)Nc2cc(Cl)cnc2Oc2ccccc2C(=O)NCCO)ccc1Cl	8.70964	4.09	5.06	0.97	7.15272	32	0.223523
CHEMBL3289803	Clc1cc(ccc1C(O)Cn1c2cc(ccc2nc1N)C(F)(F)F)C(F)(F)F	2.7	4.6	5.56864	0.968636	7.87172	28	0.281133
CHEMBL565390	o1c2c(cc1C)cc(N\C(=N\C(=O)c1ccc(nc1)C)\N[C@H]1CCCCN(CC(=O)N3CCCC3)C1=O)cc2	27	3.61	4.56864	0.958636	6.45814	39	0.165593
CHEMBL3260742	Clc1ccc(cc1)C=1C=2N(N(Cc3ccc(nc3)C(F)(F)F)C(=O)C=1c1ccncc1)C(=O)N(N=2)CC	11	4	4.95861	0.958607	7.0094	37	0.189443
CHEMBL1645462	Fc1cc(ccc1)Cn1ncc2cc(NC3=NC=Nn4c3c(C)c(NC(OC[C@H]3NCCOC3)=O)c4)ccc12	10	4.06	5	0.94	7.06791	39	0.181228
CHEMBL1762808	Clc1c2n(cc(c2ccc1)-c1scc(n1)CN(C(C)C)CCO)CC1CCOCC1	7.2	4.22	5.14267	0.922667	7.26958	30	0.242319
CHEMBL465451	Clc1cccc(Cl)c1C(=O)N(CC(O)(CNC(=O)c1cnn(c1N)-c1ccc(F)cc1)C(F)(F)F)CCO	20	3.78	4.69897	0.91897	6.64238	38	0.174799
CHEMBL1834658	Clc1c(NC(=O)N(C)c2ncnc(Nc3cc(N4CCN(CC4)C)ccc3)c2)c(Cl)c(OC)cc1OC	0.9	5.14	6.04576	0.905757	8.54617	37	0.230978
CHEMBL1649667	FC(F)(F)c1nn(c2c1CCCC2)-c1ccc(cc1)C1(CC1)C(=O)N1CCCC1	7	4.25	5.1549	0.904902	7.28687	29	0.251271
CHEMBL570639	o1c2c(cc1C)cc(N\C(=N\C(=O)c1ccc(nc1)C(O)=O)\N[C@H]1CCCCN(CC(=O)N3CCCC3)C1=O)cc2	47	3.47	4.3279	0.857902	6.11784	41	0.149216
CHEMBL569862	s1cc(cc1-c1cc(O)ccc1)-c1cc(C)c(O)cc1	1.5	4.97	5.82391	0.853909	8.23257	20	0.411628
CHEMBL570596	s1c(ccc1-c1cc(O)ccc1)-c1cc(C)c(O)cc1	0.94	5.18	6.02687	0.846872	8.51947	20	0.425974
CHEMBL2178223	Clc1ccc(NC(=O)[C@H]2CN(C[C@@H]2c2ccc(cc2)\C=C\C(=O)Nc2ccccc2N)CC(O)(C)C)cc1	7	4.32	5.1549	0.834902	7.28687	38	0.19176
CHEMBL1642258	Clc1cnc(nc1Nc1ccc(N2CCOCC2)cc1OC)Nc1cc2CCN(CCc2cc1OC)CC(=O)N(C)C	0.8	5.27	6.09691	0.82691	8.61848	42	0.205202
CHEMBL558448	Clc1ccc(cc1NC1=CC(=O)N(c2n(ncc12)-c1ccc(F)cc1F)C)C(=O)NC1CC1	16	3.97	4.79588	0.82588	6.77937	33	0.205435
CHEMBL2322875	Clc1c(n(nc1C(F)(F)F)CC(=O)N1CCN(CC1)c1cc(OC)c(Cl)cc1)C	6	4.4	5.22185	0.821849	7.38151	29	0.254535
CHEMBL567292	Clc1cc(Nc2ncc(c3n(ccc23)C)C(=O)N2CCOCC2)ccc1	41	3.57	4.38722	0.817216	6.20169	26	0.238526
CHEMBL1813475	Clc1cc(ccc1Cl)[C@]12[C@H](CCC1)CNC2	11.9	4.11	4.92445	0.814453	6.96112	16	0.43507
CHEMBL1076210	[nH]1c2c(ccnc2NCc2c(cccc2C)C)c(C)c1C	1.8	4.94	5.74473	0.804727	8.12064	21	0.386697
CHEMBL1952142	FC(F)(F)Oc1cc(-n2nnc3c2nc(NCC2CCNCC2)cc3OC)ccc1	4	4.6	5.39794	0.79794	7.63043	30	0.254348
CHEMBL2070154	S(=O)(=O)(CC)c1cc2nc([nH]c2cc1)-c1nc(ccc1)-c1ccccc1	18	3.95	4.74473	0.794728	6.70706	26	0.257964
CHEMBL121503	S(=O)(=O)(N(CCCO)c1n(ncc1)-c1ccccc1)c1ccc(cc1)-c1cc(N)ccc1	40	3.61	4.39794	0.78794	6.21685	32	0.194276
CHEMBL1834663	Clc1c(NC(=O)N(C)c2ncnc(Nc3cc(ccc3)CN(C)C)c2)c(Cl)c(OC)cc1OC	1.4	5.08	5.85387	0.773872	8.27492	34	0.24338
CHEMBL1626	Clc1ccc(cc1)[C@@](OCC[C@@H]1N(CCC1)C)(C)c1ccccc1	0.6	5.45	6.22185	0.771849	8.79509	24	0.366462
CHEMBL565362	Brc1cc(F)c(cc1)CNC(=O)CC1(OOC2(C1)CCCCC2)C	2.8	4.79	5.55284	0.762842	7.84939	24	0.327058
CHEMBL2018906	S(CC)c1[nH]c2c(n1)cc(OC)cc2	50	3.54	4.30103	0.76103	6.07986	14	0.434275
CHEMBL2407897	O=C/1Nc2c(cccc2)\C\1=C/c1cc2[nH]nc(c2cc1)\C=C\c1ccc(cc1)CN(C)C	1	5.24	6	0.76	8.48149	32	0.265047
CHEMBL2387605	Clc1ccccc1-c1[nH]c-2c(n1)C(=O)Nc1cc(ccc1-2)-c1cccnc1	23	3.88	4.63827	0.758272	6.55658	27	0.242836
CHEMBL1242904	O1c2c(-n3c(ncc3)C1)cccc2CCN1CCN(CC1)c1c2c(nc(cc2)C)ccc1	4	4.65	5.39794	0.74794	7.63043	32	0.238451
CHEMBL567487	Clc1ncc(cc1)C(=O)\N=C(\Nc1cc2cc(oc2cc1)C)/N[C@H]1CCCCN(CC(=O)N2CCCC2)C1=O	22	3.91	4.65758	0.747577	6.58386	39	0.168817
CHEMBL476572	S(=O)(=O)(N)c1cc(Nc2nc(N(C)c3cc4nn(Cc5ccccc5)c(c4cc3)C)ccn2)ccc1	1.4	5.11	5.85387	0.743872	8.27492	36	0.229859
CHEMBL387620	Clc1cc(Nc2nc(C(F)(F)F)c(cn2)C(=O)NCC2(O)CCCCC2)ccc1	17	4.03	4.76955	0.739551	6.74215	29	0.232488
CHEMBL1081870	n1c2c(n(C)c1C)ccnc2NCc1c(cccc1C)C	27	3.83	4.56864	0.738636	6.45814	21	0.30753
CHEMBL2177836	Fc1cc(ccc1)C(=O)NCc1ccc(-n2c3nc(ccc3nc2-c2cccnc2N)-c2cc(NC(=O)C)ccc2)cc1	1	5.28	6	0.72	8.48149	43	0.197244
CHEMBL2036270	Cl.s1cccc1C(Nc1cc2c([nH]cc2C2CCC(NCC)CC2)cc1)=N	23.4	3.93	4.63078	0.700784	6.54599	27	0.242444
CHEMBL238146	O=C(N)C=1C=C(NCc2c(cccc2C)CC)c2n(C=1)c(C)c(n2)C	20	4	4.69897	0.69897	6.64238	25	0.265695
CHEMBL292759	Brc1ccc(S(=O)(=O)Nc2cc(N3CCN(CC3)C)c(OC)cc2)cc1	46	3.64	4.33724	0.697242	6.13104	26	0.235809
CHEMBL3092130	s1cc(nc1-n1nc(-c2ccccc2)c(N)c1-c1ccccc1)C(O)=O	6.14	4.52	5.21183	0.691832	7.36735	26	0.28336
CHEMBL567374	O1OC2(CC1(CC(=O)NCCc1cc(NC(OC(C)(C)C)=O)ccc1)C)CCCCC2	4.6	4.66	5.33724	0.677242	7.54463	31	0.243375
CHEMBL2018920	Brc1ccc(cc1)CSc1[nH]c2c(n1)cc(OC)cc2	0.78	5.44	6.10791	0.667905	8.63402	20	0.431701
CHEMBL408443	Fc1c2cc([nH]c2ccc1OC1=NC=Nn2c1c(C)c(OC[C@H](OC(=O)[C@@H](N)CC(C)C)C)c2)C	1.8	5.08	5.74473	0.664728	8.12064	35	0.232018
CHEMBL500394	O(C)c1cc2c(cc(cc2)-c2c3c(cccc3)cnc2)cc1	3.54	4.8	5.451	0.650997	7.70543	22	0.350247
CHEMBL1631540	O=C1NCCN1c1cc(ccc1)CCN1CCN(CC1)c1c2c(nc(cc2)C)ccc1	76	3.48	4.11919	0.639186	5.82281	31	0.187832
CHEMBL2029988	FC(F)(F)C(C)(C)c1onc(NC(=O)Nc2cc(Oc3ncnc4c3cc(OC)c(OC)c4)ccc2)c1	3.4	4.84	5.46852	0.628521	7.7302	37	0.208924
CHEMBL568242	FC(F)(F)Oc1ccccc1CNC(=O)CC1(OOC2(C1)CCCCC2)C	3.7	4.81	5.4318	0.621798	7.67829	27	0.284381
CHEMBL3260754	Clc1ccc(cc1)C=1C=2N(N(Cc3ccc(nc3C)C(F)(F)F)C(=O)C=1c1ccncc1F)C(=O)N(N=2)CC	5	4.68	5.30103	0.62103	7.49344	39	0.192139
CHEMBL565983	FC(F)(F)Oc1ccc(cc1)CNC(=O)CC1(OOC2(C1)CCCCC2)C	3.9	4.81	5.40894	0.598935	7.64597	27	0.283184
CHEMBL1262	Clc1cc(Cl)ccc1CO\N=C(/Cn1ccnc1)\c1ccc(Cl)cc1Cl	0.04	6.8	7.39794	0.59794	10.4576	26	0.402215
CHEMBL209689	OC(=O)Cn1c2c(cc(cc2)C)c(-c2c3c(ncc2)c(ccc3)C)c1C	2.5	5.01	5.60206	0.59206	7.91897	26	0.304576
CHEMBL3289813	Clc1cc(ccc1C(O)Cn1c2nc(OC(C(F)(F)F)C)ccc2nc1N)C(F)(F)F	4.7	4.74	5.3279	0.587902	7.53142	31	0.242949
CHEMBL162383	S(Cc1cc2c(nc1)N(c1nc(F)cc(c1NC2=O)C)CC)c1cc(nc(c1)C)C	5.4	4.68	5.26761	0.587606	7.44619	30	0.248206
CHEMBL1081505	n1c2c(n(C)c1C)cccc2NCc1c(cccc1C)C	9.2	4.45	5.03621	0.586212	7.1191	21	0.339005
CHEMBL1813484	Clc1cc(ccc1Cl)[C@]12[C@H](CCC1)CN(C2)C	7.22	4.56	5.14146	0.581463	7.26788	17	0.427522
CHEMBL459729	Clc1cn(nc1)CCNC=1C=CNC(=O)C=1c1[nH]c2c(n1)c(cc(c2)C1CCN(CC1)CCCF)C	34	3.9	4.46852	0.568521	6.31662	36	0.175462
CHEMBL356594	O(CCCC)c1ccc(cc1)-c1n[nH]c(c1)C	16	4.23	4.79588	0.56588	6.77937	17	0.398786
CHEMBL1209538	Clc1cc(Cl)ccc1C=1n2nc(cc2N=C(C)C=1CN)-c1ccccc1	3	4.96	5.52288	0.562879	7.80704	26	0.300271
CHEMBL432386	S(=O)(=O)(Nc1n(ncc1)-c1ccccc1)c1ccc(cc1)C	100	3.44	4	0.56	5.65433	22	0.257015
CHEMBL567911	Clc1cc(Nc2ncc(c3c2[nH]cc3C)C(=O)N2CCOCC2)ccc1	29	3.99	4.5376	0.547602	6.41427	26	0.246703
CHEMBL461012	Clc1cccc(Cl)c1C(=O)N(CC(O)(CNC(=O)c1cnn(c1N)-c1ccc(F)cc1)C(F)(F)F)CC	7	4.61	5.1549	0.544902	7.28687	37	0.196943
CHEMBL2070160	S(=O)(=O)(C(F)(F)F)c1cc2nc([nH]c2cc1)C=1C=CC(=O)N(C=1)c1ccccc1	9.1	4.5	5.04096	0.540959	7.12581	29	0.245717
CHEMBL555563	Clc1ncccc1[C@@H](OC1CN(C1)C(=O)N1CCCCC1)c1ccc(Cl)cc1	2.05	5.15	5.68825	0.538246	8.0408	28	0.287171
CHEMBL2018915	S(Cc1ccccc1)c1[nH]c2c(n1)cc(OC)cc2	7.8	4.58	5.10791	0.527905	7.22044	19	0.380023
CHEMBL213029	Clc1cc2nccc(-n3c4c(cc(OC)cc4)c(CC(O)=O)c3C)c2cc1	1.6	5.27	5.79588	0.52588	8.19295	27	0.303443
CHEMBL333704	S(=O)(=O)(N(C)c1n(ncc1)-c1ccccc1)c1ccc(cc1)CC=C	20	4.19	4.69897	0.50897	6.64238	25	0.265695
CHEMBL1076192	n1ccc2n(C)c(cc2c1NCc1c(cccc1C)C)C	6.9	4.66	5.16115	0.501151	7.29571	21	0.347415
CHEMBL2018908	S(CCCCCCC)c1[nH]c2c(n1)cc(OC)cc2	0.21	6.18	6.67778	0.497781	9.43959	19	0.49682
CHEMBL2170750	s1c2cc(O)ccc2nc1C(=O)c1cc(O)c(F)cc1	54	3.78	4.26761	0.487606	6.03261	20	0.30163
CHEMBL2018925	S(Cc1cc(Oc2ccccc2)ccc1)c1[nH]c2c(n1)cc(OC)cc2	0.07	6.67	7.1549	0.484902	10.114	26	0.389001
CHEMBL561713	Clc1cc(N(C(CC(C)C)c2nnnn2C)Cc2ccccc2Cl)ccc1C#N	0.3	6.05	6.52288	0.472879	9.22062	29	0.317952
CHEMBL480398	Brc1cc(Nc2ncc(C(=O)NCC3CCOCC3)c(c2)C2CC2)ccc1	29	4.07	4.5376	0.467602	6.41427	27	0.237566
CHEMBL3114731	s1cncc1COC(=O)N(Cc1ccccc1)CC[C@@H](NC(=O)[C@@H](NC(=O)N(Cc1nc(sc1)C(C)C)C)CCN1CCOCC1)Cc1ccccc1	6.7	4.71	5.17393	0.463925	7.31376	53	0.137996
CHEMBL565360	S(c1ccccc1CNC(=O)CC1(OOC2(C1)CCCCC2)C)c1ccccc1CO	2.9	5.08	5.5376	0.457602	7.82785	31	0.252511
CHEMBL1649654	FC(F)(F)c1nn(c2c1CCCC2)-c1ccc(cc1)C(=O)N(CCc1ccccc1)C	3	5.07	5.52288	0.452879	7.80704	31	0.25184
CHEMBL2158222	O=C(Nc1ccc(cc1C=1CCCCC=1)C1CCN(CC1)c1ncccc1)c1[nH]cc(n1)C#N	3.7	5	5.4318	0.431798	7.67829	34	0.225832
CHEMBL1650652	Oc1ccc2c(ccc(c2)-c2cc(O)ccc2)c1-c1cc(O)ccc1	6.03	4.79	5.21968	0.429683	7.37845	25	0.295138
CHEMBL222424	Fc1ccc(cc1)C1(NC(=O)N(C1)C1CCN(CC1)Cc1ccccc1)c1ccc(F)cc1	12.9	4.46	4.88941	0.42941	6.91158	33	0.209442
CHEMBL2415095	Fc1cc(C)c(cc1)[C@@H]1CCCn2nc(nc12)-c1cc(OC)c(-n2cc(nc2)C)cc1	9.24	4.61	5.03433	0.424328	7.11643	31	0.229562
CHEMBL1076536	O(Cc1c(cccc1C)C)C=1c2n(C=CC=1)c(C)c(n2)C	6.2	4.79	5.20761	0.417608	7.36138	21	0.350542
CHEMBL552107	Clc1cc(N(C(CC(C)C)c2nncn2C)Cc2ccccc2Cl)ccc1C#N	1.3	5.47	5.88606	0.416057	8.32042	29	0.286911
CHEMBL534942	Cl.Clc1ccccc1CC(N1CCNCC1)c1ccccc1	14	4.46	4.85387	0.393872	6.86134	22	0.311879
CHEMBL469227	Oc1ccc2c(ccc(c2)-c2cc(O)ccc2)c1-c1ccccc1	1.41	5.46	5.85078	0.390781	8.27056	24	0.344606
CHEMBL1642895	Clc1cc(ccc1Cl)[C@H]1C[C@H](NC)Cc2c1cccc2	5.26	4.89	5.27901	0.389014	7.46232	20	0.373116
CHEMBL196321	Fc1cc(ccc1-c1ccc(OC)cc1)C(C(O)=O)C	87	3.7	4.06048	0.360481	5.73982	20	0.286991
CHEMBL2018916	S(Cc1ccc(cc1)C)c1[nH]c2c(n1)cc(OC)cc2	3.7	5.08	5.4318	0.351798	7.67829	20	0.383914
CHEMBL2177582	Clc1ccc(NC(=O)[C@H]2CN(C[C@@H]2c2ccc(cc2F)\C=C\C(=O)Nc2ccccc2N)C)cc1	21	4.33	4.67778	0.347781	6.61242	35	0.188926
CHEMBL333108	S(=O)(=O)(Nc1n(ncc1)-c1ccccc1)c1ccc(cc1)-c1cc(N)ccc1	95	3.68	4.02228	0.342276	5.68582	28	0.203065
CHEMBL2018911	S(CC1CC1)c1[nH]c2c(n1)cc(OC)cc2	50	3.98	4.30103	0.32103	6.07986	16	0.379991
CHEMBL121040	S(=O)(=O)(N(CCC)c1n(ncc1)-c1ccccc1)c1ccc(cc1)C	10	4.68	5	0.32	7.06791	25	0.282716
CHEMBL1642907	Clc1cc(ccc1Cl)[C@H]1C[C@@H](Cc2c1cccc2)CNC	2.17	5.36	5.66354	0.30354	8.00588	21	0.381232
CHEMBL2070143	S(=O)(=O)(CCC)c1cc2nc([nH]c2cc1)-c1cc(OC(F)(F)F)ccc1	10	4.7	5	0.3	7.06791	26	0.271843
CHEMBL2070142	S(=O)(=O)(CCC)c1cc2nc([nH]c2cc1)-c1cc(ccc1)C(F)(F)F	17	4.47	4.76955	0.299551	6.74215	25	0.269686
CHEMBL1076245	O=C1N(CCC1)c1nc(NCc2c(cccc2C)C)c2[nH]c(C)c(c2c1)C	6.4	4.9	5.19382	0.29382	7.34189	27	0.271922
CHEMBL1934810	Brc1cc2NC(=O)c3nc([nH]c3-c2cc1)-c1ccccc1Cl	20	4.41	4.69897	0.28897	6.64238	22	0.301926
CHEMBL244239	O(C)c1cc(ccc1OC)CCN(CCNC(=O)c1ccccc1NC(=O)c1cc2c(nc1)cccc2)C	14.7	4.57	4.83268	0.262683	6.83139	38	0.179773
CHEMBL331485	S(=O)(=O)(N(CCCC)c1n(ncc1)-c1ccccc1)c1ccc(N)cc1	60	3.98	4.22185	0.241849	5.96793	26	0.229536
CHEMBL389908	Clc1cc(Nc2nc(C(F)(F)F)c(cn2)C(=O)NCc2ccc(F)cc2)ccc1	12	4.68	4.92082	0.240819	6.95598	29	0.239861
CHEMBL2070153	S(=O)(=O)(CC)c1cc2nc([nH]c2cc1)-c1cc(ccc1C)-c1ccccc1	4.2	5.14	5.37675	0.236751	7.60047	27	0.281499
CHEMBL445734	Fc1c(cc(NCC)cc1N1CCCC1=O)C(=O)N[C@@H]([C@H](O)CNCc1cc(ccc1)C(F)(F)F)Cc1ccccc1	15	4.59	4.82391	0.233909	6.81899	42	0.162357
CHEMBL2018905	S(CCC)c1[nH]c2c(n1)cc(OC)cc2	50	4.07	4.30103	0.23103	6.07986	15	0.405324
CHEMBL2010872	O=C1NCc2c1c-1c(CCc3nn(cc-13)C)c1n(c3c(cc(Nc4ncccn4)cc3)c12)CC(C)C	9	4.82	5.04576	0.225757	7.13259	36	0.198127
CHEMBL2181643	OC(=O)\C=C\c1ccc(NC(=O)C2(NC(=O)c3cc4n(C)c(c(c4cc3)C3CCCC3)-c3nccnc3)CCC2)cc1	5.1	5.07	5.29243	0.22243	7.48128	42	0.178126
CHEMBL464234	S(=O)(=O)(N1C[C@@H](N(CC1)c1ncc(cc1F)C(F)(F)F)C)C[C@]12CC[C@H](C[C@@H]1O)C2(C)C	4	5.18	5.39794	0.21794	7.63043	32	0.238451
CHEMBL1087758	Fc1ccc(cc1)COc1nncc2c1n(C[C@H]1C[C@@H]1C)c(C)c2C	5.1	5.08	5.29243	0.21243	7.48128	25	0.299251
CHEMBL1080046	S(=O)(=O)(Nc1cc2CCN(CCc2cc1)Cc1n[nH]cc1)c1ccc(cc1)CCCC	8.8	4.86	5.05552	0.195517	7.14639	31	0.230529
CHEMBL226386	Clc1cc(Nc2nc(C(F)(F)F)c(cn2)C(=O)NCC2CCCC2)ccc1	14	4.66	4.85387	0.193872	6.86134	27	0.254124
CHEMBL453246	n12c(nc(C)c1C)C(NCc1c(cccc1C)C)=CC(n1nccc1)=C2	9.3	4.84	5.03152	0.191517	7.11246	26	0.273556
CHEMBL120797	S(=O)(=O)(N(Cc1ccccc1)c1n(ncc1)-c1ccccc1)c1ccc(N)cc1	45	4.16	4.34679	0.186787	6.14454	29	0.211881
CHEMBL560647	Clc1cc(N(C(CC(C)C)c2nncn2C)Cc2ccccc2C(F)(F)F)ccc1C#N	1.5	5.64	5.82391	0.183909	8.23257	32	0.257268
CHEMBL83668	S=C(Oc1cc2c(cc1)cccc2)N(C)c1cc(ccc1)C	3	5.34	5.52288	0.182879	7.80704	22	0.354865
CHEMBL2177587	Clc1ccc(NC(=O)[C@H]2CN(C[C@@H]2c2ccc(cc2)\C=C\C(=O)Nc2ccccc2N)C)cc1	43	4.19	4.36653	0.176532	6.17245	34	0.181543
CHEMBL2177588	Clc1ccc(NC(=O)[C@@H]2CN(C[C@H]2c2ccc(cc2)\C=C\C(=O)Nc2ccccc2N)C)cc1	43	4.19	4.36653	0.176532	6.17245	34	0.181543
CHEMBL447822	n12c(nc(C)c1C)C(NCc1c(cccc1C)C)=CC(=C2)c1ncccc1	5.2	5.12	5.284	0.163997	7.46936	27	0.276643
CHEMBL221401	Fc1cc(ccc1)CN1CCC(N2CC(NC2=O)(c2ccc(F)cc2)c2ccc(F)cc2)CC1	17.4	4.61	4.75945	0.149451	6.72787	34	0.197879
CHEMBL1242167	O1c2c(-n3c(C1)c(nc3)C(=O)NC1CCC1)cccc2CCN1CCN(CC1)c1c2c(nc(cc2)C)ccc1	3	5.38	5.52288	0.142879	7.80704	39	0.20018
CHEMBL164261	Clc1nc2N(c3ncc(cc3C(=O)Nc2c(c1)C)CSc1cc(nc(c1)C)C)CC	4.2	5.25	5.37675	0.126751	7.60047	30	0.253349
CHEMBL1080717	n12c(cc(C)c1C)C(=NC=C2)NCc1c(cccc1C)C	4.7	5.21	5.3279	0.117902	7.53142	21	0.358639
CHEMBL1209853	Clc1cc(Cl)ccc1C=1n2cc(nc2N=C(C)C=1CN)-c1ccccc1	13	4.77	4.88606	0.116057	6.90684	26	0.265648
CHEMBL1642897	Clc1cc(ccc1Cl)[C@H]1C[C@@H](NC)Cc2c1cccc2	10.15	4.89	4.99353	0.103534	7.05877	20	0.352938
CHEMBL421841	S(Cc1cc2c(nc1)N(c1nccc(c1NC2=O)C)CC)c1cc(nc(c1)C)C	26	4.49	4.58503	0.0950267	6.48131	29	0.223493
CHEMBL560740	Fc1ccc(cc1)C(CCNC(=O)c1ccc(OCC(F)(F)F)nc1)c1ccc(F)cc1	1	5.91	6	0.09	8.48149	32	0.265047
CHEMBL549554	Clc1cc(N(C(C)c2nnc(n2C)C)Cc2ccccc2Cl)ccc1C#N	43	4.28	4.36653	0.0865315	6.17245	27	0.228609
CHEMBL2170754	s1c2cc(O)ccc2nc1C(=O)c1cc(O)c(cc1)C	54	4.19	4.26761	0.0776062	6.03261	20	0.30163
CHEMBL2442495	s1cc(nc1-n1nc(-c2ccccc2)c(C)c1-c1ccccc1)C(O)=O	4.71	5.26	5.32698	0.0669791	7.53012	26	0.28962
CHEMBL555562	Clc1cc(N(C(CCC)c2nnc(n2C)C)Cc2ccccc2Cl)ccc1C#N	4.1	5.34	5.38722	0.0472161	7.61527	29	0.262595
CHEMBL1642913	Clc1cc(ccc1Cl)[C@H]1C[C@H](Cc2c1cccc2)CCN	1.64	5.74	5.78516	0.0451562	8.17779	21	0.389419
CHEMBL1821837	Fc1cc(F)cnc1Cn1c2c(nc1)cc(cc2)C(=O)N[C@@H](CC)c1ccccc1	87	4.04	4.06048	0.0204807	5.73982	30	0.191327
CHEMBL240436	Clc1ccc(cc1)CNC(=O)CN(S(=O)(=O)c1ccc(cc1)C)c1ccccc1CC	1.99526	5.68	5.7	0.0200005	8.05742	31	0.259917
CHEMBL2152524	N1(CCCC1)[C@H]([C@@H](N1CCCC1)c1ccccc1)c1ccccc1	19.9526	4.68	4.7	0.0200001	6.64383	24	0.276826
CHEMBL462360	Clc1cc2nccc(NCCNC(=O)CC3(OOC4(C3)CCCCC4)C)c2cc1	3.4	5.45	5.46852	0.0185211	7.7302	29	0.266559
CHEMBL2070152	S(=O)(=O)(CC)c1cc2nc([nH]c2cc1)-c1cccc(-c2ccccc2)c1C	14	4.84	4.85387	0.013872	6.86134	27	0.254124
CHEMBL542139	Cl.Clc1cc2c(sc(S(=O)(=O)Nc3cc(N4CCNCC4)c(OC)cc3)c2C)cc1	26	4.59	4.58503	-0.00497335	6.48131	30	0.216044
CHEMBL560248	Clc1cc(N([C@@H](CC(C)C)c2nnnn2C)CC2CCC2)ccc1C#N	6.4	5.2	5.19382	-0.00617997	7.34189	26	0.28238
CHEMBL2018910	S(CC(C)(C)C)c1[nH]c2c(n1)cc(OC)cc2	14.1	4.86	4.85078	-0.00921911	6.85697	17	0.403351
CHEMBL376487	s1cc(nc1)[C@@H](NC(=O)c1cc2nc(n(c2cc1)C1CCCCC1)-c1ccoc1)Cc1c2cc(O)ccc2[nH]c1	2.4	5.63	5.61979	-0.0102112	7.94403	40	0.198601
CHEMBL2018922	S(Cc1ccc(cc1)C(O)=O)c1[nH]c2c(n1)cc(OC)cc2	50	4.32	4.30103	-0.01897	6.07986	22	0.276357
CHEMBL520413	FC(F)(F)Oc1cc(Nc2ncc(C(=O)NCC3CCOCC3)c(c2)C2CC2)ccc1	65	4.22	4.18709	-0.0329134	5.91879	31	0.190929
CHEMBL1255837	S(O)(=O)(=O)C.O1[C@](NC(=O)[C@@H]2C[C@H]3[C@H](N(C2)C)Cc2c4c3cccc4[nH]c2)(C(C)C)C(=O)N2[C@@H](Cc3ccccc3)C(=O)N3[C@@H](CCC3)[C@]12O	3	5.56	5.52288	-0.0371213	7.80704	50	0.156141
CHEMBL163	s1cncc1COC(=O)N[C@H]([C@@H](O)C[C@@H](NC(=O)[C@@H](NC(=O)N(Cc1nc(sc1)C(C)C)C)C(C)C)Cc1ccccc1)Cc1ccccc1	12.7	4.94	4.8962	-0.0438037	6.92117	50	0.138423
CHEMBL1090479	O=C(Nc1ccc(cc1)-c1nn(cc1-c1c2cc([nH]c2ncc1)-c1cc(ccc1)CN(C)C)CC)N(C)C	81	4.14	4.09152	-0.048485	5.78369	38	0.152202
CHEMBL3263640	O1CCN(CC1)C(=O)c1ccc(Nc2nc(nc3[nH]cnc23)-c2cccc(NC(=O)c3ccc(cc3)C(C)(C)C)c2C)cc1	3.4	5.52	5.46852	-0.0514789	7.7302	44	0.175686
CHEMBL541973	Clc1cc(N(C(CC(C)C)c2nnnn2C)CC(C)C)ccc1C#N	8.8	5.12	5.05552	-0.0644827	7.14639	25	0.285855
CHEMBL2070150	Clc1ccc(cc1-c1[nH]c2c(n1)cc(S(=O)(=O)CC)cc2)-c1ccccc1	4.9	5.41	5.3098	-0.100196	7.50584	27	0.277994
CHEMBL460491	S1C=C(N2CC(N=C12)(C)C)CS\C(=N\C1CCCCC1)\NC1CCCCC1	5.2	5.39	5.284	-0.106003	7.46936	27	0.276643
CHEMBL2181641	O(C)c1ncc(cc1)-c1n(c2c(ccc(c2)C(=O)NC2(CCC2)C(=O)Nc2ccc(cc2)\C=C\C(O)=O)c1C1CCCC1)C	0.3	6.64	6.52288	-0.117121	9.22062	44	0.20956
CHEMBL2070149	Clc1c(cccc1-c1[nH]c2c(n1)cc(S(=O)(=O)CC)cc2)-c1ccccc1	9.3	5.16	5.03152	-0.128483	7.11246	27	0.263424
CHEMBL1169994	Clc1cc(S(=O)(=O)Nc2cc(Cl)cnc2Oc2cc(Cl)cnc2)ccc1Cl	6.60693	5.31	5.18	-0.13	7.32235	27	0.271198
CHEMBL2181777	OC(=O)\C=C\c1ccc(NC(=O)C2(NC(=O)c3cc4n(C)c(c(c4cc3)C3CCCC3)-c3ncc(cc3)C)CCC2)cc1	0.4	6.53	6.39794	-0.13206	9.04401	43	0.210326
CHEMBL1642908	Clc1cc(ccc1Cl)[C@@H]1C[C@@H](Cc2c1cccc2)CNC	6.02	5.36	5.2204	-0.139596	7.37947	21	0.351403
CHEMBL2018919	Clc1ccc(cc1)CSc1[nH]c2c(n1)cc(OC)cc2	7.1	5.29	5.14874	-0.141258	7.27817	20	0.363908
CHEMBL2316582	FC(F)(F)c1cc(NC(=O)c2cc(C#Cc3cc4c([nH]nc4)nc3)c(cc2)C)ccc1CN1CCN(CC1)C	0.99	6.15	6.00436	-0.145635	8.48766	39	0.217632
CHEMBL1834660	Clc1c(NC(=O)N(C)c2ncnc(Nc3ccc(cc3)CCCN(C)C)c2)c(Cl)c(OC)cc1OC	3.6	5.59	5.4437	-0.146303	7.69511	36	0.213753
CHEMBL2181635	Fc1ccc(nc1)-c1n(c2c(ccc(c2)C(=O)NC2(CCC2)C(=O)Nc2ccc(cc2)\C=C\C(O)=O)c1C1CCCC1)C	0.8	6.25	6.09691	-0.15309	8.61848	43	0.20043
CHEMBL3260744	Clc1ccc(cc1)C=1C=2N(N(Cc3ccc(nc3C)C(F)(F)F)C(=O)C=1c1ccncc1C)C(=O)N(N=2)CC	32	4.65	4.49485	-0.15515	6.35384	39	0.162919
CHEMBL414238	S(=O)(=O)(N(CCC(C)C)c1n(ncc1)-c1ccccc1)c1ccc(N)cc1	60	4.38	4.22185	-0.158151	5.96793	27	0.221034
CHEMBL2018924	S(Cc1nc2c(cc1)cccc2)c1[nH]c2c(n1)cc(OC)cc2	50	4.46	4.30103	-0.15897	6.07986	23	0.264342
CHEMBL1079957	O=C1NCCN1c1nc(NCc2c(cccc2C)C)c2[nH]c(C)c(c2c1)C	8.2	5.25	5.08619	-0.163814	7.18974	27	0.266287
CHEMBL2018909	S(CC(C)C)c1[nH]c2c(n1)cc(OC)cc2	50	4.47	4.30103	-0.16897	6.07986	16	0.379991
CHEMBL2070137	S(=O)(=O)(CC)c1cc2nc([nH]c2cc1)-c1cc(ccc1)-c1ccccc1	17	4.94	4.76955	-0.170449	6.74215	26	0.259313
CHEMBL1080803	O=C1N(C=CC=C1)c1nc(NCc2c(cccc2C)C)c2n(CCO)c(C)c(c2c1)C	40	4.58	4.39794	-0.18206	6.21685	31	0.200543
CHEMBL1813314	Clc1cc(ccc1Cl)[C@]12[C@H](CCCC1)CN(C2)C	11.9	5.12	4.92445	-0.195547	6.96112	18	0.386729
CHEMBL1643511	Clc1cc(N2CCC(NC)c3c2cccc3)ccc1Cl	14.1	5.05	4.85078	-0.199219	6.85697	20	0.342849
CHEMBL1200623	O[C@]1(CC[C@H]2[C@H]3[C@@H]([C@@H]4C(CC3)=CCCC4)CC[C@]12C)CC	1.2907	6.09	5.88917	-0.200825	8.32483	21	0.39642
CHEMBL1235	Clc1cc2nccc(Nc3cc(CNCC)c(O)cc3)c2cc1	54	4.47	4.26761	-0.202394	6.03261	23	0.262287
CHEMBL2070146	S(=O)(=O)(CC)c1cc2nc([nH]c2cc1)-c1cccc(-c2ccccc2)c1F	13	5.09	4.88606	-0.203943	6.90684	27	0.255809
CHEMBL2022997	NCCCC(c1cc(ccc1)C)(c1ccccc1)c1ccccc1	3.2	5.72	5.49485	-0.22515	7.76742	24	0.323642
CHEMBL3298836	ClC=1C=Cc2n(C=1)c(C(=O)NCc1ccc(N3CCN(CC3)c3ccc(F)cc3)cc1)c(n2)CC	1.32	6.11	5.87943	-0.230574	8.31105	35	0.237458
CHEMBL460291	O(C(=O)C=1C(C(C(OCC)=O)=C(NC=1C)C)c1ccccc1\C=C\C(OC(C)(C)C)=O)CC	2	5.93	5.69897	-0.23103	8.05596	33	0.24412
CHEMBL2070141	S(=O)(=O)(CCC)c1cc2nc([nH]c2cc1)-c1ccc(cc1)-c1ccccc1	5.9	5.47	5.22915	-0.240852	7.39183	27	0.273771
CHEMBL2403317	Fc1cc(F)cc(F)c1CN1c2c(cc(Oc3nccc(OC)c3C(F)(F)F)cc2)C(=O)N=C1	20	4.94	4.69897	-0.24103	6.64238	34	0.195364
CHEMBL1642906	Clc1cc(ccc1Cl)[C@@H]1C[C@H](Cc2c1cccc2)CNC	7.69	5.36	5.11407	-0.245926	7.22916	21	0.344246
CHEMBL3114724	s1cncc1COC(=O)N(Cc1ccccc1)CCCCN(Cc1ccccc1)C(=O)[C@@H](NC(=O)N(Cc1nc(sc1)C(C)C)C)C(C)C	1.5	6.08	5.82391	-0.256091	8.23257	49	0.168012
CHEMBL146826	Clc1cc2nccc(Nc3cc(O)c(cc3)CNCC)c2cc1	62	4.47	4.20761	-0.262392	5.9478	23	0.2586
CHEMBL488400	S(Cc1cc(OC)cc(OC)c1)c1[nH]c2cc(OC)ccc2n1	50	4.58	4.30103	-0.27897	6.07986	23	0.264342
CHEMBL2018903	S(CCCC)c1[nH]c2c(n1)cc(OC)cc2	50	4.6	4.30103	-0.29897	6.07986	16	0.379991
CHEMBL3291127	S(CC(O[C@@H]1C[C@](C=C)(C)[C@@H](O)[C@@H]([C@]23[C@H]([C@@]1(C)[C@@H](CC2)C)C(=O)CC3)C)=O)c1cc(N)cnc1	15.5	5.11	4.80967	-0.300332	6.79886	34	0.199966
CHEMBL1642912	Clc1cc(ccc1Cl)[C@@H]1C[C@@H](Cc2c1cccc2)CCN	3.76	5.74	5.42481	-0.315188	7.66841	21	0.365163
CHEMBL2070148	S(=O)(=O)(CC)c1cc2nc([nH]c2cc1)-c1cc(-c2ccccc2)c(F)cc1	17	5.09	4.76955	-0.320449	6.74215	27	0.249709
CHEMBL1643513	Clc1cc(N2CC[C@@H](NC)c3c2cccc3)ccc1Cl	19	5.05	4.72125	-0.328754	6.67387	20	0.333693
CHEMBL479628	Clc1ccc(Cl)cc1Nc1ncc(C(=O)NCC2CCOCC2)c(c1)C1CC1	49	4.64	4.3098	-0.330196	6.09226	28	0.217581
CHEMBL1223751	Clc1ccccc1Cn1nc(C)c(CN(CC(O)COc2ccc(OCC)cc2)C)c1C	20	5.03	4.69897	-0.33103	6.64238	32	0.207574
CHEMBL551305	Clc1cc(N(C(CC(C)C)c2nnnn2C)Cc2ccccc2C(F)(F)F)ccc1C#N	1.3	6.22	5.88606	-0.333943	8.32042	32	0.260013
CHEMBL2181786	OC(=O)\C=C\c1ccc(NC(=O)C(NC(=O)c2cc3n(C)c(c(c3cc2)C2CCCC2)-c2ncccc2)(C)C)cc1	3.3	5.83	5.48149	-0.348514	7.74853	41	0.188988
CHEMBL1079436	O1CC(=O)N(CC1)c1nc(NCc2c(cccc2C)C)c2[nH]c(C)c(c2c1)C	66	4.54	4.18046	-0.359544	5.90941	28	0.211051
CHEMBL1170725	Clc1cc(S(=O)(=O)Nc2cc(Cl)cnc2Oc2cccnc2C)ccc1Cl	22.3872	5.01	4.65	-0.36	6.57315	27	0.24345
CHEMBL2070147	S(=O)(=O)(CC)c1cc2nc([nH]c2cc1)-c1cc(ccc1F)-c1ccccc1	19	5.09	4.72125	-0.368754	6.67387	27	0.24718
CHEMBL3259928	S(C)c1cc(cc(OC)c1C(=O)N[C@]1(CCCN(C1)C)c1ccccc1)C(F)(F)F	46	4.71	4.33724	-0.372758	6.13104	30	0.204368
CHEMBL2069316	S(=O)(=O)(CC)c1cc2nc([nH]c2cc1)-c1cc(-c2ccccc2)c(cc1)C	18	5.14	4.74473	-0.395272	6.70706	27	0.24841
CHEMBL3114713	s1cncc1COC(=O)N[C@@H](Cc1ccccc1)CC[C@@H](NC(=O)[C@@H](NC(=O)N(Cc1nc(sc1)C(C)C)C)C(C)C)Cc1ccccc1	9.3	5.43	5.03152	-0.398483	7.11246	49	0.145152
CHEMBL120426	S(=O)(=O)(Nc1n(ncc1)-c1ccccc1)c1ccc(cc1)-c1cc([N+](=O)[O-])ccc1	65	4.59	4.18709	-0.402913	5.91879	30	0.197293
CHEMBL223079	Clc1cc(ccc1)CN1CCC(N2CC(NC2=O)(c2ccc(F)cc2)c2ccc(F)cc2)CC1	17.7	5.17	4.75203	-0.417973	6.71738	34	0.19757
CHEMBL3114738	s1cncc1COC(=O)N[C@H]([C@@H](NC(=O)[C@@H](NC(=O)N(Cc1nc(sc1)C(C)C)C)C(C)C)Cc1ccccc1)Cc1ccccc1	8.7	5.49	5.06048	-0.429519	7.1534	47	0.1522
CHEMBL551972	Clc1cc(N(C(CC(C)C)c2nnnn2C)CC2CCC2)ccc1C#N	17	5.2	4.76955	-0.430449	6.74215	26	0.259313
CHEMBL2018912	S(CC1CCCCC1)c1[nH]c2c(n1)cc(OC)cc2	5.91	5.66	5.22841	-0.431587	7.39079	19	0.388989
CHEMBL2018907	S(CCCCCC)c1[nH]c2c(n1)cc(OC)cc2	6.25	5.65	5.20412	-0.44588	7.35645	18	0.408692
CHEMBL1287846	O(C)c1c2n(cc(c2ccc1)C(=O)N1CCN2[C@@H](CCCC2)C1)CC1CCCCC1	10	5.45	5	-0.45	7.06791	30	0.235597
CHEMBL1834661	Clc1c(NC(=O)N(C)c2ncnc(Nc3ccc(cc3)C3CCN(CC3)CC)c2)c(Cl)c(OC)cc1OC	1.1	6.42	5.95861	-0.461393	8.42298	38	0.221657
CHEMBL3127163	s1cc(nc1-n1nc(c2c1cc(cc2)C(F)(F)F)-c1ccccc1)C(O)=O	8.26	5.56	5.08302	-0.47698	7.18526	27	0.266121
CHEMBL196945	Clc1cc(ccc1Cl)-c1ccc(cc1F)C1(CC1)C(O)=O	25	5.09	4.60206	-0.48794	6.50539	21	0.30978
CHEMBL2181776	OC(=O)\C=C\c1ccc(NC(=O)C2(NC(=O)c3cc4n(C)c(c(c4cc3)C3CCCC3)-c3ncccc3)CCC2)cc1	2.9	6.03	5.5376	-0.492398	7.82785	42	0.186377
CHEMBL226067	Clc1cc(Nc2nc(C(F)(F)F)c(cn2)C(=O)NCC2CCCCC2)ccc1	19	5.22	4.72125	-0.498754	6.67387	28	0.238352
CHEMBL3298835	ClC=1C=Cn2c(nc(CC)c2C(=O)NCc2ccc(N3CCC(CC3)c3ccc(F)cc3)cc2)C=1	0.6	6.73	6.22185	-0.508151	8.79509	35	0.251288
CHEMBL3291394	S(CC(O[C@@H]1C[C@](C=C)(C)[C@@H](O)[C@@H]([C@]23[C@H]([C@@]1(C)[C@@H](CC2)C)C(=O)CC3)C)=O)c1cc(NC(=O)CN2CC(O)CCC2)cnc1	12.4	5.42	4.90658	-0.513422	6.93585	44	0.157633
CHEMBL1080473	[nH]1c2c(cc(nc2NCc2c(cccc2C)C)-c2ccccc2)c(C)c1C	0.3	7.04	6.52288	-0.517121	9.22062	27	0.341504
CHEMBL347303	O(CCCC)c1ccc(cc1)-c1[nH][n+](cc1)C	23.5	5.15	4.62893	-0.521068	6.54337	17	0.384904
CHEMBL1079437	O=C1NC(=CC=C1)c1nc(NCc2c(cccc2C)C)c2[nH]c(C)c(c2c1)C	62	4.73	4.20761	-0.522392	5.9478	28	0.212421
CHEMBL2375371	Brc1cc(F)c(S(=O)(=O)Nc2ccc(Oc3ccccc3)cc2C(O)=O)cc1	1.1	6.49	5.95861	-0.531393	8.42298	28	0.300821
CHEMBL2181618	OC(=O)\C=C\c1ccc(NC(=O)C2(NC(=O)c3cc4n(C)c(c(c4cc3)C3CCCC3)-c3ncccc3)CCCC2)cc1	0.9	6.59	6.04576	-0.544242	8.54617	43	0.198748
CHEMBL2179319	FC(F)(F)C=1c2n(C=CC=1N1CCC(CC1)c1ccccc1)c(nn2)CC1CC1	20	5.25	4.69897	-0.55103	6.64238	29	0.229047
CHEMBL496400	O=C1N(CCCC1)C=1C=C(NCc2c(cccc2C)C)c2n(C=1)c(C)c(n2)C	34	5.02	4.46852	-0.551479	6.31662	28	0.225594
CHEMBL517646	Clc1cc(Cl)ccc1Nc1ncc(C(=O)NCC2CCOCC2)c(c1)C1CC1	82	4.64	4.08619	-0.553814	5.77616	28	0.206291
CHEMBL196947	Fc1cc(ccc1-c1ccc(cc1)-c1ccc(O)cc1)C1(CC1)C(O)=O	35	5.01	4.45593	-0.554068	6.29882	26	0.242262
CHEMBL377414	Fc1cc(F)ccc1[C@@H](N1[C@@H](CC(C)C)C(=O)N[C@H](C2Cc3c(C2)cccc3)C1=O)C(=O)N(C)C	38	4.98	4.42022	-0.559784	6.24834	35	0.178524
CHEMBL147806	Clc1cc2nccc(Nc3cc(O)c(cc3)CNC(C)(C)C)c2cc1	24	5.18	4.61979	-0.560211	6.53045	25	0.261218
CHEMBL2414256	Clc1ccc(cc1)C(NCCNc1c2c(ncc1)cc(Cl)cc2)c1nnnn1C(C)(C)C	12.4	5.48	4.90658	-0.573422	6.93585	32	0.216745
CHEMBL1290041	FC(F)(F)c1ccc(cc1)C1=CC(=O)N(C=C1)c1cc2c(n(nc2)CCN2CCCC2)cc1	27	5.15	4.56864	-0.581364	6.45814	33	0.195701
CHEMBL2151164	Fc1ccc(cc1)-c1nc2c(n1C)cccc2Nc1nc(OC)c(-n2cc(nc2)C)cc1	3.5	6.05	5.45593	-0.594068	7.7124	32	0.241013
CHEMBL267210	Clc1ccc(cc1)-c1nc2c(ccc(C)c2C)c(C(O)=O)c1O	1	6.62	6	-0.62	8.48149	23	0.36876
CHEMBL1080472	O=C1N(C=CC=C1)c1nc(NCc2c(cccc2C)C)c2[nH]c(C)c(c2c1)C	20	5.33	4.69897	-0.63103	6.64238	28	0.237228
CHEMBL2376562	S(=O)(=O)(Nc1cc(Oc2ccccc2)ccc1C(O)=O)c1ccc(cc1)C	7.9	5.77	5.10237	-0.667627	7.21262	27	0.267134
CHEMBL346178	Clc1cc(ccc1Cl)[C@]1(CCCN(C1)C(=O)c1ccccc1)CCCN1CCC(N(C(=O)C)C)(CC1)c1ccccc1	7	5.86	5.1549	-0.705098	7.28687	42	0.173497
CHEMBL2181629	OC(=O)\C=C\c1ccc(NC(=O)C2(NC(=O)c3cc4n(C)c(c(c4cc3)C3CCCC3)-c3ccncc3)CCCC2)cc1	2.2	6.38	5.65758	-0.722423	7.99745	43	0.185987
CHEMBL214957	Clc1ccc(cc1)-c1sc2c(N=CN(C2=O)c2cc(OC)c(OCCN3CCCC3)cc2)c1	9.3	5.76	5.03152	-0.728483	7.11246	33	0.215529
CHEMBL197202	Fc1cc(ccc1-c1ccc(cc1)-c1ccc(O)cc1)C(C(O)=O)C	58	4.98	4.23657	-0.743428	5.98874	25	0.23955
CHEMBL2070140	S(=O)(=O)(CCC)c1cc2nc([nH]c2cc1)-c1cc(ccc1)-c1ccccc1	19	5.47	4.72125	-0.748754	6.67387	27	0.24718
CHEMBL1928095	s1c(-c2cc(OC)c(OC)cc2)c(C)c(C#N)c1\N=C\c1ccc(cc1)-c1ccccc1	2.3	6.39	5.63827	-0.751728	7.97016	32	0.249067
CHEMBL1079958	O=C1N(C=CC=C1)c1nc(NCc2c(cccc2C)C)c2n(CC)c(C)c(c2c1)C	6.5	5.94	5.18709	-0.752913	7.33237	30	0.244412
CHEMBL231430	Clc1ccc(cc1)-c1ccc(S(=O)(=O)Nc2cc3CCN(CCc3cc2)C)cc1	16	5.55	4.79588	-0.75412	6.77937	29	0.233771
CHEMBL466191	Clc1cc(Cl)ccc1Nc1ncc(C(=O)NCC2CCOCC2)c(c1)C(C)C	43	5.13	4.36653	-0.763468	6.17245	28	0.220445
CHEMBL2181789	Clc1ccc(nc1)-c1n(c2c(ccc(c2)C(=O)NC(C(=O)Nc2ccc(cc2)\C=C\C(O)=O)(C)C)c1C1CCCC1)C	1.4	6.63	5.85387	-0.776128	8.27492	42	0.197022
CHEMBL2018923	S(Cc1cc(ccc1)-c1ccccc1)c1[nH]c2c(n1)cc(OC)cc2	2.2	6.46	5.65758	-0.802423	7.99745	25	0.319898
CHEMBL479	S1c2c(N(c3c1cccc3)CCC1N(CCCC1)C)cc(SC)cc2	6.3778	6	5.19533	-0.804671	7.34402	25	0.293761
CHEMBL2018904	S(CCCCC)c1[nH]c2c(n1)cc(OC)cc2	50	5.12	4.30103	-0.81897	6.07986	17	0.357639
CHEMBL2181634	Clc1ccc(nc1)-c1n(c2c(ccc(c2)C(=O)NC2(CCC2)C(=O)Nc2ccc(cc2)\C=C\C(O)=O)c1C1CCCC1)C	1	6.82	6	-0.82	8.48149	43	0.197244
CHEMBL1778481	OC(=O)\C=C\c1ccc(NC(=O)C(NC(=O)c2cc3n(C)c(c(c3cc2)C2CCCCC2)-c2ncccc2)(C)C)cc1	2.7	6.39	5.56864	-0.821364	7.87172	42	0.187422
CHEMBL2413882	Clc1cc2nccc(Nc3cc(ccc3)C(N3CCCC3)c3nnnn3C(C)(C)C)c2cc1	13.8	5.69	4.86012	-0.829879	6.87018	33	0.208187
CHEMBL248229	O1CC(=O)N(c2cc(ccc12)CN1CCN(CC1)CCOc1c2c(nc(cc2)C)ccc1)CCCC	16	5.63	4.79588	-0.83412	6.77937	36	0.188316
CHEMBL228814	Clc1cc2N=C(N(Cc3ccccc3)C(=O)c2cc1)[C@@H](N(C(=O)c1ccc(cc1)C)CCCN)C(C)C	24.3	5.45	4.61439	-0.835606	6.52282	37	0.176292
CHEMBL3104375	FC(F)(F)c1ccc(N(C2CCN(CC2)c2ncc(cc2)C(F)(F)F)c2cccnc2)cc1	9.8	5.86	5.00877	-0.851226	7.08031	33	0.214555
CHEMBL248231	O1CC(=O)N(c2cc(ccc12)CN1CCN(CC1)CCOc1c2c(nc(cc2)C)ccc1)Cc1ccccc1	11	5.83	4.95861	-0.871393	7.0094	39	0.179728
CHEMBL3298907	ClC=1C=Cn2c(nc(CC)c2C(=O)NCc2ccc(N3CCC(CC3)c3ccc(Cl)cc3)cc2)C=1	0.38	7.3	6.42022	-0.879784	9.0755	35	0.2593
CHEMBL496426	o1cccc1C=1C=C(NCc2c(cccc2C)C)c2n(C=1)c(C)c(n2)C	13	5.78	4.88606	-0.893943	6.90684	26	0.265648
CHEMBL3291120	S(CC(O[C@@H]1C[C@](C=C)(C)[C@@H](O)[C@@H]([C@]23[C@H]([C@@]1(C)[C@@H](CC2)C)C(=O)CC3)C)=O)c1cc(ccc1)CO	15.4	5.71	4.81248	-0.897521	6.80283	35	0.194367
CHEMBL1813316	Clc1cc(ccc1Cl)[C@]12[C@H](CCCC1)CN(C2)CC	17.9	5.65	4.74715	-0.902853	6.71048	19	0.353183
CHEMBL248407	O1CC(=O)N(c2cc(ccc12)CN1CCN(CC1)CCOc1c2c(nc(cc2)C)ccc1)CCc1ccccc1	5	6.22	5.30103	-0.91897	7.49344	40	0.187336
CHEMBL1171008	Clc1cc(S(=O)(=O)Nc2cc(Cl)cnc2Oc2ccccc2C(O)=O)ccc1Cl	39.8107	5.32	4.4	-0.92	6.21976	29	0.214474
CHEMBL551964	O1c2c3c(nc(cc3)C)ccc2OC[C@@H]1CN1CCN(CC1)c1nc2c(cc(cc2)C#N)cc1	98	4.93	4.00877	-0.921226	5.66673	34	0.166668
CHEMBL2181765	o1cc(cc1)-c1n(c2c(ccc(c2)C(=O)NC2(CCC2)C(=O)Nc2ccc(cc2)\C=C\C(O)=O)c1C1CCCC1)C	3	6.47	5.52288	-0.947121	7.80704	41	0.190416
CHEMBL266212	O(C)c1cc(ccc1OC)CN1CCN(CC1)c1ccc(NC(=O)c2ccccc2NC(=O)c2cc3c(nc2)cccc3)cc1	23	5.59	4.63827	-0.951728	6.55658	45	0.145702
CHEMBL1080088	O=C1N(C=CC=C1)c1nc(NCc2c(cccc2C)C)c2n(CC=C)c(C)c(c2c1)C	6	6.18	5.22185	-0.958151	7.38151	31	0.238113
CHEMBL595632	O(CCc1cc2c(cc1)cccc2)c1cc(ccc1\C=C\C(O)=O)Cn1nccc1	30	5.5	4.52288	-0.977121	6.39346	30	0.213115
CHEMBL1290150	Clc1cc(Cl)ccc1C1=CC(=O)N(C=C1)c1cc2c(n(nc2)CCN2CCCC2)cc1	40	5.44	4.39794	-1.04206	6.21685	31	0.200543
CHEMBL1077335	OC(=O)\C=C\c1ccc(NC(=O)C2(NC(=O)c3cc4nc(n(c4cc3)C3CCCCC3)-c3ncccc3)CCCC2)cc1	7.4	6.19	5.13077	-1.05923	7.25276	43	0.168669
CHEMBL147587	Clc1cc2nccc(Nc3cc(O)c(cc3)CN(CC)CC)c2cc1	39	5.47	4.40894	-1.06106	6.23239	25	0.249296
CHEMBL372846	Fc1cc(ccc1-c1cc(F)c(cc1)-c1ccc(O)cc1)C1(CC1)C(O)=O	74	5.21	4.13077	-1.07923	5.83918	27	0.216266
CHEMBL3298909	ClC=1C=Cn2c(nc(CC)c2C(=O)NCc2ccc(N3CCC(CC3)c3ccc(OC(F)(F)F)cc3)cc2)C=1	0.29	7.62	6.5376	-1.0824	9.24143	39	0.23696
CHEMBL2152522	N1(CCCCC1)[C@H]([C@@H](N1CCCCC1)c1ccccc1)c1ccccc1	19.9526	5.8	4.7	-1.1	6.64383	26	0.255532
CHEMBL231350	Clc1ccc(cc1)-c1ccc(S(=O)(=O)Nc2cc3CCN(CCc3cc2NC(C)C)C)cc1	25	5.72	4.60206	-1.11794	6.50539	33	0.197133
CHEMBL496	Clc1c(Cc2c(O)c(Cl)cc(Cl)c2Cl)c(O)c(Cl)cc1Cl	1.2265	7.03	5.91133	-1.11867	8.35615	21	0.397912
CHEMBL2387501	Clc1cccc(C(F)(F)F)c1-c1[nH]c-2c(n1)C(=O)Nc1cc(ccc1-2)-c1ccccc1	7.2	6.27	5.14267	-1.12733	7.26958	31	0.234503
CHEMBL2413881	Clc1cc2nccc(Nc3cc(ccc3)C(N(CC)CC)c3nnnn3C(C)(C)C)c2cc1	12.2	6.12	4.91364	-1.20636	6.94583	33	0.21048
CHEMBL2018918	S(Cc1ccc(cc1)C(C)(C)C)c1[nH]c2c(n1)cc(OC)cc2	7.2	6.4	5.14267	-1.25733	7.26958	23	0.316069
CHEMBL332690	S(=O)(=O)(N(Cc1ccccc1)c1n(ncc1)-c1ccccc1)c1ccc(cc1)CC=C	20	5.96	4.69897	-1.26103	6.64238	31	0.21427
CHEMBL465470	Clc1cc(Cl)ccc1Nc1ncc(C(=O)NCC2CCOCC2)c(c1)C(C)(C)C	28	5.82	4.55284	-1.26716	6.43581	29	0.221925
CHEMBL1630	Cl.Clc1cc2nccc(Nc3cc(CN(CC)CC)c(O)cc3)c2cc1	85	5.47	4.07058	-1.39942	5.7541	26	0.221311
CHEMBL502335	S(Cc1cc2c(cc1)cccc2)c1[nH]c2cc(OC)ccc2n1	50	5.75	4.30103	-1.44897	6.07986	23	0.264342
CHEMBL1778587	o1cc(cc1)-c1n(c2c(ccc(c2)C(=O)NC(C(=O)Nc2ccc(cc2)\C=C\C(O)=O)(C)C)c1C1CCCCC1)C	4.2	6.84	5.37675	-1.46325	7.60047	41	0.185377
CHEMBL1077334	o1cc(cc1)-c1nc2cc(ccc2n1C1CCCCC1)C(=O)NC1(CCCC1)C(=O)Nc1ccc(cc1)\C=C\C(O)=O	7.7	6.58	5.11351	-1.46649	7.22836	42	0.172104
CHEMBL1171786	Clc1cc(S(=O)(=O)Nc2cc(Cl)ccc2Oc2ccccc2C(O)=O)ccc1Cl	10.9648	6.44	4.96	-1.48	7.01136	29	0.241771
CHEMBL256092	Clc1cc(Cn2nc(NC(OC(C)C)=O)cc2C)c(OCc2ccccc2)cc1	69	5.66	4.16115	-1.49885	5.88213	29	0.202832
CHEMBL427548	Fc1cc(ccc1-c1cc(F)c(cc1)-c1ccc(F)cc1)C1(CC1)C(O)=O	46	5.96	4.33724	-1.62276	6.13104	27	0.227076
CHEMBL453384	Clc1cc2nccc(Nc3cc(CNC(C)(C)C)c(F)cc3)c2cc1	64	6.09	4.19382	-1.89618	5.92831	25	0.237132
CHEMBL2018926	S(Cc1ccc(OCc2ccccc2)cc1)c1[nH]c2c(n1)cc(OC)cc2	50	6.26	4.30103	-1.95897	6.07986	27	0.22518
CHEMBL2181621	Clc1ccc(nc1)-c1n(c2c(ccc(c2)C(=O)NC2(CCCC2)C(=O)Nc2ccc(cc2)\C=C\C(O)=O)c1C1CCCC1)C	4.3	7.38	5.36653	-2.01347	7.58603	44	0.17241
CHEMBL447955	Fc1ccc(cc1)[C@H]1[C@H]2[C@H](CC[C@@H]1O[C@H](C)c1cc(cc(c1)C(F)(F)F)C(F)(F)F)CN(C2)C1=CC(=O)CC1	29	6.63	4.5376	-2.0924	6.41427	39	0.164468
CHEMBL436137	O(CCN1CCCC1)c1ccc(Nc2nc3c(nn2)cc(cc3C)-c2c(cccc2C)C)cc1	12	7.04	4.92082	-2.11918	6.95598	34	0.204588
CHEMBL3298908	ClC=1C=Cc2n(C=1)c(C(=O)NCc1ccc(N3CCC(CC3)c3ccc(Cl)cc3)cc1)c(n2)CC	6.77	7.3	5.16941	-2.13059	7.30738	35	0.208782
CHEMBL404646	o1c(nc(CCOc2cc(ccc2)C[C@H]2[C@H](N(C2=O)c2ccc(cc2)C(C)(C)C)C(O)=O)c1C)-c1cc(OC)ccc1	8.3	7.22	5.08092	-2.13908	7.1823	42	0.171007
CHEMBL10188	Oc1c(nc2c(cccc2)c1C(=O)N[C@@H](CC)c1ccccc1)-c1ccccc1	9	7.38	5.04576	-2.33424	7.13259	29	0.245951
CHEMBL3265238	Brc1cc2c3cc(Br)ccc3n(c2cc1)C[C@@H](F)CNc1nc(OC)ccc1	1.9	8.06	5.72125	-2.33875	8.08745	28	0.288837
CHEMBL272336	Clc1ccc(cc1)-c1oc(C)c(n1)CCOc1cc(ccc1)C[C@H]1[C@H](N(C1=O)c1ccc(cc1)C(C)(C)C)C(O)=O	2.8	7.93	5.55284	-2.37716	7.84939	41	0.191449
CHEMBL2181775	Clc1ccc(cc1)-c1n(c2c(ccc(c2)C(=O)NC2(CCC2)C(=O)Nc2ccc(cc2)\C=C\C(O)=O)c1C1CCCC1)C	2.7	8.01	5.56864	-2.44136	7.87172	43	0.183063
CHEMBL257517	o1c(nc(CCOc2cc(ccc2)C[C@H]2[C@H](N(C2=O)c2ccc(cc2)C(C)(C)C)C(O)=O)c1C)-c1ccc(OC)cc1	22	7.22	4.65758	-2.56242	6.58386	42	0.156759
CHEMBL372751	Fc1cc(ccc1-c1ccc(cc1)C1CCC(CC1)(C)C)C1(CC1)C(O)=O	13	7.45	4.88606	-2.56394	6.90684	27	0.255809
CHEMBL2152165	Clc1ccc(nc1)[C@](NC(=O)NC1CCCC1)(Cc1ccccc1)c1cc(OC(F)(F)C(F)F)cc(F)c1	17	7.37	4.76955	-2.60045	6.74215	38	0.177425
CHEMBL3116156	Clc1ccc(nc1)[C@@](Nc1[nH]c2c(n1)cccc2)(Cc1ccccc1)c1cc(OC(F)(F)C(F)F)cc(F)c1	3	8.16	5.52288	-2.63712	7.80704	39	0.20018
CHEMBL230686	Clc1cccc(Cl)c1-c1cc(c2nc(nnc2c1)Nc1ccc(OCCN2CCCC2)cc1)C	12	7.57	4.92082	-2.64918	6.95598	34	0.204588
CHEMBL429734	Clc1cc(ccc1)-c1oc(C)c(n1)CCOc1cc(ccc1)C[C@H]1[C@H](N(C1=O)c1ccc(cc1)C(C)(C)C)C(O)=O	5.3	7.93	5.27572	-2.65428	7.45767	41	0.181894
CHEMBL1210434	S(=O)(=O)(N(c1cc(cc(c1)C(=O)N[C@@H]([C@H](O)CNCc1cc(ccc1)C(F)(F)F)Cc1ccccc1)C1CCCC1)c1ccccc1)C	14	7.56	4.85387	-2.70613	6.86134	48	0.142945
CHEMBL3116155	Clc1ccc(nc1)[C@@](Nc1[nH]c2c(n1)cc(F)cc2)(Cc1ccccc1)c1cc(OC(F)(F)C(F)F)cc(F)c1	2	8.41	5.69897	-2.71103	8.05596	40	0.201399
CHEMBL234940	Clc1cc(C=2CCCC=2c2nc(ccc2)C(O)=O)c(OCc2ccc(F)cc2F)cc1	62	7.14	4.20761	-2.93239	5.9478	31	0.191864
CHEMBL3116154	Clc1ccc(nc1)[C@@](Nc1[nH]c2c(n1)cc(F)cc2F)(Cc1ccccc1)c1cc(OC(F)(F)C(F)F)cc(F)c1	3	8.59	5.52288	-3.06712	7.80704	41	0.190416
CHEMBL3116158	Clc1ccc(nc1)[C@@](Nc1scc(n1)C(F)(F)F)(Cc1ccccc1)c1cc(OC(F)(F)C(F)F)cc(F)c1	13	8.19	4.88606	-3.30394	6.90684	39	0.177098
CHEMBL197140	Fc1cc(ccc1-c1ccc(OC2CC(CC(C2)(C)C)(C)C)cc1)C1(CC1)C(O)=O	33	7.84	4.48149	-3.35851	6.33495	30	0.211165
CHEMBL565591	Clc1cc(Cl)ccc1Cn1c2c(cc(F)cc2\C=C\C(=O)NS(=O)(=O)c2sc(Cl)c(Cl)c2)c(c1)C	6.6	8.64	5.18046	-3.45954	7.323	35	0.209228
CHEMBL552240	Clc1ccc(cc1)C(=O)c1c2c(n(Cc3cc(O[C@@H](CC)C(O)=O)ccc3)c1C)cc(OC(F)(F)F)cc2	91	7.76	4.04096	-3.71904	5.71222	38	0.150322
CHEMBL1213341	S(CCN(C)C)[C@@H]1N(C)C(=O)[C@@H](NC(=O)[C@@H](N(C)C(=O)[C@@H](N(C)C(=O)[C@@H](N(C)C(=O)[C@@H](N(C)C(=O)[C@H](NC(=O)[C@@H](NC(=O)[C@@H](N(C)C(=O)[C@@H](NC(=O)[C@@H](N(C)C1=O)CC(O)(C)C)C(C)C)CC(C)C)C)C)CC(C)C)CC(C)C)C(C)C)[C@H](O)[C@@H](C\C=C\C)C)CC	12.4	13.09	4.90658	-8.18342	6.93585	92	0.0753897
CHEMBL160	O=C1N(C)[C@@H]([C@H](O)[C@@H](C\C=C\C)C)C(=O)N[C@@H](CC)C(=O)N(CC(=O)N(C)[C@@H](CC(C)C)C(=O)N[C@@H](C(C)C)C(=O)N(C)[C@@H](CC(C)C)C(=O)N[C@@H](C)C(=O)N[C@H](C)C(=O)N(C)[C@@H](CC(C)C)C(=O)N(C)[C@@H](CC(C)C)C(=O)N(C)[C@H]1C(C)C)C	7	14.36	5.1549	-9.2051	7.28687	85	0.0857279
	CYP2C19 inhibitors with negative clogP and LipE>=5
	CYP2C19 inhibitors with positive clogP and LipE>=5

## Sheet: Table S4
Exploring the Chemical Space of Cytochrome P450 Inhibitors using Integrated Physicochemical Parameters, Drug Efficiency Metrics and Decision Tree Models Yusra Sajid Kiani and Ishrat Jabeen* Research Center for Modeling and Simulation (RCMS), National University of Science and Technology (NUST), Sector H-12, 44000, Islamabad, Pakistan * Correspondence: Corresponding Author: Ishrat.jabeen@rcms.nust…
	TABLE S4: LipE and LE profiling results of CYP2D6 inhibitors dataset
CMPD_CHEMBLID CYP2D6	CANONICAL_SMILES	IC50 (µM)	clogp	pIC50	LipE	ΔG	a_heavy	Ligand efficiency
CHEMBL520612	F[B-](F)(F)F.O(C)c1c2c(cc([n+](c2C)-c2ccc(cc2)C)C)cc(OC)c1	5.61e-08	-0.89	7.25104	8.14104	10.2499	28	0.366069
CHEMBL2069802	S(=O)(=O)(Cc1oc(nn1)C(=O)NCc1ccncc1)c1ccccc1	5.7e-06	-1.15	5.24413	6.39412	7.413	25	0.29652
CHEMBL375355	[Cl+3]([O-])([O-])([O-])[O-].O(C)c1c2c(cc([n+](c2C)-c2c3c(ccc2)cccc3)C)cc(OC)c1	9e-07	-0.21	6.04576	6.25576	8.54617	31	0.275683
CHEMBL12089	[Cl-].O1c2c(OC1)cc-1c(CC[n+]3c-1cc1c(c3)c(OC)c(OC)cc1)c2	4.5042e-06	-0.77	5.34638	6.11638	7.55755	26	0.290675
CHEMBL188642	O(C)C12N(C3=C([C@H]1COC(=O)N)C(=O)C(=N)C(C)=C3O)C[C@@H]1N([C@@H]12)C	9.43e-05	-1.32	4.02549	5.34549	5.69036	25	0.227614
CHEMBL170988	N(CCc1ccccc1)C(NC(N)=N)=N	2.7e-05	-0.69	4.56864	5.25864	6.45814	15	0.430543
CHEMBL2069801	S(=O)(=O)(Cc1nc(on1)C(=O)NCc1ccncc1)c1ccccc1	9.4e-06	-0.15	5.02687	5.17687	7.10589	25	0.284236
CHEMBL481022	FC(F)(F)C(=O)[O-].O(C)c1c2c(cc([n+](c2C)-c2ccc(cc2)C(C)C)C)cc(OC)c1	1.094e-07	0.04	6.96098	6.92098	9.83992	32	0.307497
CHEMBL486278	O(C[C@@H](O)CNC(Cc1ccc(OC)cc1)(C)C)c1c2NC(=O)Nc2ccc1	1.26e-09	2.66	8.89963	6.23963	12.5804	28	0.449298
CHEMBL383586	S(=O)(=O)(NC)c1cc2CC(Oc2cc1)C(=O)N([C@H](CN1C[C@@H](O)CC1)c1ccccc1)C	1.1e-08	1.88	7.95861	6.07861	11.2501	32	0.351567
CHEMBL15245	O[C@H]1CC[C@@H]2[C@H](C[C@@H]3N(CCc4c5c([nH]c34)cccc5)C2)[C@H]1C(OC)=O	8.4e-09	2.17	8.07572	5.90572	11.4157	26	0.439065
CHEMBL19019	O1[C@@H]2[C@]34CCN([C@H](Cc5c3c1c(O)cc5)[C@]4(O)CCC2=O)CC1CC1	1e-06	0.36	6	5.64	8.48149	25	0.33926
CHEMBL2107687	[Br-].O(C(=O)C(C(CC)C)c1ccccc1)CC[N+](CC)(CC)C	2.485e-07	0.98	6.60467	5.62467	9.33624	23	0.405924
CHEMBL525607	o1nc(nc1-c1n[nH]c2c1cccc2)CN	1e-06	0.44	6	5.56	8.48149	16	0.530093
CHEMBL80	O1[C@@H]2[C@]34CCN([C@H](Cc5c3c1c(O)cc5)[C@]4(O)CCC2=O)CC=C	2e-06	0.16	5.69897	5.53897	8.05596	24	0.335665
CHEMBL382741	O(C[C@@H](O)CNC(Cc1cc2c(cc1)cccc2)(C)C)c1ccccc1C#N	1e-10	4.48	10	5.52	14.1358	28	0.504851
CHEMBL64894	[Cl-].[N+](C)(C)=C1C=CC(C=C1)=C(c1ccc(N(C)C)cc1)c1ccc(N(C)C)cc1	8.244e-07	0.63	6.08386	5.45386	8.60003	29	0.296553
CHEMBL1221512	S(=O)(=O)(CC[C@@H](NC(=O)[C@@H](OC[C@@H](NC[C@@H](N)CS)[C@H](CC)C)Cc1ccccc1)C(OC(C)C)=O)C	7e-07	0.77	6.1549	5.3849	8.70045	37	0.235147
CHEMBL511924	S(=O)(=O)(n1nc(c2c1cccc2)-c1onc(n1)CN)c1cc(OC)c(OC)cc1	2.9e-06	0.16	5.5376	5.3776	7.82785	29	0.269926
CHEMBL3091537	O1CCN(C[C@@H]1c1ccc(cc1)C#N)C1=NC(=CC(=O)N1C)c1ncncc1	4.5e-06	0	5.34679	5.34679	7.55812	28	0.269933
CHEMBL180672	Clc1cccc(OC[C@@H](O)CNC(Cc2cc3c(cc2)cccc3)(C)C)c1C#N	4.5e-11	5.11	10.3468	5.23679	14.626	29	0.504346
CHEMBL21578	O(C)c1cc2c(nccc2[C@H](O)[C@@H]2N3C[C@@H](C(C2)CC3)C=C)cc1	1e-08	2.79	8	5.21	11.3087	24	0.471194
CHEMBL484345	S(=O)(=O)(n1ncc2c1cccc2NC(=O)CCN)c1c2c(ccc1)cccc2	2e-07	1.52	6.69897	5.17897	9.46954	28	0.338198
CHEMBL521589	O(C(=O)N(C)C)c1cc(cc(OC(=O)N(C)C)c1)C(O)CNC(C)(C)C	2e-06	0.56	5.69897	5.13897	8.05596	26	0.309845
CHEMBL157138	O=C(N[C@H]1C=C2[C@H](N(C1)C)Cc1c3c2cccc3[nH]c1)N(CC)CC	1.6e-08	2.67	7.79588	5.12588	11.0201	25	0.440804
CHEMBL192677	O=C(N([C@H](CN1CCCC1)c1ccccc1)C)Cc1ccccc1CN	1.8e-08	2.63	7.74473	5.11473	10.9478	26	0.421069
CHEMBL2021577	O(C[C@H]1[C@@H]2CNC[C@]12C)CC	4e-06	0.29	5.39794	5.10794	7.63043	11	0.693675
CHEMBL467496	o1nc(nc1-c1nn(c2c1cccc2)Cc1ccc(cc1)C(=O)N)CN	1.3e-06	0.81	5.88606	5.07606	8.32042	26	0.320016
CHEMBL572163	O(C[C@@H](O)CNC(Cc1cc2c(cc1)cccc2)(C)C)c1ccc(cc1)CCC(O)=O	5.2e-08	2.21	7.284	5.074	10.2965	31	0.332146
CHEMBL361646	S(=O)(=O)(C)c1ccccc1OCC(O)CNC(Cc1[nH]c2c(c1)cccc2)(C)C	1.1e-07	1.9	6.95861	5.05861	9.83656	29	0.339192
CHEMBL378821	O=C(Nc1ncccn1)N1CCC(CC1)Cc1nc[nH]c1	6e-06	0.24	5.22185	4.98185	7.38151	21	0.3515
CHEMBL1909073	[Br-].O(C(=O)C(O)(c1ccccc1)c1ccccc1)CC[N+]1(CCCCC1)CC	5.21e-07	1.31	6.28316	4.97316	8.88176	28	0.317206
CHEMBL1089	N(N)CCc1ccccc1	1e-06	1.03	6	4.97	8.48149	10	0.848149
CHEMBL539685	O=C(N([C@H](CN1CCCC1)c1ccccc1)C)Cc1ccccc1CNC(=O)C	3.5e-08	2.49	7.45593	4.96593	10.5396	29	0.363433
CHEMBL1201356	OC[C@@H](NC(=O)[C@@H]1C=C2[C@H](N(C1)C)Cc1c3c2cccc3[nH]c1)CC	2e-07	1.76	6.69897	4.93897	9.46954	25	0.378782
CHEMBL1933536	Clc1cc2cc([nH]c2cc1)C(=O)N1C[C@]2(CCN(C2)C2CCNC2)c2c1cccc2	1.4e-08	2.92	7.85387	4.93387	11.1021	30	0.37007
CHEMBL2096628	S(O)(O)(=O)=O.O.O.O(C)c1cc2c(nccc2[C@H](O)[C@@H]2N3C[C@@H](C(C2)CC3)C=C)cc1.O(C)c1cc2c(nccc2[C@H](O)[C@@H]2N3C[C@@H](C(C2)CC3)C=C)cc1	2e-08	2.79	7.69897	4.90897	10.8831	55	0.197875
CHEMBL1169916	O(CCC1N(CCNC1)c1cc2c([nH]nc2)cc1)C	2.2e-07	1.75	6.65758	4.90758	9.41103	19	0.495317
CHEMBL270666	O(C[C@@H](n1nnnc1[C@H](NC(=O)C(N)(C)C)COCc1ccccc1)CC#N)c1ccccc1O	5.1e-06	0.5	5.29243	4.79243	7.48128	35	0.213751
CHEMBL482562	S(=O)(=O)(n1ncc2c1cc(NC(=O)C1CCNCC1)cc2)c1c2c(ccc1)cccc2	3.5e-07	1.69	6.45593	4.76593	9.12599	31	0.294387
CHEMBL94	O(C(=O)NC)c1cc2c(N([C@H]3N(CC[C@@]23C)C)C)cc1	2e-07	1.95	6.69897	4.74897	9.46954	20	0.473477
CHEMBL512079	o1nc(nc1-c1nn(c2c1cccc2)Cc1ccccc1)CN	9e-08	2.3	7.04576	4.74576	9.95975	23	0.433033
CHEMBL1222865	O=C1N(c2c(N1CCCN(C)C)cccc2)C1CCN(CC1)C(=O)C1CCN(CC1)Cc1ccncc1	1.6e-06	1.07	5.79588	4.72588	8.19295	37	0.221431
CHEMBL377500	s1ccnc1NC(=O)N1CCC(CC1)Cc1nc[nH]c1	2e-06	1.01	5.69897	4.68897	8.05596	20	0.402798
CHEMBL3265338	Clc1cc(cnc1)-c1cc2c(O[C@H]3[C@@H](CCOC3)[C@]23N=C(OC3)N)cc1	4.2e-07	1.7	6.37675	4.67675	9.01406	26	0.346694
CHEMBL230607	s1ccnc1NC(=O)CC(=O)N([C@H](CN1C[C@@H](O)CC1)c1ccccc1)C	7e-07	1.48	6.1549	4.6749	8.70045	27	0.322239
CHEMBL3091538	O1CCN(C[C@@H]1c1ccc(OC)cc1)C1=NC(=CC(=O)N1C)c1ncncc1	6.9e-06	0.49	5.16115	4.67115	7.29571	28	0.260561
CHEMBL1091778	s1c2c(cccc2)c([C@@H](C)c2cccnc2)c1CCN(C)C	2e-09	4.06	8.69897	4.63897	12.2967	22	0.558941
CHEMBL1778865	Fc1cc(OC)c(cc1)-c1nc(cnc1)CNCC1CC1	3.8e-07	1.82	6.42022	4.60022	9.0755	21	0.432167
CHEMBL201283	S(=O)(=O)(NCc1ccccc1NCC(=O)N([C@H](CN1C[C@@H](O)CC1)c1ccccc1)C)C	1.5e-06	1.24	5.82391	4.58391	8.23257	32	0.257268
CHEMBL181322	S(=O)(=O)(C)c1ccc(OCC(O)CNC(Cc2[nH]c3c(c2)cccc3)(C)C)cc1C	4e-08	2.82	7.39794	4.57794	10.4576	30	0.348586
CHEMBL2070947	s1c2cc(S(=O)(=O)C)ccc2nc1N1CCN(CC1)C(=O)[C@@H]1CCCC[C@H]1C(=O)NC1(CC1)C#N	6.3096e-07	1.67	6.2	4.53	8.7642	35	0.250406
CHEMBL520129	S(=O)(=O)(n1ncc2c1cc(NC(=O)C1CCCNC1)cc2)c1c2c(ccc1)cccc2	1.1e-07	2.45	6.95861	4.50861	9.83656	31	0.317308
CHEMBL1093044	s1c2c(cccc2)c([C@@H](C)c2ncccc2)c1CCNC	9.8e-09	3.53	8.00877	4.47877	11.3211	21	0.539098
CHEMBL426596	O(CC(O)CNC(Cc1c2cc(O)ccc2[nH]c1)(C)C)c1ccccc1C#N	8e-08	2.63	7.09691	4.46691	10.0321	28	0.358288
CHEMBL3091543	Fc1cc(ccc1[C@@H]1OCCN(C1)C1=NC(=CC(=O)N1C)c1ncncc1)C#N	2.67e-05	0.14	4.57349	4.43349	6.465	29	0.222931
CHEMBL200382	Fc1cc(NC(=O)CCN2CCC(CC2)Cc2nc[nH]c2)ccc1	1e-07	2.64	7	4.36	9.89507	24	0.412295
CHEMBL230394	S(=O)(=O)(NCc1ccc(NC(=O)CC(=O)N([C@H](CN2C[C@@H](O)CC2)c2ccccc2)C)cc1)C	5.4e-06	0.91	5.26761	4.35761	7.44619	34	0.219006
CHEMBL559601	Fc1cc(F)c(F)cc1C[C@@H](N)CC(=O)N1CCC[C@H]1CN(C(=O)C(F)(F)C)C	1e-07	2.67	7	4.33	9.89507	29	0.341209
CHEMBL549581	Fc1cc(F)c(F)cc1C[C@@H](N)CC(=O)N1CCC[C@H]1CNc1ncc(F)cn1	1e-07	2.69	7	4.31	9.89507	29	0.341209
CHEMBL3091540	O1CCN(C[C@@H]1c1ccccc1OC)C1=NC(=CC(=O)N1C)c1ncncc1	1.6e-05	0.49	4.79588	4.30588	6.77937	28	0.24212
CHEMBL200267	O(CCCN1CCC(CC1)Cc1nc[nH]c1)c1ccccc1	3e-08	3.23	7.52288	4.29288	10.6342	22	0.483373
CHEMBL192734	O=C(N([C@H](CN1CCCC1)c1ccccc1)C)Cc1cc(ccc1)CN	1.07e-07	2.68	6.97062	4.29062	9.85353	26	0.378982
CHEMBL2069806	S(=O)(=O)(Cc1oc(nn1)C(=O)NC1CCCCC1)c1ccccc1	2e-05	0.41	4.69897	4.28897	6.64238	24	0.276766
CHEMBL371916	S(=O)(=O)(Nc1c2O[C@@H](Cc2ccc1)C(=O)N([C@H](CN1C[C@@H](O)CC1)c1ccccc1)C)C	1.1e-06	1.67	5.95861	4.28861	8.42298	32	0.263218
CHEMBL2436633	FC1(CCN(CC1)Cc1cc(ncc1)N)C(=O)N1CCC(N2Cc3c(-c4c(C2)cccc4)cccc3)CC1	3e-07	2.25	6.52288	4.27288	9.22062	38	0.242648
CHEMBL1170213	O(CC1N(CCNC1)c1cc2c([nH]nc2)cc1)CC	7e-07	1.89	6.1549	4.2649	8.70045	19	0.457919
CHEMBL456807	N(N)c1ccccc1	3e-06	1.26	5.52288	4.26288	7.80704	8	0.97588
CHEMBL3265335	Clc1cc(cnc1)-c1cc2c(O[C@@H]3[C@H](CCOC3)[C@@]23N=C(OC3)N)cc1	1.1e-06	1.7	5.95861	4.25861	8.42298	26	0.323961
CHEMBL200865	S(=O)(=O)(Nc1c2O[C@@H](Cc2ccc1)C(=O)N([C@H](CN1C[C@@H](O)CC1)c1ccccc1)C)C	1.2e-06	1.67	5.92082	4.25082	8.36956	32	0.261549
CHEMBL113018	O1CCN(CC1)CCOc1ccc(-n2ccnc2)cc1	3.99e-07	2.16	6.39903	4.23903	9.04555	20	0.452277
CHEMBL504479	O(CC(O)CNC(Cc1ccc(OC)cc1)(C)C)c1ccccc1C#N	3.6e-08	3.22	7.4437	4.2237	10.5223	26	0.404703
CHEMBL550063	O1c2c(cccc2)C(=CC12CCNCC2)c1ccc(cc1)C(=O)N	4.4e-07	2.14	6.35655	4.21655	8.9855	24	0.374396
CHEMBL382497	O1c2c(CC1C(=O)N([C@H](CN1C[C@@H](O)CC1)c1ccccc1)C)cc(NC(=O)C)cc2	7.7e-07	1.91	6.11351	4.20351	8.64194	31	0.278772
CHEMBL1909725	s1cc(nc1NCCCCCNS(=O)(=O)N(C)C)-c1ncccc1	9.5e-07	1.83	6.02228	4.19228	8.51298	24	0.354707
CHEMBL371730	Clc1ccc(NC(=O)CCN2CCC(CC2)Cc2nc[nH]c2)cc1	4e-08	3.21	7.39794	4.18794	10.4576	24	0.435733
CHEMBL2407717	S1C[C@@H](N=C1NCc1ccc(cc1)C(=O)Nc1ccccc1N)c1ccccc1	8e-08	2.91	7.09691	4.18691	10.0321	29	0.345933
CHEMBL364907	S(=O)(=O)(NCc1ccccc1CC(=O)N([C@H](CN1CCCC1)c1ccccc1)C)C	2.95e-07	2.35	6.53018	4.18018	9.23094	30	0.307698
CHEMBL551412	O1c2c(cccc2)C(=CC12CCNCC2)c1ccc(cc1)C(=O)NCC	8.9e-08	2.88	7.05061	4.17061	9.96661	26	0.383331
CHEMBL182195	S(=O)(=O)(C)c1ccc(OCC(O)CNC(Cc2[nH]c3c(c2)cccc3)(C)C)cc1	3.5e-07	2.32	6.45593	4.13593	9.12599	29	0.314689
CHEMBL181895	O(CC(O)CNC(Cc1c2c([nH]c1)cccc2)(C)C)c1ccc(cc1C#N)CCC(O)=O	1.2e-05	0.79	4.92082	4.13082	6.95598	32	0.217374
CHEMBL394864	Fc1cc(N2C[C@@H](OC2=O)Cn2nncc2)ccc1-c1cccnc1	6.6e-06	1.05	5.18046	4.13046	7.323	25	0.29292
CHEMBL1257607	O(C1CCN(CC1)C(C)C)c1cc2c(n3c(c2)C(=O)N(CC3)CCO)cc1	9e-07	1.94	6.04576	4.10576	8.54617	27	0.316525
CHEMBL230984	Fc1cc(F)c(F)cc1[C@H]1CCN(C[C@@H]1N)c1ncncc1.FC(F)(F)C(O)=O	9.5e-07	1.93	6.02228	4.09228	8.51298	29	0.293551
CHEMBL3091464	O1CCN(C[C@@H]1c1cc(OC)ccc1)C1=NC(=CC(=O)N1C)c1ncncc1	2.66e-05	0.49	4.57512	4.08512	6.4673	28	0.230975
CHEMBL206345	O(C1CC2[N+](C(C1)CC2)(C)C)C1c2c(C=Cc3c1cccc3)cccc2	6e-05	0.14	4.22185	4.08185	5.96793	26	0.229536
CHEMBL178090	o1c(ccc1CN)-c1cccnc1	1.13e-05	0.87	4.94692	4.07692	6.99288	13	0.537914
CHEMBL559940	S(=O)(=O)(C)c1cc2nc3n(C[C@@H](N)[C@@H](C3)c3cc(F)c(F)cc3F)c2cc1.FC(F)(F)C(O)=O	1.5e-06	1.75	5.82391	4.07391	8.23257	34	0.242134
CHEMBL202591	O[C@H]1CCN(C1)C[C@@H](N(C(=O)CN(C(=O)C)c1ccccc1)C)c1ccccc1	3e-07	2.45	6.52288	4.07288	9.22062	29	0.317952
CHEMBL1672622	O=C(Nc1nc(c(nc1)-c1ccncc1)-c1ccncc1)C1CC1	5e-06	1.24	5.30103	4.06103	7.49344	24	0.312227
CHEMBL199111	S(=O)(=O)(NC)c1cc2CCC(Oc2cc1)C(=O)N([C@H](CN1C[C@@H](O)CC1)c1ccccc1)C	3.2e-07	2.44	6.49485	4.05485	9.181	33	0.278212
CHEMBL1222800	O=C1N(c2c(N1CCN(C)C)cccc2)C1CCN(CC1)C(=O)C1CCN(CC1)Cc1ccncc1	1.05e-05	0.93	4.97881	4.04881	7.03795	36	0.195499
CHEMBL321582	O(CC(O)CNC(Cc1c2c([nH]c1)cccc2)(C)C)c1ccccc1C#N	5e-08	3.29	7.30103	4.01103	10.3206	27	0.382244
CHEMBL597032	FC(F)(F)CCN1C[C@H]2[C@H](CC(N(C(=O)c3ncn(c3)C)Cc3cc(OC(F)(F)F)ccc3)C2)C1	1e-07	3	7	4	9.89507	35	0.282716
CHEMBL95499	O(CC(O)CNC(Cc1c2c([nH]c1)cccc2)(C)C)c1ccccc1	3e-08	3.54	7.52288	3.98288	10.6342	25	0.425368
CHEMBL317164	O(CC(O)CNC(Cc1c2cc(OC)ccc2[nH]c1)(C)C)c1ccccc1C#N	5e-08	3.32	7.30103	3.98103	10.3206	29	0.355883
CHEMBL3091541	Fc1cc(OC)c(cc1)[C@@H]1OCCN(C1)C1=NC(=CC(=O)N1C)c1ncncc1	1.8e-05	0.77	4.74473	3.97473	6.70706	29	0.231278
CHEMBL454675	O([C@H]1c2c(C[C@@]1(O)CNC)cccc2)c1ccccc1OC	5e-07	2.34	6.30103	3.96103	8.90702	22	0.404864
CHEMBL197123	S(=O)(=O)(N)c1cc2CCC(Oc2cc1)C(=O)N([C@H](CN1C[C@@H](O)CC1)c1ccccc1)C	1.8e-06	1.79	5.74473	3.95473	8.12064	32	0.25377
CHEMBL230393	S(=O)(=O)(Nc1ccc(NC(=O)CC(=O)N([C@H](CN2C[C@@H](O)CC2)c2ccccc2)C)cc1)C	1e-05	1.05	5	3.95	7.06791	33	0.214179
CHEMBL191987	S(=O)(=O)(Nc1ccc(cc1)CC(=O)N([C@H](CN1C[C@@H](O)CC1)c1ccccc1)C)C	5.526e-06	1.33	5.25759	3.92759	7.43203	30	0.247734
CHEMBL153479	Brc1cc(Br)cc(CNC2CCC(O)CC2)c1N	5.574e-07	2.33	6.25383	3.92383	8.8403	18	0.491128
CHEMBL1171425	O(CC1N(CCNC1)c1cc2c([nH]nc2)cc1)C	4e-06	1.5	5.39794	3.89794	7.63043	18	0.423913
CHEMBL245687	O1CCC(N(Cc2ccccc2-c2ccccc2)[C@H]2CCNC2)CC1	1e-07	3.11	7	3.89	9.89507	25	0.395803
CHEMBL1080339	O1c2c(ccc(OC)c2)C(=CC1=O)CNC	1e-05	1.11	5	3.89	7.06791	16	0.441744
CHEMBL192704	Clc1sc(N2C[C@@]3(OC2=O)C2CCN(C3)CC2)cc1	2e-06	1.81	5.69897	3.88897	8.05596	19	0.423998
CHEMBL1224165	Fc1cc(cc2c1[nH]cc2)C(=O)C1(NCCC1)CCC	3e-08	3.65	7.52288	3.87288	10.6342	20	0.53171
CHEMBL86	Clc1cc(C(=O)NCCN(CC)CC)c(OC)cc1N	8e-07	2.23	6.09691	3.86691	8.61848	20	0.430924
CHEMBL550669	O1c2c(cccc2)C(=CC12CCNCC2)c1oc(cc1)C(=O)N(CC)CC	6.4e-07	2.33	6.19382	3.86382	8.75547	27	0.324277
CHEMBL198920	O1c2c(C[C@@H]1C(=O)N([C@H](CN1C[C@@H](O)CC1)c1ccccc1)C)cccc2	2.5e-07	2.74	6.60206	3.86206	9.33255	27	0.34565
CHEMBL441124	S(=O)(=O)(NCc1ccc(NCC(=O)N([C@H](CN2C[C@@H](O)CC2)c2ccccc2)C)cc1)C	8e-06	1.24	5.09691	3.85691	7.2049	32	0.225153
CHEMBL395426	s1cc(cc1)-c1ncnc(N2CC(c3cc(F)c(F)cc3F)C(N)C2)c1	9.8e-08	3.16	7.00877	3.84877	9.90747	26	0.381057
CHEMBL3110021	o1cncc1-c1ccc(cc1)[C@@H]1[C@H]([C@H]1C(=O)NO)c1ccccc1	2.7e-06	1.73	5.56864	3.83864	7.87172	24	0.327988
CHEMBL1172525	[nH]1ncc2cc(N3CCNCC3CCCC)ccc12	4e-08	3.56	7.39794	3.83794	10.4576	19	0.550399
CHEMBL1933550	Fc1cc2[nH]c(cc2cc1)C(=O)N1C[C@]2(CCN(C2)C2CCNC2)c2c1cccc2	6.55e-07	2.35	6.18376	3.83376	8.74125	30	0.291375
CHEMBL2105617	OC1N2C3C4C(CC2C2N(c5c(C2(C3)[C@@H]4O)cccc5)C)C1CC	1e-06	2.17	6	3.83	8.48149	24	0.353395
CHEMBL114297	O(CCCN(C)C)c1ccc(-n2ccnc2)cc1	4e-07	2.57	6.39794	3.82794	9.04401	18	0.502445
CHEMBL204650	S(=O)(=O)(NCc1cc(NCC(=O)N([C@H](CN2C[C@@H](O)CC2)c2ccccc2)C)ccc1)C	8.7e-06	1.24	5.06048	3.82048	7.1534	32	0.223544
CHEMBL179338	Fc1cc(C#N)c(OCC(O)CNC(Cc2c3c([nH]c2)cccc3)(C)C)cc1	5e-08	3.49	7.30103	3.81103	10.3206	28	0.368593
CHEMBL189257	O=C(N([C@H](CN1CCCC1)c1ccccc1)C)Cc1ccc(cc1)CN	3.26e-07	2.68	6.48678	3.80678	9.16959	26	0.352677
CHEMBL1222650	O=C1N(c2c(N1CC(C)C)cccc2)C1CCN(CC1)C(=O)C1CCN(CC1)Cc1ccncc1	1.9e-06	1.92	5.72125	3.80125	8.08745	35	0.23107
CHEMBL3091539	Fc1ccccc1[C@@H]1OCCN(C1)C1=NC(=CC(=O)N1C)c1ncncc1	3.24e-05	0.71	4.48946	3.77945	6.34621	27	0.235045
CHEMBL2419505	S(=O)(=O)(c1ccc(cc1)CNC(=O)N1Cc2c(C1)cncc2)c1ccccc1	5e-06	1.53	5.30103	3.77103	7.49344	28	0.267623
CHEMBL1171975	[nH]1ncc2cc(N3CCNCC3Cc3ccccc3)ccc12	5e-08	3.54	7.30103	3.76103	10.3206	22	0.469118
CHEMBL1754	O1CCN(CC1)CCC1CN(CC)C(=O)C1(c1ccccc1)c1ccccc1	1e-07	3.24	7	3.76	9.89507	28	0.353395
CHEMBL1909065	O1[C@@H]([C@H](C[C@@H](C)[C@]1(O)C)C)[C@@H]1O[C@@H]([C@]2(O[C@H](CC2)[C@]2(O[C@]3(O[C@H]([C@@H](C)[C@@H]4O[C@](O)(CC(O)=O)[C@@H](C)[C@H](OC)[C@H]4OC)[C@H](C)[C@@H](O)C3)CC2)C)C)[C@@H](O[C@H]2O[C@@H](C)[C@H](OC)[C@@H](OC)C2)C1	1e-06	2.24	6	3.76	8.48149	64	0.132523
CHEMBL325429	O(CCN(C)C)c1ccc(-n2ccnc2)cc1	1.05e-06	2.22	5.97881	3.75881	8.45154	17	0.497149
CHEMBL101168	n1nn(N)c2c1cccc2	1.05e-05	1.23	4.97881	3.74881	7.03795	10	0.703795
CHEMBL499	s1nc(N2CCOCC2)c(OC[C@@H](O)CNC(C)(C)C)n1	1.1e-05	1.21	4.95861	3.74861	7.0094	21	0.333781
CHEMBL1077735	S(=O)(=O)(Cc1cc2CCNCCc2cc1)c1ccc(nc1)N1CCOCC1	1.6e-05	1.06	4.79588	3.73588	6.77937	27	0.251088
CHEMBL169901	NC(=N)N1CCc2c(C1)cccc2	2.38e-05	0.89	4.62342	3.73342	6.53558	13	0.502737
CHEMBL1760324	Fc1c(cc(cc1C)C[C@H](CCCCNCc1ccc(F)cc1)C(=O)NO)C	2e-08	3.97	7.69897	3.72897	10.8831	28	0.388683
CHEMBL397475	s1ccnc1NC(=O)CCC(=O)N([C@H](CN1C[C@@H](O)CC1)c1ccccc1)C	3.4e-06	1.74	5.46852	3.72852	7.7302	28	0.276079
CHEMBL1801172	S(=O)(=O)(NC1[C@H]2[C@@H]1CN(C2)c1ncc(cn1)C(=O)NO)c1cc2c(cc1)cccc2	1e-05	1.28	5	3.72	7.06791	30	0.235597
CHEMBL1088572	P(OC1C=C(Nc2c1cc1OCOc1c2)c1ccccc1F)(O)(=O)[O-].[Na+]	3.22e-06	1.79	5.49214	3.70214	7.76359	26	0.2986
CHEMBL463246	O1C[C@H]2[C@@H](Cc3cc(OC)c(O)cc3[C@@H]2c2cc(OC)c(O)cc2)C1=O	1.77e-05	1.06	4.75203	3.69203	6.71738	26	0.258361
CHEMBL3091536	Fc1ccc(cc1)[C@@H]1OCCN(C1)C1=NC(=CC(=O)N1C)c1ncncc1	3.97e-05	0.71	4.40121	3.69121	6.22147	27	0.230425
CHEMBL192964	O=C(N([C@H](CN1CCCC1)c1ccccc1)C)Cc1cc(ccc1)CNC(=O)C	6e-07	2.54	6.22185	3.68185	8.79509	29	0.303279
CHEMBL564105	Fc1cc(F)c(F)cc1C[C@@H](N)CC(=O)N1CCC[C@H]1CN(C(=O)C1CC1)C	1.1e-06	2.28	5.95861	3.67861	8.42298	28	0.300821
CHEMBL380990	S(=O)(=O)(Nc1cc2C[C@H](Oc2cc1)C(=O)N([C@H](CN1C[C@@H](O)CC1)c1ccccc1)C)C	4.5e-06	1.67	5.34679	3.67679	7.55812	32	0.236191
CHEMBL1684585	s1cc(nc1N)CC(=O)Nc1ccc(cc1)C[C@H]1N[C@H](CC1)[C@H](O)c1ccccc1	2.2e-06	2	5.65758	3.65758	7.99745	30	0.266582
CHEMBL3265337	Clc1cc(cnc1)-c1cc2c(O[C@@H]3[C@H](CCOC3)[C@]23N=C(OC3)N)cc1	4.5e-06	1.7	5.34679	3.64679	7.55812	26	0.290697
CHEMBL250262	s1c(C(=O)C)c(nc1NC(=O)N[C@@H]1CCN(C[C@H]1CN1C[C@@H](CCC1)Cc1ccc(F)cc1)C(=O)C(C)C)C	5e-08	3.66	7.30103	3.64103	10.3206	39	0.264631
CHEMBL435551	O(CC(O)CN(C(Cc1[nH]c2c(c1)cccc2)(C)C)C)c1ccccc1C#N	3e-08	3.89	7.52288	3.63288	10.6342	28	0.379793
CHEMBL180922	O(CC(O)CNC(Cc1[nH]c2c(c1)cccc2)(C)C)c1ccc(cc1)C#N	1.2e-07	3.29	6.92082	3.63082	9.78314	27	0.362339
CHEMBL610220	Clc1cc(ccc1Cl)C1([C@H]2[C@@H]1CNC2)COCC(F)(F)F	3e-07	2.9	6.52288	3.62288	9.22062	21	0.439077
CHEMBL377278	O(CCC(=O)N1CCC(CC1)Cc1nc[nH]c1)c1ccc(cc1)C(=O)N1CCNCC1	3e-05	0.9	4.52288	3.62288	6.39346	31	0.206241
CHEMBL1288288	Cl.Fc1cc(Cn2c3c(N(CC)C(=O)N(C)C3=O)cc2N2C[C@@](N)(CCC2)C)c(cc1)C#N	4e-07	2.78	6.39794	3.61794	9.04401	33	0.274061
CHEMBL1801238	Clc1ccc(cc1)CNC1[C@H]2[C@@H]1CN(C2)c1ncc(cn1)C(=O)NO	1e-05	1.39	5	3.61	7.06791	25	0.282716
CHEMBL94734	O=C(N([C@H](CN1CCCC1)c1ccccc1)C)Cc1ccccc1	4.6e-08	3.73	7.33724	3.60724	10.3718	24	0.432158
CHEMBL1221429	O=C(NC)c1ccc(cc1)C(N1CCCN(CC1)C1CCC1)c1nnnn1Cc1ccccc1	1.4e-06	2.25	5.85387	3.60387	8.27492	34	0.24338
CHEMBL115769	Fc1ccc(cc1)-c1nc-2[nH]c(N)cc(OC)c-2c1-c1ccncc1	2e-07	3.1	6.69897	3.59897	9.46954	25	0.378782
CHEMBL434933	S(=O)(=O)(Nc1cc2C[C@@H](Oc2cc1)C(=O)N([C@H](CN1C[C@@H](O)CC1)c1ccccc1)C)C	5.4e-06	1.67	5.26761	3.59761	7.44619	32	0.232693
CHEMBL429	Oc1ccc(cc1C(=O)N)C(O)CNC(CCc1ccccc1)C	8e-07	2.5	6.09691	3.59691	8.61848	24	0.359103
CHEMBL112592	O(Cc1ncccc1)c1ccc(-n2ccnc2)cc1	1.04e-06	2.39	5.98297	3.59297	8.45741	19	0.445127
CHEMBL201285	O[C@H]1CCN(C1)C[C@@H](N(C(=O)CNc1ccccc1C#N)C)c1ccccc1	5.1e-07	2.7	6.29243	3.59243	8.89486	28	0.317674
CHEMBL128729	O(C)c1cc(ccc1O)\C=C\C(=O)\C=C\c1cc(OC)c(O)cc1	6e-07	2.64	6.22185	3.58185	8.79509	24	0.366462
CHEMBL391806	Clc1c(cccc1Cl)CN(Cc1ncccc1)[C@H]1CCNC1	1e-07	3.42	7	3.58	9.89507	22	0.449776
CHEMBL1779003	Fc1cc(OC)c(cc1)-c1cc(cnc1)CNC1CCCC1	2.3e-07	3.06	6.63827	3.57827	9.38374	22	0.426534
CHEMBL562280	O1c2c(cccc2)C(=CC12CCNCC2)c1cnc(nc1)C(=O)N(CC)CC	2.1e-05	1.1	4.67778	3.57778	6.61242	28	0.236158
CHEMBL17350	OC1(CCN(CC1)[C@@H]([C@@H](O)c1ccc(O)cc1)C)c1ccccc1	4.25e-06	1.8	5.37161	3.57161	7.59321	24	0.316384
CHEMBL551413	O1c2c(cccc2)C(=CC12CCNCC2)c1ccc(cc1)C(=O)NC	1.2e-06	2.35	5.92082	3.57082	8.36956	25	0.334782
CHEMBL1222863	O=C1N(c2c(N1CCN1CCCCC1)cccc2)C1CCN(CC1)C(=O)C1CCN(CC1)Cc1ccncc1	3.7e-06	1.87	5.4318	3.5618	7.67829	39	0.196879
CHEMBL1935425	S1(=O)(=O)CCC(Oc2cc3CCC4(Oc3cc2)CCN(CC4)C2CCC2)CC1	6.6e-06	1.62	5.18046	3.56046	7.323	28	0.261536
CHEMBL605744	FC(F)(F)Oc1cc(ccc1)CN(C(=O)c1ncn(c1)C)C1C[C@@H]2[C@H](C1)CN(C2)CC(O)(C)C	1.1e-06	2.4	5.95861	3.55861	8.42298	34	0.247735
CHEMBL2203713	s1cccc1C(Nc1cc2CCN(c2cc1)C1CCNCC1)=N	7.5e-07	2.58	6.12494	3.54494	8.6581	23	0.376439
CHEMBL231397	Fc1cc(F)c(F)cc1[C@H]1CCN(C[C@@H]1N)C1=NN2C(=NC(=CC2=O)C)C=C1.FC(F)(F)C(O)=O	1.62e-05	1.25	4.79048	3.54048	6.77174	35	0.193478
CHEMBL1287844	Cl.Clc1ccc(F)cc1Cn1c2c(N(CCCO)C(=O)N(C)C2=O)cc1N1C[C@@](N)(CCC1)C	2e-07	3.16	6.69897	3.53897	9.46954	34	0.278516
CHEMBL2041178	O(C)c1ncnc(N2C3(CCN(CC3)Cc3ncccc3C)C(=O)N(c3ccc(cc3)-c3ccc(cc3)C(=O)NC)C2=O)c1	2.7e-06	2.03	5.56864	3.53864	7.87172	44	0.178903
CHEMBL3112967	Clc1cc(ccc1)C1(CCC(N2CCn3c(nnc3C(F)(F)F)C2=O)CC1)CN	4.5e-06	1.82	5.34679	3.52679	7.55812	29	0.260625
CHEMBL200589	O1c2c(CC[C@@H]1C(=O)N([C@H](CN1C[C@@H](O)CC1)c1ccccc1)C)cccc2	1.5e-07	3.3	6.82391	3.52391	9.64615	28	0.344505
CHEMBL400173	s1c(C(=O)C)c(nc1NC(=O)N[C@@H]1CCN(C[C@H]1CN1C[C@@H](CCC1)Cc1ccc(F)cc1)C(OC)=O)C	1e-08	4.48	8	3.52	11.3087	38	0.297596
CHEMBL1078463	S(=O)(=O)(Cc1cc2CCNCCc2cc1)c1ccc(nc1)N1CCCCC1	1.1e-06	2.44	5.95861	3.51861	8.42298	27	0.311962
CHEMBL1169733	[nH]1ncc2cc(N3CCNCC3c3ccccc3)ccc12	3e-07	3.01	6.52288	3.51288	9.22062	21	0.439077
CHEMBL595154	FC(F)(F)c1ccccc1OC1CCN(CC1)c1nnc(-n2ccnc2)cc1	3e-07	3.01	6.52288	3.51288	9.22062	28	0.329308
CHEMBL250436	s1c(C(=O)C)c(nc1NC(=O)N[C@@H]1CCN(C[C@H]1CN1C[C@@H](CCC1)Cc1ccc(F)cc1)C(=O)CC)C	1.4e-07	3.35	6.85387	3.50387	9.68851	38	0.254961
CHEMBL1917511	s1cc(nc1NC(=O)c1n(nc(c1)C(C)(C)C)Cc1ccccc1)CN	4e-07	2.9	6.39794	3.49794	9.04401	26	0.347847
CHEMBL212689	S(=O)(=O)(C)c1ccc(cc1)CC(=O)N(CC)C1CCN(CC1)CC[C@@H](c1cc(F)cc(F)c1)c1ccc(S(=O)(=O)C)cc1	1.6e-06	2.3	5.79588	3.49588	8.19295	43	0.190534
CHEMBL498482	O1Cc2c(cccc2)[C@H](Oc2cccc(C)c2C)[C@@H]1CNC	7e-08	3.67	7.1549	3.4849	10.114	22	0.459729
CHEMBL497171	[nH]1c2c(c3c1cccc3)c(ncc2)NCCCC	7.94e-09	4.62	8.10018	3.48018	11.4503	18	0.636126
CHEMBL1224492	Fc1cc(cc2c1[nH]cc2)C(=O)C1(CCNC1)CCCC	4e-08	3.92	7.39794	3.47794	10.4576	21	0.497981
CHEMBL1223236	n1nnn(Cc2ccccc2)c1C(N1CCCN(CC1)C1CCC1)c1ccc(cc1)Cn1ncnc1	6e-07	2.75	6.22185	3.47185	8.79509	36	0.244308
CHEMBL558647	S(=O)(=O)(N(C[C@H]1N(CCC1)C(=O)C[C@H](N)Cc1cc(F)c(F)cc1F)C1CC1)C(F)(F)F	1e-07	3.53	7	3.47	9.89507	32	0.309221
CHEMBL77675	N(C(Nc1ccccc1)=N)c1ccccc1	3.4443e-06	2.01	5.4629	3.4529	7.72225	16	0.482641
CHEMBL561805	O1c2c(cccc2)C(=CC12CCNCC2)c1ccc(cc1)C(=O)N(C)C	2.8e-06	2.1	5.55284	3.45284	7.84939	26	0.3019
CHEMBL2019026	S(Cc1ncccc1)c1[nH]c2c(n1)cc(N)cc2	2.17e-06	2.22	5.66354	3.44354	8.00588	18	0.444771
CHEMBL467519	o1nc(nc1-c1nn(c2c1cccc2)CCc1ccccc1)CN	1.32e-06	2.44	5.87943	3.43943	8.31105	24	0.346294
CHEMBL200441	S(=O)(=O)(NCc1cc2CC[C@@H](Oc2cc1)C(=O)N([C@H](CN1C[C@@H](O)CC1)c1ccccc1)C)C	3.9e-06	1.97	5.40894	3.43894	7.64597	34	0.224881
CHEMBL1169912	[nH]1ncc2cc(N3CCNC[C@@H]3CCC)ccc12	3.5e-07	3.03	6.45593	3.42593	9.12599	18	0.506999
CHEMBL1223235	n1nnn(Cc2ccccc2)c1C(N1CCCN(CC1)C1CCC1)c1ccc(-n2ncnc2)cc1	7e-07	2.73	6.1549	3.4249	8.70045	35	0.248584
CHEMBL562388	Fc1cc(F)c(F)cc1[C@H]1Cc2n(C[C@@H]1N)c1cccnc1n2.FC(F)(F)C(O)=O.FC(F)(F)C(O)=O	5.2e-06	1.86	5.284	3.424	7.46936	37	0.201875
CHEMBL231196	Fc1cc(F)c(F)cc1[C@H]1CCN(C[C@@H]1N)c1nc2nccnc2nc1.FC(F)(F)C(O)=O	1.16e-05	1.52	4.93554	3.41554	6.97679	33	0.211418
CHEMBL231497	Fc1cc(F)c(F)cc1[C@H]1CCN(C[C@@H]1N)C1=Nn2c(nnc2C)C=C1.FC(F)(F)C(O)=O	8.8e-06	1.64	5.05552	3.41552	7.14639	33	0.216557
CHEMBL359557	O=C(N([C@H](CN1CCCC1)c1ccccc1)C)Cc1ccc(cc1)CNC(=O)C	1.108e-06	2.54	5.95546	3.41546	8.41853	29	0.290294
CHEMBL397666	O=C1NC=CC(NCc2ncccc2)=C1c1[nH]c2c(n1)cc(-n1ccnc1)cc2C	5.7e-06	1.84	5.24413	3.40413	7.413	30	0.2471
CHEMBL2170635	FC(F)(F)c1cc(ccc1C1CCN(CC1)C(=O)c1ccncc1)C(=O)NC(N)=N	1.1e-05	1.56	4.95861	3.39861	7.0094	30	0.233647
CHEMBL178206	O(CC(O)CNC(Cc1[nH]c2c(c1)cccc2)(C)C)c1cc2ncnc(c2cc1OC)CC	4e-08	4	7.39794	3.39794	10.4576	33	0.316897
CHEMBL1819089	Cl.Fc1cc(Cn2c3c(N(C)C(=O)N(C)C3=O)cc2N2C[C@@H](N)CCC2)c(cc1)C#N	7.5e-06	1.73	5.12494	3.39494	7.24452	31	0.233694
CHEMBL585	n1c(N)c2nc(-c3ccccc3)c(nc2nc1N)N	1e-05	1.61	5	3.39	7.06791	19	0.371995
CHEMBL1204009	Cl.O(C[C@H](O)CNC(Cc1cc2c(cc1)cccc2)(C)C)c1ccc(cc1C#N)CCC(OCC)=O	3e-09	5.14	8.52288	3.38288	12.0478	36	0.334661
CHEMBL263664	Clc1ccc(cc1)CC1(N)CCN(CC1)c1ncnc2[nH]ccc12	6.6e-07	2.8	6.18046	3.38046	8.73658	24	0.364024
CHEMBL380991	O1c2c(C[C@H]1C(=O)N([C@H](CN1C[C@@H](O)CC1)c1ccccc1)C)cccc2	7.6e-07	2.74	6.11919	3.37919	8.64997	27	0.320369
CHEMBL559543	S(=O)(=O)(NC[C@H]1N(CCC1)C(=O)C[C@H](N)Cc1cc(F)c(F)cc1F)C	1.42e-05	1.47	4.84771	3.37771	6.85263	26	0.263563
CHEMBL326849	S1C2SC=CC2C=C1CN1C[C@H](N(CC1)C[C@@H](O)C[C@@H](Cc1ccncc1)C(=O)N[C@H]1c2c(OC[C@H]1O)cccc2)C(=O)NCC(F)(F)F	3.2e-06	2.12	5.49485	3.37485	7.76742	49	0.158519
CHEMBL378471	o1c2c(cc(cc2)C(=O)N[C@@H]2C3CCN(C2)CC3)cc1	3.6e-06	2.07	5.4437	3.3737	7.69511	20	0.384755
CHEMBL3115188	s1cncc1COC(=O)N[C@@H](Cc1ccccc1)CC[C@@H](NC(=O)[C@@H](NC(=O)N(Cc1nc(sc1)C(C)C)C)CCNC(=O)C)Cc1ccccc1	8e-07	2.73	6.09691	3.36691	8.61848	52	0.16574
CHEMBL2170638	FC(F)(F)c1cc(ccc1C1CCN(CC1)C(=O)c1ccc(cc1)C(=O)N)C(=O)NC(N)=N	1.2e-05	1.56	4.92082	3.36082	6.95598	33	0.210787
CHEMBL440203	O(CC(O)CNC(Cc1c2c([nH]c1)cccc2)(C)C)c1ccc(O)cc1C#N	3.1e-07	3.15	6.50864	3.35864	9.20049	28	0.328589
CHEMBL246519	Fc1c(F)c(F)ccc1CN([C@H]1CCNC1)C1CCOCC1	6.8e-06	1.81	5.16749	3.35749	7.30467	22	0.33203
CHEMBL246920	Clc1c(cccc1Cl)CN(CC1CC1)[C@H]1CCNC1	3e-08	4.17	7.52288	3.35288	10.6342	19	0.559695
CHEMBL2170607	FC(F)(F)c1cc(ccc1C1CCN(CC1)C(=O)C1CC1)C(=O)NC(N)=N	1.7e-05	1.42	4.76955	3.34955	6.74215	27	0.249709
CHEMBL1729	Clc1cc(C(=O)NC2CCN(CC2OC)CCCOc2ccc(F)cc2)c(OC)cc1N	7e-08	3.81	7.1549	3.3449	10.114	32	0.316064
CHEMBL190030	S(=O)(=O)(NCc1cc(ccc1)CC(=O)N([C@H](CN1CCCC1)c1ccccc1)C)C	1.82e-06	2.4	5.73993	3.33993	8.11386	30	0.270462
CHEMBL246634	Fc1ccc(cc1)C1(O)CCN(CC1)C(C(O)c1cc2OC(=O)Nc2cc1)C	1.1e-05	1.62	4.95861	3.33861	7.0094	28	0.250336
CHEMBL469946	s1cccc1[C@@]1(C[C@H]1CN)C(=O)N(CC(F)=C)CC	6e-06	1.9	5.22185	3.32185	7.38151	19	0.3885
CHEMBL399512	O(C)c1cc(ccc1O)[C@H]1c2cc(O)c(OC)cc2C[C@@H](CO)[C@@H]1CO	9.77e-05	0.7	4.01011	3.31011	5.66861	26	0.218023
CHEMBL562072	Fc1cc(F)c(F)cc1C[C@@H](N)CC(=O)N1CCC[C@H]1CNc1ncccc1C#N	7e-07	2.85	6.1549	3.3049	8.70045	30	0.290015
CHEMBL1170373	[nH]1ncc2cc(N3CCNCC3CCc3ccccc3)ccc12	6e-08	3.92	7.22185	3.30185	10.2087	23	0.443855
CHEMBL511	O(C)c1ccc(cc1)CN(CCN(C)C)c1ncccc1	3e-07	3.23	6.52288	3.29288	9.22062	21	0.439077
CHEMBL2069805	S(=O)(=O)(Cc1nc(on1)C(=O)NC1CCCCC1)c1ccccc1	2e-05	1.41	4.69897	3.28897	6.64238	24	0.276766
CHEMBL1672611	o1cccc1-c1nc(NC(=O)C2CC2)cnc1-c1ccncc1	5e-06	2.02	5.30103	3.28103	7.49344	23	0.325802
CHEMBL231293	Fc1cc(F)c(F)cc1[C@H]1CCN(C[C@@H]1N)C1=Nn2nc(nc2C=C1)C(F)(F)F.FC(F)(F)C(O)=O	1e-07	3.72	7	3.28	9.89507	36	0.274863
CHEMBL178516	[nH]1cc(nc1)-c1cccnc1	9.8e-05	0.73	4.00877	3.27877	5.66673	11	0.515157
CHEMBL514232	S(=O)(=O)(N(Cc1ccccc1-c1ccccc1)[C@H]1CCNC1)N(C)C	8.4e-07	2.8	6.07572	3.27572	8.58853	25	0.343541
CHEMBL230502	O[C@H]1CCN(C1)C[C@@H](N(C(=O)NCC(=O)Nc1ccccc1)C)c1ccccc1	5.1e-06	2.02	5.29243	3.27243	7.48128	29	0.257975
CHEMBL1270110	O(C(=O)N1C[C@@H](Nc2ncc(cc2)C#N)CC1)C1C2CC3(CC1CC(C3)C2)C(=O)N	1.66e-05	1.51	4.77989	3.26989	6.75677	30	0.225226
CHEMBL498142	O1C[C@@H](CNC)[C@@H](Oc2ccccc2C)c2c1cccc2	1.8e-07	3.48	6.74473	3.26473	9.53422	21	0.454011
CHEMBL466496	O=C1C(=O)C(N[C@@H](C)c2ccccc2)=C1Nc1ccncc1	3.3e-06	2.22	5.48149	3.26149	7.74853	22	0.352206
CHEMBL523475	Clc1cccc(OCC(O)CNC(Cc2ccc(OC)cc2)(C)C)c1C#N	7.6e-08	3.86	7.11919	3.25919	10.0635	27	0.372724
CHEMBL1224563	Fc1cc(cc2c1[nH]cc2)C(=O)C1(CCNC1)Cc1ccccc1	7e-08	3.9	7.1549	3.2549	10.114	24	0.421418
CHEMBL588619	O[C@H]([C@@H]1N2C[C@@H]([C@H](C1)CC2)C=C)c1c2c(ncc1)cccc2	1.8e-06	2.49	5.74473	3.25473	8.12064	22	0.36912
CHEMBL1762476	O(C)c1cc(O[C@@H](CCNC)c2ccccc2)c(cc1)C#N.OC(=O)C(O)=O	3e-07	3.27	6.52288	3.25288	9.22062	28	0.329308
CHEMBL95	n1c2c(CCCC2)c(N)c2c1cccc2	3e-07	3.27	6.52288	3.25288	9.22062	15	0.614708
CHEMBL230204	O=C1NC=CC(N[C@@H](Cc2ccccc2)CO)=C1c1[nH]c2c(n1)c(cc(-n1ccnc1)c2)C	5.6e-07	3.01	6.25181	3.24181	8.83745	33	0.267801
CHEMBL251274	s1c(C(=O)C)c(nc1NC(=O)N[C@@H]1CCN(C[C@H]1CN1C[C@@H](CCC1)Cc1ccc(F)cc1)C(=O)C1CC1)C	6e-08	3.99	7.22185	3.23185	10.2087	39	0.261761
CHEMBL1092651	Fc1cc2CC(CCN(C)C)=C(c2cc1)Cc1nccnc1OC	3.2e-07	3.27	6.49485	3.22485	9.181	24	0.382542
CHEMBL395288	O[C@H]1CCN(C1)C[C@@H](N(C(=O)CC(=O)NCc1ccccc1)C)c1ccccc1	3.2e-06	2.27	5.49485	3.22485	7.76742	29	0.267842
CHEMBL514759	O(C)c1cc(ccc1)CC1(CCNC1)c1cc2c([nH]cc2)cc1	1e-07	3.78	7	3.22	9.89507	23	0.43022
CHEMBL1642914	Clc1cc(ccc1Cl)[C@H]1c2c(CC[C@@H]1NC)cccc2	8e-09	4.89	8.09691	3.20691	11.4456	20	0.572282
CHEMBL1170374	[nH]1ncc2cc(N3CCNCC3CCC)ccc12	5.8e-07	3.03	6.23657	3.20657	8.8159	18	0.489772
CHEMBL497846	Fc1cccc(C)c1O[C@H]1c2c(CO[C@H]1CNC)cccc2	3.1e-07	3.31	6.50864	3.19864	9.20049	22	0.418204
CHEMBL498495	O1C[C@@H](CNC)[C@@H](Oc2ccccc2C)c2c1cccc2	2.1e-07	3.48	6.67778	3.19778	9.43959	21	0.449504
CHEMBL364208	Clc1ccc(cc1)CSCC(O)CN	8e-06	1.9	5.09691	3.19691	7.2049	14	0.514636
CHEMBL247538	O1CCC(N(Cc2cccc(OC)c2C)[C@H]2CCNC2)CC1	8.2e-06	1.89	5.08619	3.19619	7.18974	22	0.326806
CHEMBL457930	[nH]1c2c(cc(cc2)C2(CCNC2)Cc2ccccc2)cc1C#N	1e-07	3.81	7	3.19	9.89507	23	0.43022
CHEMBL1668114	O1C[C@H](Cc2cc(OC)c(O)cc2)[C@H](CO)[C@H]1c1cc(O)c(O)cc1	6.81e-05	0.98	4.16685	3.18685	5.89019	25	0.235607
CHEMBL2323775	S(=O)(=O)(NCc1ncccc1)Cc1cc2c(C=Cc3ncc(cc3C2=O)-c2cn(nc2)C)cc1	4.617e-05	1.15	4.33564	3.18564	6.12878	34	0.180258
CHEMBL512851	s1cccc1[C@@]1(C[C@H]1CN)C(=O)N(CC=C)CC=C	6e-06	2.04	5.22185	3.18185	7.38151	19	0.3885
CHEMBL1224491	Fc1cc(cc2c1[nH]cc2)C(=O)C1(CCNC1)COCC	4.1e-06	2.21	5.38722	3.17722	7.61527	21	0.362632
CHEMBL1092258	O(C)c1cc2CC(CCN(C)C)=C(c2cc1)Cc1nccnc1	5.3e-06	2.1	5.27572	3.17572	7.45767	23	0.324246
CHEMBL563495	Clc1c(OC([C@H]2CCNC2)c2ncccc2)cccc1Cl	6e-07	3.05	6.22185	3.17185	8.79509	21	0.418814
CHEMBL7154	O(CC(O)CNC(C)C)c1ccccc1	1.8e-05	1.58	4.74473	3.16473	6.70706	15	0.447137
CHEMBL564488	Fc1cc(F)c(F)cc1C[C@@H](N)CC(=O)N1CCC[C@H]1CNc1ncccn1	2.2e-06	2.5	5.65758	3.15758	7.99745	28	0.285623
CHEMBL180620	O(CC(O)CNC(Cc1[nH]c2c(c1)cccc2)(C)C)c1cc2c(ncnc2CC)cc1OC	7e-08	4	7.1549	3.1549	10.114	33	0.306486
CHEMBL510352	O1C[C@@H](CN)[C@@H](Oc2ccccc2C)c2c1cccc2	4.4e-07	3.21	6.35655	3.14655	8.9855	20	0.449275
CHEMBL1078461	S(=O)(=O)(Cc1cc2CCNCCc2cc1)c1ccc(OC(C)C)nc1	1.6e-06	2.66	5.79588	3.13588	8.19295	25	0.327718
CHEMBL13	O(CC(O)CNC(C)C)c1ccc(cc1)CCOC	2.4e-05	1.49	4.61979	3.12979	6.53045	19	0.343708
CHEMBL557860	Fc1cc(F)c(F)cc1C[C@@H](N)CC(=O)N1CCC[C@H]1CNC(=O)C(F)(F)C	3.9e-06	2.28	5.40894	3.12894	7.64597	28	0.27307
CHEMBL1078492	s1c(ccc1S(=O)(=O)Nc1cc2CCN(CCc2cc1)Cc1n[nH]cc1)-c1ncccc1	2e-07	3.59	6.69897	3.10897	9.46954	32	0.295923
CHEMBL1762478	Cl.Clc1cc(OC(CCNC)CC)c(cc1)C#N	4e-07	3.29	6.39794	3.10794	9.04401	18	0.502445
CHEMBL115876	O(CCCc1ncccc1)c1ccc(-n2ccnc2)cc1	6.2e-07	3.1	6.20761	3.10761	8.77496	21	0.417855
CHEMBL452861	O(C[C@@H](O)CNC(C)C)c1c2c(ccc1)cccc2	1.4e-06	2.75	5.85387	3.10387	8.27492	19	0.435522
CHEMBL192520	O=C(N([C@H](CN1CCCC1)c1ccccc1)C)Cc1ccc(cc1)CNC(=O)NC	1.22e-06	2.81	5.91364	3.10364	8.35941	30	0.278647
CHEMBL1224164	O=C(C1(NCCC1)CCC)c1cc2c([nH]cc2)cc1	3e-07	3.42	6.52288	3.10288	9.22062	19	0.485296
CHEMBL1223002	O(C)c1cc(ccc1)CN1c2c(N(C3CCN(CC3)C(=O)C3CCN(CC3)Cc3ccncc3)C1=O)cccc2	5.6e-06	2.15	5.25181	3.10181	7.42386	40	0.185597
CHEMBL1171007	O1CCC(CC1)C[C@H]1N(CCNC1)c1cc2c([nH]nc2)cc1	4.7e-06	2.23	5.3279	3.0979	7.53142	22	0.342337
CHEMBL456654	[nH]1c2c(cc(cc2)C2(CCNC2)Cc2ncccc2)cc1	3.5e-06	2.36	5.45593	3.09593	7.7124	21	0.367257
CHEMBL552069	Fc1cc(F)c(F)cc1C[C@@H](N)CC(=O)N1CCC[C@H]1CNC(=O)C1(CC1)C(F)(F)F	3.6e-06	2.35	5.4437	3.0937	7.69511	31	0.248229
CHEMBL1270001	O(C(=O)N1C[C@H](Nc2ncc(cc2)C#N)CC1)C1C2CC3(CC1CC(C3)C2)C(=O)N	2.5e-05	1.51	4.60206	3.09206	6.50539	30	0.216846
CHEMBL452429	Clc1ccccc1O[C@@H]1c2c(OC[C@@H]1CNC)cccc2	2e-07	3.61	6.69897	3.08897	9.46954	21	0.45093
CHEMBL213024	Brc1sc(N2C[C@]3(OC2=O)C2CCN(C3)CC2)cc1	9e-06	1.96	5.04576	3.08576	7.13259	19	0.375399
CHEMBL2397304	s1c(cnc1NC(=O)CN(C(=O)c1ccncc1)Cc1ccccc1)-c1ccc(nc1)N	2.6e-06	2.5	5.58503	3.08503	7.89489	32	0.246715
CHEMBL203306	O[C@H]1CCN(C1)C[C@@H](N(C(=O)CN(C)c1ccc(cc1)C#N)C)c1ccccc1	6.7e-07	3.09	6.17393	3.08393	8.72735	29	0.300943
CHEMBL1909072	Clc1cc2N(c3c(Sc2cc1)cccc3)CCCN1CCC(CC1)C(=O)N	1e-07	3.92	7	3.08	9.89507	27	0.366484
CHEMBL1669407	FCCN(CCC=1Cc2c(cccc2)C=1Cc1nccnc1)C	3.093e-06	2.43	5.50962	3.07962	7.7883	23	0.338622
CHEMBL1172526	[nH]1ncc2cc(N3CCNCC3CC(C)C)ccc12	3.1e-07	3.43	6.50864	3.07864	9.20049	19	0.484236
CHEMBL2403768	Clc1cc(Cl)cnc1C(=O)Nc1cc([C@]2(N=C(OCC2)N)C)c(F)cc1	9e-07	2.97	6.04576	3.07576	8.54617	26	0.328699
CHEMBL3091544	Clc1cccc(F)c1[C@@H]1OCCN(C1)C1=NC(=CC(=O)N1C)c1ncncc1	3.23e-05	1.42	4.4908	3.0708	6.34811	28	0.226718
CHEMBL199215	O1c2c(cc(NC(=O)C)cc2)CCC1C(=O)N([C@H](CN1C[C@@H](O)CC1)c1ccccc1)C	2.9e-06	2.47	5.5376	3.0676	7.82785	32	0.24462
CHEMBL178963	O(CC(O)CNC(Cc1c2c([nH]c1)cc(OC)cc2)(C)C)c1ccccc1C#N	4.2e-07	3.32	6.37675	3.05675	9.01406	29	0.31083
CHEMBL462384	S(C)c1ccccc1O[C@H]1c2c(C[C@@]1(O)CNC)cccc2	1.4e-06	2.8	5.85387	3.05387	8.27492	22	0.376133
CHEMBL442078	O=C(C(=O)N1CCN(C[C@H]1C)C(=O)c1ccccc1)c1c2cccnc2[nH]c1	1.7e-05	1.72	4.76955	3.04955	6.74215	28	0.240791
CHEMBL204742	O(CCCN1CCC(CC1)Cc1nc[nH]c1)c1ncc(cc1)C(=O)N1CCCCC1	2e-06	2.65	5.69897	3.04897	8.05596	30	0.268532
CHEMBL520869	[nH]1ncc2cc(ccc12)C1(CCNC1)Cc1ccccc1	4e-07	3.35	6.39794	3.04794	9.04401	21	0.430667
CHEMBL476313	S(=O)(=O)(N(Cc1ccccc1-c1ccccc1)[C@H]1CCNC1)CCC	1.85e-07	3.69	6.73283	3.04283	9.5174	25	0.380696
CHEMBL540359	[I-].Oc1cc(ccc1)C[N+]1(C[C@@H](NC(=O)[C@@H](NC(=O)Nc2ccc(cc2)C(OC(C)C)=O)Cc2ccc(O)cc2)CCC1)C	3.98107e-06	2.36	5.4	3.04	7.63334	44	0.173485
CHEMBL1085672	Clc1cc(N2CCN(CC3NCCCC3)C2=O)ccc1	1e-06	2.96	6	3.04	8.48149	20	0.424074
CHEMBL220360	Clc1ccc(cc1)C[C@@H]([C@@H](NC(=O)C(Oc1ncc(cc1)C(F)(F)F)(C)C)C)c1cc(ccc1)C#N	5.9e-10	6.19	9.22915	3.03915	13.0462	36	0.362393
CHEMBL198487	O1c2c(cc(NC(OC)=O)cc2)C[C@@H]1C(=O)N([C@H](CN1C[C@@H](O)CC1)c1ccccc1)C	4.2e-06	2.34	5.37675	3.03675	7.60047	32	0.237515
CHEMBL498481	O1C[C@@H](CNC)[C@@H](Oc2ccccc2CC)c2c1cccc2	9e-08	4.01	7.04576	3.03576	9.95975	22	0.452716
CHEMBL552127	Fc1cc(F)c(F)cc1C[C@@H](N)CC(=O)N1CCC[C@H]1CN(C)c1ncc(cc1)C#N	9e-07	3.01	6.04576	3.03576	8.54617	31	0.275683
CHEMBL230288	O[C@H]1CCN(C1)C[C@@H](N(C(=O)CC(=O)Nc1ccccc1)C)c1ccccc1	5.3e-06	2.24	5.27572	3.03572	7.45767	28	0.266345
CHEMBL604805	FC(F)(F)Oc1cc(ccc1)CN(C(=O)c1ncn(c1)C)C1C[C@@H]2[C@H](C1)CN(C2)CC	1.1e-06	2.93	5.95861	3.02861	8.42298	31	0.271709
CHEMBL552068	Cl.Fc1cc(F)c(F)cc1[C@H]1Cc2n(C[C@@H]1N)c1c(n2)cncc1	1.3e-05	1.86	4.88606	3.02606	6.90684	24	0.287785
CHEMBL562188	Fc1cc(F)c(F)cc1[C@H]1Cc2n(C[C@@H]1N)c1c(n2)cncc1.FC(F)(F)C(O)=O.FC(F)(F)C(O)=O	1.3e-05	1.86	4.88606	3.02606	6.90684	37	0.186671
CHEMBL400588	s1c(C(=O)C)c(nc1NC(=O)N[C@@H]1CCN(C[C@H]1CN1C[C@@H](CCC1)Cc1ccc(F)cc1)C(=O)C)C	1.4e-06	2.83	5.85387	3.02387	8.27492	37	0.223647
CHEMBL247838	Fc1ccc(cc1)C1(O)CCN(CC1)C(C(O)c1ccc(O)cc1C)C	3.9e-06	2.39	5.40894	3.01894	7.64597	26	0.294076
CHEMBL1201193	O=C(Nc1c(cccc1C)C)[C@H]1N(CCCC1)CCCC	1.964e-07	3.69	6.70686	3.01686	9.48069	21	0.451461
CHEMBL382932	O[C@H]1CCN(C1)C[C@@H](N(C(=O)CN(C)c1ccccc1)C)c1ccccc1	5.3e-07	3.26	6.27572	3.01572	8.87125	27	0.328565
CHEMBL1269895	O(C(=O)N1C[C@H](Nc2ncccc2C#N)CC1)C1C2CC3(CC1CC(C3)C2)C(=O)N	3e-05	1.51	4.52288	3.01288	6.39346	30	0.213115
CHEMBL1270002	O(C(=O)N1C[C@@H](Nc2ncccc2C#N)CC1)C1C2CC3(CC1CC(C3)C2)C(=O)N	3e-05	1.51	4.52288	3.01288	6.39346	30	0.213115
CHEMBL2170637	FC(F)(F)c1cc(ccc1C1CCN(CC1)C(=O)c1ncccc1)C(=O)NC(N)=N	2.7e-05	1.56	4.56864	3.00864	6.45814	30	0.215271
CHEMBL231294	Fc1cc(F)c(F)cc1[C@H]1CCN(C[C@@H]1N)C1=Nc2n(C=C1)cnn2.FC(F)(F)C(O)=O	2.06e-05	1.68	4.68613	3.00613	6.62423	32	0.207007
CHEMBL3091531	Fc1cnccc1C=1N=C(N(C)C(=O)C=1)N1C[C@@H](OCC1)c1ccc(F)cc1	2.21e-05	1.65	4.65561	3.00561	6.58108	28	0.235039
CHEMBL3091546	O1CCN(CC1c1ccccc1)C1=NC(=CC(=O)N1C)c1ccncc1	4.74e-05	1.32	4.32422	3.00422	6.11264	26	0.235102
CHEMBL513258	Fc1ccc(cc1)CC1(CCNC1)c1cc2c([nH]cc2)cc1	1e-07	4	7	3	9.89507	22	0.449776
CHEMBL559251	n1ccncc1CC=1c2c(CC=1CCN(C)C)cccc2	6.679e-06	2.18	5.17529	2.99529	7.31569	21	0.348366
CHEMBL165064	O1c2c(C(=O)C(OC)=C1c1ccc(O)cc1)c(O)cc(O)c2	4.63e-06	2.34	5.33442	2.99442	7.54064	22	0.342756
CHEMBL203912	O(CCC(=O)N1CCC(CC1)Cc1nc[nH]c1)c1ccc(cc1)CN1CCCCC1	1e-06	3.01	6	2.99	8.48149	30	0.282716
CHEMBL3091547	Fc1ccc(cc1)C1OCCN(C1)C1=NC(=CC(=O)N1C)c1ccncc1	3.58e-05	1.46	4.44612	2.98612	6.28495	27	0.232776
CHEMBL478835	S(=O)(=O)(N(Cc1ccccc1-c1ccccc1)[C@H]1CCNC1)C(C)C	3.5e-07	3.47	6.45593	2.98593	9.12599	25	0.365039
CHEMBL1224320	Fc1cc(cc2c1[nH]cc2)C(=O)C1(CCNC1)CCC(C)C	5e-08	4.32	7.30103	2.98103	10.3206	22	0.469118
CHEMBL2018913	S(CCCO)c1[nH]c2c(n1)cc(OC)cc2	4.17e-06	2.4	5.37986	2.97986	7.60488	16	0.475305
CHEMBL197126	O1c2c(cc(NC(OC)=O)cc2)C[C@H]1C(=O)N([C@H](CN1C[C@@H](O)CC1)c1ccccc1)C	4.8e-06	2.34	5.31876	2.97876	7.5185	32	0.234953
CHEMBL371685	S(=O)(=O)(Nc1cc2CCC(Oc2cc1)C(=O)N([C@H](CN1C[C@@H](O)CC1)c1ccccc1)C)C	6.2e-06	2.23	5.20761	2.97761	7.36138	33	0.223072
CHEMBL27	O(CC(O)CNC(C)C)c1c2c(ccc1)cccc2	1.9e-06	2.75	5.72125	2.97125	8.08745	19	0.425655
CHEMBL275742	O(C[C@@H](O)CNC(C)C)c1c2c(ccc1)cccc2	1.9e-06	2.75	5.72125	2.97125	8.08745	19	0.425655
CHEMBL361947	s1cc(c2c1cccc2)CC(NCC(O)COc1ccccc1C#N)(C)C	5e-08	4.33	7.30103	2.97103	10.3206	27	0.382244
CHEMBL462402	S(C1c2c(CC1(O)CNC)cccc2)c1ccccc1C	4e-07	3.43	6.39794	2.96794	9.04401	21	0.430667
CHEMBL170	O(C)c1cc2c(nccc2[C@@H](O)[C@H]2N3C[C@@H]([C@H](C2)CC3)C=C)cc1	1.8e-06	2.79	5.74473	2.95473	8.12064	24	0.33836
CHEMBL253528	o1c(ccc1C)-c1nc(NC(=O)COc2cc(nc(c2)C)C)cc(n1)-n1nc(cc1C)C	5e-08	4.35	7.30103	2.95103	10.3206	32	0.322519
CHEMBL1258754	O(C1CCN(CC1)C(C)C)c1cc2c(n3c(c2)C(=O)NCC3)cc1	4e-06	2.45	5.39794	2.94794	7.63043	24	0.317934
CHEMBL3115177	s1cncc1COC(=O)N[C@@H](Cc1ccccc1)CC[C@@H](NC(=O)[C@@H](NC(=O)N(Cc1nc(sc1)C(C)C)C)CCN)Cc1ccccc1	8e-07	3.15	6.09691	2.94691	8.61848	49	0.175887
CHEMBL358880	O(CCCC)c1ccc(-n2cncc2C)cc1	1.2e-07	3.98	6.92082	2.94082	9.78314	17	0.575479
CHEMBL549296	Fc1cc(F)c(F)cc1C[C@@H](N)CC(=O)N1CCC[C@H]1CNc1nc(ccn1)C(F)(F)F	4e-07	3.46	6.39794	2.93794	9.04401	32	0.282625
CHEMBL558452	S(=O)(=O)(N(C[C@H]1N(CCC1)C(=O)C[C@H](N)Cc1cc(F)c(F)cc1F)C)C(F)(F)F	1.3e-06	2.95	5.88606	2.93606	8.32042	30	0.277347
CHEMBL1077991	S(=O)(=O)(Cc1cc2CCNCCc2cc1)c1ccc(cc1)-c1cc(F)c(F)cc1	1e-07	4.07	7	2.93	9.89507	29	0.341209
CHEMBL511401	o1nc(nc1-c1n(nc2c1cccc2)CCc1ccccc1)CN	4.27e-06	2.44	5.36957	2.92957	7.59033	24	0.316264
CHEMBL3128178	s1c2c(nc1)[C@@H](CC2)C(=O)Nc1ccc(cc1)C[C@H]1N[C@H](CC1)[C@H](O)c1cccnc1	7.88e-05	1.18	4.10347	2.92347	5.80059	31	0.187116
CHEMBL1078268	S(=O)(=O)(Cc1cc2CCNCCc2cc1)c1ccc(nc1)-c1ccc(F)cc1	6e-07	3.3	6.22185	2.92185	8.79509	28	0.31411
CHEMBL598644	Clc1cc(ccc1Cl)C1([C@H]2[C@@H]1CNC2)COCC1CC1	1e-06	3.08	6	2.92	8.48149	20	0.424074
CHEMBL610795	Clc1cc(ccc1Cl)[C@]12[C@H](CNC1)[C@H]2COCC1CC1	1e-06	3.08	6	2.92	8.48149	20	0.424074
CHEMBL1669426	n1ccncc1CN(CCC=1Cc2c(cccc2)C=1[C@@H](C)c1nccnc1)C	1e-05	2.08	5	2.92	7.06791	28	0.252425
CHEMBL1088900	O(C)c1nccnc1CC=1c2c(CC=1CCN(C)C)cccc2	9e-07	3.13	6.04576	2.91576	8.54617	23	0.371573
CHEMBL2335736	FC(F)(F)Oc1ccc(cc1)[C@@]1(O)CCN2[C@H](C1)c1cc(O)c(OC)cc1CC2	8.4e-07	3.16	6.07572	2.91572	8.58853	29	0.296156
CHEMBL337301	O(C)c1c2c([nH]cc2C(=O)C(=O)N2CCN(C[C@H]2C)C(=O)c2ccccc2)ncc1	9.7e-06	2.11	5.01323	2.90323	7.08661	30	0.23622
CHEMBL435132	O[C@H]1CCN(C1)C[C@@H](N(C(=O)CNc1ccc(cc1)C#N)C)c1ccccc1	2.5e-06	2.7	5.60206	2.90206	7.91897	28	0.28282
CHEMBL3091529	Fc1ccc(cc1)[C@@H]1OCCN(C1)C1=NC(=CC(=O)N1C)c1ccncc1	4.42e-05	1.46	4.35458	2.89458	6.15555	27	0.227983
CHEMBL559477	Fc1cc(F)c(F)cc1[C@H]1Cc2n(C[C@@H]1N)c1cc(F)ncc1n2.FC(F)(F)C(O)=O.FC(F)(F)C(O)=O	1.2e-05	2.03	4.92082	2.89082	6.95598	38	0.183052
CHEMBL455475	O1CC(N=C1c1ccc(cc1)Cc1nc[nH]c1)(C)C	5.43e-07	3.38	6.2652	2.8852	8.85637	19	0.466125
CHEMBL113227	O(CCCc1ccncc1)c1ccc(-n2ccnc2)cc1	1.04e-06	3.1	5.98297	2.88297	8.45741	21	0.402734
CHEMBL381070	O=C(N1CCC(CC1)Cc1nc[nH]c1)CCc1ccc(cc1)CN1CCCCC1	3e-06	2.64	5.52288	2.88288	7.80704	29	0.269208
CHEMBL151974	O(CCCC)c1ccc(cc1)-c1ncncc1	5e-07	3.42	6.30103	2.88103	8.90702	17	0.523942
CHEMBL440230	Clc1c(cccc1Cl)CN(Cc1ncccc1)[C@@H]1CCNC1	5e-07	3.42	6.30103	2.88103	8.90702	22	0.404864
CHEMBL403742	s1c(C(=O)C)c(nc1NC(=O)N[C@@H]1CCN(C[C@H]1CN1C[C@@H](CCC1)Cc1ccc(F)cc1)C(=O)C1CCOCC1)C	1.2e-06	3.04	5.92082	2.88082	8.36956	42	0.199275
CHEMBL556539	S(CC)c1ccccc1C(=O)N(CC1CCC1)[C@H]1CCNC1	4.8e-07	3.44	6.31876	2.87876	8.93208	22	0.406004
CHEMBL476312	S(=O)(=O)(N(Cc1ccccc1-c1ccccc1)[C@H]1CCNC1)C	3.1e-06	2.63	5.50864	2.87864	7.78691	23	0.338561
CHEMBL505433	O1Cc2c(cccc2)[C@H](Oc2ccccc2C)[C@@H]1CNC	8e-07	3.22	6.09691	2.87691	8.61848	21	0.410404
CHEMBL526669	O1Cc2c(cccc2)[C@H](Oc2ccccc2C)[C@H]1CNC	8e-07	3.22	6.09691	2.87691	8.61848	21	0.410404
CHEMBL1669422	[nH]1ccnc1CN(CCC=1Cc2c(cccc2)C=1[C@@H](C)c1nccnc1)C	5.852e-06	2.36	5.2327	2.8727	7.39684	27	0.273957
CHEMBL1092662	Fc1cc2CC(CCN(C)C)=C(c2cc1)Cc1nnccc1	1.2e-05	2.05	4.92082	2.87082	6.95598	22	0.316181
CHEMBL220407	O=C(NC1CCN(CC1)C(=O)N1CCN(CC1)C(C)C)C1CCCC1	1.7e-05	1.9	4.76955	2.86955	6.74215	25	0.269686
CHEMBL1669423	n1ccn(C)c1CN(CCC=1Cc2c(cccc2)C=1[C@@H](C)c1nccnc1)C	5.684e-06	2.38	5.24535	2.86535	7.41472	28	0.264812
CHEMBL551414	O1c2c(cccc2)C(=CC12CCNCC2)c1ccc(cc1)C(=O)N1CCOCC1	7.6e-06	2.26	5.11919	2.85919	7.23639	29	0.249531
CHEMBL399893	s1c(C(=O)C)c(nc1NC(=O)N[C@@H]1CN(CC[C@H]1CN1C[C@@H](CCC1)Cc1ccc(F)cc1)C1CCN(CC1)C(=O)C)C	1.1e-06	3.1	5.95861	2.85861	8.42298	43	0.195883
CHEMBL1170396	O1CCC(CC1)CC1N(CCNC1)c1cc2c([nH]nc2)cc1	8.26e-06	2.23	5.08302	2.85302	7.18526	22	0.326603
CHEMBL186039	Clc1ccc(cc1)C1(O)N(CCN)C(=O)c2c1cccc2	8.5e-06	2.22	5.07058	2.85058	7.16768	21	0.341318
CHEMBL231396	Fc1cc(F)c(F)cc1[C@H]1CCN(C[C@@H]1N)C1=NN2C(=NC(=O)C=C2)C=C1.FC(F)(F)C(O)=O	5.54e-05	1.41	4.25649	2.84649	6.0169	34	0.176968
CHEMBL371018	S(=O)(=O)(NCc1cc2C[C@@H](Oc2cc1)C(=O)N([C@H](CN1C[C@@H](O)CC1)c1ccccc1)C)CCC	5e-06	2.46	5.30103	2.84103	7.49344	35	0.214098
CHEMBL1760322	Fc1c(cc(O[C@H](CCCCNCc2ccc(F)cc2)C(=O)NO)cc1C)C	2.3e-07	3.8	6.63827	2.83827	9.38374	28	0.335133
CHEMBL549584	O(c1ccccc1C(=O)N(CC1CCC1)[C@H]1CCNC1)c1ccccc1	6.5e-08	4.35	7.18709	2.83709	10.1595	26	0.390751
CHEMBL401406	Clc1cc(ccc1O)C(O)C(N1CCC(O)(CC1)c1ccc(F)cc1)C	3.5e-06	2.62	5.45593	2.83593	7.7124	26	0.296631
CHEMBL419396	S1C2SC=CC2C=C1CN1C[C@H](N(CC1)C[C@@H](O)C[C@@H](Cc1cccnc1)C(=O)N[C@H]1c2c(OC[C@H]1O)cccc2)C(=O)NCC(F)(F)F	1.11e-05	2.12	4.95468	2.83468	7.00384	49	0.142935
CHEMBL178100	O(CC(O)CNC(Cc1c2c([nH]c1)cccc2)(C)C)c1c2c(ccc1C#N)cccc2	5e-08	4.47	7.30103	2.83103	10.3206	31	0.332923
CHEMBL113275	O(CCCCCCN(C)C)c1ccc(-n2ccnc2)cc1	4.1e-07	3.56	6.38722	2.82722	9.02885	21	0.429945
CHEMBL599480	Fc1ccc(cc1C(F)(F)F)CN(C(=O)c1ncn(c1)C)C1C[C@@H]2[C@H](C1)CN(C2)CC	1.8e-06	2.92	5.74473	2.82473	8.12064	31	0.261956
CHEMBL382449	O[C@H]1CCN(C1)C[C@@H](N(C(=O)CNc1cc(ccc1)C#N)C)c1ccccc1	3e-06	2.7	5.52288	2.82288	7.80704	28	0.278823
CHEMBL498904	Fc1cccc(C)c1O[C@H]1c2c(C[C@@]1(O)CNC)cccc2	1e-06	3.18	6	2.82	8.48149	22	0.385522
CHEMBL2048846	s1cc(nc1N(C(=O)CSc1nnc(cc1)-c1ccccc1)C)C	2.4e-05	1.8	4.61979	2.81979	6.53045	24	0.272102
CHEMBL497512	Fc1cccc(C(F)(F)F)c1O[C@H]1c2c(CO[C@H]1CNC)cccc2	2.2e-07	3.84	6.65758	2.81758	9.41103	25	0.376441
CHEMBL201884	O[C@H]1CCN(C1)C[C@@H](N(C(=O)CNc1ccccc1)C)c1ccccc1	4.1e-06	2.57	5.38722	2.81722	7.61527	26	0.292895
CHEMBL1080047	S(=O)(=O)(Nc1cc2CCN(CCc2cc1)Cc1n[nH]cc1)C(C)C	1.6e-05	1.98	4.79588	2.81588	6.77937	24	0.282474
CHEMBL1088899	n1cc(ncc1CC=1c2c(CC=1CCN(C)C)cccc2)C	3.2e-06	2.68	5.49485	2.81485	7.76742	22	0.353064
CHEMBL179332	O(CC(O)CNC(Cc1c2c([nH]c1)cccc2)(C)C)c1c2c(ccc1)cccc2	3e-08	4.71	7.52288	2.81288	10.6342	29	0.366697
CHEMBL1170397	O1CCC(CC1)C[C@@H]1N(CCNC1)c1cc2c([nH]nc2)cc1	9.1e-06	2.23	5.04096	2.81096	7.12581	22	0.3239
CHEMBL1222938	O=C1N(c2c(N1Cc1ccccc1)cccc2)C1CCN(CC1)C(=O)C1CCN(CC1)Cc1ccncc1	9.1e-06	2.23	5.04096	2.81096	7.12581	38	0.187521
CHEMBL549992	Fc1cc(F)c(F)cc1C[C@@H](N)CC(=O)N1CCC[C@H]1COCC1CC1	1.7e-06	2.96	5.76955	2.80955	8.15573	26	0.313682
CHEMBL247733	O1CCC(N(Cc2cccc(C)c2C)[C@H]2CCNC2)CC1	5.9e-06	2.42	5.22915	2.80915	7.39183	21	0.351992
CHEMBL1642896	Clc1cc(ccc1Cl)[C@@H]1C[C@H](NC)Cc2c1cccc2	2e-08	4.89	7.69897	2.80897	10.8831	20	0.544156
CHEMBL463387	O=C(N(C)C)c1[nH]c2c(cc(cc2)C2(CCNC2)Cc2ccccc2)c1	2.9e-06	2.73	5.5376	2.8076	7.82785	26	0.301071
CHEMBL448375	Clc1ccccc1O[C@H]1c2c(CO[C@H]1CNC)cccc2	7e-07	3.35	6.1549	2.8049	8.70045	21	0.414307
CHEMBL563849	Fc1cc(F)c(F)cc1C[C@@H](N)CC(=O)N1CCC[C@H]1COc1ncc(cc1)C#N	1.8e-06	2.94	5.74473	2.80473	8.12064	30	0.270688
CHEMBL1911538	O(CCC(O)(C)C)c1cc(OCC=2Nc3c(cccc3)C(=O)C=2C)ncc1	1.4e-05	2.05	4.85387	2.80387	6.86134	27	0.254124
CHEMBL1669412	n1ccncc1CC=1c2c(CC=1CCN1CCC1)cccc2	8.845e-06	2.25	5.0533	2.8033	7.14325	22	0.324693
CHEMBL536086	Cl.s1cc(cc1)-c1ncnc(N2CC(c3cc(F)c(F)cc3F)C(N)C2)c1	1.1e-06	3.16	5.95861	2.79861	8.42298	27	0.311962
CHEMBL382677	O(CCCN1CCC(CC1)Cc1nc[nH]c1)c1ccc(cc1)-c1cccnc1	3e-07	3.73	6.52288	2.79288	9.22062	28	0.329308
CHEMBL84440	O=[N+]([O-])c1cc(ccc1NCCN)-c1c(nc(nc1N)N)CC	3e-05	1.73	4.52288	2.79288	6.39346	23	0.277976
CHEMBL203567	Fc1ccc(-n2ncc(C(=O)c3cc(OC[C@@H](O)CO)ccc3)c2N)cc1	2.5e-05	1.81	4.60206	2.79206	6.50539	27	0.24094
CHEMBL370538	s1cccc1CS(=O)(=O)NCc1ccc(cc1)CC(=O)N([C@H](CN1C[C@@H](O)CC1)c1ccccc1)C	4.776e-06	2.53	5.32094	2.79094	7.52158	36	0.208933
CHEMBL511602	S(=O)(=O)(n1nc(c2c1cccc2)-c1onc(n1)CNC(OC(C)(C)C)=O)c1cc(OC)c(OC)cc1	2e-05	1.91	4.69897	2.78897	6.64238	36	0.18451
CHEMBL262968	O(CCCc1cccnc1)c1ccc(-n2ccnc2)cc1	1.3e-06	3.1	5.88606	2.78606	8.32042	21	0.39621
CHEMBL371467	S(=O)(=O)(NCc1cc2C[C@@H](Oc2cc1)C(=O)N([C@H](CN1C[C@@H](O)CC1)c1ccccc1)C)CCC	5.7e-06	2.46	5.24413	2.78413	7.413	35	0.2118
CHEMBL1669406	n1ccncc1CC=1c2c(CC=1CCN(CCC)C)cccc2	9.73e-07	3.24	6.01189	2.77189	8.49829	23	0.369491
CHEMBL1085810	S(=O)(=O)(c1ccccc1CO)c1ccc(cc1)\C=C\c1ccc(F)cc1	1e-07	4.23	7	2.77	9.89507	26	0.38058
CHEMBL608151	Clc1cc(ccc1Cl)[C@@]12[C@@H](CNC1)[C@@H]2COCC	4e-06	2.63	5.39794	2.76794	7.63043	18	0.423913
CHEMBL129134	Oc1ccc(cc1)\C=C\C(=O)\C=C\c1ccc(O)cc1	2e-06	2.94	5.69897	2.75897	8.05596	20	0.402798
CHEMBL2012838	Fc1ccc(cc1)C(NCCCC[C@@H](C[C@@H](OC)c1ccc(F)cc1)C(=O)NO)CC	1.6e-07	4.04	6.79588	2.75588	9.60653	31	0.309888
CHEMBL1669408	FCCN(CCC=1Cc2c(cccc2)C=1[C@@H](C)c1nccnc1)C	2.605e-06	2.83	5.58419	2.75419	7.89371	24	0.328905
CHEMBL460499	FC1=CN(C(=O)NCCCCCC)C(=O)NC1=O	5e-06	2.55	5.30103	2.75103	7.49344	18	0.416302
CHEMBL598659	FC(F)(F)Oc1cc(ccc1)CN(C(=O)c1ncn(c1)C)C1C[C@@H]2[C@H](C1)CN(C2)C	7.1e-06	2.4	5.14874	2.74874	7.27817	30	0.242606
CHEMBL550472	s1c(ccc1C(=O)N(CC)CC)C1=CC2(Oc3c1cccc3)CCNCC2	2.1e-06	2.93	5.67778	2.74778	8.026	27	0.297259
CHEMBL443098	O(C)c1ccccc1Cc1[nH]c2cc(ccc2n1)-c1nn(c2ncnc(N)c12)C1CCC(N2CCN(CC2)CCCOC)CC1	1.6e-06	3.05	5.79588	2.74588	8.19295	45	0.182066
CHEMBL201905	FC(F)(F)c1ccc(NCC(=O)N([C@H](CN2C[C@@H](O)CC2)c2ccccc2)C)cc1	1.9e-07	3.98	6.72125	2.74125	9.50103	30	0.316701
CHEMBL367605	O(CC(O)CN(C(Cc1[nH]c2c(c1)cccc2)(C)C)CC=C)c1ccccc1C#N	4e-08	4.66	7.39794	2.73794	10.4576	30	0.348586
CHEMBL2170631	FC(F)(F)c1cc(ccc1C1CCN(CC1)C(=O)c1ccccc1C#N)C(=O)NC(N)=N	1e-05	2.27	5	2.73	7.06791	32	0.220872
CHEMBL1078464	S(=O)(=O)(Cc1cc2CCNCCc2cc1)c1ccc(nc1)Nc1ccc(F)cc1	3e-07	3.8	6.52288	2.72288	9.22062	29	0.317952
CHEMBL1935426	S1(=O)(=O)CCC(CC1)COc1cc2CCC3(Oc2cc1)CCN(CC3)C1CCC1	1.1e-05	2.24	4.95861	2.71861	7.0094	29	0.241703
CHEMBL1078345	S(=O)(=O)(Cc1cc2CCNCCc2cc1)c1ccc(cc1)-c1ccc(F)cc1	2e-07	3.99	6.69897	2.70897	9.46954	28	0.338198
CHEMBL10	S(=O)(C)c1ccc(cc1)-c1[nH]c(c(n1)-c1ccc(F)cc1)-c1ccncc1	2e-06	2.99	5.69897	2.70897	8.05596	27	0.298369
CHEMBL1200396	Cl.O=C(Nc1c(cccc1C)C)C1N(CCCC1)CCCC	4e-07	3.69	6.39794	2.70794	9.04401	22	0.411091
CHEMBL1762473	Clc1cc(O[C@@H](CCN)c2ccccc2)c(cc1)C#N.OC(=O)C(O)=O	4e-07	3.69	6.39794	2.70794	9.04401	26	0.347847
CHEMBL454674	Fc1ccccc1O[C@H]1c2c(C[C@@]1(O)CNC)cccc2	4e-06	2.69	5.39794	2.70794	7.63043	21	0.363354
CHEMBL1224402	Fc1cc(cc2c1[nH]cc2)C(=O)C1(CCNC1)CCC	8e-07	3.39	6.09691	2.70691	8.61848	20	0.430924
CHEMBL556708	Fc1cc(F)c(F)cc1C[C@@H](N)CC(=O)N1CCC[C@H]1CNc1ncc(F)cc1	8e-07	3.39	6.09691	2.70691	8.61848	29	0.297189
CHEMBL605540	FC(CN1C[C@H]2[C@H](CC(N(C(=O)c3ncn(c3)C)Cc3cc(OC(F)(F)F)ccc3)C2)C1)C	1.3e-06	3.18	5.88606	2.70606	8.32042	33	0.252134
CHEMBL450668	Fc1c2NC(=O)N(Cc2ccc1)C1CCN(CC1)C(=O)N[C@@H](Cc1cc(c2[nH]ncc2c1)C)C(=O)N1CCC(N2CCCCC2)CC1	1.6e-06	3.09	5.79588	2.70588	8.19295	47	0.174318
CHEMBL2347409	O=C(NC1(CCNC1)C)c1c2nc(cnc2[nH]c1)-c1nn(c2c1ccc(c2)C)C	3e-06	2.82	5.52288	2.70288	7.80704	29	0.269208
CHEMBL583867	O=C(C(=O)N1CCN(C[C@H]1C)C(=O)c1ccccc1)c1c2c([nH]c1)cncc2	3.8e-05	1.72	4.42022	2.70022	6.24834	28	0.223155
CHEMBL2338036	Clc1cc(OC)c(O[C@H]([C@H]2CCNC2)c2ccccc2)cc1	3.1623e-07	3.8	6.5	2.7	9.18827	22	0.417649
CHEMBL1760318	Fc1ccc(cc1)CNCCCC[C@@H](C[C@@H](OC)c1ccc(F)cc1)C(=O)NO	1.26e-06	3.2	5.89963	2.69963	8.33961	29	0.287573
CHEMBL251446	s1c(C(=O)C)c(nc1NC(=O)N[C@@H]1CCN(C[C@H]1CN1C[C@@H](CCC1)Cc1ccc(F)cc1)C(=O)NCC)C	1.7e-07	4.07	6.76955	2.69955	9.56931	39	0.245367
CHEMBL1172524	[nH]1ncc2cc(N3CCNC[C@H]3CCC)ccc12	1.9e-06	3.03	5.72125	2.69125	8.08745	18	0.449303
CHEMBL2347406	OCc1c2[nH]nc(c2ccc1)-c1nc2c([nH]cc2C(=O)NC(C)(C)C)nc1	1.2e-05	2.23	4.92082	2.69082	6.95598	27	0.257629
CHEMBL1911541	O1CCC(CC1)COc1nc(OCC=2Nc3c(cccc3)C(=O)C=2C)ccc1	7e-06	2.47	5.1549	2.6849	7.28687	28	0.260245
CHEMBL509446	O([C@H]1c2c(C[C@@]1(O)CN)cccc2)c1ccccc1C	3.3e-06	2.8	5.48149	2.68149	7.74853	20	0.387426
CHEMBL1090186	O(C)c1nccnc1[C@@H](C)C=1c2c(CC=1CCN(C)C)cc(OC)cc2	1.9e-06	3.04	5.72125	2.68125	8.08745	26	0.311056
CHEMBL3087352	Clc1cc(S(=O)(=O)Nc2ccc(-n3ccnc3)cc2)cc(Cl)c1	1e-07	4.32	7	2.68	9.89507	23	0.43022
CHEMBL1270139	O=C(NO)c1cnc(nc1)N1C[C@@H]2[C@H](C1)CN(C2)Cc1cc2c(cc1)cccc2	1e-05	2.32	5	2.68	7.06791	29	0.243721
CHEMBL258322	Fc1ccc(cc1)C[C@@H]1CCCN(C1)[C@H](N)C[C@H](NC(=O)Nc1cc(ccc1)-c1nnnn1C)C	4e-07	3.72	6.39794	2.67794	9.04401	35	0.2584
CHEMBL451620	OC1(Cc2c(cccc2)C1Cc1ccccc1C)CNC	9e-07	3.37	6.04576	2.67576	8.54617	21	0.40696
CHEMBL480	S(=O)(Cc1nccc(OCC(F)(F)F)c1C)c1[nH]c2c(n1)cccc2	5.3148e-06	2.6	5.27451	2.67451	7.45595	25	0.298238
CHEMBL551615	O1c2c(cccc2)C(=CC12CCNCC2)c1cc2c(cc1)C(=O)N(CC2)CC	2.8e-06	2.88	5.55284	2.67284	7.84939	28	0.280336
CHEMBL459176	n1(c2c(cc(cc2)C2(CCNC2)Cc2ccccc2)cc1)C	1e-07	4.33	7	2.67	9.89507	22	0.449776
CHEMBL276140	S(C)c1cc2CCN(c2cc1C(F)(F)F)C(=O)Nc1cccnc1	1.1e-07	4.29	6.95861	2.66861	9.83656	24	0.409857
CHEMBL2397305	s1c(-c2ccc(nc2)N)c(nc1NC(=O)CN(C(=O)c1ccncc1)Cc1ccccc1)C	4.3e-06	2.7	5.36653	2.66653	7.58603	33	0.22988
CHEMBL487355	[nH]1c2c(cc(cc2)C2(CCNC2)Cc2ccccc2)cc1	3e-07	3.86	6.52288	2.66288	9.22062	21	0.439077
CHEMBL556449	Fc1ccc(cc1)Cn1c2c(nc1N1CCC(n3ccnc3)CC1)cccc2	1.117e-06	3.29	5.95195	2.66195	8.41356	28	0.300484
CHEMBL1935447	S1CCNC[C@@H]1c1nc2c(n1Cc1ccc(OC)cc1)cccc2	3.3e-06	2.82	5.48149	2.66149	7.74853	24	0.322855
CHEMBL1669413	n1ccncc1CC=1c2c(CC=1CCN1CCCC1)cccc2	3.385e-06	2.81	5.47044	2.66044	7.73291	23	0.336214
CHEMBL3216770	Cl.Cl.s1cccc1C(Nc1cc2CCC(=O)N(c2cc1)CCN(C)C)=N	1.22e-05	2.26	4.91364	2.65364	6.94583	26	0.267147
CHEMBL1907089	Fc1cc(ccc1F)C(=O)NCCN1CCC2(N(CNC2=O)c2cc(F)ccc2)CC1	7.9e-06	2.45	5.10237	2.65237	7.21262	31	0.232665
CHEMBL1669405	n1ccncc1CC=1c2c(CC=1CCN(CC)C)cccc2	4.346e-06	2.71	5.36191	2.65191	7.5795	22	0.344523
CHEMBL3115191	s1cncc1COC(=O)N[C@@H](Cc1ccccc1)CC[C@@H](NC(=O)[C@@H](NC(=O)N(Cc1nc(sc1)C(C)C)C)Cc1nc[nH]c1)Cc1ccccc1	4e-07	3.75	6.39794	2.64794	9.04401	52	0.173923
CHEMBL478622	S(=O)(=O)(N(Cc1ccccc1-c1ccccc1)[C@@H]1CCNC1)C	5.36e-06	2.63	5.27084	2.64084	7.45075	23	0.323946
CHEMBL1669414	FC1CN(C1)CCC=1Cc2c(cccc2)C=1Cc1nccnc1	6.466e-06	2.55	5.18936	2.63936	7.33559	23	0.318939
CHEMBL2178718	s1cc(cc1[C@@]12NC(=N)N(C)C(=O)[C@@H]1CN(C2)c1ncc(F)cn1)-c1cc(ccc1)C#N	1.97e-05	2.07	4.70553	2.63553	6.65166	32	0.207864
CHEMBL179529	s1c(ccc1NC)-c1cccnc1	1.44e-05	2.21	4.84164	2.63164	6.84405	13	0.526465
CHEMBL251275	s1c(C(=O)C)c(nc1NC(=O)N[C@@H]1CCN(C[C@H]1CN1C[C@@H](CCC1)Cc1ccc(F)cc1)C(=O)COC)C	1.2e-06	3.29	5.92082	2.63082	8.36956	39	0.214604
CHEMBL556439	O1c2c(cccc2)C(=CC12CCNC2)c1ccc(cc1)C(=O)N(CC)CC	2.4e-06	2.99	5.61979	2.62979	7.94403	27	0.294223
CHEMBL400589	s1c(C(=O)C)c(nc1NC(=O)N[C@@H]1CCN(C[C@H]1CN1C[C@@H](CCC1)Cc1ccc(F)cc1)C(=O)NC)C	5.5e-07	3.63	6.25964	2.62964	8.84851	38	0.232855
CHEMBL112532	O(CCCC)c1ccc(-n2ccnc2)cc1	4.6e-07	3.71	6.33724	2.62724	8.95821	16	0.559888
CHEMBL444742	Fc1cccc(O[C@H]2c3c(CO[C@H]2CNC)cccc3)c1C	7.4e-07	3.51	6.13077	2.62077	8.66634	22	0.393925
CHEMBL463388	[nH]1c2c(cc(cc2)C2(CCNC2)C)cc1	8.7e-06	2.44	5.06048	2.62048	7.1534	15	0.476893
CHEMBL516507	Fc1cc(O[C@H]2c3c(C[C@@]2(O)CNC)cccc3)c(cc1)C	1e-06	3.38	6	2.62	8.48149	22	0.385522
CHEMBL1762479	Clc1cc(O[C@@H](CCN)c2ccccc2)c(cc1F)C#N.OC(=O)C(O)=O	3.4e-07	3.85	6.46852	2.61852	9.14378	27	0.338659
CHEMBL204705	O(CCCN1CCC(CC1)Cc1nc[nH]c1)c1ccc(cc1)CN1CCCCC1=O	5e-06	2.69	5.30103	2.61103	7.49344	30	0.249781
CHEMBL204639	O(CCCN1CCC(CC1)Cc1nc[nH]c1)c1ccc(cc1)-c1cncnc1	4e-06	2.79	5.39794	2.60794	7.63043	28	0.272515
CHEMBL1672966	O([C@@H](C)c1ccccc1CCC(O)=O)C[C@H](O)CNC(Cc1cc2c(cc1)cccc2)(C)C	9.6e-06	2.41	5.01773	2.60773	7.09297	33	0.214938
CHEMBL395408	O1CCC(N(Cc2cccc(C)c2C)[C@@H]2CCNC2)CC1	9.4e-06	2.42	5.02687	2.60687	7.10589	21	0.338376
CHEMBL197070	O1c2c(cc(cc2)CNC(OC)=O)CC[C@@H]1C(=O)N([C@H](CN1C[C@@H](O)CC1)c1ccccc1)C	4.2e-06	2.77	5.37675	2.60675	7.60047	34	0.223543
CHEMBL3094125	S(=O)(=O)(N1CCC(Oc2cc3CCN(CCc3cc2)C2CCC2)CC1)C	1.3e-05	2.28	4.88606	2.60606	6.90684	26	0.265648
CHEMBL202267	S(=O)(=O)(Nc1ccc(NCC(=O)N([C@H](CN2C[C@@H](O)CC2)c2ccccc2)C)cc1)CCC	9e-06	2.44	5.04576	2.60576	7.13259	33	0.216139
CHEMBL466917	o1nc(nc1-c1nn(c2c1cccc2)Cc1cc(ccc1)C)CN	3.96e-06	2.8	5.4023	2.6023	7.6366	24	0.318192
CHEMBL1224382	Clc1cc(ccc1Cl)[C@@H](n1nc(nn1)C)CCNC	6.9e-06	2.56	5.16115	2.60115	7.29571	19	0.383985
CHEMBL507359	O([C@H]1c2c(C[C@@]1(O)CNC)cccc2)c1ccccc1C	2e-06	3.1	5.69897	2.59897	8.05596	21	0.383617
CHEMBL509373	O(C1c2c(CC1(O)CN)cccc2)c1ccccc1C	4e-06	2.8	5.39794	2.59794	7.63043	20	0.381521
CHEMBL564922	O1c2c(cccc2)C(=CC12CCNCC2)c1ccc(cc1)C(=O)N1CCCC1	4.7e-06	2.73	5.3279	2.5979	7.53142	28	0.268979
CHEMBL1642915	Clc1cc(ccc1Cl)[C@H]1c2c(CC[C@H]1NC)cccc2	3.3e-08	4.89	7.48149	2.59149	10.5757	20	0.528784
CHEMBL259209	O=C(N(CC)CC)C1(CC1CN)c1ccccc1	3.16228e-05	1.91	4.5	2.59	6.36112	18	0.353395
CHEMBL567570	O=C(C(=O)N1CCN(C[C@H]1C)C(=O)c1ccccc1)c1c2c([nH]c1)cccc2	4.8e-06	2.73	5.31876	2.58876	7.5185	28	0.268518
CHEMBL2205775	O(C(=O)C(C(n1ncnc1)c1ccc(Nc2ccccc2)cc1)(C)C)C	1.3e-06	3.3	5.88606	2.58606	8.32042	26	0.320016
CHEMBL498509	O1C[C@@H](CN)[C@@H](Oc2ccccc2C)c2c1cccc2	1.6e-06	3.21	5.79588	2.58588	8.19295	20	0.409647
CHEMBL526270	FC(F)(F)c1ccccc1O[C@H]1c2c(CO[C@H]1CNC)cccc2	3.7e-07	3.85	6.4318	2.5818	9.09187	24	0.378828
CHEMBL180767	O(CC(O)CNC(C)(C)C)c1ccccc1	2.8e-05	1.98	4.55284	2.57284	6.43581	16	0.402238
CHEMBL1911535	O1CCC(CC1)COc1cc(OCC=2Nc3c(cc(cc3)-c3cccnc3)C(=O)C=2C)ccc1	1.9e-06	3.15	5.72125	2.57125	8.08745	34	0.237866
CHEMBL85	Fc1cc2onc(c2cc1)C1CCN(CC1)CCC=1C(=O)N2C(=NC=1C)CCCC2	5.2734e-06	2.71	5.27791	2.56791	7.46075	30	0.248692
CHEMBL1669417	FC1CCN(C1)CCC=1Cc2c(cccc2)C=1Cc1nccnc1	4.293e-06	2.8	5.36724	2.56724	7.58703	24	0.316126
CHEMBL397474	O[C@H]1CCN(C1)C[C@@H](N(C(=O)CCC(=O)Nc1ccccc1)C)c1ccccc1	8.6e-06	2.5	5.0655	2.5655	7.1605	29	0.246914
CHEMBL515936	S(=O)(=O)(N(Cc1ccccc1-c1ccccc1)[C@H]1CCNC1)CC	1.89e-06	3.16	5.72354	2.56354	8.09069	24	0.337112
CHEMBL255399	Fc1ccc(cc1)C[C@@H]1CCCN(C1)[C@H](O)C[C@H](NC(=O)Nc1cc(cc(c1)-c1occn1)-c1occn1)C	5e-07	3.74	6.30103	2.56103	8.90702	39	0.228385
CHEMBL3084581	Fc1cc2c(cc(cc2)CN2[C@H]3CC(NC(=O)c4cc[n+]([O-])cc4C(=O)N4CCCCC4)C[C@@H]2CC3)cc1	2.9e-05	1.98	4.5376	2.5576	6.41427	38	0.168797
CHEMBL562897	Fc1cc2c(cc(cc2)CN2C3CC(NC(=O)c4cc[n+]([O-])cc4C(=O)N4CCCCC4)CC2CC3)cc1	2.9e-05	1.98	4.5376	2.5576	6.41427	38	0.168797
CHEMBL38576	Clc1cc(ccc1Cl)CC(=O)N([C@H](CN1CCCC1)c1ccccc1)C	2.6e-08	5.03	7.58503	2.55503	10.7221	26	0.412387
CHEMBL397392	O1CCC(N(Cc2ccccc2C)[C@H]2CCNC2)CC1	3e-05	1.97	4.52288	2.55288	6.39346	20	0.319673
CHEMBL1762480	S([C@H](CCN)c1ccccc1)c1nc(ccc1C#N)C.OC(=O)\C=C\C(O)=O	5e-06	2.75	5.30103	2.55103	7.49344	28	0.267623
CHEMBL355539	O1c2c(ccc(OC)c2)C(=CC1=O)CN(C)C	7.42e-05	1.58	4.1296	2.5496	5.83752	17	0.343384
CHEMBL1223003	O(C)c1ccc(cc1)CN1c2c(N(C3CCN(CC3)C(=O)C3CCN(CC3)Cc3ccncc3)C1=O)cccc2	2e-05	2.15	4.69897	2.54897	6.64238	40	0.166059
CHEMBL1276654	Fc1c2CCC3(Oc2ccc1)CCN(CC3)c1nnc(cc1)-c1oc(nn1)Cc1cccnc1	2.7e-05	2.02	4.56864	2.54864	6.45814	34	0.189945
CHEMBL361365	O(CC(O)CNC(Cc1n(c2c(c1)cccc2)C)(C)C)c1ccccc1C	9e-08	4.5	7.04576	2.54576	9.95975	27	0.36888
CHEMBL1088882	n1c(cncc1C)CC=1c2c(CC=1CCN(C)C)cccc2	6e-06	2.68	5.22185	2.54185	7.38151	22	0.335523
CHEMBL455448	O(C1c2c(CC1(O)CNC)cccc2)c1ccccc1C	2.3e-06	3.1	5.63827	2.53827	7.97016	21	0.379531
CHEMBL475684	Clc1cc(-n2nc(cc2)C)ccc1C(=O)N1CCC(F)(F)/C(/c2c1cccc2)=C/C(=O)NCc1nnccc1	8.9e-06	2.52	5.05061	2.53061	7.13945	39	0.183063
CHEMBL363718	S(=O)(=O)(N1Cc2cc(ccc2C1)CC(=O)N([C@H](CN1CCCC1)c1ccccc1)C)C	1.037e-06	3.46	5.98422	2.52422	8.45918	31	0.272877
CHEMBL203805	O(CCCN1CCC(CC1)Cc1nc[nH]c1)c1ccc(cc1)C(=O)N1CCCCC1	2e-06	3.19	5.69897	2.50897	8.05596	30	0.268532
CHEMBL201572	O[C@H]1CCN(C1)C[C@@H](N(C(=O)CNc1ccc([N+](=O)[O-])cc1)C)c1ccccc1	3.4e-06	2.96	5.46852	2.50852	7.7302	29	0.266559
CHEMBL1092649	Fc1cc2CC(CCN(C)C)=C(c2cc1)Cc1nccnc1	1.5e-05	2.32	4.82391	2.50391	6.81899	22	0.309954
CHEMBL462401	O([C@@H]1c2c(C[C@]1(O)CNC)cccc2)c1ccccc1C	2.5e-06	3.1	5.60206	2.50206	7.91897	21	0.377094
CHEMBL2347999	OCC(NC(=O)c1c2nc(-n3nc(c4c3cccc4)C3CCN(CC3)C)cnc2[nH]c1)(C)C	1.2e-05	2.42	4.92082	2.50082	6.95598	33	0.210787
CHEMBL1092600	n1ccncc1CC=1c2c(CC=1CCN(C)C)cc(cc2)C	6.6e-06	2.68	5.18046	2.50046	7.323	22	0.332863
CHEMBL597033	FC(F)(F)Oc1cc(ccc1)CN(C(=O)c1ncn(c1)C)C1C[C@@H]2[C@H](C1)CN(C2)CC(O)c1ccccc1	1.7e-06	3.27	5.76955	2.49955	8.15573	38	0.214624
CHEMBL900	O(C(c1ccccc1C)c1ccccc1)CCN(C)C	4e-07	3.9	6.39794	2.49794	9.04401	20	0.4522
CHEMBL402708	s1c(C(=O)C)c(nc1NC(=O)N[C@@H]1CN(CC[C@H]1CN1C[C@@H](CCC1)Cc1ccc(F)cc1)C(=O)C1CC1)C	8e-08	4.6	7.09691	2.49691	10.0321	39	0.257232
CHEMBL381198	O1c2c(CC[C@H]1C(=O)N([C@H](CN1C[C@@H](O)CC1)c1ccccc1)C)cccc2	1.6e-06	3.3	5.79588	2.49588	8.19295	28	0.292605
CHEMBL245880	Clc1c(cccc1Cl)CN([C@H]1CCNC1)C1CCOCC1	4.8e-06	2.83	5.31876	2.48876	7.5185	21	0.358024
CHEMBL563244	Fc1cc(F)c(F)cc1C[C@@H](N)CC(=O)N1CCC[C@H]1CNc1ncc(cc1)C#N	4.6e-06	2.85	5.33724	2.48724	7.54463	30	0.251488
CHEMBL486045	O([C@@H]1C[C@@H](NC)Cc2c1cccc2)c1ccccc1C	2.5e-07	4.12	6.60206	2.48206	9.33255	20	0.466627
CHEMBL1090527	s1ccnc1[C@H](C)C=1c2c(CC=1CCN(C)C)cc(F)cc2	1e-06	3.52	6	2.48	8.48149	22	0.385522
CHEMBL1078555	S(=O)(=O)(Cc1cc2CCNCCc2cc1)c1ccc(Oc2ccc(F)cc2)nc1	1.7e-06	3.29	5.76955	2.47955	8.15573	29	0.281232
CHEMBL2178738	Clc1cc2c(n(S(=O)(=O)c3cc(NC4CCN(CC4)C)c(OC)cc3)nc2C)cc1.OC(=O)[C@@H](O)[C@@H](O)C(=O)C	1.45e-05	2.36	4.83863	2.47863	6.8398	40	0.170995
CHEMBL557054	O1c2c(cccc2)C(=CC12CCNCC2)c1ccc(nc1)C(=O)N(CC)CC	3e-05	2.05	4.52288	2.47288	6.39346	28	0.228338
CHEMBL2337594	Clc1cc(O[C@H]([C@H]2CCNC2)c2ccccc2)ccc1	2.5119e-07	4.13	6.6	2.47	9.32963	20	0.466482
CHEMBL446321	Clc1ccccc1O[C@H]1c2c(C[C@@]1(O)CNC)cccc2	2e-06	3.23	5.69897	2.46897	8.05596	21	0.383617
CHEMBL502379	O([C@H]1c2c(C[C@@]1(O)CNC)cccc2)c1ccccc1CC	8e-07	3.63	6.09691	2.46691	8.61848	22	0.391749
CHEMBL358216	o1cncc1-c1ccc(OCCCC)cc1	1.01e-06	3.53	5.99568	2.46568	8.47538	16	0.529711
CHEMBL524798	O1Cc2c(cccc2)[C@H](Oc2ccccc2C)[C@@H]1CN	4e-06	2.94	5.39794	2.45794	7.63043	20	0.381521
CHEMBL1258873	O(C1CCN(CC1)C(C)C)c1cc2c(n3c(c2)C(=O)N(CC3)C)cc1	1.5e-05	2.37	4.82391	2.45391	6.81899	25	0.272759
CHEMBL1224091	Clc1cc(ccc1N)C(=O)C1(NCCC1)COC(C)C	1.4e-05	2.4	4.85387	2.45387	6.86134	20	0.343067
CHEMBL428676	O=C1N(CCN(C)C)C(=O)c2c3c1cc(N)cc3ccc2	3.96e-05	1.95	4.4023	2.4523	6.22302	21	0.296334
CHEMBL3115185	s1cncc1COC(=O)N[C@@H](Cc1ccccc1)CC[C@@H](NC(=O)[C@@H](NC(=O)N(Cc1nc(sc1)C(C)C)C)Cc1ncn(c1)C)Cc1ccccc1	6e-07	3.77	6.22185	2.45185	8.79509	53	0.165945
CHEMBL506137	Fc1cc(C)c(O[C@H]2c3c(C[C@@]2(O)CNC)cccc3)cc1	1.5e-06	3.38	5.82391	2.44391	8.23257	22	0.374208
CHEMBL517423	Fc1cccc(O[C@H]2c3c(C[C@@]2(O)CNC)cccc3)c1C	1.5e-06	3.38	5.82391	2.44391	8.23257	22	0.374208
CHEMBL2332068	O(C)c1cc(ccc1)CN(CCN(C)C)C(=O)Nc1ccc(cc1)-c1cn[nH]c1	3e-06	3.08	5.52288	2.44288	7.80704	29	0.269208
CHEMBL240954	O1c2c(C(=O)C(O[C@@H]3O[C@@H](C)[C@H](OC(=O)C)[C@@H](OC(=O)C)[C@H]3O)=C1c1ccc(O)cc1)c(O)cc(O)c2	5.05e-05	1.86	4.29671	2.43671	6.07375	37	0.164155
CHEMBL249854	s1c(C(=O)C)c(nc1NC(=O)N[C@@H]1CN(CC[C@H]1CN1C[C@@H](CCC1)Cc1ccc(F)cc1)C(=O)C)C	1.3e-06	3.45	5.88606	2.43606	8.32042	37	0.224876
CHEMBL561138	O1c2c(cccc2)C(=CC12CCNCC2)c1ncc(cc1)C(=O)N(CC)CC	3.3e-05	2.05	4.48149	2.43149	6.33495	28	0.226248
CHEMBL1222940	Clc1cc(ccc1)CN1c2c(N(C3CCN(CC3)C(=O)C3CCN(CC3)Cc3ccncc3)C1=O)cccc2	4.2e-06	2.95	5.37675	2.42675	7.60047	39	0.194884
CHEMBL565101	Fc1cc(F)c(F)cc1C[C@@H](N)CC(=O)N1CCC[C@H]1COc1nccc(c1)C#N	4.3e-06	2.94	5.36653	2.42653	7.58603	30	0.252868
CHEMBL1090175	O(C)c1cc2CC(CCN(C)C)=C(c2cc1)[C@@H](C)c1nccnc1	1.2e-05	2.5	4.92082	2.42082	6.95598	24	0.289832
CHEMBL2069803	o1nc(nc1C1CCCCC1)-c1ccncc1	1e-05	2.58	5	2.42	7.06791	17	0.415759
CHEMBL456350	O(C)c1cc(NC(=O)Nc2cc(ccc2)-c2nn(cc2-c2c3cc[nH]c3ncc2)CC)ccc1	1.9953e-07	4.28	6.69999	2.41999	9.47098	34	0.278558
CHEMBL457931	O=C(N)c1[nH]c2c(cc(cc2)C2(CCNC2)Cc2ccccc2)c1	4.1e-06	2.97	5.38722	2.41722	7.61527	24	0.317303
CHEMBL936	OC(CCCN1CCCCC1)(c1ccccc1)c1ccccc1	3.263e-07	4.07	6.48638	2.41638	9.16903	23	0.398653
CHEMBL404213	s1c(C(=O)C)c(nc1NC(=O)N[C@@H]1CCCO[C@H]1CN1C[C@@H](CCC1)Cc1ccc(F)cc1)C	1e-07	4.59	7	2.41	9.89507	34	0.291031
CHEMBL391143	FC(F)(F)c1cccc(CN([C@H]2CCNC2)C2CCOCC2)c1C	5.5e-06	2.86	5.25964	2.39964	7.43493	24	0.309789
CHEMBL212521	O=C(N[C@@H](Cc1ccc(cc1)-c1ccccc1)C#N)[C@@H](N)CC	1.2605e-05	2.5	4.89946	2.39946	6.92578	23	0.301121
CHEMBL558322	Fc1cc(F)c(F)cc1C[C@@H](N)CC(=O)N1CCC[C@H]1CNC(=O)C(C)(C)C	1.16e-05	2.54	4.93554	2.39554	6.97679	28	0.249171
CHEMBL1951914	S(=O)(=O)(C)c1ccc(cc1)CC(=O)N(CC)C1CCN(CC1)CC[C@H](C1CCN(S(=O)(=O)C)CC1)c1cc(F)cc(F)c1	2.3e-05	2.25	4.63827	2.38827	6.55658	43	0.152478
CHEMBL525238	O1C[C@@H](CNC)[C@@H](Oc2ccccc2CC)c2c1cccc2	4e-07	4.01	6.39794	2.38794	9.04401	22	0.411091
CHEMBL558323	Fc1cc(F)c(F)cc1C[C@@H](N)CC(=O)N1CCC[C@H]1CNC(=O)C(F)(C)C	1.96e-05	2.32	4.70774	2.38774	6.65478	28	0.237671
CHEMBL1255834	s1cccc1COc1cc2c([nH]cc2CC(N)C)cc1	2.7743e-06	3.17	5.55685	2.38685	7.85505	20	0.392753
CHEMBL498120	O1Cc2c(cccc2)[C@@H](Oc2cccc(C)c2C)[C@H]1CNC	8.8e-07	3.67	6.05552	2.38552	8.55997	22	0.389089
CHEMBL489493	O=C(CC(C)(C)C)c1cc(ccc1)Cc1nc[nH]c1	1.926e-06	3.33	5.71534	2.38534	8.0791	19	0.425216
CHEMBL3127520	S(=O)(=O)(c1ccc(NC(=O)[C@@H]2C[C@H]2c2cccnc2)cc1)c1ccccc1	7.6e-06	2.74	5.11919	2.37919	7.23639	27	0.268014
CHEMBL249852	s1c(C(=O)C)c(nc1NC(=O)N[C@@H]1CN(CC[C@H]1CN1C[C@@H](CCC1)Cc1ccc(F)cc1)C(OC)=O)C	8e-08	4.72	7.09691	2.37691	10.0321	38	0.264002
CHEMBL1200406	Clc1[nH]c2c(n1)N(C)C(=O)N(C)C2=O.O(C(c1ccccc1)c1ccccc1)CCN(C)C	1.509e-06	3.45	5.82131	2.37131	8.2289	33	0.249361
CHEMBL2347407	OC(C)(C)c1c2[nH]nc(c2ccc1)-c1nc2c([nH]cc2C(=O)NC(C)(C)C)nc1	5e-06	2.93	5.30103	2.37103	7.49344	29	0.258394
CHEMBL1210614	S(CCCN1CC2(C(C2)C1)c1cc(S(F)(F)(F)(F)F)ccc1)c1nnc(n1C)-c1ocnc1C	2e-06	3.33	5.69897	2.36897	8.05596	34	0.23694
CHEMBL114283	O=C1N2C(=Nc3c(cc(N)cc3)C2)c2c1cccc2	4.8e-05	1.95	4.31876	2.36876	6.10492	19	0.321311
CHEMBL1287901	Cl.Fc1cc(Cn2c3c(N=CN(C)C3=O)cc2N2C[C@@](N)(CCC2)C)c(cc1)C	1.43e-05	2.48	4.84466	2.36466	6.84833	29	0.236149
CHEMBL189643	S(=O)(=O)(NCc1ccc(cc1)CC(=O)N([C@H](CN1C[C@@H](O)CC1)c1ccccc1)C)Cc1ccccc1	5.702e-06	2.88	5.24397	2.36397	7.41278	37	0.200345
CHEMBL563137	O1c2c(cccc2)C(=CC12CCNCC2)c1ccc(cc1)C(=O)NCC(C)C	6.7e-07	3.81	6.17393	2.36393	8.72735	28	0.311691
CHEMBL180975	O(CC(O)CNC(Cc1[nH]c2c(c1)cccc2)(C)C)c1ccccc1CC	1.2e-07	4.56	6.92082	2.36082	9.78314	27	0.362339
CHEMBL178125	O(CC(O)[C@@H](NC(C)C)C)c1c2c(ccc1)cccc2	3.8e-06	3.06	5.42022	2.36022	7.66192	20	0.383096
CHEMBL486597	O1c2cc(ccc2OC1)C[C@H]([C@@H](Cc1cc2OCOc2cc1)CO)CO	1.75e-05	2.4	4.75696	2.35696	6.72435	26	0.258629
CHEMBL1642916	Clc1cc(ccc1Cl)[C@@H]1c2c(CC[C@H]1NC)cccc2	5.7e-08	4.89	7.24413	2.35413	10.2402	20	0.512008
CHEMBL1271427	FC(F)(F)c1nc(N[C@@H]2CCN(C2)C(OC2C3CC4(CC2CC(C4)C3)C(=O)N)=O)ccc1	5.9e-06	2.88	5.22915	2.34915	7.39183	32	0.230995
CHEMBL150999	O(CCCC)c1ccc(cc1)-c1[nH]ccn1	9.4e-07	3.68	6.02687	2.34687	8.51947	16	0.532467
CHEMBL2018915	S(Cc1ccccc1)c1[nH]c2c(n1)cc(OC)cc2	1.2e-07	4.58	6.92082	2.34082	9.78314	19	0.514902
CHEMBL1935448	S1CCNCC1c1nc2c(n1Cc1ccc(OC)cc1)cccc2	7e-06	2.82	5.1549	2.3349	7.28687	24	0.30362
CHEMBL1173532	Clc1cc(ccc1Cl)[C@@]12C[C@@]1(CNCC2)COC	3e-06	3.19	5.52288	2.33288	7.80704	18	0.433724
CHEMBL2178714	s1cc(cc1[C@@]12NC(=N)N(C)C(=O)[C@@H]1CN(C2)c1ncc(F)cc1)-c1cc(ccc1)C#N	6e-06	2.89	5.22185	2.33185	7.38151	32	0.230672
CHEMBL362741	S(=O)(=O)(NCc1ccc(cc1)CC(=O)N([C@H](CN1C[C@@H](O)CC1)c1ccccc1)C)CCCC	7.888e-06	2.78	5.10303	2.32303	7.21355	34	0.212163
CHEMBL380748	OC1(c2c(CCc3c1cccc3)ccc1c2cccc1)CCN(C)C	6e-08	4.9	7.22185	2.32185	10.2087	25	0.408347
CHEMBL1092650	Clc1cc2CC(CCN(C)C)=C(c2cc1)Cc1nccnc1OC	6.9e-07	3.84	6.16115	2.32115	8.70929	24	0.362887
CHEMBL1911525	O1CCC(CC1)COc1cc(OCC=2Nc3c(cccc3)C(=O)C=2C)ccc1	8.3e-06	2.76	5.08092	2.32092	7.1823	28	0.256511
CHEMBL2338409	Clc1cc(cc(Cl)c1)C(=O)NCC1CCN(C1)CCNC(=O)NC(C)(C)C	1e-06	3.68	6	2.32	8.48149	27	0.314129
CHEMBL3128194	s1c2c(nc1N)[C@@H](CC2)C(=O)Nc1ccc(cc1)C[C@H]1N[C@H](CC1)[C@H](O)c1ccccc1	1.83e-05	2.42	4.73755	2.31755	6.69691	32	0.209278
CHEMBL445082	O1C[C@@H](CNC)[C@@H](Oc2ccccc2C)c2c1cccc2	1.6e-06	3.48	5.79588	2.31588	8.19295	21	0.39014
CHEMBL562898	s1cc(cc1C(=O)N(CC)CC)C1=CC2(Oc3c1cccc3)CCNCC2	5.7e-06	2.93	5.24413	2.31413	7.413	27	0.274555
CHEMBL497479	Clc1ccccc1O[C@H]1c2c(OC[C@H]1CNC)cccc2	1.2e-06	3.61	5.92082	2.31082	8.36956	21	0.39855
CHEMBL557315	Fc1cc(F)c(F)cc1C[C@@H](N)CC(=O)N1CCC[C@H]1COc1nc(ncc1)C(F)(F)F	1.7e-06	3.46	5.76955	2.30955	8.15573	32	0.254867
CHEMBL272067	Fc1ccc(cc1)C[C@@H]1CCCN(C1)[C@H](O)C[C@H](NC(=O)Nc1cc(-n2nncc2)cc(-n2nncc2)c1)C	9e-07	3.74	6.04576	2.30576	8.54617	39	0.219133
CHEMBL524313	O1Cc2c(cccc2)[C@H](Oc2ccc(O)cc2C)[C@@H]1CNC	9e-06	2.74	5.04576	2.30576	7.13259	22	0.324209
CHEMBL313383	FC(F)(F)CNC(=O)[C@H]1N(CCN(C1)Cc1oc(cc1)-c1ccncc1)C[C@@H](O)C[C@@H](Cc1ccccc1)C(=O)NC1C2C(OC[C@H]1O)C=CC=C2	5.3e-07	3.97	6.27572	2.30572	8.87125	52	0.170601
CHEMBL3126382	S(=O)(=O)(C1CCCC1)c1cc(ccc1)CCCCOCCCCCCNC[C@@H](O)c1cc(CO)c(O)cc1.OC(=O)C	6.4e-06	2.89	5.19382	2.30382	7.34189	42	0.174807
CHEMBL451399	[nH]1cc(nc1)Cc1cc(ccc1)C#CCCC	6.44e-07	3.89	6.19111	2.30111	8.75164	17	0.514803
CHEMBL1092652	Clc1cc2CC(CCN(C)C)=C(c2cc1)Cc1nnccc1	1.2e-05	2.62	4.92082	2.30082	6.95598	22	0.316181
CHEMBL531	S(C[C@@H]1C[C@H]2[C@H](N(C1)CCC)Cc1c3c2cccc3[nH]c1)C	2e-07	4.4	6.69897	2.29897	9.46954	22	0.430434
CHEMBL103320	O\N=C\Nc1ccc(cc1)C	5.2e-05	1.99	4.284	2.294	6.05578	11	0.550525
CHEMBL190600	S(=O)(=O)(NCc1ccc(cc1)CC(=O)N([C@H](CN1C[C@@H](O)CC1)c1ccccc1)C)c1ccccc1	4.337e-06	3.07	5.36281	2.29281	7.58077	36	0.210577
CHEMBL1830424	O=C(NO)\C=C\c1cc2nc(n(c2cc1)CCN(C)C)CCCCCC	3.17e-06	3.21	5.49894	2.28894	7.7732	26	0.298969
CHEMBL2332065	O(C)c1cc(ccc1)CN(CCO)C(=O)Nc1ccc(cc1)-c1cn[nH]c1	4e-05	2.11	4.39794	2.28794	6.21685	27	0.230254
CHEMBL2010824	Fc1c(cc(cc1C)C[C@@H](CCCCNC(CC)c1ccc(F)cc1)C(=O)NO)C	8e-08	4.81	7.09691	2.28691	10.0321	30	0.334402
CHEMBL517305	[nH]1cc(c2cc(ccc12)C1(CCNC1)Cc1ccccc1)C#N	8e-07	3.81	6.09691	2.28691	8.61848	23	0.374716
CHEMBL1223001	Clc1ccc(cc1)CN1c2c(N(C3CCN(CC3)C(=O)C3CCN(CC3)Cc3ccncc3)C1=O)cccc2	5.8e-06	2.95	5.23657	2.28657	7.40232	39	0.189803
CHEMBL1642894	Clc1cc(ccc1Cl)[C@@H]1C[C@@H](NC)Cc2c1cccc2	6.7e-08	4.89	7.17393	2.28393	10.1409	20	0.507046
CHEMBL381386	OC(C=C(c1ccccc1)c1ccccc1)c1nccn1C	1.5e-05	2.54	4.82391	2.28391	6.81899	22	0.309954
CHEMBL296580	S(Cc1ncccc1)c1[nH]c2c(n1)cccc2	8.79e-06	2.78	5.05601	2.27601	7.14708	17	0.420417
CHEMBL360096	O(CC(O)CNC(C)C)c1c2c(cc(OC)cc2)ccc1	8.4e-06	2.8	5.07572	2.27572	7.17494	21	0.341664
CHEMBL550321	Fc1cc(F)c(F)cc1C[C@@H](N)CC(=O)N1CCC[C@H]1CN(C(=O)C(C)(C)C)C	6.3e-06	2.93	5.20066	2.27066	7.35156	29	0.253502
CHEMBL551347	Fc1ccc(cc1)Cn1c2c(nc1N1CCC(n3nccc3)CC1)cccc2	1.48e-06	3.56	5.82974	2.26974	8.24081	28	0.294315
CHEMBL2436983	[nH]1cc(c2cc(cnc12)-c1cnc(nc1)N)-c1cc2c([nH]cc2)cc1	1.32e-05	2.61	4.87943	2.26943	6.89747	25	0.275899
CHEMBL558651	O(c1ccccc1C(=O)N(CC(C)C)[C@H]1CCNC1)c1ccccc1	2.9e-07	4.27	6.5376	2.2676	9.24143	25	0.369657
CHEMBL514560	O(CC)C(=O)N(Cc1ccccc1-c1ccccc1)[C@@H]1CCNC1	3.5e-07	4.19	6.45593	2.26593	9.12599	24	0.380249
CHEMBL151280	O(CCCC)c1ccc(cc1)-c1ccncc1	3.98e-07	4.14	6.40012	2.26012	9.04709	17	0.532182
CHEMBL2338038	O(C)c1cc([N+](=O)[O-])ccc1O[C@H]([C@H]1CCNC1)c1ccccc1	5.01187e-06	3.04	5.3	2.26	7.49198	24	0.312166
CHEMBL1935443	O1CCNCC1c1nc2c(n1Cc1cc(C)c(cc1)C)cccc2	4.9e-06	3.05	5.3098	2.2598	7.50584	24	0.312743
CHEMBL513618	O(C1c2c(CC1(O)CNCC)cccc2)c1ccccc1C	1.3e-06	3.63	5.88606	2.25606	8.32042	22	0.378201
CHEMBL204235	O(CCCN1CCC(CC1)Cc1nc[nH]c1)c1ccc(nc1)CN1CCCCC1	3e-06	3.27	5.52288	2.25288	7.80704	29	0.269208
CHEMBL178780	n1cn(cc1-c1cccnc1)Cc1ccccc1	3.63e-05	2.19	4.44009	2.25009	6.27643	18	0.348691
CHEMBL1234899	s1c(ccc1-n1c2c(nc1C)cc(OC(F)(F)F)cc2)C(=O)NC1CC1	1e-07	4.75	7	2.25	9.89507	26	0.38058
CHEMBL3086078	S(=O)(=O)(Nc1cccc(CC=2C(Oc3c(cc(F)c(OC(=O)N(C)C)c3)C=2C)=O)c1F)N	4.9e-05	2.06	4.3098	2.2498	6.09226	32	0.190383
CHEMBL550471	O1c2c(cccc2)[C@@H](CC12CCNCC2)c1ccc(cc1)C(=O)N(CC)CC	3.1e-06	3.26	5.50864	2.24864	7.78691	28	0.278104
CHEMBL3115187	s1cncc1COC(=O)N[C@@H](Cc1ccccc1)CC[C@@H](NC(=O)[C@@H](NC(=O)N(Cc1nc(sc1)C(C)C)C)CO)Cc1ccccc1	1.3e-06	3.64	5.88606	2.24606	8.32042	48	0.173342
CHEMBL1911523	FC(F)(F)CCCOc1cc(OCC=2Nc3c(cccc3)C(=O)C=2C)ccc1	1.4e-06	3.61	5.85387	2.24387	8.27492	28	0.295533
CHEMBL1594422	FC(F)(F)c1nn(c2c1CCCC2)-c1ccc(cc1)C(=O)N(C)C	6e-06	2.98	5.22185	2.24185	7.38151	24	0.307563
CHEMBL197293	O1c2c(cc(NC(OC)=O)cc2)CCC1C(=O)N([C@H](CN1C[C@@H](O)CC1)c1ccccc1)C	7.4e-06	2.89	5.13077	2.24077	7.25276	33	0.219781
CHEMBL180101	O1CCNC[C@H]1[C@@H](Oc1ccccc1OCC)c1ccccc1	3.16228e-06	3.26	5.5	2.24	7.7747	23	0.33803
CHEMBL180678	O(CC(O)CNC(C)C)c1ccc(OCC=C)cc1	2.1e-05	2.44	4.67778	2.23778	6.61242	19	0.348022
CHEMBL2112075	Cl.Clc1cccc(OC[C@@H](O)CNC(Cc2cc3c(cc2)cccc3)(C)C)c1C#N	4.5e-08	5.11	7.34679	2.23679	10.3853	30	0.346176
CHEMBL564446	Fc1ccc(cc1)Cn1c2c(nc1N1CCC(N(C)C3CCOCC3)CC1)cccc2	6.36e-06	2.96	5.19654	2.23654	7.34574	31	0.236959
CHEMBL1222939	Clc1ccccc1CN1c2c(N(C3CCN(CC3)C(=O)C3CCN(CC3)Cc3ccncc3)C1=O)cccc2	6.7e-06	2.95	5.17393	2.22393	7.31376	39	0.187532
CHEMBL1649662	S(=O)(=O)(C)c1ccc(-n2nc(c3CCCCc23)C(F)(F)F)cc1	6e-06	3	5.22185	2.22185	7.38151	23	0.320935
CHEMBL204640	O(CCCN1CCC(CC1)Cc1nc[nH]c1)c1ccc(cc1)-c1ncccn1	6e-06	3	5.22185	2.22185	7.38151	28	0.263625
CHEMBL494462	O1c2c(cccc2)C(=CC12CCNCC2)c1ccc(cc1)C(=O)N(CC)CC	4.3e-06	3.15	5.36653	2.21653	7.58603	28	0.27093
CHEMBL1224490	Fc1cc(cc2c1[nH]cc2)C(=O)C1(CCNC1)CC(C)C	1e-06	3.79	6	2.21	8.48149	21	0.40388
CHEMBL2347420	S(=O)(=O)(CCCn1nc(c2cc(OC(F)F)ccc12)-c1nc2c([nH]cc2C(=O)NC(C)(C)C)nc1)C	1.1e-05	2.75	4.95861	2.20861	7.0094	36	0.194705
CHEMBL249057	s1c(C(=O)C)c(nc1NC(=O)N[C@@H]1CS(=O)(=O)C[C@H]1CN1C[C@@H](CCC1)Cc1ccc(F)cc1)C	2.1e-06	3.47	5.67778	2.20778	8.026	35	0.229314
CHEMBL1669424	n1ccccc1CN(CCC=1Cc2c(cccc2)C=1[C@@H](C)c1nccnc1)C	5.707e-06	3.04	5.24359	2.20359	7.41224	28	0.264723
CHEMBL2338035	Clc1cc(F)ccc1O[C@H]([C@H]1CCNC1)c1ccccc1	5.0119e-07	4.1	6.3	2.2	8.90556	21	0.424074
CHEMBL204587	O(CCCN1CCC(CC1)Cc1nc[nH]c1)c1cc2c(nccc2)cc1	2e-06	3.5	5.69897	2.19897	8.05596	26	0.309845
CHEMBL2448712	s1c(ncc1C(=O)Nc1cc(ccc1-n1ccnc1)C#N)-c1ccccc1	2.7e-06	3.37	5.56864	2.19864	7.87172	27	0.291545
CHEMBL1669427	O1CCC(CC1)CN(CCC=1Cc2c(cccc2)C=1[C@@H](C)c1nccnc1)C	9.373e-06	2.83	5.02812	2.19812	7.10766	28	0.253845
CHEMBL1081860	S(=O)(=O)(Nc1cc2CCN(CCc2cc1)Cc1n[nH]cc1)c1ccc(cc1)C#N	7.9e-06	2.91	5.10237	2.19237	7.21262	29	0.248711
CHEMBL476116	O=C(N(Cc1ccccc1-c1ccccc1)[C@H]1CCNC1)C(C)C	1.86e-06	3.54	5.73049	2.19049	8.10051	24	0.337521
CHEMBL459165	[nH]1c2cc(ccc2cc1)C1(CCNC1)Cc1ccccc1	9e-07	3.86	6.04576	2.18576	8.54617	21	0.40696
CHEMBL230744	Fc1cc(ccc1C(C#N)(C)C)CCC1(OC(=O)C(Cc2nc3n(n2)C(=CC(=N3)C)C)=C(O)C1)C1CCCC1	3e-07	4.34	6.52288	2.18288	9.22062	39	0.236426
CHEMBL2178221	Clc1ccc(NC(=O)[C@H]2CN(C[C@@H]2c2ccc(cc2)\C=C\C(=O)Nc2ccccc2N)CCO)cc1	2e-06	3.52	5.69897	2.17897	8.05596	36	0.223777
CHEMBL345544	O(CCCC)c1ccc(-n2ncnc2)cc1	9.54e-06	2.85	5.02045	2.17045	7.09682	16	0.443551
CHEMBL1819090	Fc1cc(Cn2c3c(N(C)C(=O)N(C)C3=O)cc2N2C[C@@](N)(CCC2)C)c(cc1)C#N	3.8e-05	2.25	4.42022	2.17022	6.24834	31	0.201559
CHEMBL512127	S(=O)(=O)(C)c1ccccc1C(=O)N(CC(O)(CNC(=O)c1cnn(c1N)-c1ccc(F)cc1)C(F)(F)F)CC	9.6e-05	1.85	4.01773	2.16773	5.67939	39	0.145625
CHEMBL504606	O1Cc2c(cccc2)[C@@H](Oc2ccccc2C)[C@H]1CNC	4.1e-06	3.22	5.38722	2.16722	7.61527	21	0.362632
CHEMBL528995	Clc1cc(ccc1Cl)C12C(C1)CNC2	7e-06	2.99	5.1549	2.1649	7.28687	14	0.520491
CHEMBL22077	S1c2c(C(=O)c3c1cccc3)c(NCCN(CC)CC)ccc2CO	1.5e-06	3.66	5.82391	2.16391	8.23257	25	0.329303
CHEMBL1269994	Fc1c(cc(N[C@H](CCCCNCc2ccc(F)cc2)C(=O)NO)cc1C)C	1.35e-06	3.71	5.86967	2.15967	8.29725	28	0.29633
CHEMBL477611	S(=O)(=O)(N)c1cc(Nc2nc(N(C)c3cc4[nH]nc(c4cc3)C)ccn2)ccc1	4.8e-06	3.16	5.31876	2.15876	7.5185	29	0.259259
CHEMBL249858	s1c(C(=O)C)c(nc1NC(=O)N[C@@H]1CN(CC[C@H]1CN1C[C@@H](CCC1)Cc1ccc(F)cc1)C(=O)CN(C)C)C	5e-07	4.15	6.30103	2.15103	8.90702	40	0.222675
CHEMBL728	Clc1cc2N(c3c(Sc2cc1)cccc3)CCCN1CCN(CC1)C	3e-07	4.38	6.52288	2.14288	9.22062	25	0.368825
CHEMBL178201	S(CC(NCC(O)COc1ccc(cc1)CCOC)(C)C)c1ccccc1C	2.8e-07	4.41	6.55284	2.14284	9.26298	28	0.330821
CHEMBL2436981	[nH]1cc(c2cc(cnc12)-c1ccc(nc1)N)-c1cc2c([nH]cc2)cc1	3.7e-06	3.29	5.4318	2.1418	7.67829	25	0.307132
CHEMBL203983	O(CCCN1CCC(CC1)Cc1nc[nH]c1)c1ccc(cc1)-c1cnc(nc1)N	1.2e-05	2.78	4.92082	2.14082	6.95598	29	0.239861
CHEMBL1935445	S1CCNCC1c1nc2c(n1Cc1ccc(F)cc1)cccc2	6.6e-06	3.04	5.18046	2.14046	7.323	23	0.318391
CHEMBL442924	O=C(NC)c1[nH]c2c(cc(cc2)C2(CCNC2)Cc2ccccc2)c1	4.8e-06	3.18	5.31876	2.13876	7.5185	25	0.30074
CHEMBL448430	o1nc(nc1-c1nn(c2c1cccc2)Cc1cc(cc(c1)C)C)CN	3.73e-06	3.29	5.42829	2.13829	7.67333	25	0.306933
CHEMBL504231	[nH]1c2c(cc(cc2)C2(CCNC2)CCc2ccccc2)cc1	3e-07	4.39	6.52288	2.13288	9.22062	22	0.419119
CHEMBL481322	Clc1ccc2c(CC[C@H]2c2[nH]ccn2)c1COC	6.6e-06	3.05	5.18046	2.13046	7.323	18	0.406833
CHEMBL251232	s1c(C(=O)C)c(nc1NC(=O)N[C@@H]1CCOC[C@H]1CN1C[C@@H](CCC1)Cc1ccc(F)cc1)C	4.9e-07	4.18	6.3098	2.1298	8.91942	34	0.262336
CHEMBL1222798	O(CCN1c2c(N(C3CCN(CC3)C(=O)C3CCN(CC3)Cc3ccncc3)C1=O)cccc2)c1ccccc1	2e-05	2.57	4.69897	2.12897	6.64238	40	0.166059
CHEMBL1935436	Fc1ccc(cc1)Cn1c2c(nc1C1CCCN(C1)CCO)cccc2	4.4e-06	3.23	5.35655	2.12655	7.57192	26	0.291228
CHEMBL564	S1c2c(N(c3c1cccc3)CCCN(C)C)cccc2	3e-07	4.4	6.52288	2.12288	9.22062	20	0.461031
CHEMBL487763	[nH]1cc(c2c1cccc2)C(CCNC)c1ccccc1	3.1e-06	3.39	5.50864	2.11864	7.78691	20	0.389345
CHEMBL558468	O(C)c1ccc(cc1)Cn1c2c(nc1N1CCC(N(C)C)CC1)cccc2	6.072e-06	3.1	5.21667	2.11667	7.37419	27	0.273118
CHEMBL442272	FC(F)(F)c1ccccc1CN([C@H]1CCNC1)C1CCOCC1	3e-05	2.41	4.52288	2.11288	6.39346	23	0.277976
CHEMBL1935431	Fc1ccc(cc1)Cn1c2c(nc1C1CCCN(C1)CC(=O)N(C)C)cccc2	2.4e-06	3.51	5.61979	2.10979	7.94403	29	0.273932
CHEMBL563700	O1c2c(cccc2)C(=CC12CCCNC2)c1ccc(cc1)C(=O)N(CC)CC	2.2e-06	3.55	5.65758	2.10758	7.99745	28	0.285623
CHEMBL188237	Fc1ccc(cc1)C(O)C1CCN(CC1)CCCC(=O)c1ccc(F)cc1	1.6e-06	3.69	5.79588	2.10588	8.19295	27	0.303443
CHEMBL2036270	Cl.s1cccc1C(Nc1cc2c([nH]cc2C2CCC(NCC)CC2)cc1)=N	9.27e-07	3.93	6.03292	2.10292	8.52802	27	0.315853
CHEMBL252556	O(C)C=1C(=O)C(CCCCCCCCCCO)=C(C)C(=O)C=1OC	3e-06	3.42	5.52288	2.10288	7.80704	24	0.325293
CHEMBL250437	s1c(C(=O)C)c(nc1NC(=O)N[C@@H]1CCN(C[C@H]1CN1C[C@@H](CCC1)Cc1ccc(F)cc1)CC#N)C	2e-06	3.6	5.69897	2.09897	8.05596	37	0.217729
CHEMBL3094127	o1nc(cc1C)C(=O)N1CCC(Oc2cc3CCN(CCc3cc2)C2CCC2)CC1	4.3e-05	2.27	4.36653	2.09653	6.17245	30	0.205748
CHEMBL403743	s1c(C(=O)C)c(nc1NC(=O)N[C@@H]1CN(CC[C@H]1CN1C[C@@H](CCC1)Cc1ccc(F)cc1)C(=O)C1CCOCC1)C	1.8e-06	3.65	5.74473	2.09473	8.12064	42	0.193349
CHEMBL762	Oc1c(C)c(CC=2NCCN=2)c(cc1C(C)(C)C)C	2e-07	4.61	6.69897	2.08897	9.46954	19	0.498397
CHEMBL559456	Clc1c(OC(C2CCNCC2)c2cccnc2)cccc1Cl	2e-06	3.61	5.69897	2.08897	8.05596	22	0.36618
CHEMBL494982	O1C(=NC(CC1C)(C)C)c1cc(ccc1)Cc1nc[nH]c1	2.92e-07	4.45	6.53462	2.08462	9.23721	21	0.439867
CHEMBL196813	O1c2c(cc(cc2)CNC(OC)=O)CC[C@H]1C(=O)N([C@H](CN1C[C@@H](O)CC1)c1ccccc1)C	1.4e-05	2.77	4.85387	2.08387	6.86134	34	0.201804
CHEMBL443952	O1Cc2c(cccc2)[C@@H](Oc2ccccc2C)[C@@H]1CNC	5e-06	3.22	5.30103	2.08103	7.49344	21	0.35683
CHEMBL2206509	Fc1ccc(cc1)[C@H]1c2c(cc(cc2)C)CN(C1)C	4.8e-07	4.24	6.31876	2.07876	8.93208	19	0.470109
CHEMBL1288260	Cl.Clc1ccc(F)cc1Cn1c2c(N(C)C(=O)N(C)C2=O)cc1N1C[C@@](N)(CCC1)C	3.4e-06	3.39	5.46852	2.07852	7.7302	31	0.249361
CHEMBL359496	O(CC(O)CNC(C)C)c1c2c(cccc2)c(NC(=O)C)cc1	0.0001	1.93	4	2.07	5.65433	23	0.24584
CHEMBL2012836	Fc1c(cc(N[C@@H](CCCCNC(CC)c2ccc(F)cc2)C(=O)NO)cc1C)C	2.4e-07	4.55	6.61979	2.06979	9.35761	30	0.31192
CHEMBL272068	Fc1ccc(cc1)C[C@@H]1CCCN(C1)CCCNC(=O)Nc1cc(cc(c1)C(C(O)=O)(C)C)-c1nnnn1C	2.2e-05	2.59	4.65758	2.06758	6.58386	39	0.168817
CHEMBL455447	O([C@H]1c2c(C[C@H]1CNC)cccc2)c1ccccc1C	8e-07	4.03	6.09691	2.06691	8.61848	20	0.430924
CHEMBL550261	O1c2c(cccc2)C(=CC12CCNCC2)c1ccc(cc1)C(=O)N1CCCCC1	4.4e-06	3.29	5.35655	2.06655	7.57192	29	0.261101
CHEMBL114555	O(CCN1CCN(CC1)C(OCC)=O)c1ccc(-n2ccnc2)cc1	3.2e-06	3.43	5.49485	2.06485	7.76742	25	0.310697
CHEMBL247340	Clc1c(cccc1C)CN([C@H]1CCNC1)C1CCOCC1	1.57e-05	2.74	4.8041	2.0641	6.79099	21	0.32338
CHEMBL391963	FC(F)(F)c1cc(cc(c1)C(F)(F)F)CN(C(=O)[C@H]1CN(C[C@@H]1c1ccccc1)C(=O)C1CCN(CC1)C(=O)C)C	2.4e-05	2.56	4.61979	2.05979	6.53045	41	0.159279
CHEMBL1669425	n1ccncc1[C@H](C)C=1c2c(CC=1CCN(Cc1ccncc1)C)cccc2	7.957e-06	3.04	5.09925	2.05925	7.20821	28	0.257436
CHEMBL391070	O(C)c1cc2CCN3[C@@H](C[C@@H](N)[C@@H](C3)c3cc(ccc3)C)c2cc1OC	1.1e-05	2.9	4.95861	2.05861	7.0094	26	0.269592
CHEMBL2036268	Cl.s1cccc1C(Nc1cc2c([nH]cc2C2CCC(NC)CC2)cc1)=N	3.48e-06	3.4	5.45842	2.05842	7.71592	26	0.296766
CHEMBL562569	O=C(N(CC1CCC1)[C@H]1CCNC1)c1ccccc1C1CCCC1	4.3e-07	4.31	6.36653	2.05653	8.99961	24	0.374984
CHEMBL1269894	FC(F)(F)c1ccc(nc1)N[C@H]1CCN(C1)C(OC1C2CC3(CC1CC(C3)C2)C(=O)N)=O	1.16e-05	2.88	4.93554	2.05554	6.97679	32	0.218025
CHEMBL1271320	FC(F)(F)c1ccc(nc1)N[C@@H]1CCN(C1)C(OC1C2CC3(CC1CC(C3)C2)C(=O)N)=O	1.16e-05	2.88	4.93554	2.05554	6.97679	32	0.218025
CHEMBL1092598	s1ccnc1[C@H](C)C=1c2c(CC=1CCN(C)C)cccc2	3.8e-06	3.37	5.42022	2.05022	7.66192	21	0.364853
CHEMBL1911524	O(CC=1Nc2c(cccc2)C(=O)C=1C)c1cc(OCCC(OC)(C)C)ccc1	2.9e-06	3.49	5.5376	2.0476	7.82785	28	0.279566
CHEMBL218068	O(Cc1ccccc1)C(=O)N1CCC(CC1)CNc1ncncc1	1.3e-06	3.84	5.88606	2.04606	8.32042	24	0.346684
CHEMBL1935444	S1CCNCC1c1nc2c(n1Cc1ccc(cc1)C)cccc2	3.6e-06	3.4	5.4437	2.0437	7.69511	23	0.33457
CHEMBL1794073	Cl.S(=O)(=O)(N)c1cc(Nc2nc(N(C)c3cc4n(nc(c4cc3)C)C)ccn2)ccc1	6.3e-06	3.16	5.20066	2.04066	7.35156	31	0.237147
CHEMBL1762472	Cl.Clc1cc(O[C@@H](CCNC)c2ccccc2)c(cc1)C#N	1e-06	3.96	6	2.04	8.48149	22	0.385522
CHEMBL486538	[nH]1c2ncc(cc2cc1)C1(CCNC1)Cc1ccccc1	1.15e-05	2.9	4.9393	2.0393	6.98211	21	0.332481
CHEMBL3084359	Fc1cc2c(cc(cc2)CN2[C@H]3CC(NC(=O)c4ccccc4-c4cncnc4)C[C@@H]2CC3)cc1.OC(=O)\C=C\C(O)=O	2.9e-06	3.5	5.5376	2.0376	7.82785	43	0.182043
CHEMBL1172744	O(C[C@]12C[C@]1(CCNC2)c1cc2c(cc1)cccc2)C	8e-06	3.06	5.09691	2.03691	7.2049	20	0.360245
CHEMBL1088898	n1ccnc(C)c1CC=1c2c(CC=1CCN(C)C)cccc2	2.2e-05	2.63	4.65758	2.02758	6.58386	22	0.299267
CHEMBL1642906	Clc1cc(ccc1Cl)[C@@H]1C[C@H](Cc2c1cccc2)CNC	4.1e-08	5.36	7.38722	2.02722	10.4424	21	0.497259
CHEMBL100917	ON\C=N\c1ccccc1CCCC	3.2e-05	2.47	4.49485	2.02485	6.35384	14	0.453845
CHEMBL1669416	FC1(F)CCN(C1)CCC=1Cc2c(cccc2)C=1Cc1nccnc1	7.533e-06	3.1	5.12303	2.02303	7.24182	25	0.289673
CHEMBL2152525	N1(CCCC1)[C@@H]([C@H](N1CCCC1)c1ccccc1)c1ccccc1	1.9953e-07	4.68	6.69999	2.01999	9.47098	24	0.394624
CHEMBL1911522	O(CC=1Nc2c(cccc2)C(=O)C=1C)c1cc(OCCCC)ccc1	7.8e-07	4.09	6.10791	2.01791	8.63402	25	0.345361
CHEMBL398811	Fc1cc(cc(F)c1)C1(Oc2c(N(CC(=O)NCC)C1=O)cc(cc2)-c1c(nc(nc1N)N)CC)C	1.89e-06	3.71	5.72354	2.01354	8.09069	36	0.224741
CHEMBL249855	s1c(C(=O)C)c(nc1NC(=O)N[C@@H]1CN(CC[C@H]1CN1C[C@@H](CCC1)Cc1ccc(F)cc1)C(=O)COC)C	1.2e-06	3.91	5.92082	2.01082	8.36956	39	0.214604
CHEMBL549825	Clc1c(OC([C@@H]2CCCNC2)c2cccnc2)cccc1Cl	2.4e-06	3.61	5.61979	2.00979	7.94403	22	0.361092
CHEMBL19215	O(Cc1ccccc1)C(=O)NC[C@@H]1C[C@H]2[C@H](N(C1)C)Cc1c3c2cccc3n(c1)C	2e-07	4.69	6.69897	2.00897	9.46954	30	0.315651
CHEMBL498141	FC(F)(F)c1ccccc1O[C@@H]1c2c(CO[C@@H]1CNC)cccc2	1.4e-06	3.85	5.85387	2.00387	8.27492	24	0.344789
CHEMBL1078208	S(=O)(=O)(Nc1cc2CCN(CCc2cc1)Cc1n[nH]cc1)c1ccc(OC(C)C)cc1	1.3e-06	3.89	5.88606	1.99606	8.32042	31	0.268401
CHEMBL557458	O1c2c(cccc2)C(=CC12CCNCC2)c1cc(O)c(cc1)C(=O)N(CC)CC	9.5e-06	3.03	5.02228	1.99228	7.0994	29	0.244807
CHEMBL639	Clc1ccc(cc1)CC1=NN(C2CCCN(CC2)C)C(=O)c2c1cccc2	1e-06	4.01	6	1.99	8.48149	27	0.314129
CHEMBL3216551	Cl.Cl.o1cccc1C(Nc1cc2c([nH]cc2C=2CCN(CC=2)C)cc1)=N	2.05e-05	2.7	4.68825	1.98825	6.62722	26	0.254893
CHEMBL1090528	s1ccnc1[C@H](C)C=1c2c(CC=1CCN(C)C)cc(cc2)C	1.4e-06	3.87	5.85387	1.98387	8.27492	22	0.376133
CHEMBL552026	Fc1ccc(cc1)Cn1c2c(nc1N1CCC(N3CCCCC3=O)CC1)cccc2	4.353e-06	3.38	5.36121	1.98121	7.57851	30	0.252617
CHEMBL525532	O1Cc2c(cccc2)[C@@H](Oc2ccccc2C)[C@H]1CN	1.2e-05	2.94	4.92082	1.98082	6.95598	20	0.347799
CHEMBL245492	Fc1cccc(CN([C@H]2CCNC2)C2CCOCC2)c1C(F)(F)F	3e-05	2.55	4.52288	1.97288	6.39346	24	0.266394
CHEMBL563055	O1CCC(CC1)CNC1CCN(CC1)c1nc2c(n1Cc1ccc(OC)cc1)cccc2	1.6309e-05	2.82	4.78757	1.96757	6.76762	32	0.211488
CHEMBL1093623	s1ccnc1[C@@H](C)C=1c2c(CC=1CCN(C)C)cc(OC)cc2	5.6e-06	3.29	5.25181	1.96181	7.42386	23	0.322777
CHEMBL390526	Fc1cc(Nc2nc(C(F)(F)F)c(cn2)C(=O)NCC2CCOCC2)cc(F)c1	4.5e-05	2.39	4.34679	1.95679	6.14454	29	0.211881
CHEMBL557121	O1c2c(cccc2)C(CC12CCNCC2)c1ccc(cc1)C(=O)N(CC)CC	6.2e-06	3.26	5.20761	1.94761	7.36138	28	0.262906
CHEMBL1098230	S(CCc1nc[nH]c1)c1ccc(cc1)C(C)(C)C	6.8e-07	4.22	6.16749	1.94749	8.71825	18	0.484347
CHEMBL409494	Fc1ccccc1NC(=O)CCN1CCC(CC1)c1ccc(cc1)C(=O)Nc1ccccc1N	1e-05	3.06	5	1.94	7.06791	34	0.20788
CHEMBL1935441	O1CCNC[C@@H]1c1nc2c(n1Cc1ccc(cc1)C)cccc2	2.83e-05	2.61	4.54821	1.93821	6.42927	23	0.279533
CHEMBL2418364	O=C(N1C[C@H]2[C@H](CN(C2)c2ncccc2)C1)C12CC3CC(C1)CC(C2)C3	2.43e-05	2.68	4.61439	1.93439	6.52282	26	0.250878
CHEMBL1223158	n1nnn(Cc2ccccc2)c1C(N1CCCN(CC1)C1CCC1)c1ccc(cc1)CN1CCN(CC1)C	1.7e-06	3.84	5.76955	1.92955	8.15573	38	0.214624
CHEMBL220660	O(Cc1ccccc1)C(=O)N1CCC(CC1)CNc1nccnc1	1.7e-06	3.84	5.76955	1.92955	8.15573	24	0.339822
CHEMBL522295	Fc1cc2c(cc(cc2)CN2C3CC(NC(=O)c4ccccc4-c4ccccc4)CC2CC3)cc1	2e-08	5.77	7.69897	1.92897	10.8831	35	0.310946
CHEMBL1090526	Fc1cc2CC(CCN(C)C)=C(c2cc1)[C@@H](C)c1nccnc1OC	6.4e-06	3.27	5.19382	1.92382	7.34189	25	0.293675
CHEMBL1224089	Clc1cc(ccc1N)C(=O)C1(NCCC1)CCC	7e-06	3.24	5.1549	1.9149	7.28687	18	0.404826
CHEMBL382838	[nH]1c2c(nc1)cc(cc2)-c1c2n(nc1-c1nc(ccc1)C)CCC2	2.7e-05	2.66	4.56864	1.90864	6.45814	24	0.269089
CHEMBL2338405	Clc1cc(NC(=O)CN2CCN(CC2)CCNC(=O)NC(C)(C)C)cc(Cl)c1	8e-06	3.19	5.09691	1.90691	7.2049	28	0.257318
CHEMBL114756	FC(F)(F)CNC(=O)[C@H]1N(CCN(C1)Cc1oc(cc1)-c1ccncc1)C[C@@H](O)C[C@@H](Cc1ccccc1)C(=O)N[C@H]1c2c(OC[C@H]1O)cccc2	5.3e-07	4.37	6.27572	1.90572	8.87125	52	0.170601
CHEMBL562873	Fc1cc(ccc1C(=O)N(CC)CC)C1=CC2(Oc3c1cccc3)CCNCC2	5.3e-06	3.37	5.27572	1.90572	7.45767	29	0.257161
CHEMBL251045	s1c(C(=O)C)c(nc1NC(=O)N[C@@H]1CN(CC[C@H]1CN1C[C@@H](CCC1)Cc1ccc(F)cc1)CC(=O)N(C)C)C	7.4e-07	4.23	6.13077	1.90077	8.66634	40	0.216659
CHEMBL320105	O(CCCCCC)c1ncc(-n2ccnc2)cc1	1e-06	4.1	6	1.9	8.48149	18	0.471194
CHEMBL525717	Clc1ccccc1O[C@@H]1c2c(CO[C@@H]1CNC)cccc2	5.7e-06	3.35	5.24413	1.89413	7.413	21	0.353
CHEMBL196967	S(=O)(=O)(Nc1cc2CC[C@@H](Oc2cc1)C(=O)N([C@H](CN1C[C@@H](O)CC1)c1ccccc1)C)CCC	6.7e-06	3.28	5.17393	1.89393	7.31376	35	0.208965
CHEMBL563920	o1c2c(cccc2)c([C@@H](C)c2ncccc2)c1CCN(C)C	3.3e-06	3.59	5.48149	1.89149	7.74853	22	0.352206
CHEMBL2036273	Cl.s1cccc1C(Nc1cc2c([nH]cc2C2CC(NC)CCC2)cc1)=N	5.14e-06	3.4	5.28904	1.88904	7.47648	26	0.287557
CHEMBL556648	O1c2c(cccc2)[C@@H](CC12CCNCC2)c1ccc(cc1)C(=O)N(CC)CC	7.1e-06	3.26	5.14874	1.88874	7.27817	28	0.259934
CHEMBL514447	[nH]1cc(c2c1cccc2)C1(CCNC1)Cc1ccccc1	1.8e-06	3.86	5.74473	1.88473	8.12064	21	0.386697
CHEMBL3087355	Clc1cc(S(=O)(=O)Nc2ccc(cc2)-c2ccncc2)cc(Cl)c1	2e-07	4.82	6.69897	1.87897	9.46954	24	0.394564
CHEMBL195561	Clc1cc(C=2c3cc(ccc3N(CC#N)C(=O)C=2CCO)C(F)(F)F)c(O)cc1	2.3e-05	2.76	4.63827	1.87827	6.55658	29	0.226089
CHEMBL404857	s1c(C(=O)C)c(nc1NC(=O)N[C@@H]1CN(CC[C@H]1CN1C[C@@H](CCC1)Cc1ccc(F)cc1)CC#N)C	4.1e-07	4.51	6.38722	1.87722	9.02885	37	0.244023
CHEMBL559060	Fc1ccc(cc1)Cn1c2c(nc1N1CCC(NCC3CCOCC3)CC1)cccc2	1.2134e-05	3.04	4.916	1.876	6.94916	31	0.224166
CHEMBL563893	O1c2c(cccc2)C(=CC12CCCNCC2)c1ccc(cc1)C(=O)N(CC)CC	2.6e-06	3.71	5.58503	1.87503	7.89489	29	0.272238
CHEMBL493001	O(C)c1cc(cc(OC)c1O)\C=C\C(=O)\C=C\c1cc(OC)c(O)c(OC)c1	8.27e-05	2.21	4.08249	1.87249	5.77094	28	0.206105
CHEMBL1552719	S(Cc1onc(n1)-c1ccc(cc1)C)c1nnc(n1-c1ccc(OC)cc1)-c1ccncc1	1.2e-06	4.05	5.92082	1.87082	8.36956	33	0.253623
CHEMBL404618	Fc1ccc(cc1)C[C@@H]1CCCN(C1)CC[C@H](NC(=O)Nc1cc(cc(c1)C(C(O)=O)(C)C)-c1nnnn1C)C	1.7e-05	2.9	4.76955	1.86955	6.74215	40	0.168554
CHEMBL423	O(CC(O)CNC(C)C)c1ccc(cc1)CCOCC1CC1	6.6e-05	2.32	4.18046	1.86046	5.90941	22	0.26861
CHEMBL29609	FC(F)(F)c1onc(n1)-c1cc(C)c(OCCCc2onc(c2)C)c(c1)C	1.25893e-06	4.04	5.9	1.86	8.34013	27	0.308894
CHEMBL478402	S(=O)(=O)(N)c1cc(Nc2nc(N(C)c3cc4nn(cc4cc3)C)ccn2)ccc1	1.8e-05	2.89	4.74473	1.85473	6.70706	29	0.231278
CHEMBL249857	s1c(C(=O)C)c(nc1NC(=O)N[C@@H]1CN(CC[C@H]1CN1C[C@@H](CCC1)Cc1ccc(F)cc1)C(=O)NC)C	1.2e-06	4.07	5.92082	1.85082	8.36956	38	0.220252
CHEMBL461143	O([C@H]1c2c(C[C@@]1(O)CNC)cccc2)c1cccc(C)c1C	4e-06	3.55	5.39794	1.84794	7.63043	22	0.346838
CHEMBL402707	s1c(C(=O)C)c(nc1NC(=O)N[C@@H]1CN(CC[C@H]1CN1C[C@@H](CCC1)Cc1ccc(F)cc1)C(=O)CC)C	1.5e-06	3.98	5.82391	1.84391	8.23257	38	0.216647
CHEMBL534942	Cl.Clc1ccccc1CC(N1CCNCC1)c1ccccc1	5e-07	4.46	6.30103	1.84103	8.90702	22	0.404864
CHEMBL201971	Clc1cc(NCC(=O)N([C@H](CN2C[C@@H](O)CC2)c2ccccc2)C)ccc1Cl	7.6e-07	4.28	6.11919	1.83919	8.64997	28	0.308927
CHEMBL2178223	Clc1ccc(NC(=O)[C@H]2CN(C[C@@H]2c2ccc(cc2)\C=C\C(=O)Nc2ccccc2N)CC(O)(C)C)cc1	7e-07	4.32	6.1549	1.8349	8.70045	38	0.228959
CHEMBL3087349	Clc1cc(S(=O)(=O)Nc2ccc(cc2)-c2ocnn2)cc(Cl)c1	1.51e-05	2.99	4.82102	1.83102	6.81491	23	0.2963
CHEMBL1643518	Clc1cc(N2C[C@@H](NC)Cc3c2cccc3)ccc1Cl	1e-07	5.17	7	1.83	9.89507	20	0.494753
CHEMBL2448709	Brc1cc2c(cc(OCC(O)CNC3CCN(CC3)C)cc2)cc1	1.7e-05	2.94	4.76955	1.82955	6.74215	24	0.280923
CHEMBL556093	O=C(N(CC1CCC1)[C@H]1CCNC1)c1ccccc1C(C)C	3.17e-06	3.67	5.49894	1.82894	7.7732	22	0.353327
CHEMBL1095819	Fc1ccc(cc1)Cn1c2c(nc1[C@@H]1CCCN(C1)C)cccc2	2.3e-06	3.81	5.63827	1.82827	7.97016	24	0.33209
CHEMBL253376	Brc1cc(Br)cc(CN(C)C2CCCCC2)c1N	1.958e-07	4.88	6.70819	1.82819	9.48257	18	0.526809
CHEMBL3114719	s1cncc1COC(=O)N[C@@H](CC[C@@H](NC(=O)[C@@H](NC(=O)N(Cc1nc(sc1)C(C)C)C)C(C)C)CC)CC	6.5e-06	3.36	5.18709	1.82709	7.33237	39	0.188009
CHEMBL508368	Brc1cc2c3c([nH]c2cc1)[C@H](N[C@@H](C)c1ccccc1)CCC3	1.6e-07	4.97	6.79588	1.82588	9.60653	23	0.417675
CHEMBL379885	O(CCCN1CCC(CC1)Cc1nc[nH]c1)c1ccc(N2CCCCC2)cc1	1e-06	4.18	6	1.82	8.48149	28	0.30291
CHEMBL2152524	N1(CCCC1)[C@H]([C@@H](N1CCCC1)c1ccccc1)c1ccccc1	3.1623e-07	4.68	6.5	1.82	9.18827	24	0.382845
CHEMBL58	Oc1c2c(C(=O)c3c(C2=O)c(NCCNCCO)ccc3NCCNCCO)c(O)cc1	7.63e-05	2.3	4.11748	1.81748	5.82039	32	0.181887
CHEMBL1243367	S(CC(c1ccncc1)c1nc[nH]c1)c1ccc(cc1)C(F)(F)F	4.3e-06	3.55	5.36653	1.81653	7.58603	24	0.316085
CHEMBL511893	o1nc(nc1-c1nn(c2c1cccc2)Cc1ccc(NC(=O)C)cc1)CNC(OC(C)(C)C)=O	1.3e-05	3.07	4.88606	1.81606	6.90684	34	0.203142
CHEMBL187216	Clc1cc2ncc(CN)c(NCCCC)c2cc1	2.2e-06	3.85	5.65758	1.80758	7.99745	18	0.444303
CHEMBL240566	O1c2c(N(CCCOC)C(=O)C1(CC)C)cc(cc2)-c1c(nc(nc1N)N)CC	8.2e-06	3.28	5.08619	1.80619	7.18974	29	0.247922
CHEMBL2337980	Clc1cc(cc(Cl)c1)C(=O)NCC1(O)CCN(CC1)CCNC(=O)NC(C)(C)C	1.4e-05	3.05	4.85387	1.80387	6.86134	29	0.236598
CHEMBL407828	FC(F)(F)CNC(=O)[C@H]1N(CCN(C1)C(C)(C)c1oc(cc1)-c1ccncc1)C[C@@H](O)C[C@@H](Cc1ccccc1)C(=O)NC1C2C(OC[C@H]1O)C=CC=C2	3.6e-07	4.64	6.4437	1.8037	9.10869	54	0.168679
CHEMBL1081504	[nH]1c2c(ncnc2NCc2c(cccc2C)C)c(C)c1C	3e-07	4.72	6.52288	1.80288	9.22062	21	0.439077
CHEMBL399150	s1c(C(=O)C)c(nc1NC(=O)N[C@@H]1CN(CC[C@H]1CN1C[C@@H](CCC1)Cc1ccc(F)cc1)C(=O)C(C)C)C	8.1e-07	4.29	6.09152	1.80151	8.61085	39	0.220791
CHEMBL2019022	S(Cc1ncccc1)c1[nH]c2c(n1)cc(OC)cc2	1.315e-05	3.08	4.88107	1.80107	6.8998	19	0.363147
CHEMBL2338053	Fc1c(O[C@@H]([C@@H]2CCNC2)c2ccccc2)c(F)c(F)cc1F	3.98107e-06	3.6	5.4	1.8	7.63334	23	0.331884
CHEMBL2012837	Fc1c(cc(O[C@@H](CCCCNC(CC)c2ccc(F)cc2)C(=O)NO)cc1C)C	3.4e-07	4.67	6.46852	1.79852	9.14378	30	0.304793
CHEMBL404416	s1c(C(=O)C)c(nc1NC(=O)N[C@@H]1COCC[C@H]1CN1C[C@@H](CCC1)Cc1ccc(F)cc1)C	4.4e-07	4.56	6.35655	1.79655	8.9855	34	0.264279
CHEMBL52440	O(C)c1cc2[C@]34[C@@H]([C@@H](N(CC3)C)Cc2cc1)CCCC4	1.8e-06	3.95	5.74473	1.79473	8.12064	20	0.406032
CHEMBL325829	FC(F)(F)CNC(=O)[C@H]1N(CCN(C1)Cc1oc2c(c1)cccc2)C[C@@H](O)C[C@@H](Cc1ccncc1)C(=O)N[C@H]1c2c(OC[C@H]1O)cccc2	3.6e-06	3.65	5.4437	1.7937	7.69511	50	0.153902
CHEMBL1087089	Fc1ccc(cc1)Cn1c2c(nc1C1CCCN(C1)C)cccc2	2.5e-06	3.81	5.60206	1.79206	7.91897	24	0.329957
CHEMBL1669411	FC(F)(F)CCN(CCC=1Cc2c(cccc2)C=1[C@@H](C)c1nccnc1)C	7.224e-06	3.35	5.14122	1.79122	7.26754	27	0.269168
CHEMBL426487	O=C(Nc1ccc(cc1)CN1CCCCC1)CCN1CCC(CC1)Cc1nc[nH]c1	9e-06	3.26	5.04576	1.78576	7.13259	30	0.237753
CHEMBL1935446	S1CCNC[C@@H]1c1nc2c(n1Cc1ccc(F)cc1)cccc2	1.5e-05	3.04	4.82391	1.78391	6.81899	23	0.296478
CHEMBL2326690	o1c2c(cc1C1CC=CCNC1)cccc2	7.8e-06	3.33	5.10791	1.77791	7.22044	16	0.451277
CHEMBL1223237	o1c2c(cc(cc2)C(N2CCCN(CC2)C2CCC2)c2nnnn2Cc2ccccc2)cc1	1e-06	4.23	6	1.77	8.48149	33	0.257015
CHEMBL2018906	S(CC)c1[nH]c2c(n1)cc(OC)cc2	4.93e-06	3.54	5.30715	1.76715	7.50209	14	0.535864
CHEMBL1210552	S(CCCN1CC2(C(C2)C1)c1ccc(S(F)(F)(F)(F)F)cc1)c1nnc(n1C)-c1ocnc1C	8e-06	3.33	5.09691	1.76691	7.2049	34	0.211909
CHEMBL401159	s1c(C(=O)C)c(nc1NC(=O)N[C@@H]1CCN(C[C@H]1CN1C[C@@H](CCC1)Cc1ccc(F)cc1)C(=O)CN(C)C)C	5.1e-06	3.53	5.29243	1.76243	7.48128	40	0.187032
CHEMBL150146	O(CCCC)c1ccc(cc1)-c1nccnc1	6.59e-06	3.42	5.18111	1.76111	7.32393	17	0.430819
CHEMBL490	Fc1ccc(cc1)[C@@H]1CCNC[C@H]1COc1cc2OCOc2cc1	1e-06	4.24	6	1.76	8.48149	24	0.353395
CHEMBL641	O([C@@H](CCNC)c1ccccc1)c1ccccc1C	2e-06	3.94	5.69897	1.75897	8.05596	19	0.423998
CHEMBL497461	O1C[C@@H](CNC)[C@@H](Oc2ccccc2C)c2c1cccc2	5.8e-06	3.48	5.23657	1.75657	7.40232	21	0.352491
CHEMBL559414	Fc1cc(ccc1C1=CC2(Oc3c1cccc3)CCNCC2)C(=O)N(CC)CC	7.5e-06	3.37	5.12494	1.75494	7.24452	29	0.249811
CHEMBL403838	Fc1ccc(cc1)C[C@@H]1CCCN(C1)[C@H](O)C[C@H](NC(=O)Nc1cc(ccc1)-c1nnnn1C)C(C)C	3e-07	4.77	6.52288	1.75288	9.22062	37	0.249206
CHEMBL560741	Fc1ccc(cc1)CC=1c2c(CC=1CCN(C)C)cccc2	3e-07	4.77	6.52288	1.75288	9.22062	22	0.419119
CHEMBL255462	Clc1cc2N(CC(=O)N3CCCC(C3CN3CCCC3)c3ccccc3)C(Sc2cc1)=O	1.7e-06	4.02	5.76955	1.74955	8.15573	32	0.254867
CHEMBL561878	O(c1ccccc1C(=O)N([C@H]1CCNC1)C1CCC1)c1ccccc1	3.37e-06	3.73	5.47237	1.74237	7.73564	25	0.309426
CHEMBL436101	S(=O)(=O)(Nc1cc2CC[C@@H](Oc2cc1)C(=O)N([C@H](CN1C[C@@H](O)CC1)c1ccccc1)C)CCC	9.5e-06	3.28	5.02228	1.74228	7.0994	35	0.20284
CHEMBL404586	Fc1ccc(cc1)C[C@@H]1CCCN(C1)[C@H](NC(=O)C)C[C@H](NC(=O)Nc1cc(ccc1)-c1nnnn1C)C	3.8e-06	3.68	5.42022	1.74022	7.66192	38	0.201629
CHEMBL1175	s1cccc1[C@@H](Oc1c2c(ccc1)cccc2)CCNC	1e-06	4.26	6	1.74	8.48149	21	0.40388
CHEMBL558663	O1CCC(CC1)CN(C)C1CCN(CC1)c1nc2c(n1Cc1ccc(OC)cc1)cccc2	8.185e-06	3.35	5.08698	1.73698	7.19086	33	0.217905
CHEMBL1224092	O=C(C1(NCCC1)CCC)c1cc2c([nH]nc2)cc1	1.5e-05	3.09	4.82391	1.73391	6.81899	19	0.358894
CHEMBL1224093	O=C(C1(NCCC1)CC(C)C)c1cc2c([nH]nc2)cc1	6e-06	3.49	5.22185	1.73185	7.38151	20	0.369075
CHEMBL313623	FC(F)(F)CNC(=O)[C@H]1N(CCN(C1)C(C)(C)c1oc(cn1)-c1cccnc1)C[C@@H](O)C[C@@H](Cc1ccccc1)C(=O)NC1C2C(OC[C@H]1O)C=CC=C2	1.05e-05	3.25	4.97881	1.72881	7.03795	54	0.130332
CHEMBL478834	O(CC)C(=O)N(Cc1ccccc1-c1ccccc1)[C@H]1CCNC1	1.21e-06	4.19	5.91721	1.72721	8.36446	24	0.348519
CHEMBL255460	Clc1cc2N(CC(=O)N3CCCC(C3CN3CCOCC3)c3ccccc3)C(Sc2cc1)=O	8e-06	3.37	5.09691	1.72691	7.2049	33	0.21833
CHEMBL2441342	Fc1c2CCN(c2ccc1-c1c2c(ncnc2N)n(c1)C)C(=O)Cc1nc(ccc1)C(F)(F)F	2.37e-05	2.9	4.62525	1.72525	6.53817	34	0.192299
CHEMBL556506	n1ccncc1[C@H](C)C=1c2c(CC=1CCN(C)C)cccc2	5e-05	2.58	4.30103	1.72103	6.07986	22	0.276357
CHEMBL551536	O1c2c(cccc2)C(=CC12CCNCC2)c1ccc(cc1)C(=O)N(Cc1ccccc1)C	1e-06	4.28	6	1.72	8.48149	32	0.265047
CHEMBL360757	O(CC(O)CNC(Cc1c2c([nH]c1)cccc2)(C)C)c1ccc(cc1C#N)CCC(OCC)=O	2.1e-06	3.96	5.67778	1.71778	8.026	34	0.236059
CHEMBL190353	S(=O)(=O)(NCc1ccc(cc1)CC(=O)N([C@H](CN1C[C@@H](O)CC1)c1ccccc1)C)c1ccc(F)cc1	5.792e-06	3.52	5.23717	1.71717	7.40317	37	0.200086
CHEMBL593763	Clc1cc(ccc1)COc1cc2OC(=O)C=C(c2cc1)CNC.S(O)(=O)(=O)C	5e-06	3.59	5.30103	1.71103	7.49344	28	0.267623
CHEMBL2205043	Cl.Clc1ccc(Sc2ccccc2N2CCNCC2)cc1	4e-07	4.69	6.39794	1.70794	9.04401	21	0.430667
CHEMBL1952142	FC(F)(F)Oc1cc(-n2nnc3c2nc(NCC2CCNCC2)cc3OC)ccc1	5e-07	4.6	6.30103	1.70103	8.90702	30	0.296901
CHEMBL497031	FC1(F)CCN(CC1)C(=O)c1n(c2c(c1)cc(OC1CCN(CC1)C(C)C)cc2)C(C)C	5e-06	3.6	5.30103	1.70103	7.49344	32	0.23417
CHEMBL631	O(CC(O)CNCCC)c1ccccc1C(=O)CCc1ccccc1	4.6034e-06	3.64	5.33692	1.69692	7.54417	25	0.301767
CHEMBL1243335	S(CC(c1ncccc1)c1nc[nH]c1)c1ccc(cc1)C(C)(C)C	8.2e-07	4.39	6.08619	1.69619	8.60332	24	0.358472
CHEMBL445	N(CCC=C1c2c(CCc3c1cccc3)cccc2)C	1e-06	4.31	6	1.69	8.48149	20	0.424074
CHEMBL1257851	O(C1CCN(CC1)C(C)C)c1cc2c(n3c(c2)C(=O)NC[C@H]3C)cc1	2.2e-05	2.97	4.65758	1.68758	6.58386	25	0.263355
CHEMBL562478	O1c2c(cccc2)C(=CC12CCNCC2)c1ccc(cc1C)C(=O)N(CC)CC	4.6e-06	3.65	5.33724	1.68724	7.54463	29	0.26016
CHEMBL426605	O(CC(O)CN(C(Cc1[nH]c2c(c1)cccc2)(C)C)CC#C)c1ccccc1C#N	6.7e-07	4.49	6.17393	1.68393	8.72735	30	0.290912
CHEMBL550337	Fc1ccc(cc1)Cn1c2c(nc1N1CCC(N(CCOC)C)CC1)cccc2	4.444e-06	3.67	5.35223	1.68223	7.56581	29	0.26089
CHEMBL2113242	O1[C@@]2(C3CCN(C2)CC3)CN(c2cc3c(occ3CC)cc2)C1=O	2.1e-05	3	4.67778	1.67778	6.61242	24	0.275518
CHEMBL192998	S(=O)(=O)(NCc1ccc(cc1)CC(=O)N([C@H](CN1C[C@@H](O)CC1)c1ccccc1)C)c1ccc(cc1)C	5.653e-06	3.57	5.24772	1.67772	7.41808	37	0.200489
CHEMBL476320	O(c1ccccc1CN(C(OCC)=O)[C@H]1CCNC1)c1ccccc1	4.2e-07	4.7	6.37675	1.67675	9.01406	25	0.360562
CHEMBL270583	Fc1ccc(cc1)C[C@@H]1CCCN(C1)[C@H](O)C[C@H](NC(=O)Nc1cc(ccc1)-c1nnnn1C)CC	9e-07	4.37	6.04576	1.67576	8.54617	36	0.237394
CHEMBL1078490	S(=O)(=O)(Nc1cc2CCN(CCc2cc1)Cc1n[nH]cc1)c1cc2CCC(Oc2cc1)(C)C	5e-07	4.63	6.30103	1.67103	8.90702	33	0.26991
CHEMBL2397347	O=C(N1CCN(C[C@H]1C)c1cccnc1C#N)C12CC3CC(C1)CC(C2)C3	1.24e-05	3.24	4.90658	1.66658	6.93585	27	0.256883
CHEMBL3084569	Fc1cc2c(cc(cc2)CN2[C@H]3CC(NC(=O)c4ccccc4C(=O)N4CCOCC4)C[C@@H]2CC3)cc1	8.2e-06	3.42	5.08619	1.66619	7.18974	37	0.194317
CHEMBL1669419	s1cccc1CN(CCC=1Cc2c(cccc2)C=1[C@@H](C)c1nccnc1)C	1.427e-06	4.18	5.84558	1.66558	8.2632	27	0.306044
CHEMBL273921	Fc1cc2nc(O)n(c2cc1)C1CCN(CC1)CCN1CCCc2c(cccc2)C1=O	1e-05	3.34	5	1.66	7.06791	31	0.227997
CHEMBL453169	O(C)c1cc2c(cc(cc2)-c2cnccc2N)cc1	1.11e-05	3.3	4.95468	1.65468	7.00384	19	0.368623
CHEMBL249058	s1c(C(=O)C)c(nc1NC(=O)N[C@@H]1CCN(C[C@H]1CN1C[C@@H](CCC1)Cc1ccc(F)cc1)C1CCN(CC1)C(=O)C)C	3.6e-05	2.79	4.4437	1.6537	6.28153	43	0.146082
CHEMBL519761	O1c2c(C(=O)C(O[C@@H]3O[C@@H](C)[C@H](OC(=O)C)[C@@H](OC(=O)C)[C@H]3OC(=O)C)=C1c1ccc(O)cc1)c(O)cc(O)c2	4.33e-05	2.71	4.36351	1.65351	6.16818	40	0.154204
CHEMBL2397306	s1c(-c2ccc(N)cc2)c(nc1NC(=O)CN1[C@@H](COC1=O)C(C)C)C	2.5e-05	2.95	4.60206	1.65206	6.50539	26	0.250207
CHEMBL1669418	o1cccc1CN(CCC=1Cc2c(cccc2)C=1[C@@H](C)c1nccnc1)C	4.363e-06	3.71	5.36021	1.65021	7.5771	27	0.280633
CHEMBL178711	s1c(ccc1CNCc1sc(cc1)-c1cccnc1)-c1cccnc1	1.29e-05	3.24	4.88941	1.64941	6.91158	25	0.276463
CHEMBL1271428	FC(F)(F)c1cccnc1N[C@H]1CCN(C1)C(OC1C2CC3(CC1CC(C3)C2)C(=O)N)=O	3e-05	2.88	4.52288	1.64288	6.39346	32	0.199796
CHEMBL2018905	S(CCC)c1[nH]c2c(n1)cc(OC)cc2	1.94e-06	4.07	5.7122	1.6422	8.07466	15	0.53831
CHEMBL2338049	Clc1c(O[C@@H]([C@@H]2CCNC2)c2ccccc2)c(F)ccc1F	1.99526e-06	4.06	5.7	1.64	8.05742	22	0.366246
CHEMBL1092597	O(C)c1nccnc1[C@H](C)C=1c2c(CC=1CCN(C)C)cccc2	1.7e-05	3.13	4.76955	1.63955	6.74215	24	0.280923
CHEMBL222460	Clc1cc(C=2c3cc(ccc3NC(=O)C=2CCO)C(F)(F)F)c(O)cc1	3.5e-05	2.82	4.45593	1.63593	6.29882	26	0.242262
CHEMBL1762475	Cl.FC(F)(F)c1cc(O[C@@H](CCNC)c2ccccc2)c(cc1)C#N	1.6e-06	4.16	5.79588	1.63588	8.19295	25	0.327718
CHEMBL1794074	Cl.Cl.S(=O)(=O)(N)c1cc(Nc2nc(N(C)c3cc4nn(C)c(c4cc3)C)ccn2)ccc1	1.6e-05	3.16	4.79588	1.63588	6.77937	32	0.211855
CHEMBL449840	[nH]1cc(nc1)Cc1cc(ccc1)C#Cc1ccccc1	4.88e-07	4.68	6.31158	1.63158	8.92193	20	0.446097
CHEMBL118	S(=O)(=O)(N)c1ccc(-n2nc(cc2-c2ccc(cc2)C)C(F)(F)F)cc1	1e-06	4.37	6	1.63	8.48149	26	0.326211
CHEMBL2170747	s1c2cc(O)ccc2nc1NC(=O)c1c(F)c(O)ccc1F	5.4e-05	2.64	4.26761	1.62761	6.03261	22	0.274209
CHEMBL463389	[nH]1c2c(cc(cc2)C2(CCNC2)CCC)cc1	7.5e-06	3.5	5.12494	1.62494	7.24452	17	0.426148
CHEMBL401160	s1c(C(=O)C)c(nc1NC(=O)N[C@@H]1CCN(C[C@H]1CN1C[C@@H](CCC1)Cc1ccc(F)cc1)CC(=O)N(C)C)C	2.8e-06	3.93	5.55284	1.62284	7.84939	40	0.196235
CHEMBL429459	Fc1cc(cc(F)c1)C1(Oc2c(N(CCCCO)C1=O)cc(cc2)-c1c(nc(nc1N)N)CC)C	6.96e-06	3.54	5.15739	1.61739	7.29039	35	0.208297
CHEMBL561882	O1c2c(cccc2)C(=CC12CCNCC2)c1ccc(cc1)C(=O)N(C(C)C)C(C)C	4.1e-06	3.77	5.38722	1.61722	7.61527	30	0.253842
CHEMBL1649659	FC(F)(F)c1nn(c2c1CCCC2)-c1ccc(cc1)C(=O)N1CCCC1	6e-06	3.61	5.22185	1.61185	7.38151	26	0.283904
CHEMBL270996	Fc1c2cc([nH]c2ccc1OC1=NC=Nn2c1c(C)c(OC[C@H](OC(=O)CN)C)c2)C	1.2e-05	3.31	4.92082	1.61082	6.95598	31	0.224386
CHEMBL445897	Clc1ccncc1-c1oc(nc1)C(N1C[C@H](N(CC1)C[C@@H](O)C[C@@H](Cc1ccccc1)C(=O)NC1C2C(OC[C@H]1O)C=CC=C2)C(=O)NCC(F)(F)F)(C)C	4.17e-06	3.77	5.37986	1.60986	7.60488	55	0.13827
CHEMBL181620	o1c2c(cc1CC(O)CNC(C)(C)C)cccc2CC	4.8e-06	3.71	5.31876	1.60876	7.5185	20	0.375925
CHEMBL2018482	Fc1ccc(Oc2ccc(NC(=O)[C@H]3N(C[C@@H](C3)c3ccccc3)C(=O)Cc3[nH]cnc3)cc2)cc1	6.63e-07	4.57	6.17849	1.60849	8.73379	36	0.242605
CHEMBL2018484	Fc1ccc(Oc2ccc(NC(=O)[C@H]3N(C[C@@H](C3)Cc3ccccc3)C(=O)Cn3ncnc3)cc2)cc1	3.92e-07	4.8	6.40671	1.60671	9.05641	37	0.244768
CHEMBL2018920	Brc1ccc(cc1)CSc1[nH]c2c(n1)cc(OC)cc2	9e-08	5.44	7.04576	1.60576	9.95975	20	0.497988
CHEMBL2337978	Clc1cc(cc(Cl)c1)C(=O)NC1CCN(C1)CCNC(=O)NC(C)(C)C	2.6e-06	3.98	5.58503	1.60503	7.89489	26	0.30365
CHEMBL205129	O(CCCN1CCC(CC1)Cc1nc[nH]c1)c1ccc(cc1)CCN1CCCCC1	1e-06	4.4	6	1.6	8.48149	30	0.282716
CHEMBL1672960	O([C@@H](c1ccccc1CO)C1CC1)C[C@@H](O)CNC(Cc1cc2c(cc1)cccc2)(C)C	1.2e-06	4.33	5.92082	1.59082	8.36956	32	0.261549
CHEMBL1113	Clc1cc2c(Oc3c(N=C2N2CCNCC2)cccc3)cc1	1e-05	3.41	5	1.59	7.06791	22	0.321269
CHEMBL400172	s1c(C(=O)C)c(nc1NC(=O)N[C@@H]1CCN(C[C@H]1CN1C[C@@H](CCC1)Cc1ccc(F)cc1)C(=O)C1CCCC1)C	3.4e-07	4.88	6.46852	1.58852	9.14378	41	0.223019
CHEMBL493014	[nH]1cc(nc1)Cc1cc(ccc1)C#CC(C)(C)C	1.785e-06	4.16	5.74836	1.58836	8.12578	18	0.451432
CHEMBL512044	O([C@H]1c2c(C[C@@]1(O)CNC)cccc2)c1ccc(cc1C)C	6.5e-06	3.6	5.18709	1.58709	7.33237	22	0.33329
CHEMBL41	FC(F)(F)c1ccc(OC(CCNC)c2ccccc2)cc1	7e-07	4.57	6.1549	1.5849	8.70045	22	0.395475
CHEMBL1092663	n1ccncc1[C@H](C)C=1c2c(CC=1CCN(C)C)cc(cc2)C	2.2e-05	3.08	4.65758	1.57758	6.58386	23	0.286255
CHEMBL2326686	Clc1cc(ccc1F)C1CC=CCNC1	6.4e-06	3.62	5.19382	1.57382	7.34189	15	0.489459
CHEMBL203696	FC1(F)CCN(CC1)Cc1ccc(OCCCN2CCC(CC2)Cc2nc[nH]c2)cc1	6e-06	3.65	5.22185	1.57185	7.38151	31	0.238113
CHEMBL1762474	Clc1cc(S[C@@H](CCN)c2ccccc2)c(cc1)C#N.OC(=O)\C=C\C(O)=O	4.1e-06	3.82	5.38722	1.56722	7.61527	28	0.271974
CHEMBL204193	O(CCN1CCC(CC1)Cc1nc[nH]c1)c1ccc(cc1)CN1CCCCC1	3e-06	3.96	5.52288	1.56288	7.80704	28	0.278823
CHEMBL558467	Fc1ccc(cc1)Cn1c2c(nc1N1CCC(N(C)C)CC1)cccc2	1.2798e-05	3.33	4.89286	1.56286	6.91645	26	0.266017
CHEMBL552338	FC(F)(F)c1ccccc1C(=O)N(CC1CCC1)[C@H]1CCNC1	1.51e-05	3.26	4.82102	1.56102	6.81491	23	0.2963
CHEMBL3084571	Fc1cc2c(cc(cc2)CN2[C@H]3CC(NC(=O)c4ccncc4C(=O)N4CCCCC4)C[C@@H]2CC3)cc1	6.8e-06	3.61	5.16749	1.55749	7.30467	37	0.197423
CHEMBL2338407	Clc1cc(cc(Cl)c1)C(=O)NCC1CCCN(C1)CCNC(=O)NC(C)(C)C	1.6e-06	4.24	5.79588	1.55588	8.19295	28	0.292605
CHEMBL1092259	Clc1cc2CC(CCN(C)C)=C(c2cc1)Cc1nccnc1	3.6e-05	2.89	4.4437	1.5537	6.28153	22	0.285524
CHEMBL2337602	Clc1c(O[C@H]([C@H]2CCNC2)c2ccccc2)cccc1Cl	7.9433e-07	4.55	6.1	1.55	8.62285	21	0.410612
CHEMBL2036757	Clc1cc(NC(=O)N2CCN(CC2)C[C@@H]2CCCN(C2)C2CC2)ccc1Cl	3.1e-06	3.96	5.50864	1.54864	7.78691	27	0.288404
CHEMBL189724	Clc1ccc(Cl)cc1SCCCN1CCNCC1	2.1e-06	4.13	5.67778	1.54778	8.026	18	0.445889
CHEMBL246633	Fc1ccc(cc1)C1(O)CCN(CC1)C(C(O)c1cc(-c2ccccc2)c(O)cc1)C	8.4e-06	3.53	5.07572	1.54572	7.17494	31	0.23145
CHEMBL3127501	S(=O)(=O)(c1cc(OC(F)(F)F)ccc1)c1ccc(NC(=O)[C@@H]2C[C@H]2c2cccnc2)cc1	3.2e-06	3.95	5.49485	1.54485	7.76742	32	0.242732
CHEMBL557210	Fc1ccc(cc1)Cn1c2c(nc1N1CCC(N(CCO)C)CC1)cccc2	3.515e-05	2.91	4.45407	1.54407	6.2962	28	0.224864
CHEMBL1935433	Fc1ccc(cc1)Cn1c2c(nc1C1CCCN(C1)CC(=O)N1CCCCC1)cccc2	1.4e-06	4.31	5.85387	1.54387	8.27492	32	0.258591
CHEMBL1243305	S(CC(C1CCNCC1)c1nc[nH]c1)c1ccc(cc1)C(F)(F)F	9.5e-06	3.48	5.02228	1.54228	7.0994	24	0.295808
CHEMBL478612	S(=O)(=O)(N)c1cc(Nc2nc(N(C)c3cc4n(C)c(nc4cc3)C)ccn2)ccc1	2.5e-05	3.06	4.60206	1.54206	6.50539	30	0.216846
CHEMBL151170	O(CCCC)c1ccc(cc1)-c1nc[nH]c1	6e-06	3.68	5.22185	1.54185	7.38151	16	0.461344
CHEMBL256068	Fc1ccc(cc1)C[C@@H]1CCCN(C1)[C@H](O)C[C@H](NC(=O)Nc1cc(cc(c1)C(=O)C)C(=O)C)C	7e-06	3.62	5.1549	1.5349	7.28687	35	0.208196
CHEMBL551613	O1c2c(cccc2)C(=CC12CCNCC2)c1ccc(cc1)C(=O)N1Cc2c(C1)cccc2	1.8e-06	4.21	5.74473	1.53473	8.12064	32	0.25377
CHEMBL471067	O1C[C@@H](Cc2cc3OCOc3cc2)[C@@H](Cc2cc(OC)c(OC)c(OC)c2)C1=O	9.57e-05	2.49	4.01909	1.52909	5.68131	29	0.195907
CHEMBL3115180	s1cncc1COC(=O)N[C@@H](Cc1ccccc1)CC[C@@H](NC(=O)[C@H](NC(=O)N(Cc1nc(sc1)C(C)C)C)CCN1CCOCC1)Cc1ccccc1	3.1e-06	3.98	5.50864	1.52864	7.78691	54	0.144202
CHEMBL562894	O(C)c1ccc(cc1)Cn1c2c(nc1N1CCC(n3ncc(c3)C)CC1)cccc2	7.319e-06	3.61	5.13555	1.52555	7.25952	30	0.241984
CHEMBL429846	Fc1ccc(cc1)C[C@@H]1CCCN(C1)[C@H](O)C[C@H](NC(=O)Nc1cc(cc(c1)-c1nocc1)-c1nocc1)C	1.5e-06	4.3	5.82391	1.52391	8.23257	39	0.211092
CHEMBL1079290	Clc1ccc(NC(=O)N2CC(CCC2)(CCO)c2ccccc2)cc1	1e-05	3.48	5	1.52	7.06791	25	0.282716
CHEMBL3289811	Clc1cc(ccc1C(O)Cn1c2nc(OC3CCOC3)ccc2nc1N)C(F)(F)F	1.25e-05	3.39	4.90309	1.51309	6.93092	30	0.231031
CHEMBL217300	s1c(ccc1C(=O)N(C)[C@H]1CCN(C1)C(=O)N1C[C@H](NC2CCOCC2)CC1)-c1ccc(cc1)CC	5.01187e-06	3.79	5.3	1.51	7.49198	36	0.208111
CHEMBL258323	Fc1ccc(cc1)C[C@@H]1CCCN(C1)CC[C@@H](NC(=O)Nc1cc(ccc1)-c1nnnn1C)C	2e-07	5.19	6.69897	1.50897	9.46954	34	0.278516
CHEMBL464245	Fc1cccc(F)c1C(=O)N(CC(O)(CNC(=O)c1cnn(c1N)-c1ccc(F)cc1)C(F)(F)F)CCF	2e-05	3.19	4.69897	1.50897	6.64238	38	0.174799
CHEMBL525375	O([C@H]1c2c(CC[C@H]1CNC)cccc2)c1ccccc1C	8e-07	4.59	6.09691	1.50691	8.61848	21	0.410404
CHEMBL464907	Fc1cccc(F)c1C(=O)N(CC(O)(CNC(=O)c1cnn(c1N)-c1ccc(F)cc1)C(F)(F)F)C	3.6e-05	2.94	4.4437	1.5037	6.28153	36	0.174487
CHEMBL1224321	Fc1cc(cc2c1[nH]cc2)C(=O)C1(CCNC1)CCC(C)(C)C	6e-07	4.72	6.22185	1.50185	8.79509	23	0.382395
CHEMBL412873	N12[C@@H]([C@@H]3C[C@@H]([C@H]4N(CCCC4)C3)C1)CCCC2	6e-05	2.72	4.22185	1.50185	5.96793	17	0.351055
CHEMBL3112968	Clc1cc(ccc1)C1(CCC(N2CCc3c(nc(nc3C3CC3)C(F)(F)F)C2=O)CC1)CN	1e-05	3.5	5	1.5	7.06791	33	0.214179
CHEMBL1813474	Clc1cc(ccc1Cl)[C@@]12[C@@H](CCC1)CNC2	2.47e-06	4.11	5.6073	1.4973	7.92638	16	0.495399
CHEMBL1766005	O(C(=O)C(C(n1ccnc1)c1ccc(Nc2cc3c(cc2)cccc3)cc1)(C)C)C	6e-07	4.73	6.22185	1.49185	8.79509	30	0.29317
CHEMBL245128	Clc1ccc(cc1)-c1cc2c(N=CN(C[C@H]3CCCN(C3)C(C)C)C2=O)cc1	2e-07	5.22	6.69897	1.47897	9.46954	28	0.338198
CHEMBL538632	S(C(C)(C)C)c1c2cc(OCc3ncccc3)ccc2n(Cc2ccc(cc2)-c2cccnc2)c1CC(C(O)=O)(C)C	2.6e-09	7.11	8.58503	1.47503	12.1356	42	0.288944
CHEMBL226385	Clc1cc(Nc2nc(C(F)(F)F)c(cn2)C(=O)NCC2CCOCC2)ccc1	5.1e-05	2.82	4.29243	1.47243	6.0677	28	0.216704
CHEMBL513130	o1nc(nc1-c1nn(c2c1cccc2)Cc1cc2OCOc2cc1)CNC(OC(C)(C)C)=O	3.3e-06	4.01	5.48149	1.47149	7.74853	33	0.234804
CHEMBL563451	n1c2c(n(Cc3ccc(cc3)C)c1N1CCC(N(C)C)CC1)cccc2	7.21e-06	3.68	5.14206	1.46206	7.26873	26	0.279566
CHEMBL475927	Clc1ccc(cc1)C(NC(=O)CNC(=O)c1ccc(cc1)C#N)c1ccccc1	4.9e-06	3.85	5.3098	1.4598	7.50584	29	0.258822
CHEMBL2373353	N12C([C@H]3C[C@H](C4N(CCCC4)C3)C1)CCCC2	6.64e-05	2.72	4.17783	1.45783	5.90571	17	0.347394
CHEMBL1173087	Clc1cc(ccc1Cl)[C@@]12C[C@]1(CNCC2)C(OC)CC=C	3e-06	4.07	5.52288	1.45288	7.80704	21	0.371764
CHEMBL1642908	Clc1cc(ccc1Cl)[C@@H]1C[C@@H](Cc2c1cccc2)CNC	1.54e-07	5.36	6.81248	1.45248	9.62999	21	0.458571
CHEMBL556450	Fc1ccc(cc1)Cn1c2c(nc1N1CCC(n3ncc(c3)C)CC1)cccc2	5.219e-06	3.83	5.28241	1.45241	7.46712	29	0.257487
CHEMBL512551	O(C(=O)c1[nH]c2c(cc(cc2)C2(CCNC2)Cc2ccccc2)c1)CC	6e-07	4.77	6.22185	1.45185	8.79509	26	0.338273
[truncated: 736 more rows]

## Sheet: Table S5
Exploring the Chemical Space of Cytochrome P450 Inhibitors using Integrated Physicochemical Parameters, Drug Efficiency Metrics and Decision Tree Models Yusra Sajid Kiani and Ishrat Jabeen* Research Center for Modeling and Simulation (RCMS), National University of Science and Technology (NUST), Sector H-12, 44000, Islamabad, Pakistan * Correspondence: Corresponding Author: Ishrat.jabeen@rcms.nust…
[truncated: 2,751 more rows]

[truncated: 1 more sheets: Table S6]
